# Supplementary material for: Integration of Gas Exchange With Metabolomics: High-Throughput Phenotyping Methods for Screening Biostimulant-Elicited Beneficial Responses to Short-Term Water Deficit
Source: Front Plant Sci. 2021 Jun 1;12:678925. doi: 10.3389/fpls.2021.678925 (PMC8204046; doi:10.3389/fpls.2021.678925)
Supplement: Supplementary Table 1 — Untargeted metabolomics data set containing the annotated compounds in both ***MS-only and MS/MS following the ultra-high performance liquid chromatography coupled to a quadrupole-time-of-flight mass spectrometer (UHPLC-QTOF-MS) analysis. [file Table_1.XLSX]

## Sheet: Legenda
LEGENDA
Acronym	irrigation treatment	biostimulant treatment
WS	water stressed
WW	well watered
BT		biostimulant treated
NB		no biostimulant
Samples are represented by a combination of irrigation treatment and biostimulant treatment plus progressive number of biological replicate (e. g. WS - BT 1)

## Sheet: Dataset
Compound	WS - NB 1	WW - NB 1	WW - BT 1	WW - BT 2	WW - NB 2	WW - NB 3	WS - BT 1	WW - NB 4	WW - BT 3	WS - NB 2	WS - BT 2	WS - NB 3	WS - NB 4	WW - BT 4	WS - NB 5	WW - BT 5	WS - BT 3	WS - BT 4	WS - BT 5	WW - NB 5	Alignment Value	Annotations	CAS Number	ChEBI ID	CompositeSpectrum	Retention Time
10&beta;-hydroxytaxa-4(20),11-dien-5&alpha;-yl acetate	614700	666824	1084556	976102	708327	423549	737023	1201853	1222376	910756	773121	922948	1999956	523248	2215260	191419	1	1	429780	1383734	10-BETA-HYDROXYTAXA-42011-DIEN-5-ALPH	10-BETA-HYDROXYTAXA-42011-DIEN-5-ALPH [ C22 H34 O3, tgt=36.15, overall=36.15 ]			(348.27478, 15150.302)(349.27805, 1930.6652)(353.23032, 58733.668)(354.23352, 9935.342)(355.2351, 1102.125)	10.768
10-deacetyl-2-debenzoylbaccatin III	1	1	1	1	1	1	1	1	1	1	329036	1	1	1	1	1	1	255988	1	1	10-DEACETYL-2-DEBENZOYLBACCATIN-III	10-DEACETYL-2-DEBENZOYLBACCATIN-III [ C22 H32 O9, tgt= ]			(423.19824, 14422.83)(424.20166, 1383.4299)	5.857
10-deacetylbaccatin III	148922	844918	938464	1090314	2021869	991523	212479	841480	1000320	168635	120815	973246	117270	264288	143287	922663	3280517	130416	349760	1	10-DEACETYLBACCATIN-III	10-DEACETYLBACCATIN-III [ C29 H36 O10, tgt=59.83, overall=59.83 ]			(544.5725, 1339.9801)(527.2245, 1674.2139)(527.2248, 109.24)(545.2459, 7262.9766)(546.2505, 237.49)(532.24695, 407.0)(533.2576, 4524.33)(563.98395, 5156.5225)(566.2633, 139.2)(545.25024, 7280.7705)(570.5783, 3157.4402)(549.20886, 8362.9795)(550.2123, 875.75745)	7.6791
10-deoxysarpagine	1	1	1	1	1	1	1	1	1	1	123401	1	1	1	1	1	103473	1	1	1	10-DEOXYSARPAGINE	10-DEOXYSARPAGINE [ C19 H22 N2 O, tgt= ]			(316.2244, 5825.175)(317.2267, 302.56)(294.19235, 5530.06)	16.204
10-formyl-tetrahydrofolate mono-L-glutamate	573821	1	656512	655946	1	296271	1	328468	489202	858991	1	183073	739442	281230	689688	509858	1	326687	1	1	10-FORMYL-THF	10-FORMYL-THF [ C20 H21 N7 O7, tgt=68.70, overall=68.70 ]			(475.16022, 3858.54)(455.1543, 52685.0)(456.1571, 10040.35)(457.1543, 886.65)(475.15967, 1907.4844)(455.15372, 158034.86)(456.15652, 29501.486)(457.15417, 5925.5347)(458.15884, 1397.865)(471.1815, 14006.69)(472.1846, 1430.22)(499.14288, 3072.36)	7.87267
10-hydroxydecanoate	1	97632	1	1	1	1	1	1	1	1	178588	119454	1	1	1	1	134685	122944	159360	139684	10-HYDROXYDECANOATE	10-HYDROXYDECANOATE [ C10 H19 O3, tgt=46.86, overall=46.86 ]			(191.143, 1933.6)(171.126, 6166.775)(173.1331, 6520.0146)(189.14046, 5094.1133)(173.13965, 2598.03)(208.17014, 6853.8447)(187.15538, 6625.293)(215.13838, 2376.724)(194.11787, 808.33496)	13.0221
10-hydroxydihydrosanguinarine	1	1098759	1	1	1271898	1	1	1	1	1	177050	1181399	1	1	1	1	264795	1	359428	879984	10-HYDROXYDIHYDROSANGUINARINE	10-HYDROXYDIHYDROSANGUINARINE [ C20H15NO5, tgt= ]			(349.09976, 7647.36)(351.1044, 3462.7468)(349.1254, 63377.934)(350.12848, 9486.045)(376.1009, 556.565)	3.22205
1-&alpha;-linolenoyl-2-&alpha;-linolenoyl-phosphatidylcholine	400357	205270	129547	275520	723395	752081	148525	141193	392764	341975	189170	277462	384788	715937	466811	1	245934	205297	138775	693066	1-183-2-183-SN-GLYCEROL-PHOSPHOCHOLINE	1-183-2-183-SN-GLYCEROL-PHOSPHOCHOLINE [ C44 H76 N O8 P, tgt=62.40, overall=62.40 ]			(778.5465, 1562.304)(764.5326, 69747.016)(765.6803, 31065.53)(766.544, 14028.706)(795.5721, 5058.3423)(780.23883, 6189.9565)(778.57263, 3373.3699)(800.52954, 13708.87)(801.5305, 221.47)(783.83856, 7807.953)(784.50555, 3453.9077)	22.0313
1,2-di-O-sinapoyl-&beta;-D-glucose	1	1	1	1	1	1	258284	1	1	1	154559	1	1	1	1	1	1	1	1	1	12-BIS-O-SINAPOYL-BETA-D-GLUCOSIDE	12-BIS-O-SINAPOYL-BETA-D-GLUCOSIDE [ C28H32O14, tgt= ]			(611.23035, 13958.609)(612.2332, 3107.105)	10
1,2-dehydroreticuline	235611	1	1	1	1	1	1	1	1	224517	714836	1	254911	185288	423108	1	591551	673691	639927	1	12-DEHYDRORETICULINIUM	12-DEHYDRORETICULINIUM [ C19 H22 N O4, tgt=47.60, overall=47.60 ]			(311.14728, 484.00998)(351.14206, 1691.8734)(313.1624, 502.90997)(329.15677, 9381.076)(330.1599, 1229.68)(335.13403, 1844.4033)	3.924
1,2-dihydrovomilenine	1006476	1015496	972902	1010013	1114870	973224	2420048	884077	1079504	1028110	1446889	1069259	992972	765152	855305	1031455	2365495	2433766	1483457	987506	12-DIHYDROVOMILENINE	12-DIHYDROVOMILENINE [ C21 H24 N2 O3, tgt=68.08, overall=68.08 ]			(352.17792, 38503.652)(353.18256, 14554.866)(337.1673, 1470.07)(353.18222, 35259.355)(354.1834, 268.56)(378.17822, 762.84)(358.6255, 1713.8481)(362.1801, 3012.94)	8.573
12-hydroxydihydrochelirubine	1502017	1	350310	339661	1	410795	1	1	289366	1	291584	1	411089	1	519602	1	1	466541	1	150651	12-HYDROXYDIHYDROCHELIRUBINE	12-HYDROXYDIHYDROCHELIRUBINE [ C21 H17 N O6, tgt=43.11, overall=43.11 ]			(379.7705, 18035.295)(382.6138, 1870.14)(384.1142, 1353.68)(362.0964, 6061.96)(365.1054, 49544.85)(366.1073, 6006.265)(381.114, 15362.35)(382.117, 1396.19)(365.1193, 988.9666)(379.80447, 1209.425)(384.08334, 10045.926)(385.0873, 191.6)	3.7362
(9Z)-12-oxo-dodec-9-enoate	228840	320537	311797	1	447160	1	1	226788	1	1	1	360069	297537	279900	1	1712783	245697	371473	1	433773	12-OXO-CIS-9-DODECENOATE	12-OXO-CIS-9-DODECENOATE [ C12 H19 O3, tgt=44.57, overall=44.57 ]			(211.53433, 11839.636)(212.13611, 408.265)(193.52277, 1005.7961)(217.1558, 2856.21)(230.1755, 1300.395)(231.1712, 6098.67)(237.1251, 107.79)(239.1415, 106.42)(220.1188, 6622.98)	6.664
13<SUP>1</SUP>-oxo-magnesium-protoporphyrin IX 13-monomethyl ester	369203	132535	165726	95576	86517	183503	640134	211495	181932	282112	371670	107616	242273	444571	328570	148137	1	1	1	99882	131-OXO-MAGNESIUM-PROTOPORPHYRIN-IX-13-M	131-OXO-MAGNESIUM-PROTOPORPHYRIN-IX-13-M [ C35 H31 Mg N4 O5, tgt=37.76, overall=37.76 ]			(613.2107, 14749.294)(614.21405, 3126.3533)(616.22614, 1346.585)(611.23035, 14377.33)(612.2332, 3191.835)	7.75105
caffeine	469115	2939029	1337566	1517077	2239039	1	1	1460225	1765215	1823605	5687158	500356	381588	1	2042239	2455861	1	1	1244821	1983843	1-3-7-TRIMETHYLXANTHINE	1-3-7-TRIMETHYLXANTHINE [ C8 H10 N4 O2, tgt=46.12, overall=46.12 ]			(195.47917, 475.13202)(176.27074, 11272.478)(178.5737, 107.535)(179.072, 106.27)(180.36072, 980.7963)(181.08572, 682.39856)(214.94269, 1253.1354)(215.1264, 2670.17)(199.1088, 566.25)(217.68758, 482.51764)(219.068, 562.84)(199.64156, 1675.9733)	3.55078
1,3-dihydroxy-N-methylacridone	5817257	5119230	5254627	4706545	5077873	4630621	2553958	5141666	5514579	5921783	2587294	6915867	5298377	3898857	5015000	4616919	2528855	2378602	2690662	4987239	13-DIHYDROXY-N-METHYLACRIDONE	13-DIHYDROXY-N-METHYLACRIDONE [ C14 H11 N O3, tgt=75.06, overall=75.06 ]			(241.07227, 22434.348)(242.07549, 2250.3677)(223.06152, 6934.4014)(241.0992, 31.33)	8.617
(13<i>S</i>)-HPODE	1	1	1	1	1	1	618592	1	1	1	822925	783682	1	1	1	1	676584	572785	576075	1	13-HYDROPEROXYOCTADECA-911-DIENOATE	13-HYDROPEROXYOCTADECA-911-DIENOATE [ C18H31O4, tgt= ]			(311.22214, 3830.6785)(293.21188, 34981.266)(294.2151, 5592.275)(335.21033, 1304.385)	10.165
13-hydroxylupanine	1	102431	135924	1	1	118657	1	132396	1	1	1	104821	1	1	1	1	1	1	1	109234	13-HYDROXYLUPININE	13-HYDROXYLUPININE [ C15 H25 N2 O2, tgt=56.85, overall=56.85 ]			(248.18584, 7149.172)(250.19226, 2395.55)	5.24971
13<SUP>1</SUP>-hydroxy-magnesium-protoporphyrin IX 13-monomethyl ester	1	1	495245	1	467952	1	527137	1	1	570113	516042	532425	231723	192926	606392	525768	533050	493539	534017	176253	13-HYDROXY-MAGNESIUM-PROTOPORP	13-HYDROXY-MAGNESIUM-PROTOPORP [ C35H33MgN4O5, tgt= ]			(633.28, 575.0022)(634.27527, 740.08374)(619.2122, 12561.054)(620.2152, 781.5985)	8.621
15,16-dihydrobiliverdin	98869	1	1	1	1	1	91863	1	1	1	1	1	1	1	1	1	1	260182	110143	1	1516-DIHYDROBILIVERDIN	1516-DIHYDROBILIVERDIN [ C33 H34 N4 O6, tgt=2.58, overall=2.58 ]			(585.2544, 4606.44)(566.2501, 1000.0801)(569.2613, 1244.04)(569.262, 393.39)(583.9438, 1470.3633)(586.2827, 6004.44)(587.3018, 2770.07)	7.915
1,5-dideoxy-1,5-imino-D-galactitol	1	1	1	1	1	1	1	1	1	1	1	1	1	1060177	1	1	1	1	1012682	1	15-DIDEOXY-15-IMINO-D-GALACTITOL	15-DIDEOXY-15-IMINO-D-GALACTITOL [ C6 H14 N O4, tgt=45.70, overall=45.70 ]			(187.07956, 72194.625)(188.07996, 9994.439)	1.406
16-epivellosimine	168597	166291	1	1	1	1	1	1	190999	195651	1	1	200313	154725	305530	1	1	1	1	1	16-EPIVELLOSIMINE	16-EPIVELLOSIMINE [ C19 H20 N2 O, tgt=38.01, overall=38.01 ]			(274.14774, 1484.2772)(315.14175, 4921.7314)(300.14655, 492.805)	4.10987
16-hydroxypalmitate	178633	145792	156031	178843	122292	150960	225922	184191	199104	221945	1	317886	560084	122490	327446	82678	247519	105309	196652	182638	16-HYDROXYPALMITATE	16-HYDROXYPALMITATE [ C16 H31 O3, tgt=44.24, overall=44.24 ]			(294.21518, 5554.442)(295.2179, 1172.76)(276.2048, 8666.327)	11.6932
16-hydroxytabersonine	1819440	852540	863830	1335306	807006	1029009	999740	1248014	1254384	1303989	487959	1231864	1436242	1414893	1255243	1148931	1034022	659709	592312	965952	16-HYDROXYTABERSONINE	16-HYDROXYTABERSONINE [ C21 H25 N2 O3, tgt=59.95, overall=59.95 ]			(339.19318, 857.4944)(376.2448, 1169.18)(358.16547, 40335.41)(359.16794, 2441.9578)	14.527
(3R)-3-hydroxy-16-methoxy-2,3-dihydrotabersonine	1	1	1	1	1	1	750792	1	1	1	435515	1	1	1	1	1	1	176003	1	1	16-METHOXY-23-DIHYDRO-3-HYDROXYTABERSON	16-METHOXY-23-DIHYDRO-3-HYDROXYTABERSON [ C22 H29 N2 O4, tgt= ]			(369.2108, 1893.99)(386.23758, 20986.18)(387.24054, 3876.895)(412.20126, 7971.6265)(391.19348, 120404.98)(392.19644, 19147.232)(393.19754, 3364.2048)	4.872
paraxanthine	1482169	1492335	1	1	1541502	1	4133254	1	1	1	4034750	1	1	434640	1604435	1	3965624	3844017	1	1	1-7-DIMETHYLXANTHINE	1-7-DIMETHYLXANTHINE [ C7 H8 N4 O2, tgt=80.11, overall=80.11 ]			(182.73714, 7913.053)(164.39046, 6400.533)(166.0656, 126.77)(184.0742, 195.93)(163.06155, 72931.445)(164.06503, 4410.725)(200.1022, 1620.55)(180.08765, 5643.1953)(203.05403, 24369.977)(204.0563, 1475.585)(188.0451, 884.08)	7.2865
17-<i>O</i>-acetylnorajmaline	665096	643059	597669	671893	665119	651805	625953	644613	1	1	679523	652179	1	1	1	651377	1	1	1	675503	17-O-ACETYLNORAJMALINE	17-O-ACETYLNORAJMALINE [ C21 H26 N2 O3, tgt=19.39, overall=19.39 ]			(354.1837, 112.09)(341.2113, 2024.485)(355.2231, 916.9991)(356.23157, 3574.335)(378.17844, 608.1025)(359.1764, 15088.118)	8.932
17-O-deacetylvindoline	3231263	2625229	2501845	2159228	3623191	2156653	2442463	2176479	3077223	3526387	4189155	2396023	3670130	2421645	3230621	3394953	3077031	4272730	2444596	1	17-O-DEACETYLVINDOLINE	17-O-DEACETYLVINDOLINE [ C23 H31 N2 O5, tgt=51.50, overall=51.50 ]			(415.21228, 79422.3)(416.2153, 18879.969)(417.218, 2018.277)	14.804
18-hydroxyoleate	1	1	397003	273833	244406	1	1	303463	306508	1	1513039	1	349929	201406	194109	1	2725258	1550685	1766577	340420	18-HYDROXYOLEATE	18-HYDROXYOLEATE [ C18 H33 O3, tgt=72.44, overall=72.44 ]			(279.23242, 15278.031)(280.2356, 1291.8108)(297.2621, 21423.082)(298.2738, 1478.8201)(324.23596, 348.84497)(306.48227, 7831.1636)(306.99246, 6772.032)(307.2436, 2828.35)	16.171
18-oxo-oleate	1	1	1	1	1	1	1	1	1	1	559425	1	1	1	1	1	1	1	336472	1	18-OXOOLEATE	18-OXOOLEATE [ C18H31O3, tgt= ]			(295.22705, 18924.164)(296.22974, 2511.795)(277.21664, 9556.64)(278.2195, 1139.41)	10.812
3-amino-1-hydroxyacetone 1-phosphate	86542	86592	89255	162092	93387	220512	120940	151518	75555	73963	327959	95222	110216	77437	87317	231154	429427	381554	381074	80359	1-AMINO-PROPAN-2-ONE-3-PHOSPHATE	1-AMINO-PROPAN-2-ONE-3-PHOSPHATE [ C3 H7 N O5 P, tgt=54.93, overall=54.93 ]			(169.50555, 3616.5212)(169.00179, 486.95746)(169.9954, 464.45)(151.49931, 8252.039)(154.00354, 6626.5576)(173.02371, 650.5675)(153.01115, 417.35498)(188.58488, 3036.3645)(189.04514, 1019.704)(169.03569, 7074.425)	1.536
1-chloro-2,4-dinitrobenzene	391104	423697	377563	428748	467707	366146	269929	368102	387275	382960	170468	272976	309058	381004	379646	296110	309937	229556	274211	364732	1-CHLORO-24-DINITROBENZENE	1-CHLORO-24-DINITROBENZENE [ C6 H3 Cl N2 O4, tgt=47.62, overall=47.62 ]			(201.97484, 3615.179)(183.9643, 15348.542)(207.9871, 743.217)(203.50632, 1376.1259)(208.00647, 984.3733)(226.9679, 558.78)(209.9578, 420.21)	1.41
1-kestotriose	384713	1	341997	328255	1	326107	776759	292776	373906	788041	787846	1	349180	1	355234	363190	841574	749984	829199	1	1-KESTOTRIOSE	1-KESTOTRIOSE [ C18 H32 O16, tgt=16.90, overall=16.90 ]			(487.16998, 16244.691)(488.17377, 943.66003)	8.617
(<i>R</i>)-2,3-dihydroxy-3-methylpentanoate	799268	597763	870614	810928	625428	643679	732043	630860	1191958	837085	651850	883620	727123	1	1	811382	772769	631990	683586	498533	1-KETO-2-METHYLVALERATE	1-KETO-2-METHYLVALERATE [ C6 H11 O4, tgt=43.45, overall=43.45 ]			(170.16266, 42079.0)(171.16476, 4181.2407)	1.405
1D-<i>myo</i>-inositol 3-monophosphate	1	1	3774117	1	1	294373	3306090	3540171	289199	1	2777358	1	1	4301643	1	1	3901092	3238657	3815342	1	1-L-MYO-INOSITOL-1-P	1-L-MYO-INOSITOL-1-P [ C6H11O9P, tgt= ]			(259.01453, 4483.9336)(260.0147, 622.77)(241.00557, 267274.0)(242.00687, 92485.8)(279.04947, 1630.9313)(259.04294, 20372.55)(260.0466, 1258.27)(262.0501, 382.76)	1.406
1-O-galloyl-&beta;-D-glucose	1170253	463805	234418	323687	582801	202454	774121	304010	523358	1704178	399813	816870	950157	105119	1152188	196629	533868	237469	381006	391490	1-O-GALLOYL-BETA-D-GLUCOSE	1-O-GALLOYL-BETA-D-GLUCOSE [ C13 H16 O10, tgt=43.36, overall=43.36 ]			(333.07584, 11425.702)(336.07678, 2511.9424)(337.08783, 37587.797)(318.51794, 753.07324)(337.08743, 30801.291)(319.08472, 1202.9601)(352.98096, 3279.121)(337.91495, 9182.725)(339.06335, 6395.4053)	1.677
1-<i>O</i>-sinapoyl-&beta;-D-glucose	1	1	884353	1	1	1	1	1	1	1	223830	1	1	1	1	1	120944	1	230938	1	1-O-SINAPOYL-BETA-D-GLUCOSE	1-O-SINAPOYL-BETA-D-GLUCOSE [ C17H22O10, tgt= ]			(369.1205, 3244.3467)(369.1192, 12068.65)(370.1225, 890.53)(388.15408, 1867.9867)(391.0885, 7510.56)	6.322
1-palmitoyl-<i>sn</i>-glycerol 3-phosphate	293476	1	1	226413	1	195084	798090	1	210843	320185	556944	1	258323	129993	314193	1	624260	527984	795500	1	1-PALMITOYLGLYCEROL-3-PHOSPHATE	1-PALMITOYLGLYCEROL-3-PHOSPHATE [ C19 H37 O7 P, tgt=28.65, overall=28.65 ]			(390.2122, 31572.35)(391.21524, 5591.9)(435.67792, 13345.077)(413.76965, 13920.751)(414.21796, 2184.1755)	4.367
(20<i>R</i>,22<i>R</i>)-dihydroxycholesterol	125564	1	8296245	1	1	1	6584902	1	8482157	116648	6506652	8011453	127551	9063634	10028514	1	6441613	6257664	6976487	1	20A-20B-DIHYDROXY-CHOLESTEROL	20A-20B-DIHYDROXY-CHOLESTEROL [ C27 H46 O3, tgt=50.17, overall=50.17 ]			(418.34106, 3548.5166)(418.36157, 95355.14)(419.364, 9047.203)(424.3212, 4978.877)(425.3242, 502.95667)(426.33688, 15826.4795)(427.3401, 3786.4133)	8.8
2-[(2'-methylsulfanyl)ethyl]malate	446838	173898	1	1	181304	1	1	154036	1	484495	1	340847	469022	1	450351	1	1	1	1	163493	2-2-METHYLTHIOETHYLMALIC-ACID	2-2-METHYLTHIOETHYLMALIC-ACID [ C7 H10 O5 S, tgt=47.50, overall=47.50 ]			(206.02682, 10872.973)(190.01378, 2537.7563)(207.05032, 1573.6167)(234.0215, 581.12836)(212.00874, 54396.812)(214.00499, 1696.1823)	1.894
2,3',4,6-tetrahydroxybenzophenone	1	270317	1	1	227610	1	210629	1	162009	1	282588	1	1	1	1	1	1	218933	1	1	2346-TETRAHYDROXYBENZOPHENONE	2346-TETRAHYDROXYBENZOPHENONE [ C13 H10 O5, tgt= ]			(273.046, 7449.4663)(233.06113, 3413.5698)(268.10406, 23922.213)(269.1072, 6622.54)	1.571
L-2,3-dihydrodipicolinate	4104374	351435	4079871	3756924	342077	3348245	311758	3305247	5447673	632109	3302285	4196549	3680788	4133656	4589532	408633	154360	148531	203490	361604	23-dihydrodipicolinate	23-dihydrodipicolinate [ C7 H7 N O4, tgt=47.62, overall=47.62 ]			(169.03584, 9343.0205)(170.04652, 1507.0267)(153.7841, 6946.218)(171.0526, 4087.2148)(152.53856, 16331.462)(154.14859, 5763.168)(157.0503, 1556.91)(188.07736, 158270.4)(189.07887, 22401.598)(190.07617, 5552.61)(171.81888, 3395.1997)(172.89885, 3771.9324)(174.07002, 517.04333)(193.03555, 13479.965)(175.01953, 15370.789)(176.69023, 9614.497)(177.02205, 9803.505)	1.8337
(<i>S</i>)-2,3-dihydrodipicolinate	108775	127578	74404	143824	127149	229924	1	91172	233854	160497	120490	1	134452	140632	169439	113950	1	1	97398	1	2-3-DIHYDRODIPICOLINATE	2-3-DIHYDRODIPICOLINATE [ C7 H5 N O4, tgt=51.08, overall=51.08 ]			(170.15907, 28802.893)(171.19441, 7881.8706)(151.5182, 5080.703)(152.0162, 1834.2102)(169.03598, 3750.6426)(152.02007, 3486.6868)(187.39801, 54900.984)(168.05194, 236902.64)(169.38588, 54333.03)(170.2518, 39482.316)(172.0597, 4089.21)(190.37158, 5198.5757)(191.0133, 1567.39)(175.15222, 17473.674)	2.089
2,3-dimercaptopropan-1-ol	136572	119113	90373	1	1	1	118679	112525	1	185083	1	106477	154816	1	147893	134103	100275	1	1	99980	23-DIMERCAPTOPROPAN-1-OL	23-DIMERCAPTOPROPAN-1-OL [ C3 H8 O S2, tgt=64.51, overall=64.51 ]			(129.99565, 16567.076)(105.992355, 390.195)(130.58562, 9302.687)(131.0014, 7615.7954)(144.86821, 11515.961)(147.03246, 652.24335)(124.02493, 3825.55)(146.99455, 4483.5474)(130.97806, 475.675)	1.411
2,4,6-trinitrobenzene	94180	183204	146736	109204	182759	251739	1	174445	258214	437838	1	105106	130968	996670	80775	224431	1	1	1	106566	246-TRINITROBENZENE	246-TRINITROBENZENE [ C6 H3 N3 O6, tgt=54.47, overall=54.47 ]			(214.57814, 2168.4116)(216.7639, 1530.04)(217.0136, 583.49)(199.00246, 2218.2502)(200.00064, 533.93)(214.79218, 16701.482)(216.51799, 33662.26)(217.41655, 31622.457)(198.57216, 1203.7014)(233.04227, 3365.7197)(217.03654, 577.77496)(240.67152, 136241.9)(241.006, 74144.05)(222.98912, 2355.115)	1.595
(24<i>R</i>)-24-methylcycloarta-25-en-3-&beta;-ol	448086	241703	319854	428861	661337	372543	1	1	1	427022	1	1	535717	254297	515029	623200	1	1	249846	573728	24R-24-METHYLCYCLOARTA-825-DIEN-3-BET	24R-24-METHYLCYCLOARTA-825-DIEN-3-BET [ C31 H52 O, tgt=17.05, overall=17.05 ]			(440.40967, 11022.395)(441.41306, 1710.2025)(445.3686, 11093.87)(446.3718, 1873.73)	19.693
(2,6-difluoro-4-hydroxyphenyl)pyruvate	5790505	12539342	9432308	9634860	4718368	6363955	99543	386568	9753261	7445074	148130	2015910	3466055	7581788	5667453	8536914	152394	402056	74377	2719826	26-DIFLUORO-4-HYDROXYPHENYLPYRUVATE	26-DIFLUORO-4-HYDROXYPHENYLPYRUVATE [ C9 H5 F2 O4, tgt=59.36, overall=59.36 ]			(215.01746, 236291.27)(216.02074, 15375.978)(197.50885, 3122.575)(218.62634, 301935.34)(219.82968, 43213.438)(220.0302, 6174.47)(199.0213, 479.93)(234.04808, 1730.0726)(217.84778, 18508.422)(220.05562, 1905.9501)(241.4108, 1674.7981)	2.048
(<i>S</i>)-2-aceto-2-hydroxybutanoate	1803929	1	4721473	1	1	1	4402056	1	564274	4638335	4393869	1841320	5388315	361734	4967071	484256	4229004	3943009	4618051	1	2-ACETO-2-HYDROXY-BUTYRATE	2-ACETO-2-HYDROXY-BUTYRATE [ C6 H9 O4, tgt=71.22, overall=71.22 ]			(145.05074, 29683.566)(146.0559, 440.97998)(127.03927, 26183.033)(128.0435, 201.655)(148.0612, 18248.174)(149.0647, 375.27)(130.05075, 31953.738)(131.85506, 566.626)(133.0599, 160.09)(166.0876, 227690.75)(167.09076, 20980.0)(147.07703, 9293.018)(170.04665, 244.63399)(151.03624, 194.89)	7.06775
(<i>S</i>)-2-acetolactate	1	1	1	1	1	1	1	1	1	1	1	206559	1	1	124450	1	1	1	1	1	2-ACETO-LACTATE	2-ACETO-LACTATE [ C5 H7 O4, tgt= ]			(131.0349, 2606.29)(134.0464, 6158.72)(151.0765, 72500.77)(152.0792, 6605.94)	2.406
2-(&alpha;-hydroxyethyl)thiamine diphosphate	79034	1	1	1	1	1	1	1	1	96852	1	1	112696	1	106226	1	1	1	1	1	2-ALPHA-HYDROXYETHYL-THPP	2-ALPHA-HYDROXYETHYL-THPP [ C14 H20 N4 O8 P2 S, tgt=24.06, overall=24.06 ]			(466.04333, 1131.265)(467.041, 1499.5)(451.0458, 690.095)(467.04135, 1396.7965)(449.05664, 4891.803)(471.0846, 754.29)	1.536
2-amino-3-carboxymuconate-6-semialdehyde	796110	587546	1933551	1406326	317337	649938	2499918	290158	345525	2319465	123746	327783	380108	2181183	345146	1115057	211142	1	1572130	1114288	2-AMINO-3-3-OXOPROP-2-ENYL-BUT-2-ENEDI	2-AMINO-3-3-OXOPROP-2-ENYL-BUT-2-ENEDI [ C7 H5 N O5, tgt=49.83, overall=49.83 ]			(185.01712, 218.11751)(166.3408, 296.92334)(186.17654, 1980.7557)(167.90611, 5199.4683)(170.22487, 11858.3545)(171.02945, 2445.205)(201.9966, 14194.612)(203.65475, 602.0)(184.87971, 799.73755)(188.0533, 111.37)(208.00655, 807.8633)(188.99586, 3651.3315)(188.9917, 587.2845)	2.34289
<i>(2S)</i>-2-amino-3-oxo-4-phosphooxybutanoate	1	888846	469264	879650	794200	644168	1	796214	809187	771500	1	1	315081	599677	460924	499602	1	1	1	1	2-AMINO-3-OXO-4-PHOSPHONOOXYBUTYRATE	2-AMINO-3-OXO-4-PHOSPHONOOXYBUTYRATE [ C4 H6 N O7 P, tgt=8.58, overall=8.58 ]			(214.00525, 862.3)(212.00977, 6987.0913)(214.51636, 21294.781)(215.8201, 12251.117)(216.0196, 2446.51)	2.413
2-amino-4-carboxypyrimidine	19328660	20589584	16092609	15112455	22623892	17599466	6899457	10820987	9033361	7937888	8910824	1568432	14607245	9835586	12740759	7840828	9560272	12775385	5898496	27589240	2-AMINO-4-CARBOXYPYRIMIDINE	2-AMINO-4-CARBOXYPYRIMIDINE [ C5 H4 N3 O2, tgt=59.19, overall=59.19 ]			(138.71988, 5252.056)(141.03986, 662.94995)(124.02508, 4311.8237)(139.83687, 3010.28)(125.84029, 2209.164)(157.40376, 2208.9983)(138.15591, 704564.4)(139.39366, 35242.082)(140.0595, 3849.62)(166.0335, 1187.7)(145.15724, 2247.283)(146.014, 1876.4)	1.839
2-bromoporphobilinogen	201543	174388	172683	163545	122791	93696	88579	145160	224549	210285	186513	140851	150873	151997	187119	1	260311	281658	428592	1	2-BROMOPORPHOBILINOGEN	2-BROMOPORPHOBILINOGEN [ C10 H12 Br N2 O4, tgt=50.92, overall=50.92 ]			(305.12723, 3325.3093)(306.00107, 750.44904)(306.99982, 2336.194)(288.98557, 2465.64)(306.33292, 23538.1)(307.0009, 3054.4275)(307.00485, 1303.895)(288.6715, 6339.7124)(288.41888, 3770.9358)(288.99084, 1243.7731)(289.9897, 1076.185)(321.0388, 8463.64)(322.0502, 489.32)(303.94427, 2011.7947)(326.98972, 1801.798)(330.4522, 1409.6001)(330.86423, 2390.024)(333.99326, 3542.4277)(311.85394, 444.3687)(3…	1.444
2-carboxy-D-arabinitol	1346102	1286732	786056	961558	736241	798640	734224	858655	1108723	1	787604	1230109	1150319	1	1389457	722956	760432	648435	765883	623554	2-CARBOXY-D-ARABINITOL	2-CARBOXY-D-ARABINITOL [ C6 H11 O7, tgt=34.80, overall=34.80 ]			(196.05074, 380.60336)(181.04564, 1458.2682)(213.30241, 17503.346)(214.7555, 2880.4338)(218.0999, 880.17)(197.08136, 4326.9365)(198.0836, 143.54)(218.0424, 275.71)(205.0468, 140.09)	5.115
2-carboxy-D-arabinitol 1-phosphate	199843	1	180408	231494	1	196150	1	96476	345660	499550	1	278157	161347	261293	269228	326364	254169	1	342855	1	2-CARBOXY-D-ARABINITOL-1-PHOSPHATASE	2-CARBOXY-D-ARABINITOL-1-PHOSPHATASE [ C6 H10 O10 P, tgt=85.06, overall=85.06 ]			(275.01843, 29127.525)(261.0067, 3630.1873)(294.03864, 557.12)(277.03342, 111602.75)(278.0368, 8635.876)(299.00073, 4346.83)(300.0044, 360.41)	1.844
2-<i>cis</i>,6-<i>trans</i>-farnesol	1	1	1	1	1	1	1111171	1	1	1	2110130	1	1	1	1	1	2466537	1362949	1	1	2-CIS6-TRANS-FARNESOL	2-CIS6-TRANS-FARNESOL [ C15H26O, tgt= ]			(226.2163, 1376.06)(240.23257, 45655.484)(241.23567, 5914.457)(249.20569, 1293.3575)	17.079
2-C-methyl-D-erythritol-2,4-cyclodiphosphate	117726	130035	113807	82363	1	1	1	120240	1	1	1	110245	126073	1	125669	142936	1	1	1	110168	2C-METH-D-ERYTHRITOL-CYCLODIPHOSPHATE	2C-METH-D-ERYTHRITOL-CYCLODIPHOSPHATE [ C5 H10 O9 P2, tgt=45.20, overall=45.20 ]			(276.81076, 1092.6718)(259.47003, 543.9275)(259.9656, 772.41)(280.0018, 399.29)(258.9831, 7520.56)(259.9882, 1345.69)(278.5057, 404.29498)(300.9758, 412.195)(283.97125, 735.4263)(284.9668, 508.64142)	1.405
2-C-methyl-D-erythritol 4-phosphate	90029	197144	99378	1	1	1	207915	79021	207489	1	1	1	1	133449	104262	1	202698	178588	187576	1	2-C-METHYL-D-ERYTHRITOL-4-PHOSPHATE	2-C-METHYL-D-ERYTHRITOL-4-PHOSPHATE [ C5 H11 O7 P, tgt=20.04, overall=20.04 ]			(217.0344, 899.75)(216.53714, 551.385)(198.02756, 6996.3774)(199.02365, 1643.5975)(234.06151, 6519.8335)(236.0636, 14822.705)(214.17378, 6254.9414)(224.0111, 366.92)	2.1045
<i>trans</i>-2-coumarate	1	1	1	1	1	1	20344014	1	1	1	17771124	1	1	1	1	13168024	14703764	7631078	15806401	1	2-COUMARATE	2-COUMARATE [ C9H7O3, tgt= ]			(163.03983, 189982.89)(164.04301, 16786.4)(165.0487, 444.18668)(145.0284, 79.09)(147.04317, 2691.16)(167.071, 331.85)(189.0398, 115.48)	3.599
2-dehydropantoate	1	1	4721473	1	1	1	4402056	1	1	4638335	4393869	1	5388315	1	4967071	1	4229004	3943009	4618051	1	2-DEHYDROPANTOATE	2-DEHYDROPANTOATE [ C6H9O4, tgt= ]			(145.05089, 41300.25)(146.05502, 490.67886)(127.04002, 36215.035)(128.0435, 201.655)	8.76
2-dehydropantolactone	675954	547984	745917	669944	564919	576064	665981	568427	133371	717158	648579	867391	699111	782771	760043	727905	646393	571182	529276	518306	2-DEHYDROPANTOYL-LACTONE	2-DEHYDROPANTOYL-LACTONE [ C6 H8 O3, tgt=56.26, overall=56.26 ]			(130.04974, 5686.1816)(131.0532, 285.43)(111.047, 3088.96)(112.0507, 334.53)(151.03569, 44802.477)(152.03711, 7395.4385)(153.03427, 5692.3525)	1.406
2-deoxyglucose 6-phosphate	1643402	1	382430	1878134	386626	257436	357100	222304	2392527	423377	368560	133355	219672	1970597	146590	159136	1658173	423708	1572436	454616	2-DEOXYGLUCOSE-6-PHOSPHATE	2-DEOXYGLUCOSE-6-PHOSPHATE [ C6 H11 O8 P, tgt=47.20, overall=47.20 ]			(245.0277, 1003.05)(228.30795, 1339.8815)(229.02481, 682.155)(248.0448, 222.39)(228.22404, 1510.882)(261.13928, 22703.611)(262.3078, 2494.54)(263.0569, 6221.755)(244.0502, 642.055)(266.01764, 8524.807)(267.01477, 8036.23)(268.0163, 1182.6666)(249.0011, 1667.05)	1.61
(2<i>R</i>,3<i>S</i>)-3-isopropylmalate	386875	1	1427356	799138	1	344994	1	109950	2011803	220074	1	79209	172499	1797517	140704	146503	1	1	1	1	2-D-THREO-HYDROXY-3-CARBOXY-ISOCAPROATE	2-D-THREO-HYDROXY-3-CARBOXY-ISOCAPROATE [ C7 H10 O5, tgt=47.60, overall=47.60 ]			(156.04297, 94401.516)(157.0463, 7408.255)(158.04108, 8501.615)(199.21208, 5107.02)(200.24956, 1366.992)(157.04958, 7238.0547)(175.06009, 2190.585)(180.0386, 442.52)(174.07712, 3203.62)	2.079
2-fluorobenzoate	344737	457146	215881	1	708661	331998	121946	200167	229008	574388	131559	1	266947	210736	282358	139728	1	1	1	92600	2-FLUOROBENZOATE	2-FLUOROBENZOATE [ C7 H4 F O2, tgt=40.81, overall=40.81 ]			(140.02528, 1249.47)(142.73425, 8203.4)(123.42232, 1954.7019)(142.05307, 4474.2314)(144.00204, 8165.965)(145.01181, 313.095)	1.93117
2-furoate	540025	1068999	669721	834772	587012	638476	654936	742491	962321	717330	569399	691922	589126	700499	471791	719244	655857	603722	580442	567856	2-FUROATE	2-FUROATE [ C5 H3 O3, tgt=52.05, overall=52.05 ]			(111.00924, 34906.684)(112.007385, 34531.723)(113.00905, 1009.90247)(114.017075, 21437.252)(131.29648, 5820.342)(133.05132, 980.384)(113.034874, 12028.367)(115.03942, 2177.7974)(138.6076, 682.52203)	2.039
2-hydroxy-4-carboxypyrimidine	1	279199	1	1	170042	1	284727	167233	1	207633	109196	1	1	1	1	1	1	1	1	242210	2-HYDROXY-4-CARBOXYPYRIMIDINE	2-HYDROXY-4-CARBOXYPYRIMIDINE [ C5H3N2O3, tgt= ]			(143.0192, 14024.66)(144.022, 592.64)(140.86028, 1901.9349)(125.30465, 383188.06)(127.02447, 693094.5)(159.30347, 2331.25)(141.03972, 5822.408)(167.01424, 2112.536)	1.48925
2'-hydroxydaidzein	903200	1	638839	664213	1	257267	1	450146	522147	1045972	1	174079	838851	874404	609264	606569	1	1	1	1	2-HYDROXYDAIDZEIN	2-HYDROXYDAIDZEIN [ C15 H10 O5, tgt=70.89, overall=70.89 ]			(274.34433, 1871.7344)(288.08734, 1829.2942)(289.08188, 444.31665)(273.17444, 7067.3354)(274.08337, 2988.3477)(294.03815, 159.07)(277.03333, 113762.25)(278.03668, 8809.33)(279.03848, 10867.037)	1.893
2-hydroxyformononetin	1	1	1	1	1	1	1	1	1	1	1	1349778	1247029	1	1	1	1	1	1	1	2-HYDROXYFORMONONETIN	2-HYDROXYFORMONONETIN [ C16H12O5, tgt= ]			(303.1025, 47.92)(285.09576, 1490.9199)(289.0536, 10854.925)	4.208
2-hydroxysuccinamate	6403459	362491	129380	434833	363436	393058	247762	477714	395715	523907	140411	411941	637252	5560659	788368	438111	274584	220295	198245	468091	2-HYDROXYSUCCINAMATE	2-HYDROXYSUCCINAMATE [ C4 H6 N O4, tgt=47.58, overall=47.58 ]			(133.03252, 2989.4448)(117.77633, 8417.4)(137.04637, 5692.956)(119.0348, 4295.46)(152.06883, 8887.377)(153.0682, 980.55005)(135.51108, 114629.375)(135.06033, 32297.809)(136.06343, 178759.52)(157.97101, 4519.1777)(138.0082, 3070.0967)	1.899
4-methyl-2-oxopentanoate	245170	177269	1	1	1	1	257141	1	1	223500	271621	234327	261971	1	282814	1	216885	203708	242875	1	2K-4CH3-PENTANOATE	2K-4CH3-PENTANOATE [ C6 H9 O3, tgt=45.06, overall=45.06 ]			(115.05466, 9595.722)(130.06563, 11581.199)(131.28586, 2244.9949)(133.08511, 2679.9978)	4.209
2-oxoadipate	321821	334336	222558	229616	166059	163847	75085	219810	612370	169575	1	255380	165163	445837	288214	261411	110525	1	72310	193095	2K-ADIPATE	2K-ADIPATE [ C6 H6 O5, tgt=47.56, overall=47.56 ]			(158.29556, 6891.228)(160.02245, 8069.09)(141.81343, 2559.2012)(159.02707, 10449.493)(180.06422, 1345.4366)(160.55118, 5594.6377)(185.01651, 655.47595)(166.64641, 3384.0383)(168.01268, 722.31494)	1.68175
(<i>S</i>)-3-methyl-2-oxopentanoate	245170	177269	1	1	1	1	257141	1	1	223500	271621	234327	261971	1	282814	1	216885	203708	242875	1	2-KETO-3-METHYL-VALERATE	2-KETO-3-METHYL-VALERATE [ C6 H9 O3, tgt=45.06, overall=45.06 ]			(115.05466, 9595.722)(130.06563, 11581.199)(131.28586, 2244.9949)(133.08511, 2679.9978)	4.209
6-amino-2-oxohexanoate	8200191	6676535	143481	154016	6036221	7055426	113490	387791	148878	7458523	2948171	5793642	155388	203799	9418132	190461	4068068	3084756	98649	459460	2-KETO-6-AMINO-CAPROATE	2-KETO-6-AMINO-CAPROATE [ C6 H11 N O3, tgt=49.54, overall=49.54 ]			(147.0768, 6752.0894)(150.8446, 712.65)(164.10744, 17714.5)(165.1125, 7367.49)(168.06384, 7332.164)(151.05702, 124334.71)(152.11281, 8015.564)(152.05911, 1391.09)	2.257
2-oxoglutaramate	24800796	23137088	1698129	25820988	25930332	23118756	21342004	1427941	1718927	26259690	530282	22095528	21463972	26246892	26399684	21866508	23221820	488904	1	21658732	2-KETO-GLUTARAMATE	2-KETO-GLUTARAMATE [ C5 H6 N O4, tgt=47.14, overall=47.14 ]			(168.41972, 3294.5159)(170.16553, 4640.557)(172.0294, 1409.24)(127.02478, 1284304.9)(128.02629, 192726.86)(129.02298, 158669.78)(145.03484, 12242.278)(146.03654, 775.4133)(147.03279, 717.70996)(165.40553, 1869.64)(147.0433, 377.4)(149.0445, 483.17)(151.26697, 5910.144)(152.016, 1536.3158)(147.72751, 10929.899)	1.41
2-oxoglutarate	385725	464330	747340	1	397451	292185	140163	200420	180549	1	135947	83569	307411	1	138499	939445	85855	1	747028	766337	2-KETOGLUTARATE	2-KETOGLUTARATE [ C5 H4 O5, tgt=68.39, overall=68.39 ]			(144.004, 10680.873)(145.01259, 400.815)(130.00464, 9068.526)(145.01314, 3885.3245)(130.00754, 1872.955)(145.0349, 6903.5474)(146.03656, 472.91803)(147.03276, 493.77335)(168.00055, 2415.2932)(169.00145, 274.402)	1.396
phylloquinone	547128	344329	347539	411029	550284	382810	524835	274045	961232	512508	839072	333362	563836	439009	579146	519355	395967	367318	998163	499215	2-METHYL-3-PHYTYL-14-NAPHTHOQUINONE	2-METHYL-3-PHYTYL-14-NAPHTHOQUINONE [ C31 H46 O2, tgt=62.37, overall=62.37 ]			(432.3474, 29207.643)(433.35046, 7485.16)(434.3551, 272.73)(469.38654, 10918.911)(470.3898, 1645.6406)	17.2304
(<i>E</i>)-2-methylpropanal-oxime	1	1	1	1	1	1	1147272	1	1	1	1	1	1	1	1	1	1	1	1	1	2-METHYLPROPANAL-OXIME	2-METHYLPROPANAL-OXIME [ C4 H9 N O, tgt= ]			(110.0604, 41191.73)(111.0631, 1276.03)	2.47
2-O-caffeoylglucarate	1	189075	1	1	141475	1	197104	1	1	1	454440	1	1	1	1	1	1	322860	1	175011	2-O-CAFFEOYLGLUCARATE	2-O-CAFFEOYLGLUCARATE [ C15 H14 O11, tgt=0.77, overall=0.77 ]			(353.03903, 10206.675)(397.06393, 2386.3933)(377.0477, 1397.8398)	1.67
2-oxoindole-3-acetate	280631	1	1	1	1	1	285914	1	1	256304	285593	270475	169084	1	306801	1	210030	202527	235518	1	2-OXINDOLE-3-ACETIC-ACID	2-OXINDOLE-3-ACETIC-ACID [ C10 H8 N O3, tgt=21.46, overall=21.46 ]			(213.0424, 1927.1)(177.0553, 742.44495)(190.0508, 5020.32)(199.04515, 532.435)(190.17671, 12233.839)	4.219
(2-oxindol-3-yl)acetyl-L-aspartate	313104	83366	2844040	2815226	1678420	152629	322876	174449	2782165	506812	1	1992778	440692	2950260	390111	135211	359306	270217	400589	1234896	2-OXINDOLE-3-ACETYL-ASP	2-OXINDOLE-3-ACETYL-ASP [ C14 H12 N2 O6, tgt=67.17, overall=67.17 ]			(309.07303, 6724.0054)(287.05542, 64172.59)(288.63553, 12092.241)(289.06143, 2382.7583)(307.08353, 33470.0)(308.08392, 4216.54)(291.08417, 3843.327)(324.91306, 2296.5198)(304.09912, 3504.8901)(331.20648, 1476.2992)	5.11468
5-(methylsulfanyl)-2-oxopentanoate	412269	1	1	1	186092	1	1	1	147100	310975	1	256087	1	1	440994	1	1	1	150405	1	2-OXO-5-METHYLTHIOPENTANOIC-ACID	2-OXO-5-METHYLTHIOPENTANOIC-ACID [ C6 H9 O3 S, tgt=58.28, overall=58.28 ]			(161.02715, 610.63)(143.01852, 11125.991)(144.02223, 589.75665)(145.0166, 1022.91003)(165.0334, 1243.017)(166.03336, 845.45)(147.0272, 3228.89)(185.0169, 692.565)(168.00159, 1898.71)(169.0015, 291.875)	1.589
2-oxobutanoate	346546	298915	301003	308450	314579	277845	285404	280690	386283	349993	242910	283913	287823	334884	376198	277306	316396	269529	290638	267211	2-OXOBUTANOATE	2-OXOBUTANOATE [ C4 H5 O3, tgt=34.70, overall=34.70 ]			(107.04442, 15146.053)(128.4736, 535124.06)(128.19179, 234943.23)(129.02232, 196917.6)(110.00951, 344893.12)	1.405
2-oxohexanoate	245170	177269	1	1	1	1	257141	1	1	223500	271621	234327	261971	1	282814	1	216885	203708	242875	1	2-OXOHEXANOATE	2-OXOHEXANOATE [ C6 H9 O3, tgt=45.06, overall=45.06 ]			(115.05466, 9595.722)(130.06563, 11581.199)(131.28586, 2244.9949)(133.08511, 2679.9978)	4.209
2-oxosuccinamate	657643	662403	1	1808884	730503	393849	598945	630616	956552	126096	534810	616814	146478	749517	1	551315	578978	586993	564238	626471	2-OXOSUCCINAMATE	2-OXOSUCCINAMATE [ C4 H4 N O4, tgt=44.39, overall=44.39 ]			(113.93683, 4929.9536)(115.28496, 3126.6875)(116.01436, 1771.958)(113.72741, 10664.243)(115.68186, 2953.1868)(116.0152, 2730.62)(148.04808, 2451.825)(132.10672, 2855.2058)(133.04445, 586.09503)(139.75458, 933.55835)(140.0041, 788.27)	2.7299
2-phospho-D-glycerate	827150	992969	807867	1007020	1228301	920472	652613	943296	742441	863324	1	582714	664744	906471	865655	630319	761418	1	742224	959060	2-PG	2-PG [ C3 H4 O7 P, tgt=15.01, overall=15.01 ]			(182.96361, 58783.652)(166.03767, 3028.5498)(166.95973, 2849.8372)(188.99176, 1145.7173)(168.43344, 3042.2136)(170.977, 1319.885)(203.00714, 1492.4758)	1.406
2-phospho-4-(cytidine 5'-diphospho)-2-C-methyl-D-erythritol	134785	586071	271412	388423	169246	140577	352319	225561	363267	244112	1016093	97201	200659	201277	116920	232581	859346	467725	581338	205535	2-PHOSPHO-4-CYTIDINE-5-DIPHOSPHO-2-C-MET	2-PHOSPHO-4-CYTIDINE-5-DIPHOSPHO-2-C-MET [ C14 H22 N3 O17 P3, tgt=28.26, overall=28.26 ]			(578.9955, 33730.8)(579.9979, 2879.0737)(615.03613, 14054.348)(616.03925, 1707.4966)(599.1356, 2256.633)(600.0573, 1524.38)(601.0561, 262.04)	6.16725
(2<i>E</i>,6<i>E</i>)-farnesal	1	1	1915653	2031942	1	1	321573	1	4738625	1	726935	242490	1	6228458	1	4358479	325863	852431	1	1	2-TRANS6-TRANS-FARNESAL	2-TRANS6-TRANS-FARNESAL [ C15H24O, tgt= ]			(221.18645, 54200.98)(222.1902, 16802.72)(221.18721, 177450.38)(222.19032, 27194.357)(223.1922, 1448.04)(203.18326, 364.81)(245.18134, 2676.4055)(246.38095, 707.964)(228.17084, 1226.2001)	1.58
(<i>2E,6E</i>)-farnesol	1	1	1	1	1	1	1111171	1	1	1	2110130	1	1	1	1	1	2466537	1362949	1	1	2-TRANS6-TRANS-FARNESOL	2-TRANS6-TRANS-FARNESOL [ C15H26O, tgt= ]			(226.2163, 1376.06)(240.23257, 45655.484)(241.23567, 5914.457)(249.20569, 1293.3575)	17.079
2-undecanone	508815	420018	214817	297822	141516	219265	1	508553	208391	594811	231632	276312	283903	191868	278285	173942	513707	1	439882	235470	2-UNDECANONE	2-UNDECANONE [ C11 H22 O, tgt=48.14, overall=48.14 ]			(193.15927, 9510.389)(194.16248, 1042.8625)(175.14873, 11549.829)(176.15233, 827.578)	7.18383
3-[(2'-methylsulfanyl)ethyl]malate	446838	173898	1	1	181304	1	1	154036	1	484495	1	340847	469022	1	450351	1	1	1	1	163493	3-2-METHYLTHIOETHYLMALIC-ACID	3-2-METHYLTHIOETHYLMALIC-ACID [ C7 H10 O5 S, tgt=47.50, overall=47.50 ]			(206.02682, 10872.973)(190.01378, 2537.7563)(207.05032, 1573.6167)(234.0215, 581.12836)(212.00874, 54396.812)(214.00499, 1696.1823)	1.894
gossypetin	556125	306676	369153	365062	380723	1	269117	362898	433310	585509	373960	249222	399312	355719	548626	333016	227803	230559	295016	1	334578-HEXAHYDROXYFLAVONE	334578-HEXAHYDROXYFLAVONE [ C15 H9 O8, tgt=40.67, overall=40.67 ]			(321.03857, 1236.5533)(301.14142, 4893.6)(303.02084, 1291.67)(320.25055, 1289.466)(322.05582, 699.5475)(305.0322, 2783.8699)(336.78778, 23929.332)(337.78885, 6567.319)(338.73062, 3373.3398)(318.0623, 711.37)(319.0491, 738.93)	1.62
3,3',4',5,7-pentahydroxy-8-methoxyflavone	1	1	1	1	1	223151	1	1	260576	248622	129342	1	1	332338	1	1	1	1	1	1	33457-PENTAHYDROXY-8-METHOXYFLAVON	33457-PENTAHYDROXY-8-METHOXYFLAVON [ C16H11O8, tgt= ]			(315.03076, 143.47)(333.85947, 3726.2102)(319.0493, 1996.2201)(349.88654, 3513.532)(333.27582, 12133.902)(335.87704, 4215.0703)(336.0317, 445.04)	1.829
3,6,7-trimethylquercetagetin	1	1	1	1	1	1	165251	1	1	1	241150	692218	1	360150	1	1	156809	312284	431471	1	345-TRIHYDROXY-367-TRIMETHOXYFLAVO	345-TRIHYDROXY-367-TRIMETHOXYFLAVO [ C18H16O8, tgt= ]			(364.09583, 5158.8916)(365.1049, 19574.045)(365.1036, 13389.71)(344.09128, 2875.9934)(360.1057, 394.9)(383.0804, 18666.664)(384.08398, 2902.27)(367.0756, 341.90665)	1.586
protocatechuate	346562	868465	499689	441150	299708	442013	336432	1	394170	458883	51783	285028	413234	450541	457094	1	167639	184375	120889	584895	3-4-DIHYDROXYBENZOATE	3-4-DIHYDROXYBENZOATE [ C7 H5 O4, tgt=39.52, overall=39.52 ]			(154.74669, 4561.5825)(155.01958, 2686.41)(175.06006, 3459.815)(153.03984, 2639.3367)(176.01157, 80450.43)(177.01987, 8738.383)(178.0106, 4740.4136)(160.0029, 829.65)	1.598
3,4-dihydroxyphenylacetaldehyde	569668	420841	1	1	141264	1	1398891	1	164231	1	846370	365551	1	1	1	1	1	1	886839	185353	34-DIHYDROXYPHENYLACETALDEHYDE	34-DIHYDROXYPHENYLACETALDEHYDE [ C8 H8 O3, tgt=77.24, overall=77.24 ]			(153.04921, 5556.99)(154.04964, 2878.37)(136.8275, 16193.34)(137.38878, 170073.77)(139.0582, 21126.145)(170.08221, 22458.33)(171.0849, 1352.24)(155.96895, 8126.326)(159.02925, 4664.0723)	2.815
3-(3,4-dihydroxyphenyl)pyruvate	191165	230220	158205	1	220717	1	150285	220539	1	162655	537455	173182	450134	1	445548	202836	361668	451287	363903	278149	34-DIHYDROXYPHENYLPYRUVATE	34-DIHYDROXYPHENYLPYRUVATE [ C9 H7 O5, tgt=43.43, overall=43.43 ]			(199.50311, 4567.549)(200.04529, 5915.6777)(177.02211, 10615.71)(200.71342, 869.0267)(201.0433, 151.65)(217.06836, 496.38)(198.05559, 1667.2524)(219.02754, 208757.92)(220.4657, 15244.692)(221.46588, 10028.235)(222.02983, 6412.4165)(204.02017, 6418.809)(205.02153, 838.00287)	1.642
adenosine 3',5'-bisphosphate	662161	1603185	1072658	1099610	816224	690680	1	985523	1032194	773781	1	524466	903742	772872	590219	1045211	371895	1	1	718128	3-5-ADP	3-5-ADP [ C10 H11 N5 O10 P2, tgt=32.57, overall=32.57 ]			(423.007, 37465.582)(424.01004, 3420.4333)(404.9962, 206.32)(441.01935, 4118.77)(423.00943, 31777.96)(424.01245, 2476.9348)(446.98938, 2094.0273)	2.06
theobromine	1482169	1492335	1	1	1541502	1	4133254	1	1	1	4034750	1	1	434640	1604435	1	3965624	3844017	1	1	3-7-DIMETHYLXANTHINE	3-7-DIMETHYLXANTHINE [ C7 H8 N4 O2, tgt=80.11, overall=80.11 ]			(182.73714, 7913.053)(164.39046, 6400.533)(166.0656, 126.77)(184.0742, 195.93)(163.06155, 72931.445)(164.06503, 4410.725)(200.1022, 1620.55)(180.08765, 5643.1953)(203.05403, 24369.977)(204.0563, 1475.585)(188.0451, 884.08)	7.66235
3-aminopropyl-methyl-phosphinate	304971	598342	364495	506979	550058	387931	456168	559095	506251	317704	638037	1015833	151524	322461	1382515	447603	414980	598662	529333	694171	3-AMINOPROPYL-METHYL-PHOSPHINATE	3-AMINOPROPYL-METHYL-PHOSPHINATE [ C4 H12 N O2 P, tgt=49.86, overall=49.86 ]			(137.70645, 9254.065)(119.04961, 7424.1304)(120.0544, 1087.14)(141.5758, 503.925)(125.071335, 2738.5479)(160.10692, 5388.5166)(163.06061, 1726.7466)(144.74832, 8429.875)(145.0507, 2080.735)	2.44185
3-&beta;-D-galactosyl-sn-glycerol	429525	146406	363572	335331	1783862	1	2021910	321273	490078	433169	511309	244911	598061	421295	408667	445499	181287	1893463	163753	133357	3-B-D-GALACTOSYL-SN-GLYCEROL	3-B-D-GALACTOSYL-SN-GLYCEROL [ C9 H18 O8, tgt=47.21, overall=47.21 ]			(256.82123, 6819.1797)(258.11102, 9015.287)(237.01633, 3886.2112)(238.00186, 1814.5735)(257.11377, 9536.804)(258.11102, 19266.236)(259.1214, 1900.41)(238.09341, 3861.65)(276.14554, 1027.5751)(256.12845, 5683.138)(278.2979, 4712.596)(259.07535, 9560.183)(260.08725, 4858.5234)	3.1113
glucomalcommin	656888	1	1	1	1	1	1	207458	1	836271	1	389904	576486	1	1076607	1	1	1	1	1	3-BENZOYLOXYPROPYL-GLUCOSINOLATE	3-BENZOYLOXYPROPYL-GLUCOSINOLATE [ C17 H22 N O11 S2, tgt=44.58, overall=44.58 ]			(481.07788, 1611.835)(463.0666, 8392.029)(465.04163, 8673.285)(466.04333, 564.88)(467.04126, 708.275)(487.0605, 801.88)(463.06757, 4780.87)(499.11493, 15578.295)(505.037, 265.57)	1.686
allopregnanolone	1	1	1	1	1	1	1	1	1	1	1883421	1	1	1	1	1	1414376	1337841	1	1	3-BETA-HYDROXY-5-ALPHA-PREGNANE-20-ONE	3-BETA-HYDROXY-5-ALPHA-PREGNANE-20-ONE [ C21 H34 O2, tgt= ]			(301.252, 351.97)(304.2611, 30970.36)(305.2641, 4188.6)(304.26172, 24847.99)(305.26483, 2798.49)(306.2767, 33941.5)(341.304, 2740.4668)(318.2772, 48758.51)(319.28024, 9037.68)	20.033
(2<i>S</i>)-2-isopropylmalate	386875	1	1427356	799138	1	344994	1	109950	2011803	220074	1	79209	172499	1797517	140704	146503	1	1	1	1	3-CARBOXY-3-HYDROXY-ISOCAPROATE	3-CARBOXY-3-HYDROXY-ISOCAPROATE [ C7 H10 O5, tgt=47.60, overall=47.60 ]			(156.04297, 94401.516)(157.0463, 7408.255)(158.04108, 8501.615)(199.21208, 5107.02)(200.24956, 1366.992)(157.04958, 7238.0547)(175.06009, 2190.585)(180.0386, 442.52)(174.07712, 3203.62)	2.079
3-carboxy-4-methoxy-N-methyl-2-pyridone	724192	242615	207631	256416	247529	219791	1	337664	304318	384976	1	551821	637328	250779	880104	198716	1	152627	1	188889	3-CARBOXY-4-METHOXY-N-METHYL-2-PYRIDONE	3-CARBOXY-4-METHOXY-N-METHYL-2-PYRIDONE [ C8 H8 N O4, tgt=52.92, overall=52.92 ]			(165.03323, 1249.5226)(206.04062, 854.40283)(167.98872, 133656.44)(168.98988, 25441.576)(170.05096, 20145.695)(204.0867, 164.37)(183.0511, 19712.617)(184.04968, 3027.2598)(191.03885, 1704.3049)(183.53853, 2256.8774)(187.07921, 25033.486)	1.95017
3-deazaadenine	1276831	784594	1	1	1	1	705986	1	1	1596669	3195161	2991094	1465964	358007	4451252	306707	844256	2585772	683548	1	3-DEAZAADENINE	3-DEAZAADENINE [ C6 H7 N4, tgt=83.80, overall=83.80 ]			(136.07462, 80482.64)(137.07802, 5060.851)(156.10205, 11768.9)(157.1049, 798.52)(160.3937, 1239.7089)(163.0608, 5306.9526)	2.127
3-dehydroshikimate	1860228	1443779	1578926	614243	720574	771208	3746852	831573	1206521	1083146	3063602	1738534	1591742	588162	2087778	1397028	2953836	3461754	3759057	1767059	3-DEHYDRO-SHIKIMATE	3-DEHYDRO-SHIKIMATE [ C7 H7 O5, tgt=55.44, overall=55.44 ]			(171.42905, 38369.35)(172.15411, 3942.6274)(154.39458, 1803.5836)(155.01974, 3638.564)(174.04582, 1152.7275)(157.03804, 920.9033)(192.83968, 1066.0769)(193.071, 2934.89)(172.51024, 1868.2672)(198.02841, 2516.0593)(176.01166, 54533.363)(177.02101, 7861.191)	1.876
5-enolpyruvoyl-shikimate 3-phosphate	1	1	1	1	1	1	213645	1	1	1	334606	1	1	1	1	1	1	251031	214471	1	3-ENOLPYRUVYL-SHIKIMATE-5P	3-ENOLPYRUVYL-SHIKIMATE-5P [ C10 H9 O10 P, tgt= ]			(306.99796, 28669.424)(308.00098, 2220.0798)(321.01328, 8963.232)(328.97687, 661.36)	2.154
3-<i>all trans</i>-hexaprenyl-4,5-dihydroxybenzoate	1526861	1028455	1205898	1655062	2583742	1355063	115050	128569616	1177417	1355231	389240	1005215	2316994	1018798	1615947	2443679	93227080	505745	103005560	386915	3-HEXAPRENYL-45-DIHYDROXYBENZOATE	3-HEXAPRENYL-45-DIHYDROXYBENZOATE [ C37 H53 O4, tgt=61.08, overall=61.08 ]			(561.8976, 4141.455)(548.89185, 2116.75)(549.4014, 147.13)(548.3923, 20256.82)(549.3949, 2606.89)(580.0591, 444914.75)(580.428, 108044.7)(581.4185, 60838.12)(582.42065, 8173.58)(566.69, 6017.8555)(584.81586, 1646.7443)(585.377, 715.565)(566.3726, 1678.11)	18.1454
3-<i>all trans</i>-hexaprenyl-4-hydroxy-5-methoxybenzoate	5386915	4009535	4330408	5600829	7205419	4782585	1212704	3208119	4285287	5066416	1403466	3991416	7187992	3809031	5751928	7541927	1144017	162766080	1899104	1	3-HEXAPRENYL-4-HYDROXY-5-METHOXYBENZOATE	3-HEXAPRENYL-4-HYDROXY-5-METHOXYBENZOATE [ C38 H55 O4, tgt=63.34, overall=63.34 ]			(576.2006, 201990.38)(579.41034, 267866.16)(580.4128, 54166.938)(581.41516, 7644.0615)(560.394, 453.78)(578.4073, 1311.2333)(563.41034, 8136.779)(593.4443, 128489.484)(594.4472, 31041.547)(595.4483, 1816.4751)(598.40137, 6407.034)(599.414, 1943.1462)(600.4338, 196.24)(582.39777, 886.174)	16.6305
(3-hydroxy-2-oxindol-3-yl)acetyl-L-aspartate	12438079	10309957	9611667	7811637	9479291	11746119	5221126	8281980	10095940	12606586	7829040	5334432	9801269	14326754	12597504	13663282	5760132	4880062	8081173	5428307	3-HYDROXY-2-OXINDOLE-3-ACETYL-ASP	3-HYDROXY-2-OXINDOLE-3-ACETYL-ASP [ C14 H12 N2 O7, tgt=59.65, overall=59.65 ]			(303.05106, 390804.8)(304.05402, 58489.105)(305.05585, 8058.7046)(324.08612, 1291.325)(339.1081, 2723.5662)(328.05255, 1007.73)	6.898
3-hydroxy-4h-pyrid-4-one	189431	1	1	1	1	1	1	1	1	144666	1	1	152158	1	359897	1	1	1	1	1	3-HYDROXY-4H-PYRID-4-ONE	3-HYDROXY-4H-PYRID-4-ONE [ C5 H5 N O2, tgt=52.05, overall=52.05 ]			(113.03508, 9178.332)(115.03967, 3479.24)(111.054825, 8695.123)(112.0522, 398.15)(136.02527, 1338.7075)(139.0347, 2979.4)	1.839
3-hydroxyanthranilate	1455928	1806569	1773479	1744884	1511071	1517542	1152090	2001775	1877672	1409063	756604	1107152	1634089	1615466	1341030	1452415	816353	1073435	408215	1673167	3-HYDROXY-ANTHRANILATE	3-HYDROXY-ANTHRANILATE [ C7 H6 N O3, tgt=72.85, overall=72.85 ]			(155.28078, 2165.3093)(138.0331, 1508.9019)(139.03384, 719.845)(153.0416, 511.55)(173.12907, 962.2306)(174.07692, 1800.6293)(152.05795, 43140.54)(153.05922, 1822.5464)(175.02226, 37285.82)(176.025, 1094.5574)(177.0254, 214.27)(157.01279, 12626.923)	2.09
3-hydroxybenzoate	478591	396765	513577	451548	299144	348036	317121	355697	255272	279203	295138	560010	523584	485287	514382	437372	334864	260498	271413	309571	3-HYDROXYBENZOATE	3-HYDROXYBENZOATE [ C7 H5 O3, tgt=63.43, overall=63.43 ]			(138.1335, 18287.756)(139.03122, 6658.023)(140.0275, 4109.11)(123.9245, 2957.9883)(139.035, 2125.19)(140.0354, 1560.66)(159.06903, 4391.6973)(139.75537, 45279.543)(141.05754, 9824.917)(143.0526, 187156.25)(144.05568, 9343.726)(145.0128, 2474.4993)	1.419
3-hydroxy-L-kynurenine	259457	135281	234842	208433	199049	301055	1	224747	295785	244214	1	191340	317761	256297	159207	194648	1	1	1	167448	3-HYDROXY-L-KYNURENINE	3-HYDROXY-L-KYNURENINE [ C10 H12 N2 O4, tgt=43.02, overall=43.02 ]			(224.07765, 9845.823)(247.1296, 1617.54)(229.11317, 948.7844)(252.08754, 1002.5842)(233.0621, 1002.73)	1.911
(<i>S</i>)-3'-hydroxy-<i>N</i>-methylcoclaurine	1	1	1	1	1	1	593426	1	1	1	371306	1	1	1	1	1	1	1	264619	1	3-HYDROXY-N-METHYL-S-COCLAURINE	3-HYDROXY-N-METHYL-S-COCLAURINE [ C18 H22 N O4, tgt= ]			(317.15665, 24422.635)(318.16, 1874.775)(317.1579, 14578.49)(341.1413, 584.13)	5.489
3-hydroxypropanoate	1	1	1	1	1	1	1	1	1	1	1	1	1	1	1	1	1	1	449048	1	3-HYDROXY-PROPIONATE	3-HYDROXY-PROPIONATE [ C3 H5 O3, tgt= ]			(114.0173, 23890.41)(115.0192, 3587.58)	1.402
acetoacetate	346546	298915	301003	308450	314579	277845	285404	280690	386283	349993	242910	283913	287823	334884	376198	277306	316396	269529	290638	267211	3-KETOBUTYRATE	3-KETOBUTYRATE [ C4 H5 O3, tgt=34.70, overall=34.70 ]			(107.04442, 15146.053)(128.4736, 535124.06)(128.19179, 234943.23)(129.02232, 196917.6)(110.00951, 344893.12)	1.405
phlorisovalerophenone	1	1	1	1	1	1	167556	1	1	1	1	1	1	1	1	1	1	1	1	1	3-METHYL-1-246-TRIHYDROXYPHENYLBUTAN	3-METHYL-1-246-TRIHYDROXYPHENYLBUTAN [ C11H14O4, tgt= ]			(193.0837, 8696.38)(217.0735, 910.01)	6.156
glucoiberin	580538	2184989	929357	1029173	813052	592496	1	740106	1022423	901880	1	420331	707550	817286	597940	733883	1	1	1	493215	3-METHYLSULFINYLPROPYL-GLUCOSINOLATE	3-METHYLSULFINYLPROPYL-GLUCOSINOLATE [ C11 H20 N O10 S3, tgt=20.52, overall=20.52 ]			(424.2124, 3733.05)(427.01642, 2382.815)(408.69156, 47319.055)(409.69366, 8866.465)(409.35678, 25810.357)(410.02704, 4231.005)(451.0129, 430.81)	2.059
(<i>E</i>)-4-(methylsulfanyl)butanal oxime	166507	1	2885641	784494	1	389467	1	222886	4097293	416532	1	493988	365878	3051007	777414	1524411	358273	1	308333	1	3-METHYLTHIOPROPANALDOXIME	3-METHYLTHIOPROPANALDOXIME [ C5 H11 N O S, tgt=57.91, overall=57.91 ]			(137.60158, 479749.88)(117.04003, 1154.3673)(136.70541, 38782.664)(137.06503, 5073.8496)(119.04974, 5557.565)(134.08168, 2144.3435)(156.04417, 47469.6)(157.04372, 5915.5654)(158.04123, 8720.651)(139.60574, 6061.825)(142.28271, 2223.96)(143.0342, 1598.17)	2.31025
3-(methylsulfanyl)propyl-desulfoglucosinolate	1	1	1	1	1	1	1	1	1	509942	185248	1	1	1	1	1	1	1	86154	1	3-METHYLTHIOPROPYL-DESULFO-GLUCOSINOLATE	3-METHYLTHIOPROPYL-DESULFO-GLUCOSINOLATE [ C11H21NO6S2, tgt= ]			(332.07526, 7563.21)(309.0668, 3276.085)(310.0729, 1022.89)(351.10385, 4069.94)(351.0693, 13950.855)(335.39777, 18141.66)(338.06534, 4839.785)	2.176
glucoiberverin	1188673	3816672	2635971	2992683	1508996	1217784	519197	2064445	2207925	1728600	306207	838157	1625949	1929787	933615	1637329	503071	1	251819	1143026	3-METHYLTHIOPROPYL-GLUCOSINOLATE	3-METHYLTHIOPROPYL-GLUCOSINOLATE [ C11 H20 N O9 S3, tgt=66.67, overall=66.67 ]			(389.019, 3361.3435)(407.87344, 60459.473)(408.6949, 23581.537)(409.67038, 13011.532)(410.02875, 3573.3474)(411.0275, 10300.16)(408.2017, 3630.365)	2.30475
(<i>E</i>)-&omega;-(methylsulfanyl)butyl-thiohydroximate	1019672	1411879	303178	2005474	357226	2001575	728489	261123	273072	669701	712186	1146257	1814122	295284	1	240637	442022	2495372	287234	1	3-METHYLTHIOPROPYLHYDROXAMIC-ACID	3-METHYLTHIOPROPYLHYDROXAMIC-ACID [ C5 H11 N O S2, tgt=44.58, overall=44.58 ]			(169.03589, 2192.9248)(171.02737, 54414.812)(172.02995, 4194.4966)(152.0194, 1875.0109)(186.65918, 5293.2295)(187.0602, 1409.48)(188.056, 257.88)(165.88757, 27953.508)(167.72188, 1780.5426)(190.01402, 5184.838)(191.01434, 1659.3025)(192.51073, 2179.5676)(193.00931, 1468.265)(173.00285, 2619.075)	1.61175
3-methylxanthine	1684511	605036	75864	272811	337097	1765379	4042639	267794	2369724	1000405	3152212	648486	84014	1685750	2135171	630302	3599453	3511311	4259351	577576	3-METHYLXANTHINE	3-METHYLXANTHINE [ C6 H6 N4 O2, tgt=61.48, overall=61.48 ]			(167.58102, 40219.8)(169.05214, 39702.117)(149.5441, 745.4325)(153.0523, 3075.93)(168.52464, 3021.924)(150.38104, 1665.8217)(187.09041, 7473.323)(166.77953, 3620.5208)(189.14494, 7025.083)(171.02763, 37847.535)(172.02989, 3734.6301)	2.151
3-nitrobenzaldehyde	1058353	120100	1069764	994477	100542	859533	964702	851569	1528347	1106279	698040	1176535	980756	1137433	1160651	1036984	1019461	825291	912489	1	3-NITROBENZALDEHYDE	3-NITROBENZALDEHYDE [ C7 H5 N O3, tgt=57.65, overall=57.65 ]			(153.03487, 7160.4907)(137.50067, 14306.013)(138.02812, 23248.506)(152.03716, 7794.512)(153.03435, 6430.246)(139.03267, 11230.307)(171.06677, 1645.8301)(173.06581, 3955.9287)(174.07005, 583.13336)(175.01895, 13863.212)	1.406
3-(O-&beta;-glucosyl)-(2-oxindol-3-yl)acetyl-L-aspartate	1052942	1	769964	582390	717603	934386	378521	624394	814999	1107691	604947	459124	788809	1316295	1154233	1319892	446164	330577	635301	368459	3-O-BETA-GLUCOSYL-2-OXINDOLE-3-ACETYL-	3-O-BETA-GLUCOSYL-2-OXINDOLE-3-ACETYL- [ C20 H22 N2 O12, tgt=50.22, overall=50.22 ]			(508.10626, 519.326)(465.1033, 49533.477)(466.10635, 9981.28)(467.10898, 1447.2284)(493.11865, 1541.0515)	6.893
3-hydroxybenzaldehyde	507918	281805	409225	267578	252237	237043	275698	277933	398770	564116	294565	537645	432653	407385	560608	1	274081	242278	228005	207290	3-OH-BENZALDEHYDE	3-OH-BENZALDEHYDE [ C7 H6 O2, tgt=63.26, overall=63.26 ]			(123.040146, 12150.732)(124.04075, 3649.09)(123.041466, 12778.327)(124.041595, 2360.5)(125.038895, 1678.375)(140.97305, 742.14606)(125.671486, 676.784)(147.0327, 361.41336)(129.02275, 143581.62)(130.02576, 7462.025)	1.41
3-oxo-dodecanoate	240810	138729	1	198162	217196	114828	292607	309485	232956	1	529623	539399	1	459085	442769	88997	399941	483896	328010	331592	3-OXODODECANOATE	3-OXODODECANOATE [ C12 H21 O3, tgt=45.97, overall=45.97 ]			(213.14894, 9057.189)(214.15256, 824.485)(195.13841, 11435.735)(196.14177, 888.26404)(237.1484, 8448.75)(218.1233, 381.96)	10.7408
3-phenylpropanoate	558962	153387	324997	1165040	184211	177619	1599905	349856	1154158	364306	88213	496130	228970	1151059	234930	265420	2494913	1419700	1546438	141198	3-PHENYLPROPIONATE	3-PHENYLPROPIONATE [ C9 H9 O2, tgt=59.03, overall=59.03 ]			(149.28232, 5870.488)(152.06955, 5258.74)(131.40752, 5642.1475)(132.04497, 783.9666)(152.0692, 13883.48)(153.0716, 138.7)(133.05913, 1491.964)(134.0593, 908.58)(167.09042, 49943.47)(150.0891, 223.72)(155.48152, 8005.4287)(156.12152, 22651.559)(157.04747, 5987.09)	1.89675
3-sulfino-L-alanine	104292	106069	1	161279	269772	1	1	1	161918	149735	1	1	1	118489	1	116223	1	1	1	186546	3-SULFINOALANINE	3-SULFINOALANINE [ C3 H6 N O4 S, tgt=45.55, overall=45.55 ]			(154.0027, 3849.815)(137.9909, 1681.79)(138.9896, 135.6)(154.51236, 1937.6575)(140.0041, 138.9)(175.03658, 2990.234)(152.30786, 3899.3416)(155.0201, 613.96)(178.99521, 7946.4453)(179.9903, 1051.21)(158.69418, 3223.4602)(161.9798, 5459.33)	2.157
3-sulfinopyruvate	1	1	1	1	1	1	1	1	84571	74034	1	1	1	77835	72524	1	1	1	1	1	3-SULFINYL-PYRUVATE	3-SULFINYL-PYRUVATE [ C3 H2 O5 S, tgt= ]			(168.00049, 6090.7847)(169.00133, 577.855)(177.9594, 1535.62)	1.405
L-willardiine	1	1	205406	149542	1	1	153587	259938	210901	1	1	1	1	1	1	1	126707	1	1	1	3-URACIL-1-YL-L-SERINE	3-URACIL-1-YL-L-SERINE [ C7H9N3O4, tgt= ]			(200.05872, 6802.7373)(181.0506, 660.115)(184.06245, 8055.69)	3.722
3-(carbamoylamino)-2-methylpropanoate	5273129	4297596	5722364	5295021	4589491	4603201	342801	4637649	736957	5588964	4197386	5751463	5144541	1	5591280	5565248	5108911	4139105	521296	3949687	3-UREIDO-ISOBUTYRATE	3-UREIDO-ISOBUTYRATE [ C5 H9 N2 O3, tgt=59.85, overall=59.85 ]			(146.06084, 1068.8334)(167.1064, 75.74)(145.0849, 7716.4297)(168.05144, 257367.03)(169.05255, 47632.215)(170.05118, 42138.836)	1.95385
3-ureidopropanoate	246680	144222	194990	141520	201314	110334	133238	177351	157804	274913	87211	190772	198996	347923	244582	234473	140870	133268	114915	177571	3-UREIDO-PROPIONATE	3-UREIDO-PROPIONATE [ C4 H7 N2 O3, tgt=75.81, overall=75.81 ]			(131.1894, 6372.062)(132.04474, 667.4633)(113.70253, 9687.38)(136.06282, 123746.25)(137.06474, 8741.608)(116.546524, 2167.73)(150.0779, 13571.156)(151.83144, 3395.105)(154.08673, 1569.4501)(156.12572, 34970.45)(157.54123, 3908.2747)(158.04144, 10982.04)(137.18219, 4255.8823)(139.0309, 7199.25)	1.897
(2R,3Z)-phycocyanobilin	271689	1	99523	159714	110329	141528	207762	127559	154400	201131	162112	1	169932	236565	223127	88170	152329	165365	228235	95545	3Z-PHYCOCYANOBILIN	3Z-PHYCOCYANOBILIN [ C33 H36 N4 O6, tgt=64.81, overall=64.81 ]			(586.2703, 7290.824)(587.2733, 1179.646)(568.3703, 2642.5796)(571.03314, 2309.7002)(568.92474, 1306.7767)(573.2886, 3665.51)(607.3218, 6409.34)(608.3243, 1291.1)(585.2887, 583.65)(587.3044, 2764.69)(608.25525, 5213.466)(609.25885, 1192.7885)	7.169
(3Z)-phytochromobilin	98869	1	1	1	1	1	91863	1	1	1	1	1	1	1	1	1	1	260182	110143	1	3Z-PHYTOCHROMOBILIN	3Z-PHYTOCHROMOBILIN [ C33 H34 N4 O6, tgt=2.58, overall=2.58 ]			(585.2544, 4606.44)(566.2501, 1000.0801)(569.2613, 1244.04)(569.262, 393.39)(583.9438, 1470.3633)(586.2827, 6004.44)(587.3018, 2770.07)	7.915
4,21-dehydrogeissoschizine	736660	735770	706785	745328	829299	706885	921489	644508	793352	731828	964489	787080	700500	553807	583447	764967	866804	889385	995342	715918	421-DEHYDROGEISSOSCHIZINE	421-DEHYDROGEISSOSCHIZINE [ C21 H23 N2 O3, tgt=76.95, overall=76.95 ]			(337.16602, 4297.7017)(338.16846, 903.58)(337.16776, 2417.345)(352.17892, 52861.06)(353.1827, 14656.7)(354.1866, 343.85)(357.14914, 2447.0742)	8.5785
14-demethyllanosterol	387823	256586	468352	595954	318684	571769	717492	372011	426338	364083	1040433	858977	473211	487548	417536	409395	894264	910531	762093	387268	44-DIMETHYL-824-CHOLESTADIENOL	44-DIMETHYL-824-CHOLESTADIENOL [ C29 H48 O, tgt=63.37, overall=63.37 ]			(435.35953, 13727.193)(436.3627, 2012.8604)	22.886
4,4-dimethyl-cholesta-8,12,24-trienol	1	1	1032476	1140804	1	1056867	1	1375055	1	1	1453779	1	1	1562291	1	1178775	1	1	1	5204394	44-DIMETHYL-CHOLESTA-812-24-TRIENOL	44-DIMETHYL-CHOLESTA-812-24-TRIENOL [ C29 H46 O, tgt=11.88, overall=11.88 ]			(435.3638, 3973.26)(415.32635, 38725.938)(416.33008, 6934.2773)(417.3525, 5297.88)	7.805
4,4-dimethyl-5-&alpha;-cholesta-8,14,24-trien-3-&beta;-ol	1	1	1032476	1140804	1	1056867	1	1375055	1	1	1453779	1	1	1562291	1	1178775	1	1	1	5204394	44-DIMETHYL-CHOLESTA-814-24-TRIENOL	44-DIMETHYL-CHOLESTA-814-24-TRIENOL [ C29 H46 O, tgt=11.88, overall=11.88 ]			(435.3638, 3973.26)(415.32635, 38725.938)(416.33008, 6934.2773)(417.3525, 5297.88)	7.805
4-amino-4-deoxychorismate	1356349	561963	1084734	1059632	1068358	1437455	404254	955325	1379815	1356063	379451	1082172	1790844	1063896	889164	860254	402567	291280	397989	105034	4-AMINO-4-DEOXYCHORISMATE	4-AMINO-4-DEOXYCHORISMATE [ C10 H10 N O5, tgt=67.25, overall=67.25 ]			(206.77548, 1335.78)(210.06061, 79768.9)(211.0632, 11865.96)(208.41937, 3699.36)(209.06445, 296.32)(242.79633, 2473.341)(224.0776, 5685.356)(225.0766, 127.27)(247.04387, 16132.542)(248.0507, 797.7692)(229.23206, 3303.4692)	1.895
4-aminobutanoate	791940	1	586290	659440	650115	1	774753	1042881	880222	824711	531452	1118984	898050	442271	1119731	433153	754416	1	457394	737920	4-AMINO-BUTYRATE	4-AMINO-BUTYRATE [ C4 H9 N O2, tgt=79.70, overall=79.70 ]			(104.071236, 46945.69)(105.07454, 1389.482)(130.06354, 890.2434)(111.76559, 621.9986)(112.0509, 177.85)	1.608
<i>trans</i>-5-<i>O</i>-(4-coumaroyl)-D-quinate	564548	319927	413377	465403	367422	481463	173998	585896	522761	586055	300398	335536	610335	736558	599551	448072	194650	176777	249505	312509	4-COUMAROYLQUINATE	4-COUMAROYLQUINATE [ C16 H17 O8, tgt=52.74, overall=52.74 ]			(337.08768, 27131.234)(338.09158, 2117.1047)(339.0869, 1822.0875)(320.01172, 1478.9115)(321.0969, 2705.1724)(364.19727, 6232.4067)(365.1048, 29422.293)	1.585
4-(cytidine 5'-diphospho)-2-C-methyl-D-erythritol	1	1	1	1	664836	1	1	1	1	1	1	1	610077	1	1	670462	1	1	1	577100	4-CYTIDINE-5-DIPHOSPHO-2-C	4-CYTIDINE-5-DIPHOSPHO-2-C [ C14H23N3O14P2, tgt= ]			(543.0526, 926.055)(528.0423, 1729.4249)	20.142
4-fluorobenzoate	1	457146	1	1	708661	1	121946	200167	1	1	131559	1	1	1	1	1	1	1	1	92600	4-FLUOROBENZOATE	4-FLUOROBENZOATE [ C7H4FO2, tgt= ]			(140.02528, 1249.47)(140.0266, 1978.17)(124.02438, 1744.82)(142.05307, 4474.2314)(144.00204, 8165.965)(145.01181, 313.095)	1.4038
4- fluoroglutamate	183724	669344	156756	135747	370199	314940	256364	408641	468781	756995	143283	128717	207247	214821	327848	161687	192333	142608	224952	383457	4--FLUOROGLUTAMATE	4--FLUOROGLUTAMATE [ C5 H8 F N O4, tgt=47.60, overall=47.60 ]			(167.47983, 2258.3042)(147.28142, 10877.6455)(167.05173, 2992.5288)(149.15524, 1804.8221)(153.05504, 2281.8499)(187.7574, 13224.478)(188.0929, 11250.89)(167.30501, 5343.73)(189.03958, 7091.7915)(191.04022, 1387.7576)(171.02748, 42897.1)(172.40524, 4084.1887)(175.0366, 219.5)	2.109
4-guanidinobutyramide	138218	1	99019	1	117727	108948	628559	1	1	262874	632482	540350	108733	132256	543996	154466	648551	564173	739787	1	4-GUANIDO-BUTYRAMIDE	4-GUANIDO-BUTYRAMIDE [ C5 H13 N4 O, tgt=34.32, overall=34.32 ]			(146.51074, 1695.8679)(148.1146, 2651.15)(132.1027, 368529.9)(146.11806, 13745.416)(147.11858, 1114.465)(168.1008, 10474.305)(150.42516, 710.44336)	1.876
4-hydroxyglucobrassicin	655049	1	1	1	1	140313	1	232541	1	658954	1	211898	319116	148704	1069242	129359	1	1	1	1	4-HYDROXY-3-INDOLYLMETHYL-GLUCOSINOLATE	4-HYDROXY-3-INDOLYLMETHYL-GLUCOSINOLATE [ C16 H19 N2 O10 S2, tgt=44.87, overall=44.87 ]			(465.04156, 5717.037)(466.04333, 600.275)(467.04126, 743.05)(451.0437, 349.62)(449.05637, 1286.1942)(451.0481, 552.015)(481.0773, 1688.29)(463.06744, 4152.455)(464.0702, 156.4)	1.557
4-hydroxybenzaldehyde	507918	281805	409225	267578	252237	237043	275698	277933	398770	564116	294565	537645	432653	407385	560608	1	274081	242278	228005	207290	4-HYDROXYBENZALDEHYDE	4-HYDROXYBENZALDEHYDE [ C7 H6 O2, tgt=63.26, overall=63.26 ]			(123.040146, 12150.732)(124.04075, 3649.09)(123.041466, 12778.327)(124.041595, 2360.5)(125.038895, 1678.375)(140.97305, 742.14606)(125.671486, 676.784)(147.0327, 361.41336)(129.02275, 143581.62)(130.02576, 7462.025)	1.41
4-hydroxybenzoate	478591	396765	513577	451548	299144	348036	317121	355697	255272	279203	295138	560010	523584	485287	514382	437372	334864	260498	271413	309571	4-hydroxybenzoate	4-hydroxybenzoate [ C7 H5 O3, tgt=63.43, overall=63.43 ]			(138.1335, 18287.756)(139.03122, 6658.023)(140.0275, 4109.11)(123.9245, 2957.9883)(139.035, 2125.19)(140.0354, 1560.66)(159.06903, 4391.6973)(139.75537, 45279.543)(141.05754, 9824.917)(143.0526, 187156.25)(144.05568, 9343.726)(145.0128, 2474.4993)	1.419
4-methylpentanal	1	1284716	1	1	1094077	1297079	864026	1132832	1	1	762847	1	1	1	1	1	1	648651	1	792287	4-METHYLPENTANAL	4-METHYLPENTANAL [ C6 H12 O, tgt= ]			(104.106964, 6457.3687)(105.07016, 44419.453)(106.073395, 2603.141)	3.641
4-methyl-umbelliferyl phosphate	139695	144562	124818	99688	91836	91850	1	127559	87767	86174	1	132159	147665	1	155358	118529	99952	1	1	129570	4-METHYL-UMBELLIFERYL-PHOSPHATE	4-METHYL-UMBELLIFERYL-PHOSPHATE [ C10 H7 O6 P, tgt=51.88, overall=51.88 ]			(259.01138, 3282.8362)(235.98267, 1416.1)(236.9756, 343.13)(259.01227, 1777.1075)(260.014, 649.88)(241.00555, 269230.75)(242.00644, 87128.67)(254.02269, 1076.5309)(255.0225, 432.64)(278.4913, 975.15)(258.97943, 2375.462)	1.409
(1<i>E</i>)-4-oxobut-1-ene-1,2,4-tricarboxylate	1	196053	143951	205779	165883	1	203342	139255	232043	223406	223149	1	1	168725	1	181854	187659	191069	203618	1	4-OXALOMESACONATE	4-OXALOMESACONATE [ C7 H3 O7, tgt= ]			(198.98314, 874.95374)(203.00496, 3418.0842)(186.9947, 14889.675)(217.02235, 6986.882)(204.02013, 15727.522)(208.98267, 1609.77)	2.061
4-phosphooxy-L-threonine	1	183204	108989	69440	121310	219674	129970	87539	182150	302696	1	1	1	465027	89296	173846	125863	1	1	1	4-PHOSPHONOOXY-THREONINE	4-PHOSPHONOOXY-THREONINE [ C4 H8 N O7 P, tgt= ]			(214.00449, 2812.3154)(217.014, 579.71)(198.40044, 1120.488)(199.5003, 482.44)(214.9161, 51413.68)(217.59439, 67070.95)(218.02396, 51492.1)(219.0259, 42265.91)(199.0037, 416.07)(233.04237, 3746.74)(217.03578, 614.35)(241.00603, 35011.47)(222.98903, 3994.7444)	1.761
(<i>R</i>)-4'-phosphopantothenate	91427	149192	1	643569	1173992	1876420	606016	1416762	1218450	96105	373138	1	1	2584740	3368000	1970201	646439	434182	914872	996743	4-P-PANTOTHENATE	4-P-PANTOTHENATE [ C9 H15 N O8 P, tgt=6.34, overall=6.34 ]			(298.06616, 1897.2324)(278.0364, 3994.944)(297.56757, 4467.1733)(298.39935, 1266.3617)(279.04645, 9410.244)(314.09207, 5092.332)(300.0882, 723.89)(321.2653, 700.9957)(322.05414, 572.195)(302.78857, 3772.7126)	1.509
4-prenylphlorisobutyrophenone	14909013	13285606	15771118	14960692	8619134	12146265	17442548	10727722	15736034	19256280	12164186	12869397	15898250	4781943	14166828	7877302	16176676	15892061	13987468	13570174	4-PRENYLPHLORISOBUTYROPHENONE	4-PRENYLPHLORISOBUTYROPHENONE [ C15 H19 O4, tgt=83.01, overall=83.01 ]			(289.1252, 194.44)(247.12961, 2311.645)(286.17578, 2682.713)(268.10526, 530226.4)(269.10773, 59809.863)(270.10822, 8068.639)	2.091
5,10-methenyl-THF	1533485	943583	891188	876485	600670	1364777	1183730	736980	1708433	1330563	1556508	998271	1108928	1506072	1522502	1288757	1342300	685878	1566956	606119	510-methenyl-thf	510-methenyl-thf [ C20 H22 N7 O6, tgt=90.20, overall=90.20 ]			(483.14868, 1895.2749)(439.15796, 54855.832)(440.15973, 11644.797)(441.16376, 2214.8792)(457.16882, 2378.2546)(458.92914, 14751.702)(460.18478, 2399.5632)(459.1841, 8056.029)(460.69333, 2767.7656)(461.199, 501.365)	4.579
5,10-methenyltetrahydrofolate mono-L-glutamate	3159074	2570348	4031505	3681395	1947755	1	399807	1903078	2833349	5460941	531737	978236	4332795	1506811	3919161	2628590	285765	315944	1	1324295	5-10-METHENYL-THF	5-10-METHENYL-THF [ C20 H20 N7 O6, tgt=68.70, overall=68.70 ]			(455.1529, 117262.016)(456.1557, 21726.643)(457.15332, 5344.1567)(458.15884, 1471.435)(441.153, 272.4)	3.837
luteolin	365016	1007932	692997	731128	420422	421731	134513	89959	354235	475841	412383	142263	533306	827180	296879	358716	113410	246118	307101	545379	5734-TETRAHYDROXYFLAVONE	5734-TETRAHYDROXYFLAVONE [ C15 H9 O6, tgt=77.61, overall=77.61 ]			(289.0427, 570.45)(287.05396, 5311.2935)(273.04614, 8853.298)(306.13324, 24664.82)(307.1837, 18400.842)(308.0837, 1647.47)(289.32428, 1349.155)(308.02335, 29051.346)(291.01984, 16516.225)(292.02216, 3178.112)(293.0225, 1440.44)	2.057
chrysoeriol	1519913	853708	1396346	1481392	1105777	1308004	978486	1241897	1765347	1624672	812408	1384845	1189363	1586576	1621559	1239912	1557309	943096	1519981	821232	574-TRIHYDROXY-3-METHOXYFLAVONE	574-TRIHYDROXY-3-METHOXYFLAVONE [ C16 H11 O6, tgt=9.73, overall=9.73 ]			(299.64886, 67240.805)(300.65045, 23728.838)(322.0933, 388.18)	1.398
5&alpha;-cholesta-7,24-dien-3&beta;-ol	1	1	1	1	1	1	1	1	1	1	1	1	1	1	1	1	166459	1	1	1	5-ALPHA-CHOLESTA-724-DIEN-3-BETA-OL	5-ALPHA-CHOLESTA-724-DIEN-3-BETA-OL [ C27H44O, tgt= ]			(412.3445, 5581.13)(394.3453, 400.0)	17.844
5-dehydro-D-gluconate	1072110	3470701	2030532	1924867	1341111	1085529	1	1904768	2322561	2176959	210993	1203725	1845603	1770153	1473890	2100664	1	1	247082	2116679	5-DEHYDROGLUCONATE	5-DEHYDROGLUCONATE [ C6 H9 O7, tgt=75.53, overall=75.53 ]			(193.03517, 30365.055)(194.03827, 728.67096)(175.02307, 40205.4)(176.02585, 1085.2087)(177.0224, 1828.56)(198.056, 205.03)(211.06459, 8235.357)(212.06578, 563.2)(198.07486, 3690.0122)(216.1384, 17047.96)(219.02734, 55914.53)(220.03134, 2782.415)(198.01285, 355.55)	2.055
(6<i>S</i>)-5-formyl-tetrahydrofolate mono-L-glutamate	1	1	1	1	1	1	1	1	1	1	1	1	1	1	1	1	1	326687	1	1	5-FORMYL-THF	5-FORMYL-THF [ C20H21N7O7, tgt= ]			(471.1815, 14006.69)(472.1846, 1430.22)	15.93
5-hydroxy-coniferaldehyde	1	1	1	574615	1	1	808566	1	1	1	1024768	1	1	1	1	1	686215	549357	965642	1	5-HYDROXY-CONIFERALDEHYDE	5-HYDROXY-CONIFERALDEHYDE [ C10H10O4, tgt= ]			(195.06584, 9321.874)(177.05652, 32531.986)(178.05922, 2299.665)(217.09961, 2834.2878)(201.04424, 7125.529)	5.3065
5-hydroxyferulate	120414	554603	532434	97690	441691	462797	495432	459789	689921	762812	550680	607564	703584	544296	194261	160052	398451	432774	474163	430812	5-HYDROXY-FERULIC-ACID	5-HYDROXY-FERULIC-ACID [ C10 H9 O5, tgt=71.11, overall=71.11 ]			(212.0524, 744.5919)(191.67154, 8080.0923)(192.03839, 948.23)(212.0533, 861.54)(192.03717, 18946.541)(227.0801, 10405.37)(228.08337, 709.79)(211.9322, 2121.2944)	4.222
(<i>S</i>)-5-hydroxyisourate	480107	167414	126293	300664	1	169665	179254	145595	255119	119254	240558	159686	624775	138535	818661	250483	93467	147325	1	119814	5-HYDROXYISOURATE	5-HYDROXYISOURATE [ C5 H4 N4 O4, tgt=36.64, overall=36.64 ]			(189.0379, 243.2)(167.01344, 5156.3)(168.01266, 753.504)(186.57474, 3930.6814)(169.07823, 7674.9575)(170.89331, 31760.729)(172.02954, 3303.2483)(203.05403, 17961.48)(204.05672, 1112.8479)(184.77632, 1295.6145)(212.02832, 438.54004)(190.11877, 2913.251)(193.0087, 1658.1101)	1.72
5-hydroxy-L-tryptophan	1	1	1	1	1	1	674431	1	1	1	565566	169686	1	235367	235881	1	406357	237682	424088	1	5-HYDROXY-TRYPTOPHAN	5-HYDROXY-TRYPTOPHAN [ C11H12N2O3, tgt= ]			(221.09259, 9559.392)(222.09673, 297.2475)(203.08083, 2372.2114)(244.82683, 565.18756)	2.2081
5-isobutylthioribose	1	1	1	1	1	1	295064	1	1	1	1	430205	1	1	1	1	1	176843	485603	1	5-ISOBUTYLTHIORIBOSE	5-ISOBUTYLTHIORIBOSE [ C9 H18 O4 S, tgt=44.38, overall=44.38 ]			(204.58249, 7358.4854)(206.0738, 1324.58)(205.09006, 1053.965)(243.1338, 701.05)(245.0799, 17440.76)(246.0832, 467.35)	13.155
bergapten	1129862	519127	1	475782	606029	425221	937576	462859	1	1426655	405536	923268	1036622	324515	1312610	1	1	836366	946821	455907	5-METHOXYFURANOCOUMARIN	5-METHOXYFURANOCOUMARIN [ C12 H8 O4, tgt=46.98, overall=46.98 ]			(217.04466, 1515.9266)(217.03859, 405.63)(198.02821, 4402.744)(199.0323, 357.125)(219.55312, 2722.8125)(220.55936, 1016.685)(200.37886, 6701.859)(201.78154, 14663.119)(203.20766, 29128.408)(203.93088, 11593.101)(204.0569, 5560.97)(238.09259, 861.1379)(217.06819, 649.48663)(239.02826, 1114.5916)(221.08928, 18102.408)(222.02971, 4742.8003)	1.656
5-methyl-DL-tryptophan	114752	1	1	1	1	1	1	1	265043	231588	1	1	1	242478	212281	249761	1	1	1	1	5-METHYL-DL-TRYPTOPHAN	5-METHYL-DL-TRYPTOPHAN [ C12 H14 N2 O2, tgt=35.11, overall=35.11 ]			(219.10164, 28644.729)(220.1053, 1852.5902)	7.215
5-methyltetrahydropteroyl mono-L-glutamate	2013762	1325868	1262142	1761571	737682	1747422	1488770	1382081	2383066	1859711	1936714	1378627	1490722	2170278	2936054	1597866	1672798	832925	1946844	699196	5-METHYL-THF	5-METHYL-THF [ C20 H23 N7 O6, tgt=84.85, overall=84.85 ]			(457.5465, 5532.762)(458.84317, 1075.4166)(461.1927, 264.49)(439.15796, 41658.93)(440.15845, 9715.298)(441.16382, 1679.9242)(459.18365, 10516.126)(460.52393, 1997.4508)(461.19623, 438.538)(479.2069, 630.35)(461.1994, 3847.5928)(480.17178, 772.1567)	4.579
<i>S</i>-methyl-5'-thioadenosine	2540885	1485745	1697244	1415141	801868	2385734	1349286	1	1470973	1	859120	1436774	2125773	1986619	2831258	4405266	1278916	1	910619	1291405	5-METHYLTHIOADENOSINE	5-METHYLTHIOADENOSINE [ C11 H15 N5 O3 S, tgt=47.11, overall=47.11 ]			(285.09506, 3984.0513)(317.1204, 1493.4347)(298.09763, 86537.625)(299.10022, 10601.926)(300.09598, 3617.2844)(303.98026, 2110.1655)(305.07318, 1230.915)	3.663
<i>S</i>-methyl-5'-thioinosine	1	1	7200285	5582519	1	1	1	1	7683837	1	5784005	4435704	1	12043040	1	11953064	4165988	1	5711598	1	5-METHYLTHIOINOSINE	5-METHYLTHIOINOSINE [ C11H14N4O4S, tgt= ]			(325.0589, 113354.59)(326.06128, 8368.806)(303.05154, 409012.72)(304.05453, 60964.043)(305.05643, 8540.103)	6.898
5'-n-propylthioadenosine	5456279	4762475	5030694	4759254	5024680	4775065	13250337	4531529	5496372	5556163	13098098	5330734	4983548	4722039	5173224	5314435	13409565	12796857	14285192	4465890	5-N-PROPYLTHIOADENOSINE	5-N-PROPYLTHIOADENOSINE [ C13 H19 N5 O3 S, tgt=69.05, overall=69.05 ]			(325.11652, 228705.08)(326.11948, 27660.818)(327.12094, 4646.7646)	8.602
5-O-(indol-3-ylacetyl-<i>myo</i>-inositol) D-galactoside	354015	172686	123042	196393	1	1	80957	1	273298	167919	574507	1	647250	207449	788289	293719	551445	493227	366111	1	5-O-INDOL-3-YLACETYL-MYO-ETCETERA	5-O-INDOL-3-YLACETYL-MYO-ETCETERA [ C22 H29 N O12, tgt=46.05, overall=46.05 ]			(501.58408, 3276.3276)(481.16998, 9770.04)(482.17346, 975.71497)(503.192, 2036.3779)(504.1946, 308.82)(517.19116, 1414.855)(502.3053, 3092.6357)(500.1799, 591.67)(527.42725, 1043.4926)(528.1821, 2166.38)	6.58384
5-phospho-&beta;-D-ribosylamine	247275	901213	305517	899124	137446	122282	447295	169651	1180916	786304	539461	114040	235158	457298	263452	752541	450998	448229	603952	100274	5-P-BETA-D-RIBOSYL-AMINE	5-P-BETA-D-RIBOSYL-AMINE [ C5 H11 N O7 P, tgt=45.21, overall=45.21 ]			(228.9202, 4727.82)(230.0341, 357.61)(229.03314, 13810.703)(230.035, 104.03)(211.75417, 9564.828)(230.65582, 1789.5233)(233.0625, 1130.32)(256.0317, 1354.616)	3.034
5-amino-1-(5-phospho-&beta;-D-ribosyl)imidazole	1797274	1	1733574	1790556	247737	2058415	276928	1375608	2304306	2009527	317506	1655595	2471852	1560519	1413284	1547495	305262	371433	375520	1870636	5-PHOSPHORIBOSYL-5-AMINOIMIDAZOLE	5-PHOSPHORIBOSYL-5-AMINOIMIDAZOLE [ C8 H13 N3 O7 P, tgt=47.00, overall=47.00 ]			(277.1526, 85115.234)(278.10352, 7886.107)(279.04047, 11618.24)(296.06717, 15908.88)(297.66754, 1744.594)(298.06555, 577.365)(279.0474, 12491.781)(314.09296, 2743.9685)(294.47403, 1028.4939)(320.78415, 1308.272)(322.05545, 873.88)(302.04202, 5325.9917)	1.656
<i>N</i><sup>1</sup>-(5-phospho-&beta;-D-ribosyl)glycinamide	237494	1	395161	430203	301342	231193	86835	406288	352759	475841	97664	142263	830405	102521	543712	358716	77456	246118	86954	151527	5-PHOSPHO-RIBOSYL-GLYCINEAMIDE	5-PHOSPHO-RIBOSYL-GLYCINEAMIDE [ C7 H14 N2 O8 P, tgt=72.13, overall=72.13 ]			(308.029, 9401.04)(303.08408, 7670.821)(304.08133, 1042.5013)(287.05423, 11017.1)(293.53442, 1528.62)(294.0386, 465.49)(289.64972, 906.75006)(290.07675, 3061.8435)	1.894
2-(formamido)-N<sup>1</sup>-(5-phospho-&beta;-D-ribosyl)acetamidine	1	1	1	1	1	1	1	1	1	187992	178836	1	1	1	681736	1	534371	88282	133000	1	5-PHOSPHORIBOSYL-N-FORMYLGLYCINEAMIDINE	5-PHOSPHORIBOSYL-N-FORMYLGLYCINEAMIDINE [ C8 H15 N3 O8 P, tgt= ]			(317.06918, 1845.2067)(313.0801, 17384.46)(314.41974, 5032.42)(315.0919, 6663.71)	7.071
5'-(p-nitrophenyl)thioadenosine	1	1	1	1	1	1	226961	1	1	1	157977	1	1	1	1	1	241951	1	1	1	5-P-NITROPHENYLTHIOADENOSINE	5-P-NITROPHENYLTHIOADENOSINE [ C16 H16 N6 O5 S, tgt= ]			(406.08386, 2078.2532)(409.10867, 433.2767)(409.07382, 7644.2397)	4.684
<i>N</i><sup>2</sup>-formyl-<i>N</i><sup>1</sup>-(5-phospho-&beta;-D-ribosyl)glycinamide	1	1	1	1	1	1	429238	1	1	1	417208	1	1	1	1	1	354304	439954	536116	1	5-P-RIBOSYL-N-FORMYLGLYCINEAMIDE	5-P-RIBOSYL-N-FORMYLGLYCINEAMIDE [ C8 H13 N2 O9 P, tgt= ]			(331.57382, 1088.1074)(335.02927, 24083.762)(336.03232, 863.264)(321.0145, 8985.01)	2.182
prostaglandin E<sub>2</sub>	1757469	1596723	2064380	2189376	1343641	1065501	2629374	2291588	2439412	2327988	3256446	3177692	4173965	1404533	4145236	734878	2408451	2989106	2075203	2243866	5Z13E-15S-1115-DIHYDROXY-9-OXOPROS	5Z13E-15S-1115-DIHYDROXY-9-OXOPROS [ C20 H31 O5, tgt=88.70, overall=88.70 ]			(351.21512, 119134.79)(352.21814, 20636.648)(353.21906, 2262.858)(335.2104, 1113.6632)	10.154
(5Z,8Z,11Z,14Z,17Z)-icosapentaenoate	125335	142694	1	1	117024	218348	2420343	1	1	1	3357770	1	107970	1	143617	1	2625365	2047158	2168953	153746	5Z8Z11Z14Z17Z-EICOSAPENTAENOATE	5Z8Z11Z14Z17Z-EICOSAPENTAENOATE [ C20 H29 O2, tgt=62.58, overall=62.58 ]			(306.24, 9078.83)(302.51694, 5012.4644)(304.73926, 9802.17)(307.2442, 2283.24)(284.82135, 7148.716)(288.89893, 853.5867)(289.2321, 2954.4)(319.581, 30080.201)(302.9563, 30510.355)(303.2448, 6329.9062)(303.2493, 174.57)(308.53403, 668.26337)(309.204, 615.98)	11.7209
1-(3,4-dihydroxyphenyl)-3-(3-<i>C</i>-glucosyl-2,4,6-trihydroxyphenyl)propane-1,3-dione	1269413	967249	924307	698315	867588	1119970	448940	735238	972053	1342774	724381	547031	944189	1576116	1430138	1578829	536620	393971	754571	434395	6C-Glc-2-hydroxyeriodictyol	6C-Glc-2-hydroxyeriodictyol [ C21 H21 O12, tgt=95.64, overall=95.64 ]			(493.11865, 1535.9401)(449.10794, 6579.753)(465.10318, 45818.586)(466.1062, 9140.596)(467.10904, 1543.4642)	6.895
6<sub>G</sub>-kestotriose	384713	1	341997	328255	1	326107	776759	292776	373906	788041	787846	1	349180	1	355234	363190	841574	749984	829199	1	6G-KESTOTETRAOSE	6G-KESTOTETRAOSE [ C18 H32 O16, tgt=16.90, overall=16.90 ]			(487.16998, 16244.691)(488.17377, 943.66003)	8.617
6-hydroxymellein	1	1	1	574615	1	1	808566	1	1	1	1024768	1	100493	1	1	1	686215	549357	965642	1	6-HYDROXYMELLEIN	6-HYDROXYMELLEIN [ C10H10O4, tgt= ]			(195.06584, 9321.874)(198.0757, 2241.84)(177.05652, 32531.986)(178.05922, 2299.665)(217.09961, 2834.2878)(219.0505, 33461.09)(220.058, 2297.63)(201.04402, 6648.7344)	5.85
6-hydroxyprotopine	428903	164535	273834	231988	1	376152	301942	163099	201462	483139	355906	1	134070	226097	223103	712585	425421	315959	400691	1	6-HYDROXYPROTOPINE	6-HYDROXYPROTOPINE [ C20 H19 N O6, tgt=65.35, overall=65.35 ]			(369.11917, 15441.923)(370.12265, 2042.5166)(374.14462, 9362.109)(375.1492, 627.19)(355.1363, 10453.03)(389.82712, 2841.8564)(369.65253, 5698.399)(370.15558, 187.095)(395.1303, 995.78)	6.12574
6-kestotriose	384713	1	341997	328255	1	326107	776759	292776	373906	788041	787846	1	349180	1	355234	363190	841574	749984	829199	1	6-KESTOSE	6-KESTOSE [ C18 H32 O16, tgt=16.90, overall=16.90 ]			(487.16998, 16244.691)(488.17377, 943.66003)	8.617
6-methoxymellein	143463	180818	96678	1	132592	89957	1	1	108971	102671	1	220292	162102	138620	124455	98982	1	1	1	151512	6-METHOXYMELLEIN	6-METHOXYMELLEIN [ C11 H12 O4, tgt=47.04, overall=47.04 ]			(209.08119, 1436.8267)(191.07019, 764.42505)(191.07109, 5823.033)(230.11824, 2183.6538)(213.1095, 272.69)(232.06422, 1960.0885)(215.25655, 1985.886)(217.0672, 693.185)	4.5444
primeverose	940677	730554	431604	1	11878301	390638	35199740	1	23185614	1	34856784	13047615	1	25598488	1	12215869	25200540	1	712942	1	6-O-BETA-D-XYLOPYRANOSYL	6-O-BETA-D-XYLOPYRANOSYL [ C11 H20 O10, tgt=74.42, overall=74.42 ]			(295.10468, 430164.16)(296.10788, 47240.68)(297.11035, 13156.4795)(312.46585, 475.27164)(339.10944, 1048.2372)	8.616
(<i>S</i>)-6-<i>O</i>-methylnorlaudanosoline	314691	1	302669	349719	300148	332166	655969	304628	452096	423752	1	550800	1	1	8893249	1	787736	1	741311	414961	6-O-METHYLNORLAUDANOSOLINE	6-O-METHYLNORLAUDANOSOLINE [ C17 H20 N O4, tgt=65.32, overall=65.32 ]			(303.14188, 19538.191)(304.1451, 1268.926)(287.1414, 6355.6514)(285.635, 3193.575)(304.1558, 576.13)(285.13586, 34779.363)(286.13873, 5201.99)(304.84494, 15830.05)(305.172, 5678.68)(307.1112, 1556.46)	4.636
6-oxohexanoate	245170	177269	1	1	1	1	257141	1	1	223500	271621	234327	261971	1	282814	1	216885	203708	242875	1	6-OXO-HEXANOATE	6-OXO-HEXANOATE [ C6 H9 O3, tgt=45.06, overall=45.06 ]			(115.05466, 9595.722)(130.06563, 11581.199)(131.28586, 2244.9949)(133.08511, 2679.9978)	4.209
7,8-dihydropteroate	1	239480	1206498	1444970	190590	1404093	3913628	1635382	4278209	1063731	396260	1	596542	1	1293344	1605063	860175	1	1	262820	78-dihydropteroate	78-dihydropteroate [ C14 H14 N6 O3, tgt=55.68, overall=55.68 ]			(296.10632, 25121.773)(297.10712, 4043.6802)(299.4497, 2286.5088)(337.163, 521.51)(314.13983, 19779.102)(315.14273, 4115.95)(339.109, 378.29)(320.76273, 871.8233)(322.0933, 129.39)	6.08
7,8-dihydropteroate	2829212	1924858	2470740	2443059	27917696	2365205	2365448	2953868	35231000	2599629	1942416	2203020	2381957	38405036	3418022	2403884	750575	3750129	32184562	30239172	7-8-DIHYDROPTEROATE	7-8-DIHYDROPTEROATE [ C14 H13 N6 O3, tgt=44.61, overall=44.61 ]			(319.1299, 1947.72)(296.10727, 33006.957)(297.10867, 5959.608)(339.1093, 2386.4077)(318.0774, 1228.4366)	7.801
7-deoxyloganin	688059	571897	572960	569505	378554	606551	503031	672160	692190	979530	363870	568621	761557	1058696	883677	538195	545652	222752	377432	413118	7-DEOXYLOGANIN	7-DEOXYLOGANIN [ C17 H26 O9, tgt=80.62, overall=80.62 ]			(375.1551, 11965.738)(376.15833, 1460.665)(357.14316, 3509.8098)(362.17087, 625.95996)(393.18878, 156368.22)(394.19183, 29860.926)(395.20108, 10771.896)(396.20663, 1629.125)(397.13718, 13631.189)(398.1408, 1815.2325)(379.13678, 40575.94)(380.13995, 6050.727)	7.978
7-hydroxy-2-oxindole-3-acetate	323623	1262715	308594	134432	130081	333202	199800	169651	1361322	1004353	101720	712086	402291	537082	355891	178323	228379	145703	231878	1	7-HYDROXY-2-OXINDOLE-3-ACETIC-ACID	7-HYDROXY-2-OXINDOLE-3-ACETIC-ACID [ C10 H8 N O4, tgt=47.59, overall=47.59 ]			(229.03242, 8431.517)(230.03455, 212.55)(189.03947, 3843.7366)(190.0482, 257.06)(207.55272, 3262.9016)(225.23723, 1874.2089)(227.08427, 2212.5051)(210.06172, 8561.085)(211.0641, 347.75)(211.75465, 9424.761)(209.08157, 1774.72)	3.05226
7-hydroxy-2-oxindole-3-acetate glucoside	1611416	1	1052760	927230	695861	1589536	1	797835	1004630	1606645	223830	531158	762965	1485232	1333256	2298843	120944	1	230938	388559	7-HYDROXY-2-OXINDOLE-3-ACETIC-ACID-GLUCO	7-HYDROXY-2-OXINDOLE-3-ACETIC-ACID-GLUCO [ C16 H18 N O9, tgt=52.76, overall=52.76 ]			(371.0979, 245.73)(369.11945, 9500.027)(370.12274, 1521.3063)(391.08374, 35465.37)(392.08414, 3583.4292)(393.0786, 227.48)	6.348
7-methylxanthine	1684511	605036	75864	272811	337097	1765379	4042639	267794	2369724	1000405	3152212	648486	84014	1685750	2135171	630302	3599453	3511311	4259351	577576	7-METHYLXANTHINE	7-METHYLXANTHINE [ C6 H6 N4 O2, tgt=61.48, overall=61.48 ]			(167.58102, 40219.8)(169.05214, 39702.117)(149.5441, 745.4325)(153.0523, 3075.93)(168.52464, 3021.924)(150.38104, 1665.8217)(187.09041, 7473.323)(166.77953, 3620.5208)(189.14494, 7025.083)(171.02763, 37847.535)(172.02989, 3734.6301)	2.151
7-methylxanthosine	1	1	1	1	1	1	225284	1	1	1	221129	1	1	1	1	1	1	118191	1	1	7-METHYLXANTHOSINE	7-METHYLXANTHOSINE [ C11H15N4O6, tgt= ]			(299.0995, 9582.78)(300.0948, 2202.42)(287.1101, 419.55)(317.46774, 7128.017)(318.6372, 653.03503)(301.13046, 5102.2666)	13.1164
7-<i>O</i>-acetylsalutaridinol	4838123	3473323	3770131	2552309	2866613	4061530	1361818	3852415	4320881	4945111	1814968	4257022	4468127	4460011	4522539	3625328	1861236	1658247	1	3255203	7-O-ACETYLSALUTARIDINOL	7-O-ACETYLSALUTARIDINOL [ C21 H26 N O5, tgt=88.95, overall=88.95 ]			(355.1734, 145776.45)(356.1764, 22821.15)(357.23145, 3472.089)(358.18347, 6564.1733)	5.446
7-<i>O</i>-methylvitexin 2''-<i>O</i>-&beta;-L-rhamnoside	1	1	161020	1	1	1	258284	1	137742	1	154559	154449	276650	235636	96184	153815	1	1	1	1	7-O-METHYLVITEXIN-2-O-B-L-RHAMNOSIDE	7-O-METHYLVITEXIN-2-O-B-L-RHAMNOSIDE [ C28 H32 O14, tgt=21.75, overall=21.75 ]			(576.5182, 2640.02)(576.1777, 378.46)(611.23035, 13958.609)(612.2332, 3107.105)(592.20935, 8310.976)(593.21356, 467.53598)(597.1737, 12574.54)(598.1748, 406.88)	8.09542
8-amino-7-oxononanoate	1	1	1	1	1	1	1	1	1	1	181590	1	1	1	1	1	346389	1	284321	1	8-AMINO-7-OXONONANOATE	8-AMINO-7-OXONONANOATE [ C9 H17 N O3, tgt= ]			(205.15955, 16224.528)(206.16286, 1157.8434)(195.1036, 1439.83)	7.441
8-hydroxyquinoline	2014978	4332318	701043	778147	698984	662523	2168293	702631	905911	2016335	2123624	2000190	2263065	575099	2291471	708910	1538570	1510646	1736953	606233	8-HYDROXYQUINOLINE	8-HYDROXYQUINOLINE [ C9 H7 N O, tgt=79.60, overall=79.60 ]			(145.05013, 1429.9332)(130.0483, 1264.97)(146.06067, 63257.758)(147.06195, 5396.315)(169.5498, 16763.045)(171.0511, 2638.91)(151.0345, 33167.36)(152.0359, 5384.49)	4.1051
9,10,18-trihydroxystearate	350574	178174	1	312300	490387	243215	987196	230028	1	346091	1567915	230798	556172	369296	373545	456446	1446144	1103939	1285906	503630	91018-TRIHYDROXYSTEARATE	91018-TRIHYDROXYSTEARATE [ C18 H35 O5, tgt=51.69, overall=51.69 ]			(335.2628, 5088.008)(313.23538, 10415.589)(314.23843, 865.1311)(334.1795, 5859.3164)(335.66815, 1136.008)(349.27362, 1874.3558)(335.09473, 1985.4445)(354.90988, 426.29)(337.08795, 9237.352)(337.23355, 2688.2)	16.1601
9,10-epoxy-18-hydroxystearate	1	1	1	1	1	1	199384	1	1	234335	388297	1	1	1	484187	1	219352	298617	231317	1	910-EPOXY-18-HYDROXYSTEARATE	910-EPOXY-18-HYDROXYSTEARATE [ C18H33O4, tgt= ]			(313.2373, 1374.62)(295.22723, 17604.97)(296.2298, 2325.3457)	10.813
10,16-dihydroxypalmitate	539911	361903	399179	480405	618738	392058	11925748	351130	460454	481785	18320932	399609	554889	623002	638609	720304	1	13948434	1	548166	9--OR-1016-DIHYDROXYPALMITATE	9--OR-1016-DIHYDROXYPALMITATE [ C16 H31 O4, tgt=53.37, overall=53.37 ]			(269.2094, 13207.6)(270.2126, 521.12)(305.2651, 478356.47)(306.27182, 61277.5)(307.2794, 5273.36)(290.75208, 3134.8154)(290.4542, 1005.888)(291.59232, 3072.173)(292.2612, 6543.63)(311.22214, 214.97668)(293.2115, 2262.1863)(294.2153, 352.96)	16.3152
acenaphthenequinone	1	179439	1	1	1	1	1	1	1	1	113193	1	1	1	1	1	1	1	1	1	ACENAPHTHENEQUINONE	ACENAPHTHENEQUINONE [ C12H6O2, tgt= ]			(170.0434, 3632.66)(184.0654, 6940.8447)(185.0678, 7513.95)(192.0358, 1157.54)	3.60467
acetylcholine	127454	82740	99019	1	117727	96872	649242	1	1	217902	601495	1	123317	111639	148919	126852	682332	553941	784266	1	ACETYLCHOLINE	ACETYLCHOLINE [ C7 H16 N O2, tgt=45.34, overall=45.34 ]			(146.11797, 13244.409)(147.11858, 1140.4417)(131.11836, 1463.525)(131.11894, 2353.396)(151.09535, 337.88)	1.872
<i>N</i>-acetyl-L-glutamate	1	383256	1	669873	654889	1	271434	1	942687	1	301045	930296	720689	1	813093	1	296168	241083	350932	361294	ACETYL-GLU	ACETYL-GLU [ C7 H9 N O5, tgt=60.05, overall=60.05 ]			(205.08125, 23825.176)(206.08128, 1898.2344)(188.07112, 259585.47)(189.07263, 51392.49)(190.0761, 5018.67)	6.83143
acetyl phosphate	1	1	127458	88528	1	83904	1	195465	1	1	1	90491	1	1	124253	1	1	1	1	1	ACETYL-P	ACETYL-P [ C2 H3 O5 P, tgt=11.76, overall=11.76 ]			(137.99176, 9830.103)(138.99086, 1499.4349)	1.442
<i>O</i>-acetyl-L-serine	5361009	2170445	3471066	2550511	2988889	1853459	1636909	2124963	2205900	4427136	661948	987300	3487445	1440796	9623281	4020820	1434722	346556	254823	1607871	ACETYLSERINE	ACETYLSERINE [ C5 H9 N O4, tgt=80.63, overall=80.63 ]			(150.05797, 8033.974)(152.06833, 5539.239)(131.04555, 7535.286)(133.0509, 326.2)(148.06096, 14565.56)(149.06482, 215.5025)(130.05045, 34747.21)(131.0465, 2812.229)(132.04495, 546.275)(166.08519, 4894.685)(147.07683, 12690.068)(170.04637, 1150.0116)(154.09796, 6628.7075)(155.37679, 3132.41)(156.04356, 39545.617)(157.0454, 5933.832)	1.848
adenine	3343883	1777908	3358345	3713049	3412325	2817071	2424547	3815188	3838617	3188628	2428771	2972005	4357025	1400788	1	1	2269831	2580971	1668200	4111221	ADENINE	ADENINE [ C5 H5 N5, tgt=74.72, overall=74.72 ]			(138.05579, 465571.6)(139.12015, 38043.29)(140.06114, 4474.8745)(136.06302, 182443.39)(137.06404, 13595.338)(154.75362, 1799.3448)(158.0414, 7249.54)	2.074
adenine-ring	3343883	1777908	3358345	3713049	3412325	2817071	2424547	3815188	3838617	3188628	2428771	2972005	4357025	1400788	1	1	2269831	2580971	1668200	4111221	ADENINE-RING	ADENINE-RING [ C5 H5 N5, tgt=74.72, overall=74.72 ]			(138.05579, 465571.6)(139.12015, 38043.29)(140.06114, 4474.8745)(136.06302, 182443.39)(137.06404, 13595.338)(154.75362, 1799.3448)(158.0414, 7249.54)	2.074
adenosine	15442991	13889277	16136735	15451799	8972511	12471202	17919894	11149954	16193647	20151044	12335686	13356891	16468634	5094980	14735471	8228002	16614025	16165679	14389389	13885273	ADENOSINE	ADENOSINE [ C10 H13 N5 O4, tgt=91.47, overall=91.47 ]			(267.0982, 7321.5845)(252.08783, 867.7399)(268.1052, 512054.5)(269.10773, 57775.055)(270.10822, 7747.5923)(286.1396, 3202.804)(287.1425, 635.33)(270.1322, 1672.4199)(291.03418, 5697.02)(273.0827, 1133.934)(274.0862, 247.95667)	2.092
ADP-D-ribose	1	1	1	1	214218	1	1	1	1	1	1	1	175028	1	1	182749	1	1	1	175246	ADENOSINE_DIPHOSPHATE_RIBOSE	ADENOSINE_DIPHOSPHATE_RIBOSE [ C15 H21 N5 O14 P2, tgt= ]			(539.0501, 10689.172)(585.0629, 1691.4825)	18.99
adenosine 5'-carboxamide	249491	1	246560	112975	918265	201447	142506	90586	120320	491952	97276	1528894	474552	110740	211311	174174	113410	123278	170456	157104	ADENOSINE-5-CARBOXAMIDE	ADENOSINE-5-CARBOXAMIDE [ C10 H12 N6 O4, tgt=57.99, overall=57.99 ]			(282.98557, 2932.2734)(285.1023, 1116.43)(263.0766, 354.21)(284.09988, 12391.823)(285.10297, 1205.5366)(267.89322, 114419.87)(268.10556, 385823.16)(300.74982, 7485.965)(303.14124, 344.66998)(282.12018, 2352.5784)(303.35098, 7394.7646)(304.08185, 995.512)(305.072, 1051.43)(289.362, 1766.4601)(289.41287, 2130.7168)	2.124
<i>S</i>-adenosyl-L-homocysteine	574338	261939	112391	141505	202057	142847	90020	92891	515534	520988	1	502949	275319	263317	323528	400545	100629	117654	96360	200957	ADENOSYL-HOMO-CYS	ADENOSYL-HOMO-CYS [ C14 H20 N6 O5 S, tgt=71.25, overall=71.25 ]			(390.1169, 2728.94)(368.20966, 3560.157)(367.1221, 1813.31)(369.1192, 16952.412)(370.12262, 1690.6041)(405.16248, 47634.273)(405.9148, 22047.662)(407.9657, 7914.88)(408.1665, 5224.52)(385.0803, 10168.908)(387.48615, 1906.7567)(388.1512, 2299.22)(391.59583, 3266.0)	5.29665
adipate	1988863	551457	4587451	3466047	3526112	3741334	4505743	4046882	5215927	2115084	4337335	2330735	2549188	5155289	1521381	5138260	4285151	3911417	4557054	3433775	ADIPATE	ADIPATE [ C6 H8 O4, tgt=71.11, overall=71.11 ]			(127.0375, 6212.97)(131.0451, 799.73)(145.05064, 29110.262)(146.05618, 422.8879)(127.03929, 27534.064)(128.04347, 168.17332)(162.53072, 7218.072)(164.0791, 481.27747)(144.066, 8396.203)(168.23372, 2547.588)(149.02388, 63422.617)(150.02692, 5193.424)	8.96805
ADP	1	1	214506	1	1	1	1	1	89531	1	1	1	79203	1	1	89083	1	1	1	1	ADP	ADP [ C10 H12 N5 O10 P2, tgt= ]			(424.01294, 3102.3901)(427.0175, 417.59)(446.9883, 5300.9165)	1.982
ADP-&alpha;-D-glucose	1	1	1	1	101549	1	1	1	1	1	1	1	79176	1	1	1	1	1	1	86248	ADP-D-GLUCOSE	ADP-D-GLUCOSE [ C16 H23 N5 O15 P2, tgt= ]			(569.06903, 3055.5466)(570.0517, 3861.8333)(614.0771, 401.37)	18.916
5-amino-1-(5-phospho-D-ribosyl)imidazole-4-carboxamide	1281748	502351	291957	367303	646233	240515	428419	347211	615227	1875604	121040	865720	1064556	162371	1237008	231887	268954	346932	193964	404657	AICAR	AICAR [ C9 H13 N4 O8 P, tgt=12.02, overall=12.02 ]			(339.06226, 5820.376)(320.21173, 3493.0833)(322.0499, 1390.54)(337.1812, 21840.977)(338.18246, 5670.716)(339.06122, 2044.5316)(320.55136, 1604.8734)(321.0397, 19695.55)(322.0502, 672.81)(336.1355, 3169.5088)(338.0662, 1991.93)(362.24622, 1365.6571)	1.676
alendronate	1	1	1	1	1	1	102603	1	279820	1	242902	1	1	1	1	1	72975	208181	1	1	ALENDRONATE	ALENDRONATE [ C4 H12 N O7 P2, tgt= ]			(250.018, 3132.7976)(231.99747, 3645.8425)(249.03935, 27589.557)(251.03865, 2124.5935)(272.80945, 1337.726)	1.936
alizarin	107591	1	1	1	243731	1	277189	1	120254	1	196018	1	1	154938	113716	123894	110117	250851	370554	1	ALIZARIN	ALIZARIN [ C14 H8 O4, tgt=38.61, overall=38.61 ]			(244.25778, 731.846)(245.0514, 812.98)(222.53084, 6360.0654)(243.85881, 4180.0244)(225.0438, 743.1)(259.7465, 937.25665)(261.09, 253.32)(245.0771, 1033.47)(249.0387, 582.31)	1.543
allantoate	111440	138617	600347	225848	185500	177569	167556	101912	793173	126714	190766	1	105856	472497	98810	641154	184502	120424	115720	91415	ALLANTOATE	ALLANTOATE [ C4 H7 N4 O4, tgt=30.06, overall=30.06 ]			(177.0547, 5447.34)(160.0419, 1814.46)(160.0382, 302.93)(177.05637, 10855.29)(158.04135, 9370.457)(193.08395, 8185.6963)(177.0691, 9760.425)(200.48866, 8605.386)(201.4445, 3891.934)(184.74617, 4762.764)(185.03337, 2450.4675)	3.01185
allocryptopine	272712	217937	148860	150396	130869	1	461917	189615	174878	1	332877	287756	221517	1	950846	122046	307175	329195	280116	204603	ALLOCRYPTOPINE	ALLOCRYPTOPINE [ C21 H23 N O5, tgt=57.78, overall=57.78 ]			(370.33398, 6200.4033)(370.1694, 128.02)(351.39386, 1527.015)(371.8353, 6086.4683)(373.18268, 4893.0537)(374.18634, 592.435)(353.77267, 3739.193)(354.83505, 1883.3301)(355.1715, 6097.5435)(356.1748, 180.89)(387.92667, 3157.0798)(370.1884, 19844.014)(374.1881, 11566.64)(376.1453, 6673.508)(378.14917, 810.05597)	6.469
allolactose	1033668	1	920103	929797	789499	883480	12365524	900354	811469	1050290	11804705	1	1	4410196	4704845	7726699	1	11481850	12811718	4005349	ALLOLACTOSE	ALLOLACTOSE [ C12 H22 O11, tgt=75.22, overall=75.22 ]			(347.1383, 211.1)(325.11475, 133493.36)(326.11774, 15510.336)(327.12003, 4715.4663)(363.289, 1741.39)(364.1646, 145.67)(365.10043, 4581.351)(366.1159, 1141.14)	8.182
all-<i>trans</i>-heptaprenyl diphosphate	1	213747	1	1	192790	1	822275	1	1	210868	1114205	715557	205667	1	1	1	357683	472142	924927	214833	ALL-TRANS-HEPTAPRENYL-DIPHOSPHATE	ALL-TRANS-HEPTAPRENYL-DIPHOSPHATE [ C35 H57 O7 P2, tgt= ]			(653.3811, 6734.1553)(654.3848, 347.39)(652.64844, 14498.609)(653.6513, 4570.9727)(679.3661, 381.16998)(656.3387, 28462.312)(657.34033, 3535.6719)	13.3796
all-<i>trans</i>-hexaprenyl diphosphate	3604126	1723613	1869485	1342082	1688002	2630455	203699	1714901	1759614	3268497	164387	4993041	4749730	2161772	4363551	4580883	189392	195903	1	1682584	ALL-TRANS-HEXAPRENYL-DIPHOSPHATE	ALL-TRANS-HEXAPRENYL-DIPHOSPHATE [ C30 H49 O7 P2, tgt=69.10, overall=69.10 ]			(587.30194, 1591.195)(566.27277, 4863.297)(587.3027, 2450.6934)(588.3081, 440.59)(607.7139, 48621.85)(608.413, 20183.75)(609.29785, 3292.6055)	21.4712
geranylfarnesyl diphosphate	1048828	192043	880617	196330	167193	196178	504236	1258329	1636431	144689	307787	840952	983684	1370804	1526271	898448	729086	1356602	498789	1007134	ALL-TRANS-PENTAPRENYL-DIPHOSPHATE	ALL-TRANS-PENTAPRENYL-DIPHOSPHATE [ C25 H41 O7 P2, tgt=62.91, overall=62.91 ]			(518.9059, 17658.9)(520.24493, 4262.0303)(521.2475, 644.5533)(500.42426, 2339.778)(502.5708, 716.5967)(503.2462, 509.19)(519.2417, 28705.299)(520.2447, 5906.013)(521.24744, 245.34)(502.44736, 1520.832)(535.16766, 7690.3594)(537.2708, 22922.156)(538.0237, 7071.1577)(538.22485, 4139.7793)(539.2289, 2272.585)(525.77954, 2092.7832)	7.219
(<i>S</i>)-2-amino-6-oxohexanoate	8200191	6676535	143481	154016	6036221	7055426	113490	387791	148878	7458523	2948171	5793642	155388	203799	9418132	190461	4068068	3084756	98649	459460	ALLYSINE	ALLYSINE [ C6 H11 N O3, tgt=49.54, overall=49.54 ]			(147.0768, 6752.0894)(150.8446, 712.65)(164.10744, 17714.5)(165.1125, 7367.49)(168.06384, 7332.164)(151.05702, 124334.71)(152.11281, 8015.564)(152.05911, 1391.09)	2.257
&alpha;-D-galactopyranose	1	1	1	1	579474	1	4034488	714080	807070	1381265	1952619	1057083	2617141	1	2962709	1	992016	1541347	1	1	ALPHA-D-GALACTOSE	ALPHA-D-GALACTOSE [ C6H12O6, tgt= ]			(183.50024, 3534.077)(184.0742, 4771.985)(164.80627, 6511.4673)(166.0583, 486.96)(184.0737, 5368.1196)(163.06088, 2183.1716)(198.09723, 1893.1017)(180.08766, 3558.723)(203.05348, 47573.883)(204.05641, 1929.389)(205.04846, 326.99002)(188.18808, 1516.0829)(189.0462, 428.8)	1.828
&alpha;-D-glucose 6-phosphate	297258	1	3774117	220646	1	294373	3306090	3540171	289199	354028	2777358	198287	352428	4301643	253161	197720	3901092	3238657	3815342	1	ALPHA-GLC-6-P	ALPHA-GLC-6-P [ C6 H11 O9 P, tgt=61.60, overall=61.60 ]			(259.01797, 5894.0796)(260.0147, 622.77)(259.02283, 10054.85)(241.00557, 267274.0)(242.00687, 92485.8)(278.8509, 1357.0569)(259.04297, 18202.889)(260.04657, 1387.8267)(262.05014, 417.24332)	2.03871
&alpha;-D-glucopyranose	2884803	1	1	1	579474	1	4034488	714080	807070	1381265	1952619	1057083	2617141	2835783	2962709	1	992016	1541347	1	1	ALPHA-GLUCOSE	ALPHA-GLUCOSE [ C6 H12 O6, tgt=76.73, overall=76.73 ]			(183.50024, 3534.077)(184.0742, 4771.985)(164.80627, 6511.4673)(166.0583, 486.96)(184.0737, 5368.1196)(163.06097, 13884.23)(164.06476, 1937.78)(198.09723, 1893.1017)(180.08766, 3558.723)(203.05348, 47573.883)(204.05641, 1929.389)(205.04846, 326.99002)(188.18808, 1516.0829)(189.0462, 428.8)	2.5222
&alpha;-lactose	1033668	1	920103	929797	789499	883480	12365524	900354	811469	1050290	11804705	1	1	4410196	4704845	7726699	1	11481850	12811718	4005349	Alpha-lactose	Alpha-lactose [ C12 H22 O11, tgt=75.22, overall=75.22 ]			(347.1383, 211.1)(325.11475, 133493.36)(326.11774, 15510.336)(327.12003, 4715.4663)(363.289, 1741.39)(364.1646, 145.67)(365.10043, 4581.351)(366.1159, 1141.14)	8.182
&alpha;-maltose	1033668	1	920103	929797	789499	883480	12365524	900354	811469	1050290	11804705	1	1	4410196	4704845	7726699	1	11481850	12811718	4005349	ALPHA-MALTOSE	ALPHA-MALTOSE [ C12 H22 O11, tgt=75.22, overall=75.22 ]			(347.1383, 211.1)(325.11475, 133493.36)(326.11774, 15510.336)(327.12003, 4715.4663)(363.289, 1741.39)(364.1646, 145.67)(365.10043, 4581.351)(366.1159, 1141.14)	8.182
4&alpha;-methyl-5&alpha;-ergosta-8,14,24(28)-trien-3&beta;-ol	1	1	1032476	1140804	1	1056867	1	1375055	1	1	1453779	1	1	1562291	1	1178775	1	1	1	5204394	ALPHA-METHYL-5-ALPHA-ERGOSTA	ALPHA-METHYL-5-ALPHA-ERGOSTA [ C29 H46 O, tgt=11.88, overall=11.88 ]			(435.3638, 3973.26)(415.32635, 38725.938)(416.33008, 6934.2773)(417.3525, 5297.88)	7.805
&alpha;-methyl-tyrosine	1331771	187303	1	1173159	593565	1	1290271	1	1	1319998	1472981	1172693	1328073	1222148	1512221	1222413	1561090	1	1	906594	ALPHA-METHYL-TYROSINE	ALPHA-METHYL-TYROSINE [ C10 H13 N O3, tgt=45.28, overall=45.28 ]			(196.0975, 433.09747)(179.58783, 3719.985)(180.0889, 4472.66)(198.93831, 342.60336)(180.00581, 3174.2996)(182.09737, 1524.0868)(215.12639, 856.25507)(217.1338, 1181.78)(198.98328, 327.85284)(221.08968, 1098.345)(222.0955, 41.31)(202.07732, 8989.562)(202.41118, 490.1133)(203.08084, 748.07495)	3.1256
&alpha;-naphthaleneacetamide	1177903	1925410	1203265	1623288	1271098	832201	1	1104001	1347695	1600257	1	1252955	1176565	578586	1	1083652	1	1	1	1105636	ALPHA-NAPHTHALENEACETAMIDE	ALPHA-NAPHTHALENEACETAMIDE [ C12 H11 N O, tgt=64.81, overall=64.81 ]			(167.07095, 54154.902)(168.07397, 4305.3857)	7.94311
&alpha;-tocopherol	1068354	256586	382382	479322	972411	1151444	717426	523530	693279	563108	1025706	712823	404537	859966	423299	355643	689106	708666	762093	450704	ALPHA-TOCOPHEROL	ALPHA-TOCOPHEROL [ C29 H50 O2, tgt=65.94, overall=65.94 ]			(430.37555, 2404.69)(435.35947, 16788.254)(436.36264, 2799.731)	23.325
L-mimosine	173326	306591	89012	174125	97832	114964	1	103785	114382	261147	1	129499	186273	1	172152	116760	1	1	1	1	AMINO-ETCETERA-PYRIDIN-1-YL-PROPANOATE	AMINO-ETCETERA-PYRIDIN-1-YL-PROPANOATE [ C8 H9 N2 O4, tgt=49.87, overall=49.87 ]			(181.04591, 2310.1758)(185.06737, 5514.4307)(217.0983, 24595.453)(218.10136, 2288.9368)(197.08151, 10017.092)(198.0836, 303.97)(204.0379, 760.0)	5.7676
4-amino-2-methyl-5-(phosphooxymethyl)pyrimidine	1	1	1	1	1	1	213176	1	1	1	223149	1	1	1	1	1	1	197118	1	1	AMINO-HYDROXYMETHYL-METHYL-PYR-P	AMINO-HYDROXYMETHYL-METHYL-PYR-P [ C6 H8 N3 O4 P, tgt= ]			(217.02043, 9328.733)(219.72253, 1333.62)(220.06, 1816.54)(243.01833, 834.94336)(245.0327, 9204.61)	2.203
6-(hydroxymethyl)-7,8-dihydropterin	933388	2798097	3000321	540927	2983061	808379	601238	255948	3944834	387047	1	197245	355995	592575	367478	420320	1	2232292	944251	2787207	AMINO-OH-HYDROXYMETHYL-DIHYDROPTERIDINE	AMINO-OH-HYDROXYMETHYL-DIHYDROPTERIDINE [ C7 H9 N5 O2, tgt=39.91, overall=39.91 ]			(196.77278, 1958.8625)(177.06798, 7580.5547)(178.075, 275.98)(197.08154, 2929.1602)(180.95262, 3606.746)(182.74916, 1482.2733)(183.08466, 296.575)(213.10919, 38.760002)(195.76955, 133.40001)(219.56761, 1442.8325)(221.35255, 1571.5586)(222.0708, 149.07666)(202.69267, 2755.018)(204.0596, 45.59)	5.34984
5-amino-6-(D-ribitylamino)uracil	316994	3886405	1809234	166335	219073	1	155141	1645863	1840106	272066	1	3892199	442734	292180	456695	1	1526160	1	1	2553289	AMINO-RIBOSYLAMINO-1H-3H-PYR-DIONE	AMINO-RIBOSYLAMINO-1H-3H-PYR-DIONE [ C9 H16 N4 O6, tgt=45.18, overall=45.18 ]			(276.44046, 6534.4497)(277.1128, 262.04)(259.3445, 17984.07)(260.09686, 1966.875)(282.11957, 2376.3435)(264.1082, 375.19)(280.1394, 558.98)(300.10034, 10612.127)(300.09567, 3702.12)(282.62955, 4298.52)(284.85162, 2812.015)(285.1024, 769.62)	6.3024
AMP	1	1	101872	120594	1	114475	1	1	168923	139172	1	1	126888	113361	1	98252	1	1	1	1	AMP	AMP [ C10 H12 N5 O7 P, tgt= ]			(346.0556, 545.72)(330.3713, 418.75668)(349.06235, 3161.2668)(351.0695, 9750.99)(332.5585, 1674.1533)(333.0592, 1898.26)(348.07104, 4919.2236)(350.0282, 6874.753)	1.894
AMP group	1	1	101872	120594	1	114475	1	1	168923	139172	1	1	126888	113361	1	98252	1	1	1	1	AMP-GROUP	AMP-GROUP [ C10 H12 N5 O7 P, tgt= ]			(346.0556, 545.72)(330.3713, 418.75668)(349.06235, 3161.2668)(351.0695, 9750.99)(332.5585, 1674.1533)(333.0592, 1898.26)(348.07104, 4919.2236)(350.0282, 6874.753)	1.894
androst-4-ene-3,17-dione	1	1	1	1	1	1	1	1	1	1	1	1	1	1	91011	1	1	1	1	1	ANDROST4ENE	ANDROST4ENE [ C19H26O2, tgt= ]			(274.2018, 1703.25)(291.1741, 5987.93)	5.223
anthranilate	1	1	1	1	1	437807	198009	1	1	1	136066	1	1	1	1	1	1	109280	1	1	ANTHRANILATE	ANTHRANILATE [ C7H6NO2, tgt= ]			(119.02901, 9227.01)(136.06223, 11681.908)(163.03943, 259019.22)(164.04263, 22380.477)(145.0284, 303.17)	3.662
2',4,4',6'-tetrahydroxychalcone	2123141	1	1234138	1202027	1	1090050	1	545919	1243540	101513	1	1517371	1201114	1140552	319495	1299693	246691	1	374162	1	APIGENIN	APIGENIN [ C15 H12 O5, tgt=32.94, overall=32.94 ]			(273.0826, 9302.863)(274.0836, 3339.28)(292.30682, 73260.1)(292.10175, 18160.695)(293.104, 4276.395)(274.52658, 8148.5483)(274.76428, 2174.9966)(296.0674, 23087.56)(297.06995, 1850.7935)(298.06595, 1682.4766)(280.38388, 5327.6865)	3.3054
<i>aldehydo</i>-D-arabinose 5-phosphate	415824	653221	571209	608683	346821	479951	1	457199	649630	527353	1	301201	506814	537171	352928	592456	1	1	1	333299	ARABINOSE-5P	ARABINOSE-5P [ C5 H9 O8 P, tgt=52.30, overall=52.30 ]			(233.79099, 1491.8713)(212.00894, 67056.445)(213.80641, 2156.1282)(214.00395, 2388.9365)(247.04385, 24856.973)(248.64458, 9406.562)(249.6455, 7013.251)(250.64497, 1581.0594)(251.04352, 1421.7233)(228.2248, 1601.2126)(232.04108, 1501.21)(232.9891, 25759.89)	1.873
arachidate	2868870	1082300	1638217	2643690	1388473	2891545	4462445	2680156	2140308	2062538	4136280	3438646	1888318	3469653	3114448	1903968	5132055	3386175	4906582	1621309	ARACHIDIC_ACID	ARACHIDIC_ACID [ C20 H39 O2, tgt=81.94, overall=81.94 ]			(329.32806, 75306.5)(330.3309, 13664.578)(331.3339, 739.2378)	4.774
arachidonate	1	1	1	1	1	1	1866382	1	1	1	3594383	1	1	1	1	1	1	1967391	2328993	1	ARACHIDONIC_ACID	ARACHIDONIC_ACID [ C20H31O2, tgt= ]			(306.2403, 2244.3525)(307.2425, 191.68)(321.25928, 36904.734)(322.262, 2770.01)(313.23465, 790.7)	15.548
L-arginine	1	1	467520	1	1	1	1	1	1	1093574	530755	744082	381814	621456	1070765	1	356187	1	282557	1	ARG	ARG [ C6 H15 N4 O2, tgt=27.18, overall=27.18 ]			(175.11945, 14903.941)(176.1266, 366.05)(159.10947, 11520.466)(161.1159, 428.945)(158.11816, 16332.15)(159.1217, 1580.77)(175.14375, 235.48332)(199.1085, 1989.71)	7.78582
L-ascorbate	656857	1226449	827408	1036298	1050781	1094535	88854	67093	1020929	1198800	290490	898474	1276518	616382	728692	1357738	597650	1	402715	1115638	ASCORBATE	ASCORBATE [ C6 H7 O6, tgt=75.62, overall=75.62 ]			(175.02267, 37816.45)(176.02623, 1351.4343)(177.02411, 568.015)(157.01283, 17303.49)(159.0285, 5426.1123)(198.07495, 3060.4082)(198.51715, 1468.0349)(180.63358, 3357.8257)	2.044
L-asparagine	245725	1	226376	216259	197118	182525	198367	191103	315086	255568	178586	241519	207744	259358	395515	222113	231859	183351	214637	162068	ASN	ASN [ C4 H8 N2 O3, tgt=43.36, overall=43.36 ]			(136.06284, 28111.09)(137.0653, 3405.92)(114.0427, 907.42)(133.0604, 3513.51)(134.0817, 3348.185)(155.04327, 14064.362)(156.0458, 2086.67)(140.40613, 8775.519)(141.04036, 8486.599)	1.405
ATP	1	1	487587	1	1	1	1	1	1	1	1	1	1	1	1	1	1	1	1	1	ATP	ATP [ C10 H12 N5 O13 P3, tgt= ]			(505.007, 6977.39)(506.0093, 224.35)	2.044
ATP&gamma;S	1	1	1	1	1	1	1	1	1	1	264430	1	1	1	1	1	185324	1	104907	1	ATPGAMMAS	ATPGAMMAS [ C10 H12 N5 O12 P3 S, tgt= ]			(538.964, 11851.6455)(518.9754, 12106.703)(519.9757, 2306.635)(520.9641, 1368.74)	17.884
baccatin III	882602	600635	576406	543873	409491	644957	1709380	535273	655658	948940	1289010	696210	684283	690970	836647	691632	1104157	1427227	1678467	1	BACCATIN-III	BACCATIN-III [ C31 H38 O11, tgt=43.19, overall=43.19 ]			(569.2551, 2350.28)(586.2703, 8188.7)(587.2733, 1318.898)(591.2111, 38903.305)(592.21405, 9739.398)(593.2199, 1528.5422)	6.733
bacimethrin	184183	331033	326273	402422	461030	294378	200792	475752	388768	180236	203417	396551	275071	1	463785	1	77814	186967	1	556451	BACIMETHRIN	BACIMETHRIN [ C6 H9 N3 O2, tgt=74.70, overall=74.70 ]			(156.92912, 3309.0957)(157.7393, 1457.7067)(139.26071, 38158.69)(142.0706, 1613.25)(156.07698, 5272.3726)(157.07295, 1055.785)(140.32018, 1048.53)(160.1062, 4854.414)(182.067, 322.04)(165.05545, 12621.619)	2.07
benzaldehyde	526992	1	610045	1	1	1	224058	3401887	1456841	334342	2320427	393915	1	1	2532948	1	1	7496170	1	1	BENZALDEHYDE	BENZALDEHYDE [ C7 H6 O, tgt=47.36, overall=47.36 ]			(107.04451, 22836.9)(110.860435, 422.33)(124.0759, 7764.6)(132.0392, 139.64667)(113.02429, 127.409996)	1.74167
benzimidazole	287477	1	1	1	1	1	1	1	191086	331933	1	1	1	1	1	1	1	1	1	1	BENZIMIDAZOLE	BENZIMIDAZOLE [ C7 H6 N2, tgt=79.41, overall=79.41 ]			(120.7324, 2354.6633)(121.567245, 3814.2249)(122.0691, 312.52)(141.04051, 8551.663)	1.412
benzoate	909482	1	1443573	1353211	85575	1487532	1	1613795	1459144	2484628	1	1630373	1	2529185	115433	1285148	80012	1	78197	1893077	BENZOATE	BENZOATE [ C7 H5 O2, tgt=48.87, overall=48.87 ]			(125.16434, 3952.5625)(126.0406, 417.7)(123.44058, 12392.129)(124.04153, 4180.7227)(139.05942, 37435.6)(140.0569, 396.74)(123.27065, 18671.955)(146.62677, 8620.071)(145.0183, 332.75)(129.52066, 9733.96)	5.246
benzyl alcohol	333270	153387	228875	208729	184211	177619	208192	244686	333070	384219	85473	438920	228970	250056	336146	162273	273746	144313	114915	177511	BENZYL-ALCOHOL	BENZYL-ALCOHOL [ C7 H8 O, tgt=59.36, overall=59.36 ]			(110.0607, 24640.914)(111.0631, 1378.11)(126.091446, 686.005)(108.08125, 2561.49)(131.54723, 23601.42)(132.04462, 1565.0106)(113.610725, 2959.4492)	1.461
desulfoglucotropaeolin	358848	272214	293208	322075	1	172554	466612	297575	265454	478090	350208	235904	397908	1	576264	183591	379130	274906	295267	1	BENZYL-DESULFOGLUCOSINOLATE	BENZYL-DESULFOGLUCOSINOLATE [ C14 H19 N O6 S, tgt=12.70, overall=12.70 ]			(331.1015, 361.87)(331.1031, 975.005)(347.13135, 5687.295)(329.12122, 5522.7197)(339.08395, 1679.6632)	3.708
berbamunine	589622	1	256864	165892	1	532699	1	1	269270	470282	1	358711	689228	266117	786107	333625	1	1	1	1	BERBAMUNINE	BERBAMUNINE [ C36 H42 N2 O6, tgt=49.22, overall=49.22 ]			(623.2879, 45390.11)(624.2909, 16598.283)(625.2935, 2297.779)	23.16
berberine	222931	109304	1	1	1	87526	1	1	1	734299	556383	128683	300947	1	914463	117453	627827	249484	213656	1	BERBERINE	BERBERINE [ C20 H18 N O4, tgt=64.18, overall=64.18 ]			(336.1215, 19807.22)(337.1247, 4014.6113)(356.1594, 6318.3364)(358.1733, 38655.74)	9.493
bergaptol	198316	1	1	1	1	161576	1	1	180194	182065	1	1	174674	181730	264188	1	1	1	1	1	BERGAPTOL	BERGAPTOL [ C11 H6 O4, tgt=44.01, overall=44.01 ]			(220.05493, 7989.6685)(203.05432, 11581.743)(229.0329, 1571.03)	3.012
bestatin	1	1	1	1	1	1	1	1	1	1	297319	1	1	1	1	1	289126	229216	1	1	BESTATIN	BESTATIN [ C16H24N2O4, tgt= ]			(326.2004, 11375.664)(309.2041, 8430.35)	18.16
&beta;-D-fructofuranose	1	1	1	1	579474	1	4034488	714080	807070	1381265	1952619	1057083	2617141	1	2962709	1	992016	1541347	1	1	BETA-D-FRUCTOSE	BETA-D-FRUCTOSE [ C6H12O6, tgt= ]			(183.50024, 3534.077)(184.0742, 4771.985)(164.80627, 6511.4673)(166.0583, 486.96)(184.0737, 5368.1196)(163.06088, 2183.1716)(198.09723, 1893.1017)(180.08766, 3558.723)(203.05348, 47573.883)(204.05641, 1929.389)(205.04846, 326.99002)(188.18808, 1516.0829)(189.0462, 428.8)	1.828
&beta;-D-xylopyranose	1048929	6785845	847171	906393	987343	1010305	543032	879347	1043209	1264960	750668	794695	1099030	7412115	1326810	970556	623471	531872	412631	922006	BETA-D-XYLOSE	BETA-D-XYLOSE [ C5 H10 O5, tgt=66.31, overall=66.31 ]			(151.85777, 54483.367)(152.80956, 3677.0923)(152.0581, 1224.31)(133.89182, 7813.951)(153.5686, 2538.3826)(133.55286, 2088.9988)(168.08765, 1724.17)(150.22757, 17697.045)(151.15779, 459.68387)(174.04584, 1177.4974)(157.84055, 3095.2559)	2.028
glycine betaine	3197554	1411882	20317424	4812012	1462307	1173925	1764980	2036073	27444966	2051904	1387029	2895622	2317465	22663920	998902	24916464	1181791	908278	1693346	1839081	BETAINE	BETAINE [ C5 H11 N O2, tgt=81.54, overall=81.54 ]			(121.0846, 13476.35)(118.08687, 213785.47)(119.09015, 10854.5625)(120.09172, 2269.2825)(100.07597, 652.4825)(121.11195, 33604.91)(140.06824, 817.2422)	1.872
&beta;-L-arabinopyranose	1048929	6785845	847171	906393	987343	1010305	543032	879347	1043209	1264960	750668	794695	1099030	7412115	1326810	970556	623471	531872	412631	922006	BETA-L-ARABINOSE	BETA-L-ARABINOSE [ C5 H10 O5, tgt=66.31, overall=66.31 ]			(151.85777, 54483.367)(152.80956, 3677.0923)(152.0581, 1224.31)(133.89182, 7813.951)(153.5686, 2538.3826)(133.55286, 2088.9988)(168.08765, 1724.17)(150.22757, 17697.045)(151.15779, 459.68387)(174.04584, 1177.4974)(157.84055, 3095.2559)	2.028
&beta;-tocopherol	170282432	151270464	153389200	161573056	151354336	163065888	124267024	170986544	153443392	1	124659728	150029984	149617184	175040032	171682880	164784624	116896048	118487224	127885232	159673984	BETA-TOCOPHEROL	BETA-TOCOPHEROL [ C28 H48 O2, tgt=52.38, overall=52.38 ]			(416.3554, 2202068.8)(417.35898, 631802.25)(418.36172, 90034.35)(419.36417, 8439.697)(398.34387, 3807.3003)	8.804
(<i>Z,Z</i>)-bilirubin-IX &alpha;	98869	1	1	1	1	1	91863	1	1	1	1	1	1	1	1	1	1	260182	110143	1	BILIRUBIN	BILIRUBIN [ C33 H34 N4 O6, tgt=2.58, overall=2.58 ]			(585.2544, 4606.44)(566.2501, 1000.0801)(569.2613, 1244.04)(569.262, 393.39)(583.9438, 1470.3633)(586.2827, 6004.44)(587.3018, 2770.07)	7.915
(<i>Z,Z</i>)-biliverdin-IX &alpha;	421561	233135	250690	671214	1	410949	222159	296858	434496	1101929	259118	356471	339888	211933	376098	486655	144313	91267	135260	95205	BILIVERDINE	BILIVERDINE [ C33 H32 N4 O6, tgt=22.68, overall=22.68 ]			(585.23303, 1510.02)(567.1366, 7539.126)(566.4499, 1616.6101)(598.24927, 3529.3894)(599.2532, 1425.875)(585.264, 1511.77)(603.20593, 18933.506)(604.2092, 4801.06)(605.2103, 1748.2949)(589.2101, 5616.91)(590.2141, 316.49)	7.94537
biotin	3162743	2746129	3325518	2815756	3974891	4042765	3552579	3461489	3828293	3140857	1015992	3878488	779117	922333	3238032	1138544	1143304	3946393	4402384	3079449	BIOTIN	BIOTIN [ C10 H15 N2 O3 S, tgt=51.05, overall=51.05 ]			(261.11072, 61598.926)(262.11386, 7389.548)	10.996
lipid X	982580	844792	962145	523178	499367	1009131	7142717	1046762	771943	799085	7526270	1227435	371790	669082	440808	751087	5840877	4767047	7194601	579065	BISOHMYR-GLUCOSAMINYL-1P	BISOHMYR-GLUCOSAMINYL-1P [ C34 H64 N O12 P, tgt=70.25, overall=70.25 ]			(710.4334, 27605.438)(711.44025, 10781.439)(712.439, 1894.1439)(691.4044, 6637.699)(692.4076, 2030.3867)(693.4193, 499.04)(698.446, 494.87)(731.4822, 3093.985)(714.4412, 128.16)(735.4299, 3069.51)(736.4343, 1183.41)(715.401, 59983.688)(716.40424, 20864.66)(717.71, 5053.772)(718.87537, 1394.7854)(719.9017, 850.22003)(720.403, 558.445)	18.21
buthionine sulfoximine	18054588	13962402	6336100	6603093	6071709	5600526	20064016	6189257	8372653	15767921	20111668	17232060	19130564	4978940	1	6347305	14162526	14325742	15359701	5580749	BUTHIONINE-SULFOXIMINE	BUTHIONINE-SULFOXIMINE [ C8 H18 N2 O3 S, tgt=77.29, overall=77.29 ]			(205.09822, 544439.44)(206.10118, 63365.96)(207.10329, 4508.8394)(245.13644, 6810.5938)(223.13416, 709.15)(227.08012, 9197.476)(228.08337, 615.0625)	4.228
<i>trans</i>-5-O-caffeoyl-D-quinate	831573	452729	516385	555767	502286	499897	550855	550038	625811	1043212	720505	491917	690758	529216	939126	488294	496093	352958	572786	342746	CAFFEOYLQUINATE	CAFFEOYLQUINATE [ C16 H17 O9, tgt=70.70, overall=70.70 ]			(353.0833, 11532.358)(335.07425, 22707.225)(336.07745, 1998.9808)(354.1081, 4544.044)(355.1069, 763.35)(380.87332, 368843.0)(381.08, 148184.84)	1.61
5-<i>O</i>-caffeoylshikimate	551845	335962	401041	395225	367444	382609	251000	405188	467833	703725	329243	324217	490605	385577	562392	355931	272099	242476	314132	270178	CAFFEOYLSHIKIMATE	CAFFEOYLSHIKIMATE [ C16 H15 O8, tgt=70.70, overall=70.70 ]			(335.0747, 28855.004)(336.0779, 2629.9197)(317.77167, 9187.08)(318.06888, 2662.035)(319.0808, 1063.245)(354.10803, 5275.1157)(355.1069, 880.78503)(339.1067, 3771.46)	3.1983
L-canavanine	4194354	978875	1	364992	1496029	299023	1	341387	452037	4441190	192003	6461991	4452424	1	8922051	1347272	809563	2097841	1	1058209	CANAVANINE	CANAVANINE [ C5 H13 N4 O3, tgt=51.47, overall=51.47 ]			(177.09666, 1607.0609)(159.89398, 4419.368)(178.10773, 775.7625)(164.1073, 2331.23)(178.1229, 124377.78)(179.1261, 15011.54)(205.09848, 398516.56)(182.0818, 131637.4)(183.08495, 12137.27)(184.08554, 1008.766)	2.69922
canavaninosuccinate	741046	536763	692287	473738	675491	1661751	434299	255790	620980	2041911	1082779	1624247	2506271	1	3333325	1420524	3085716	541765	359715	1081115	CANAVANINOSUCCINATE	CANAVANINOSUCCINATE [ C9 H15 N4 O7, tgt=72.49, overall=72.49 ]			(291.0908, 26473.277)(292.1009, 7609.9053)(293.1046, 3523.21)(273.08325, 6306.002)(274.08487, 2499.7249)(279.0994, 979.68)(312.13055, 1626.405)(294.11768, 464.69)(316.5889, 1654.5499)(296.0671, 65389.703)(297.0696, 5242.355)(298.0658, 4694.7573)(299.0678, 708.62)	2.90675
capsaicin	1	140124	1	1	1	1	328823	1	1	91075	750982	115796	1	1	1	1	658329	407393	529682	1	CAPSAICIN	CAPSAICIN [ C18 H27 N O3, tgt= ]			(306.20645, 6915.1797)(288.19656, 604.73663)(293.2114, 14214.581)(333.2031, 538.17)(310.3698, 18244.09)(311.97687, 4282.564)	14.7621
capsanthin	16824836	1849100	7810265	13057443	5727850	23770168	18742428	6040452	1	12952614	14852401	15186501	5233267	29135116	20029848	1	21346022	13870146	15764284	3206201	CAPSANTHIN	CAPSANTHIN [ C40 H56 O3, tgt=82.01, overall=82.01 ]			(607.4565, 646.67)(585.4524, 154357.89)(586.45544, 57922.02)(587.4587, 11710.388)(588.46106, 1358.58)(593.40234, 489.37003)	21.658
capsorubin	1	1	1	1	1	1	124585	1	1	1	379267	1	1	1	1	1	216182	94140	155746	1	CAPSORUBIN	CAPSORUBIN [ C40H56O4, tgt= ]			(600.41266, 5599.9897)(623.3978, 2051.1802)	16.827
<i>N</i>-carbamoyl-L-aspartate	802075	1	1	254254	353391	72395	1	277557	288737	1	1	558011	459459	214187	768721	1	164966	1	1	1	CARBAMYUL-L-ASPARTATE	CARBAMYUL-L-ASPARTATE [ C5 H6 N2 O5, tgt=52.99, overall=52.99 ]			(177.03572, 538.9817)(158.02199, 2000.5999)(159.02367, 6970.8013)(160.02406, 3864.3638)(160.82942, 1303.278)(175.03719, 3583.6587)(158.3567, 3419.3467)(159.3609, 5818.437)(161.0316, 197.795)(192.14844, 8642.132)(193.05685, 1954.3625)(174.04582, 1200.3075)	1.575
1-(2-carboxyphenylamino)-1-deoxy-D-ribulose 5-phosphate	202669	152200	170954	227098	230245	236959	1	158495	292587	242931	172830	172544	216983	210985	217421	218886	1	1	1	208581	CARBOXYPHENYLAMINO-DEOXYRIBULOSE-P	CARBOXYPHENYLAMINO-DEOXYRIBULOSE-P [ C12 H13 N O9 P, tgt=8.75, overall=8.75 ]			(330.89154, 401.6457)(333.0332, 1637.335)(331.0421, 296.5)(347.56418, 3509.7432)(349.06244, 2075.145)(350.0643, 293.4)(369.0126, 1274.66)(351.01816, 10584.441)	1.926
catechol	1	1	1	1	1	1	1147272	1	131608	1	997882	1	1	145378	1	1	615992	621454	446707	1	CATECHOL	CATECHOL [ C6 H6 O2, tgt= ]			(111.04584, 2483.97)(112.0509, 418.46002)(110.06057, 26106.1)(111.0631, 1276.03)(118.42647, 8080.164)(119.0295, 10558.09)	2.47
CDP-choline	180088	1	133597	1	1	162580	1	1	1	167752	1	1	1	284551	245840	375222	1	1	1	1	CDP-CHOLINE	CDP-CHOLINE [ C14 H25 N4 O11 P2, tgt=28.30, overall=28.30 ]			(487.08548, 12684.851)(488.08868, 1676.2086)(493.1192, 475.99)(470.1031, 1849.5)	7.265
CDP-&alpha;-D-glucose	256616	139557	160512	271522	487752	183683	1	103339	143706	229983	1	150334	446836	89292	266354	468850	1	1	1	409108	CDP-D-GLUCOSE	CDP-D-GLUCOSE [ C15 H23 N3 O16 P2, tgt=19.27, overall=19.27 ]			(564.5615, 6414.5225)(549.06116, 8378.29)(550.0444, 12767.035)(565.0565, 4547.1675)(549.0642, 5464.2134)(550.0472, 8577.814)(551.0501, 1190.655)(563.0704, 12579.745)(564.073, 1206.2477)	20.025
CDP-ethanolamine	213382	1	1	1	1	1	1	1	1	1	1	1	199920	1	354328	1	1	1	1	1	CDP-ETHANOLAMINE	CDP-ETHANOLAMINE [ C11 H19 N4 O11 P2, tgt=19.99, overall=19.99 ]			(449.0568, 2046.325)(449.0592, 2632.74)(445.0863, 1775.0967)(451.0437, 187.29)	1.588
CDP group	1	165440	1	1	1	1	1	1	1	1	1	1	1	1	1	1	1	1	1	1	CDP-GROUP	CDP-GROUP [ C9 H13 N3 O11 P2, tgt= ]			(407.0299, 133008.47)(389.0179, 2876.49)(421.0435, 1033.46)	1.537
&beta;-D-cellobiose	1033668	1	920103	929797	789499	883480	12365524	900354	811469	1050290	11804705	1	1	4410196	4704845	7726699	1	11481850	12811718	4005349	CELLOBIOSE	CELLOBIOSE [ C12 H22 O11, tgt=75.22, overall=75.22 ]			(347.1383, 211.1)(325.11475, 133493.36)(326.11774, 15510.336)(327.12003, 4715.4663)(363.289, 1741.39)(364.1646, 145.67)(365.10043, 4581.351)(366.1159, 1141.14)	8.567
cyclic-GMP	486511	463453	579927	652010	111896	591256	1	432463	790212	719685	1	396719	598680	608376	491375	534769	1	1	133888	369015	CGMP	CGMP [ C10 H11 N5 O7 P, tgt=65.06, overall=65.06 ]			(349.0596, 1699.52)(330.1275, 503.3536)(331.0424, 193.48)(348.24197, 2767.6526)(348.07083, 6192.8545)(349.02505, 20367.615)(350.0288, 2928.43)	1.89
5'-deoxyadenosine	1	1	1	1	1	1	205595	1	1	1	1	1	1	1	1	1	1	1	153100	1	CH33ADO	CH33ADO [ C10H13N5O3, tgt= ]			(253.10516, 924.71497)(269.13635, 8398.545)	5.023
(<i>S</i>)-methylmalonate-semialdehyde	346546	298915	301003	308450	314579	277845	285404	280690	386283	349993	242910	283913	287823	334884	376198	277306	316396	269529	290638	267211	CH3-MALONATE-S-ALD	CH3-MALONATE-S-ALD [ C4 H5 O3, tgt=34.70, overall=34.70 ]			(107.04442, 15146.053)(128.4736, 535124.06)(128.19179, 234943.23)(129.02232, 196917.6)(110.00951, 344893.12)	1.405
3-chloro-L-alanine	398598	283790	262848	325381	231948	283537	126560	253043	367321	153674	100709	281057	552863	424109	231287	274898	106282	124264	123629	1	CHLORALAN-CPD	CHLORALAN-CPD [ C3 H6 Cl N O2, tgt=47.62, overall=47.62 ]			(123.01158, 2339.984)(108.79942, 7451.082)(129.0207, 14799.347)(130.0222, 160.0)(110.24464, 13969.5205)(111.00861, 9781.947)(143.61368, 3169.1257)(127.03657, 2435.89)(150.9979, 174.27)	2.379
chloroacetol-phosphate	1	634534	1	1	699652	1	2347073	1	1	1	3324605	1	1	1	1	1	1	2749157	1	871568	CHLOROACETOL-PHOSPHATE	CHLOROACETOL-PHOSPHATE [ C3 H4 Cl O5 P, tgt=20.87, overall=20.87 ]			(210.94067, 82169.086)(212.44165, 5153.3833)(212.93939, 18688.186)	1.683
chlorophyll <i>a</i>	2145940	1618783	1866218	1787437	1546326	1683393	670769	1886089	2015330	2152621	1547745	247739	2063451	2275704	2485675	383816	1547222	1263775	1856099	1586314	CHLOROPHYLL-A	CHLOROPHYLL-A [ C55 H71 Mg N4 O5, tgt=61.64, overall=61.64 ]			(873.50946, 33040.168)(874.5116, 8439.795)(875.5115, 287.69)(918.9682, 4366.839)(919.8636, 2830.0242)(920.67725, 737.83673)(900.7039, 12459.125)(901.70685, 5659.783)(902.62933, 60192.223)(903.4596, 31751.432)(904.46234, 8853.584)(904.5416, 10752.77)	8.759
chlorophyll <i>b</i>	869329	554987	605963	711855	483675	675600	113450	881706	613309	1	1	590466	1	970102	1096494	783122	1	1	191766	521344	CHLOROPHYLL-B	CHLOROPHYLL-B [ C55 H70 Mg N4 O6, tgt=48.69, overall=48.69 ]			(906.50757, 14247.2705)(907.5109, 5864.5684)(908.514, 1217.0433)(893.17523, 1344.0074)(893.0053, 2109.71)(893.5098, 2385.53)(894.5133, 597.81)(892.83984, 1060.5333)(894.0138, 1081.385)(894.5135, 379.07)(906.51086, 14500.314)(907.5141, 6402.2754)(908.5161, 622.5)(913.4732, 1599.28)	8.246
chlorophyllide <i>a</i>	827701	291804	362340	207768	184583	406039	1	471891	402323	630870	1	232893	533757	997290	730156	323249	1	1	1	211807	CHLOROPHYLLIDE-A	CHLOROPHYLLIDE-A [ C35 H32 Mg N4 O5, tgt=11.99, overall=11.99 ]			(613.2107, 14815.013)(614.21405, 3140.246)(616.22614, 1346.585)(641.2389, 3390.62)	7.149
cholesterol	1	1	1	1	1	1	1	1	1	1	100314	1	1	1	1	1	87771	1	1	1	CHOLESTEROL	CHOLESTEROL [ C27H46O, tgt= ]			(409.35022, 1856.4299)(394.34467, 910.005)	17.864
choline	144432304	117207664	125301168	120745152	55813368	128319088	142946032	126365544	161709504	131743776	127427256	129599776	121249432	148667680	163914208	148727568	148144816	127701568	134824848	129512104	CHOLINE	CHOLINE [ C5 H14 N O, tgt=91.39, overall=91.39 ]			(104.10787, 3924812.5)(105.11107, 220856.05)(106.112755, 11481.967)	1.604
chorismate	1	1	1	1	1	241623	1	1	182093	231182	1	220914	1	1	1	1	1	1	1	1	CHORISMATE	CHORISMATE [ C10H8O6, tgt= ]			(242.06421, 1001.595)(225.038, 7739.51)(226.0516, 736.1)(228.82205, 393.30753)	5.146
cinnamaldehyde	1100743	819691	338931	371191	314140	302078	1140605	336844	474326	997270	1111800	1011987	1109284	282042	1226079	360414	835288	797446	937908	281407	CINNAMALDEHYDE	CINNAMALDEHYDE [ C9 H8 O, tgt=79.27, overall=79.27 ]			(117.05821, 10337.986)(119.0667, 2434.24)(115.05452, 6577.0093)(132.08139, 28441.066)(133.08499, 2642.4255)(158.0597, 253.86)	4.226
cinnamyl alcohol	341569	1569354	428274	345033	1645597	693169	1473139	564713	477217	364036	744737	288373	374383	539021	562332	291455	636112	1002221	701531	1913095	CINNAMYL-ALC	CINNAMYL-ALC [ C9 H10 O, tgt=49.11, overall=49.11 ]			(136.30643, 37534.54)(137.07832, 3707.0872)(118.06604, 605.058)(138.09207, 182142.48)(139.09512, 13426.4)(120.08163, 18945.178)(121.0843, 3865.45)(162.07661, 4021.0332)(143.53171, 6261.8003)(144.0649, 1047.6)	1.967
(Z)-3-hexanal	63134580	71878152	65686588	53155360	58042456	70174008	62642728	60703760	65584740	61981724	69564528	46489380	62417720	95451672	66808796	67575648	59285256	55777792	4895603	46641720	CIS-3-HEXENAL	CIS-3-HEXENAL [ C6 H10 O, tgt=60.64, overall=60.64 ]			(100.07594, 224.78)(116.1078, 4861.37)(121.06559, 2180719.2)(122.06881, 176122.11)(123.07082, 10314.989)(103.05454, 96021.67)(104.05843, 7383.3594)	2.275
(3Z)-hex-3-en-1-ol	1	1284716	1	1	1094077	1297079	864026	1132832	1	1	762847	1	1	1	1	1	1	648651	1	792287	CIS-3-HEXENOL	CIS-3-HEXENOL [ C6 H12 O, tgt= ]			(104.106964, 6457.3687)(105.07016, 44419.453)(106.073395, 2603.141)	3.641
citrate	218037	368934	277277	343135	267508	336491	1	272721	385509	241855	120490	118923	266856	252356	136310	333839	1	1	97398	220771	CIT	CIT [ C6 H5 O7, tgt=74.23, overall=74.23 ]			(189.47693, 4324.6724)(190.01396, 5222.9727)(191.0133, 1567.39)(175.51073, 2074.7917)(212.0432, 2159.12)(193.03514, 24224.266)(194.03827, 568.13904)(214.003, 3136.97)	2.098
CMP	213168	1	1	1	140040	1	165821	109319	172183	286984	530356	1	176293	1	253625	1	211183	230098	330725	1	CMP	CMP [ C9 H12 N3 O8 P, tgt=21.13, overall=21.13 ]			(322.53842, 5566.16)(322.051, 773.14)(303.3857, 1586.7445)(307.02756, 3844.17)(326.0573, 1666.2151)(305.83746, 3634.5298)(307.21097, 3536.7969)(339.56512, 6330.904)(322.34592, 2661.6714)(323.0736, 7991.6)	1.654
CMP group	1	151243	1	1	131308	1	1	1	1	1	1	1	125795	1	1	1	1	1	1	1	CMP-GROUP	CMP-GROUP [ C9H13N3O8P, tgt= ]			(325.0574, 119854.21)(326.0597, 9454.097)	6.743
coenzyme A	1	1	1	1	1	1	1	1	1	1	485353	1	1	1	1	1	106321	137402	1	1	CO-A	CO-A [ C21 H32 N7 O16 P3 S, tgt= ]			(765.0982, 2843.3535)(766.0999, 836.13)(785.1347, 843.51)(763.12164, 6740.513)	26.122
a coenzyme-A group	1	1	1	1	1	1	1	1	1	1	485353	1	1	1	1	1	106321	137402	1	1	COA-GROUP	COA-GROUP [ C21 H32 N7 O16 P3 S, tgt= ]			(765.0982, 2843.3535)(766.0999, 836.13)(785.1347, 843.51)(763.12164, 6740.513)	26.122
columbamine	835350	511594	581353	402563	426908	628661	194641	594656	671647	1	266658	655985	789808	703233	1056037	1	201745	247655	209883	468104	COLUMBAMINE	COLUMBAMINE [ C20 H20 N O4, tgt=47.78, overall=47.78 ]			(340.14087, 1943.1799)(321.1317, 1657.425)(325.1391, 12510.44)(326.1425, 1389.36)(356.1764, 22639.482)(357.1786, 3136.1873)(342.95746, 1679.3793)(344.12445, 419.43)	5.6112
coniferaldehyde	1	253878	484734	224573	819023	184204	3900411	1	158264	716687	574200	460494	335327	1	452514	1121333	401824	4970886	1	798693	CONIFERYL-ALDEHYDE	CONIFERYL-ALDEHYDE [ C10H10O3, tgt= ]			(179.31226, 1044.8674)(160.05531, 2291.936)(182.08148, 7943.045)(183.08498, 779.7866)(165.0704, 657.105)(166.0703, 247.91)(197.4344, 677.295)(198.0972, 28.27)(179.75645, 1906.2935)(180.0885, 1313.085)(202.92064, 8472.177)(204.06082, 414.34854)(184.33043, 516.62714)	2.36615
coproporphyrin I	200936	249856	111441	127079	352019	124451	1	1	204097	1	1	118467	207766	93563	249723	1	1	1	1	306205	COPROPORPHYRIN_I	COPROPORPHYRIN_I [ C36 H34 N4 O8, tgt=24.96, overall=24.96 ]			(673.26556, 31527.535)(674.26855, 12218.993)(651.00586, 9416.657)(651.9801, 2245.9739)(660.4879, 1032.6425)(661.2426, 1867.0566)	20.2551
coproporphyrin III	200936	1	111441	127079	1	124451	1	1	204097	1	1	118467	207766	93563	249723	1	1	1	1	1	COPROPORPHYRIN_III	COPROPORPHYRIN_III [ C36 H34 N4 O8, tgt=24.96, overall=24.96 ]			(673.26556, 31527.535)(674.26855, 12218.993)(651.28235, 9456.344)(652.2852, 2748.1328)(660.4879, 1032.6425)(661.2426, 1867.0566)	22.96
coproporphyrinogen III	436924	135357	170595	222991	228731	168417	3097733	200340	408324	1	153461	313459	655777	245730	279042	158579	1074610	1720306	2383332	920640	COPROPORPHYRINOGEN_III	COPROPORPHYRINOGEN_III [ C36 H40 N4 O8, tgt=62.72, overall=62.72 ]			(658.618, 81793.72)(659.6208, 30621.312)(661.2901, 7457.7837)(639.283, 10208.54)(640.2859, 2669.94)(676.3081, 232.75)	20.9484
cortisol	462673	1	533276	125101	1	152622	261765	142711	153333	214115	112839	686263	237708	78133	284380	335984	302118	257995	270911	160359	CORTISOL	CORTISOL [ C21 H30 O5, tgt=38.71, overall=38.71 ]			(363.2154, 847.23)(347.2986, 1357.5818)(348.7092, 1670.0724)(349.21313, 2493.445)(346.70883, 2733.3035)(348.21524, 1335.495)(383.25836, 968.04755)(367.18045, 11053.02)(368.18518, 1674.969)	12.5755
cortisone	651705	245786	236567	263956	84690	218764	1	274081	142894	502620	1	479014	441705	88611	365087	111828	1	1	1	1	CORTISONE	CORTISONE [ C21 H28 O5, tgt=36.40, overall=36.40 ]			(385.18356, 1413.108)(346.20175, 4038.1013)(364.2122, 9890.812)(365.2141, 3050.6)	7.166
4-coumaraldehyde	23013660	16104190	9842013	10863660	7953195	11661429	14862324	13032341	11015300	28951332	14034925	31375174	26476778	10911485	59311356	1	22439708	13254761	14076533	12978919	COUMARALDEHYDE	COUMARALDEHYDE [ C9 H8 O2, tgt=79.24, overall=79.24 ]			(149.89856, 62139.383)(150.90059, 15383.602)(151.56041, 2521.0566)(149.06047, 8763.965)(131.04962, 6857.31)(166.0872, 708470.0)(167.09024, 65407.855)(148.0761, 1518.04)(157.0468, 483.1)	2.71
4-coumarate	1	1	1	1	1	1	20344014	1	1	1	17771124	1	1	1	1	13168024	14703764	7631078	15806401	1	COUMARATE	COUMARATE [ C9H7O3, tgt= ]			(163.03983, 189982.89)(164.04301, 16786.4)(165.0487, 444.18668)(145.0284, 79.09)(147.04317, 2691.16)(167.071, 331.85)(189.0398, 115.48)	3.599
coumarin	1168311	2840111	1271864	1445735	1535787	1203816	2803144	1126674	1034966	1564327	2875020	2954283	1376989	926313	3566643	1275287	2150517	2038104	2445134	1345834	COUMARIN	COUMARIN [ C9 H6 O2, tgt=81.67, overall=81.67 ]			(147.04356, 23927.24)(147.04445, 36948.574)(148.04819, 2768.007)(169.0837, 3598.9224)(146.06046, 54205.758)	5.018
4-coumaryl alcohol	2500835	2869901	2636267	2353984	1152621	2114684	3636306	1977074	2026652	3836632	4605961	2384700	2222071	1296869	1876775	2507161	2613806	4773420	2213532	1321791	COUMARYL-ALCOHOL	COUMARYL-ALCOHOL [ C9 H10 O2, tgt=82.67, overall=82.67 ]			(135.0683, 371.15)(151.07593, 71127.49)(152.07845, 6503.875)(136.0751, 642.896)(168.10147, 18082.896)(169.10516, 558.24335)(150.09198, 705.38995)(176.77036, 7263.6353)(177.07036, 8996.278)(157.04822, 3470.7559)	2.753
5,7-dihydroxy-2-methylchromone	1	1	1	1	1	122758	1	1	1	1	1	247739	1	1	1	1	1	1	1	1	CPD-0	CPD-0 [ C10H8O4, tgt= ]			(192.0376, 12215.25)(213.0787, 16761.75)(214.0862, 1957.09)(195.0791, 1256.14)	4.214
2-<i>cis</i>,6-<i>trans</i>,10-<i>trans</i>-geranylgeranyl diphosphate	1	207460	300803	257098	179192	1	156044	169941	318511	645583	154694	278313	453307	190060	557957	1	250283	110396	172957	158042	CPD0-1028	CPD0-1028 [ C20H33O7P2, tgt= ]			(448.6697, 582.7575)(429.17145, 8553.07)(433.51462, 1551.7294)(465.19376, 4446.0244)(466.1943, 630.8)(467.1836, 283.23)(449.7585, 28405.043)(451.05795, 6250.918)(475.1607, 828.31995)(453.7643, 23335.717)(456.15503, 8731.501)(457.1521, 1561.4117)	3.733
&alpha;-D-glucose 1-methylene-phosphonate	156801	354371	1	1	182178	101234	210222	231884	266398	206200	89595	85155	142431	1	141506	123342	1	149174	125331	117503	CPD0-1029	CPD0-1029 [ C7 H14 O9 P, tgt=39.33, overall=39.33 ]			(274.84454, 3785.0718)(274.0463, 1450.97)(256.0309, 923.18)(275.052, 947.51)(257.7031, 5237.28)(294.32642, 1164.475)(295.0758, 1572.9125)(275.93832, 9677.005)(277.46872, 2703.145)	1.662
psicofuranine	737517	116811	397970	398487	629637	374146	688993	407490	147727	149991	1	278294	215504	450478	151953	414167	258353	1	1	362829	CPD0-1033	CPD0-1033 [ C11 H15 N5 O5, tgt=24.13, overall=24.13 ]			(297.29083, 13809.0625)(298.11435, 11061.551)(315.1419, 8249.57)(300.14502, 636.54004)(324.6853, 170859.11)(325.1144, 1380.07)(305.76425, 8473.273)	7.18088
acivicin	737593	876332	907629	943078	962146	887013	867743	753802	1191388	905288	426454	648834	756243	928163	806533	250072	331189	383911	369194	559157	CPD0-1036	CPD0-1036 [ C5 H7 Cl N2 O3, tgt=47.44, overall=47.44 ]			(178.01047, 2712.98)(160.00322, 4195.4995)(184.38773, 1709.0742)(165.01443, 3758.034)(168.0188, 887.87)(201.24976, 11935.666)(201.04764, 3373.185)(180.03816, 539.9189)(203.00487, 13346.289)(205.00359, 1515.7161)(208.00667, 425.92667)(186.99483, 9478.236)(188.10524, 2911.691)	1.661
2-thiouridine 5'-triphosphate	360030	239808	274194	361575	467992	286228	1	183455	260144	334645	1	225094	460467	228819	385297	475370	1	1	1	441370	CPD0-1037	CPD0-1037 [ C9 H11 N2 O14 P3 S, tgt=36.61, overall=36.61 ]			(518.8907, 13861.803)(519.89386, 1498.8444)(505.89267, 65287.387)(506.895, 4124.5786)	20.642
thiourea dioxide	342999	167793	577387	458387	1	1	165718	311407	1	1	217377	800328	416410	530541	226434	257947	87517	1	1	1271745	CPD0-1038	CPD0-1038 [ C H4 N2 O2 S, tgt=45.07, overall=45.07 ]			(110.009445, 189205.8)(112.00699, 28206.338)(127.91647, 147363.45)(112.979164, 23147.514)(113.985886, 723.3162)	1.9804
7-methylinosine	13769957	14525341	12332735	14098937	11152660	12627013	11378354	13608226	13399495	12064227	8554586	10483282	15749080	13968772	13872643	14514600	8889117	1	11949949	12257496	CPD0-1040	CPD0-1040 [ C11 H15 N4 O5, tgt=63.62, overall=63.62 ]			(301.14212, 245740.73)(302.14514, 37994.6)(303.14752, 3061.1665)	17.606
8-hydroxy-dATP	1	1	167969	1	1	1	1	1	1	1	1	1	1	1	1	1	1	1	1	1	CPD0-1093	CPD0-1093 [ C10 H14 N5 O13 P3, tgt= ]			(505.007, 7294.54)(506.0093, 234.55)	1.885
azetidine-2-carboxylate	843547	573949	402050	90783	182833	372967	923656	636463	409033	692253	861158	792155	761154	323029	1334431	429796	1017607	154845	204859	188296	CPD0-1104	CPD0-1104 [ C4 H7 N O2, tgt=44.22, overall=44.22 ]			(102.8031, 5630.5425)(102.05535, 4267.237)(124.139694, 12516.981)(125.03875, 695.5825)	1.857
&beta;-D-ribofuranose	1048929	6785845	847171	906393	987343	1010305	543032	879347	1043209	1264960	750668	794695	1099030	7412115	1326810	970556	623471	531872	412631	922006	CPD0-1108	CPD0-1108 [ C5 H10 O5, tgt=66.31, overall=66.31 ]			(151.85777, 54483.367)(152.80956, 3677.0923)(152.0581, 1224.31)(133.89182, 7813.951)(153.5686, 2538.3826)(133.55286, 2088.9988)(168.08765, 1724.17)(150.22757, 17697.045)(151.15779, 459.68387)(174.04584, 1177.4974)(157.84055, 3095.2559)	2.028
&beta;-L-rhamnopyranose	2614902	1839656	2546118	2435025	793035	2028990	2399819	2101865	3271770	2722404	2139143	2778887	2319518	2605909	3302872	2309069	2624399	2151371	2453117	699628	CPD0-1112	CPD0-1112 [ C6 H12 O5, tgt=52.91, overall=52.91 ]			(167.07631, 420.83334)(147.20352, 21600.621)(147.06114, 3402.0833)(169.99559, 38987.953)(171.05327, 4071.912)(172.05972, 5956.753)	1.82675
nicotinamide hypoxanthine dinucleotide	1	1	1	1	1	1	1	1	1	1	387243	1	1	1	1	1	239964	86755	111647	1	CPD0-1117	CPD0-1117 [ C21 H26 N6 O15 P2, tgt= ]			(665.0832, 12710.021)(666.0864, 5175.71)(647.0835, 1224.4049)	17.883
ubiquinone-1	989185	2293321	1229554	626912	3228992	472800	389844	832564	314382	1376450	375071	963419	1865581	722395	725673	715864	1084771	780709	720884	1242207	CPD0-1118	CPD0-1118 [ C14 H18 O4, tgt=46.18, overall=46.18 ]			(233.11716, 3718.6125)(271.66382, 5083.035)(269.1556, 743.95337)(259.1132, 2447.7275)(250.14433, 10958.638)(251.14265, 1087.5266)	5.4774
maltoheptaose	141548	1	1	1	1	1	1	1	1	134919	1	100078	115293	1	155851	1	1	1	1	1	CPD0-1133	CPD0-1133 [ C42 H72 O36, tgt=16.44, overall=16.44 ]			(1157.4088, 4837.18)(1158.4122, 1964.264)	8.216
tubercidine 5'-monophosphate	93508	644435	138971	751568	111896	73002	157001	106482	963721	972215	360246	459286	144789	112937	152906	92058	317085	155572	449667	434073	CPD0-1138	CPD0-1138 [ C11 H13 N4 O7 P, tgt=45.23, overall=45.23 ]			(347.9199, 5460.997)(348.07037, 6398.9004)(330.05832, 1378.6199)(348.06357, 7583.0654)(348.07028, 9995.47)(330.05994, 1659.866)(364.31805, 5557.8115)(366.0866, 877.29)(349.0872, 2197.842)(367.0394, 234.12)(349.42703, 11016.166)(351.026, 1549.69)	1.89
vidarabine phosphate	1	1	101872	120594	1	114475	1	1	168923	139172	1	1	126888	113361	1	98252	1	1	1	1	CPD0-1139	CPD0-1139 [ C10 H12 N5 O7 P, tgt= ]			(346.0556, 545.72)(330.3713, 418.75668)(349.06235, 3161.2668)(351.0695, 9750.99)(332.5585, 1674.1533)(333.0592, 1898.26)(348.07104, 4919.2236)(350.0282, 6874.753)	1.894
3,3-dimethyl-2-oxobutyric acid 5-(6-aminopurin-9-yl)-3,4-dihydroxytetrahydrofuran-2-ylmethyl ester	1	1	1	653462	1	1	1	1	796860	1	1	639735	1	1219563	1	615226	1	1	1	1	CPD0-1141	CPD0-1141 [ C16 H21 N5 O6, tgt=33.58, overall=33.58 ]			(379.13766, 42974.074)(380.14078, 6400.9385)(383.1744, 1186.905)(387.14462, 440.84)	7.46571
azaguanine	660009	253246	1	1	400325	173033	159754	1	227667	1	822032	202779	1	1	1	206274	1	1	1	403433	CPD0-1143	CPD0-1143 [ C4 H4 N6 O, tgt=64.25, overall=64.25 ]			(156.79778, 4288.7476)(139.03375, 4562.0015)(158.0602, 1353.4)(136.64581, 6265.886)(170.0812, 16689.594)(171.0849, 1347.52)(154.36987, 13803.589)(153.0716, 366.55)(175.03694, 2583.3015)(158.4, 2689.4448)(159.02396, 8967.056)(160.0229, 3565.668)(161.0305, 382.01)	2.35832
<i>N</i>-pentylpantothenamide	2137333	1	1	1381790	114004	2213293	789629	1785593	1604111	1	1622901	1807610	2993466	1	2077757	1968302	1076532	932686	1104016	1	CPD0-1152	CPD0-1152 [ C14 H28 N2 O4, tgt=23.45, overall=23.45 ]			(292.9619, 5558.5015)(293.2127, 5128.71)(271.65887, 29718.54)(272.42535, 3716.3428)(275.2017, 2506.484)(292.2247, 25090.55)(306.24, 22213.59)(307.2424, 2885.155)(294.1918, 1453.155)	9.6006
<i>N</i>-heptylpantothenamide	1	1	1	1	1	1	526809	1	1	1	717262	1	1	1	1	1	2886744	1868816	1360441	1	CPD0-1153	CPD0-1153 [ C16H32N2O4, tgt= ]			(320.2551, 1000.17)(298.2162, 8915.24)(299.2175, 751.7)(318.91263, 128664.664)(320.25388, 66615.79)(321.2608, 62388.547)(321.2603, 29389.16)(299.8996, 220140.75)(300.8999, 47580.293)(301.90308, 4876.5396)(336.07285, 6678.1357)(335.2698, 3215.015)(343.2276, 1683.16)(322.22296, 1144.825)	17.2972
4-deoxypyridoxine 5'-phosphate	129859	1	646858	570906	1	669867	222694	671648	714803	316318	268021	1	380357	934882	195706	397588	186183	139039	226225	1	CPD0-1221	CPD0-1221 [ C8 H10 N O5 P, tgt=40.97, overall=40.97 ]			(231.57466, 18325.467)(232.03009, 694.39)(214.65337, 49874.184)(215.68405, 4409.1147)(217.02551, 1635.1)(233.04166, 3694.0361)(214.78398, 7132.282)(249.06183, 764.94336)(232.55925, 2875.61)(255.69629, 2661.62)(239.0229, 222.39)	2.49259
L-2-amino-4-oxo-5-chloropentanoate	534323	360991	293231	312033	303531	570236	977618	440961	327006	568813	928759	632602	822571	159195	1072504	318092	701676	851159	1112926	275689	CPD0-1224	CPD0-1224 [ C5 H8 Cl N O3, tgt=49.72, overall=49.72 ]			(167.13998, 7831.2026)(170.16783, 24676.629)(172.0307, 8674.25)(153.68092, 229.69331)(169.52304, 92613.984)(171.6957, 55497.465)(172.0306, 7922.16)(151.14203, 3505.102)(152.0194, 5424.4194)(154.01962, 197.87999)(184.3531, 10029.694)(184.04872, 1901.7952)(170.10846, 17052.03)(190.76073, 1525.9877)(192.67632, 1444.5468)(193.0086, 1974.46)(170.70305, 1245.0558)	1.584
piericidin A	251631	1	431774	402760	1	122088	1	1	179238	281548	203372	185990	1	140931	497150	449068	230504	1	212076	1	CPD0-1233	CPD0-1233 [ C25 H37 N O4, tgt=44.21, overall=44.21 ]			(415.27313, 10258.918)(399.4126, 1059.0754)	22.256
monofluoromethylornithine	602493	446155	283795	331984	372093	365948	130347	429677	453759	636634	158041	385649	460331	973970	668424	504365	149962	147575	362945	405611	CPD0-1240	CPD0-1240 [ C6 H14 F N2 O2, tgt=84.39, overall=84.39 ]			(148.0973, 515.5867)(188.09244, 12770.563)(170.08183, 14588.403)(171.08423, 1058.4584)	1.908
thiolactomycin	2607189	1204399	3158475	2463558	1156675	1637423	682418	2735108	3025489	3238352	220373	2000968	2685675	2922381	2404371	3048140	170411	151139	738179	2082993	CPD0-1242	CPD0-1242 [ C11 H14 O2 S, tgt=49.62, overall=49.62 ]			(212.49721, 434.78)(213.9606, 402.02335)(214.0714, 428.14)(192.05605, 5071.082)(193.05891, 1305.5066)(194.00882, 2782.4268)(229.55623, 268.17334)(234.11406, 1413.5048)(215.75204, 5144.6226)(216.04312, 260.51498)(217.03859, 295.36)	2.044
myxothiazol	6244627	1	3766103	2206494	5867798	4740067	177814	3272922	3583202	1	2095133	3183154	6948141	8078645	7140171	4279963	904023	1	150057	4998587	CPD0-1244	CPD0-1244 [ C25 H33 N3 O3 S2, tgt=59.52, overall=59.52 ]			(469.1843, 10628.41)(470.18735, 1017.655)(473.2034, 669.94995)(505.89404, 4206.455)(508.243, 2095.89)(487.2158, 72033.68)(488.21884, 14645.286)(489.22165, 2843.4258)(511.17923, 5254.795)(512.1829, 1550.5668)(495.91122, 4534.765)(497.3797, 16053.972)(497.6819, 959.67)(498.1727, 2558.47)	6.1937
D,L- &gamma;-hydroxyphosphinothricin	5043693	1625943	1050837	1078360	1891216	1071681	4557082	1425411	1505066	6325551	5959193	3902500	4428175	681104	5920886	1252042	2808695	4981724	4721220	1721089	CPD0-1245	CPD0-1245 [ C5 H11 N O5 P, tgt=76.95, overall=76.95 ]			(200.04454, 6687.4517)(201.04471, 6408.08)(201.0588, 3278.11)(184.04994, 2410.6433)(219.02754, 206388.6)(220.02937, 14854.805)(221.02678, 16051.844)(222.0319, 1922.73)(204.35521, 5863.9077)(205.42416, 4009.582)(206.02765, 5574.5864)	1.761
D,L-cyclohexanephosphinothricin	1	1	1	1	1	1	1	1	1	194020	1	1	1	1	1	1	1	1	1	1	CPD0-1246	CPD0-1246 [ C8 H15 N O4 P, tgt=31.98, overall=31.98 ]			(221.0711, 287.67)(221.0832, 6583.48)	3.958
D,L-&alpha;-methylphosphinothricin	1	1	651596	574615	1	1	808566	1	503538	1	1040102	1	1	555436	1	1417524	686215	549357	965642	1	CPD0-1248	CPD0-1248 [ C6H13NO4P, tgt= ]			(195.06584, 9321.874)(177.05649, 35183.707)(178.05948, 2567.2703)(217.10085, 2403.8767)(201.04459, 6240.1533)	5.50645
&gamma;-methylphosphinothricin	1	1	1	574615	1	1	808566	1	1	1	1040102	1	1	1	1	1	686215	549357	965642	1	CPD0-1249	CPD0-1249 [ C6H13NO4P, tgt= ]			(195.06584, 9321.874)(177.05652, 32531.986)(178.05922, 2299.665)(217.09961, 2834.2878)(201.04424, 7125.529)	5.30695
dihydrohomopteroate	265193	187408	292891	218301	175300	254730	235438	218146	374879	163145	259656	199488	312542	260957	391735	162831	268837	191101	1	191555	CPD0-1251	CPD0-1251 [ C15 H15 N6 O3, tgt=35.39, overall=35.39 ]			(328.83536, 2614.5063)(331.1344, 242.33)(329.1216, 2536.926)(331.1348, 693.52)(313.63196, 399.21997)(346.59927, 1053.5923)(327.14148, 7434.9434)(351.2737, 961.6258)	4.57563
dihydro-10-thiopteroate	383803	1	1	1	197064	1	437777	198729	1	229186	424875	268940	474855	1	465976	124439	172562	444243	192479	269073	CPD0-1252	CPD0-1252 [ C14 H12 N5 O3 S, tgt=69.15, overall=69.15 ]			(318.0655, 498.27002)(330.059, 1557.399)(351.60413, 3367.1653)(351.10394, 2175.07)(333.92188, 12579.984)(335.80417, 6028.891)(336.83456, 14776.759)(337.08734, 19381.484)(332.0888, 1222.035)	1.67
dihydroisopteroate	2829212	1924858	2470740	2443059	27917696	2365205	2365448	2953868	35231000	2599629	1942416	2203020	2381957	38405036	3418022	2403884	750575	3750129	32184562	30239172	CPD0-1253	CPD0-1253 [ C14 H13 N6 O3, tgt=44.61, overall=44.61 ]			(319.1299, 1947.72)(296.10727, 33006.957)(297.10867, 5959.608)(339.1093, 2386.4077)(318.0774, 1228.4366)	7.801
10-methyl-5,6,7,8-tetrahydropteroylglutamate	2013762	1325868	1262142	1761571	737682	1747422	1488770	1382081	2383066	1859711	1936714	1378627	1490722	2170278	2936054	1597866	1672798	832925	1946844	699196	CPD0-1255	CPD0-1255 [ C20 H23 N7 O6, tgt=84.85, overall=84.85 ]			(457.5465, 5532.762)(458.84317, 1075.4166)(461.1927, 264.49)(439.15796, 41658.93)(440.15845, 9715.298)(441.16382, 1679.9242)(459.18365, 10516.126)(460.52393, 1997.4508)(461.19623, 438.538)(479.2069, 630.35)(461.1994, 3847.5928)(480.17178, 772.1567)	4.579
4,5-dihydroxyisophthalate	178951	151799	601374	215455	1	240926	200257	218287	1	361954	182769	209547	166798	298316	1	493079	262530	151565	245173	171602	CPD0-1263	CPD0-1263 [ C8 H4 O6, tgt=38.72, overall=38.72 ]			(197.00636, 2075.566)(199.00224, 2985.9265)(178.99168, 11090.03)(179.9905, 2535.32)(197.00584, 1265.14)(178.99432, 11705.313)(179.99171, 1982.282)(180.99278, 865.425)(215.5435, 3993.065)(216.0425, 523.05)(198.0273, 3963.655)(200.97392, 12839.164)(201.9753, 2951.1858)	1.425
suberate	227188	438076	183959	182229	234795	874633	190305	187163	236571	270208	951634	174730	288622	232634	350966	1413606	665284	138733	938954	11282042	CPD0-1264	CPD0-1264 [ C8 H12 O4, tgt=49.95, overall=49.95 ]			(173.07947, 733.006)(174.07701, 1632.6721)(173.078, 11940.72)(156.67825, 1332.6339)(158.08167, 766.3934)(192.11264, 8238.061)(195.1223, 347.79)(176.1072, 12051.34)(197.38127, 3668.1619)(177.05579, 30554.055)(178.05914, 3177.545)	5.211
azelate	407718	446729	441228	201486	438595	264200	1	330245	398721	336249	1	565917	358811	290176	340135	255471	1	1	1	517638	CPD0-1265	CPD0-1265 [ C9 H14 O4, tgt=37.39, overall=37.39 ]			(169.08417, 12522.923)(205.12259, 1365.522)(209.08156, 1959.2483)(191.07108, 2114.3667)	3.941
isophthalate	201324	241934	247532	173557	160578	222026	813198	204526	215207	281191	724969	167142	141295	151335	205389	148717	807521	754510	854708	144256	CPD0-1267	CPD0-1267 [ C8 H4 O4, tgt=46.48, overall=46.48 ]			(167.649, 10039.793)(168.0179, 557.03)(151.01575, 7506.33)(151.54842, 4784.664)(152.01636, 2187.685)(184.59262, 5492.477)(184.04735, 1922.7075)(165.03334, 3139.8235)(188.80426, 8043.9614)(190.68028, 2499.7766)(192.01175, 1259.8049)(171.24835, 1602.939)	2.188
4-bromoisophthalate	214079	352615	278499	293156	317212	257115	353878	268152	282437	292155	296649	326873	254275	275606	230981	288390	285072	354510	309855	280589	CPD0-1269	CPD0-1269 [ C8 H9 Br O4, tgt=58.64, overall=58.64 ]			(247.96173, 1435.109)(248.9616, 411.39334)(236.9741, 406.82)(252.97453, 6821.0283)(253.67473, 3693.5242)(256.9836, 19399.86)(236.4765, 1043.4434)(236.97652, 956.53796)(271.71646, 1819.4634)(272.0167, 475.62)(273.0079, 1571.48)(250.9858, 371.71)(271.9562, 3122.1863)(273.11472, 10125.306)(274.62778, 2254.5413)(275.58752, 1517.9775)(276.1297, 1929.62)(276.9637, 406.67)(254.94835, 2206.081)(255.942, …	1.404
chelidamate	1	1	1	1	1	162746	1	99439	1	1	1	1	1	1	1	1	1	1	1	104023	CPD0-1271	CPD0-1271 [ C7 H3 N O5, tgt= ]			(201.0442, 2967.4568)(183.03143, 6708.143)	4.464
3,5-dihydroxybenzoate	346562	868465	499689	441150	299708	442013	336432	1	394170	458883	51783	285028	413234	450541	457094	1	167639	184375	120889	584895	CPD0-1274	CPD0-1274 [ C7 H5 O4, tgt=39.52, overall=39.52 ]			(154.74669, 4561.5825)(155.01958, 2686.41)(175.06006, 3459.815)(153.03984, 2639.3367)(176.01157, 80450.43)(177.01987, 8738.383)(178.0106, 4740.4136)(160.0029, 829.65)	1.598
cyclogutamate	3094298	236060	493703	106810	280940	480947	2679434	98861	638039	3308095	2216908	2870994	2629038	630819	3356164	539464	3046393	2387189	2839366	350219	CPD0-1276	CPD0-1276 [ C8 H12 N O4, tgt=49.98, overall=49.98 ]			(186.37697, 14924.685)(188.07956, 9811.97)(189.08025, 6293.09)(168.06406, 7388.746)(187.55203, 39759.383)(172.70462, 1487.9313)(190.10779, 3378.459)(211.3418, 2428.1174)(212.5685, 1339.575)(212.0681, 392.01)(191.58897, 3676.1292)(193.05602, 1201.498)	1.78695
3-methyl-2-butanone	136819632	110818448	118730688	114380480	47823672	121534288	135381696	119761192	153252768	124826376	120580560	122951840	114853776	140927360	155214944	141082512	140453136	120900072	127914016	122529496	CPD0-1307	CPD0-1307 [ C5 H10 O, tgt=91.39, overall=91.39 ]			(104.10787, 3919773.5)(105.11107, 220559.92)(106.112755, 11461.286)	1.604
glyphosate	212626	87363	167078	201949	170475	99073	1	159191	118689	89286	1	193595	137346	93273	223265	212553	93436	1	1	139342	CPD0-1308	CPD0-1308 [ C3 H6 N O5 P, tgt=53.76, overall=53.76 ]			(168.00053, 4480.0576)(169.00146, 377.58502)(154.0026, 304.45)(168.83778, 4193.558)(169.00179, 467.3225)(169.9954, 433.49)(150.88754, 1564.8954)(186.42226, 3213.8794)(189.0434, 412.29)(170.52788, 2866.7844)(172.02983, 717.19)(172.97823, 6071.09)	1.427
5-fluoropyrimidin-2-one-ribonucleoside	208223	207938	1	197638	257031	1	227296	209099	241244	257308	295799	280020	260523	95446	352686	1	1	245708	259344	1	CPD0-1311	CPD0-1311 [ C9 H11 F N2 O5, tgt=57.26, overall=57.26 ]			(233.06161, 2381.2341)(252.0866, 337.44)(268.1047, 14316.469)(269.10757, 2642.6785)(251.04341, 8896.087)	1.493
pyrimidin-2-one-ribonucleoside	2010750	3340823	3054847	2631000	1982743	1535843	329462	2355611	3154715	2381249	490460	1599639	2228109	2491110	1705017	2818859	1	264969	1	1894553	CPD0-1312	CPD0-1312 [ C9 H12 N2 O5, tgt=91.83, overall=91.83 ]			(210.06175, 60647.957)(211.06459, 6826.4014)(212.06578, 461.88376)(234.09764, 810.22)(233.11255, 336.29498)(256.0823, 4716.9565)(236.48961, 1202.0321)	2.045
mersalyl acid	342918	1006657	1	1	1	1179791	476943	103030	1	349523	782490	206174	420550	1649560	450259	143695	1	433536	813303	463132	CPD0-1313	CPD0-1313 [ C13 H15 Hg N O5, tgt=47.56, overall=47.56 ]			(463.0691, 3383.98)(471.085, 381.03)(449.05655, 3041.2)(463.06808, 4655.252)(464.0702, 241.72)(449.0578, 2301.2378)(457.0905, 443.07)(493.11856, 1690.5635)(465.10065, 36674.04)(489.05975, 2056.6501)(468.64444, 623.16797)(467.04126, 833.2475)	4.39707
uridine-5'-diphosphate bromoacetol	356213	247307	263728	361545	480066	288784	1	172352	252415	326495	1	225948	471907	245198	394283	513859	1	1	1	455502	CPD0-1314	CPD0-1314 [ C12 H15 Br N2 O13 P2, tgt=56.65, overall=56.65 ]			(518.8918, 13549.466)(519.89496, 1698.86)(562.9168, 11780.861)(563.9199, 1512.5721)(540.90356, 13589.359)(541.90686, 1636.5093)	20.593
uridine-5'-diphosphate chloroacetol	1	1	1	1	144662	1	1	1	1	1	1	1	1	1	1	180970	1	1	1	1	CPD0-1315	CPD0-1315 [ C12 H15 Cl N2 O13 P2, tgt= ]			(515.02014, 604.91003)(492.50507, 6097.815)	20.223
P1-uridyl-P2-methyl diphosphate	188749	1	346636	365560	256408	213204	1	298698	356167	252666	1	1	213707	270552	138725	305091	1	1	1	240572	CPD0-1325	CPD0-1325 [ C10 H14 N2 O12 P2, tgt=0.27, overall=0.27 ]			(421.04672, 1800.2915)(438.98083, 11689.357)(439.98322, 456.75098)	2.061
p-(bromoacetamido)phenyl uridyl pyrophosphate	5746839	4097163	4380448	5702316	8302167	4788448	1	3285549	4180556	5155141	1	3815025	7495429	4674710	5955819	7919605	1	1	1	9691658	CPD0-1326	CPD0-1326 [ C17 H18 Br N3 O13 P2, tgt=45.74, overall=45.74 ]			(615.9557, 97454.09)(616.9576, 9060.68)(595.9215, 46751.7)(596.92426, 10720.483)(615.95905, 77639.66)(616.96136, 7004.9097)(615.9598, 48036.68)(616.9623, 3711.71)(639.948, 37910.07)(640.95074, 9269.19)(617.9344, 43612.336)(618.9371, 10226.626)(620.9145, 3073.7737)	20.458
5-fluorouracil	660715	654292	681079	692309	719210	637398	608034	638191	863376	716659	522475	644081	578831	779510	723209	615101	607377	581643	577029	636869	CPD0-1327	CPD0-1327 [ C4 H3 F N2 O2, tgt=57.85, overall=57.85 ]			(112.007034, 43984.105)(113.00902, 1557.5779)(114.01671, 19956.535)(115.01725, 3379.0833)(131.0444, 12183.693)(132.04457, 1727.3181)(134.04546, 552.99335)(154.2637, 694.5925)(139.44998, 806.0151)(140.0047, 1044.928)	1.406
5-mercaptodeoxyuridine	1167584	253050	199144	1062285	187094	193992	950891	247379	250232	295704	826373	292166	1374649	187570	1146937	168414	1062909	890760	926124	1	CPD0-1342	CPD0-1342 [ C9 H11 N2 O5 S, tgt=71.97, overall=71.97 ]			(259.04346, 22342.475)(260.04645, 1526.7051)(245.0276, 1945.53)(261.04782, 21556.738)(262.0485, 2717.8633)(263.0508, 4605.6157)(246.8429, 11564.153)(247.0437, 20239.49)(277.83786, 4788.3604)(279.57104, 2711.1648)(261.85904, 21883.857)(262.0623, 1343.67)(263.05798, 3189.5151)(282.03168, 73415.5)(283.03284, 24566.78)(264.38794, 19264.89)(266.0176, 8923.948)(267.01468, 8466.624)(268.0162, 1202.2357)	1.611
5-bromo-dCTP	94355	222423	237002	111354	225984	85698	1	160922	221553	93412	1	206630	201931	106479	112988	243607	1	1	1	421690	CPD0-1343	CPD0-1343 [ C9 H11 Br N3 O13 P3, tgt=38.48, overall=38.48 ]			(540.8592, 1666.0901)(545.8674, 335.18)(529.88184, 48478.293)(530.8846, 9115.203)(561.102, 22200.025)(562.1052, 3891.231)(545.70197, 8635.881)(541.9068, 1301.5933)(543.8794, 649.29)(567.8768, 354.72)	16.8005
tetrahydrothiamine diphosphate	650783	1240322	1068320	1190419	661258	803202	1	848770	1179619	1012928	1	471272	1080423	1305053	608478	815492	1	1	1	559350	CPD0-1354	CPD0-1354 [ C12 H19 N4 O7 P2 S, tgt=60.99, overall=60.99 ]			(407.03253, 63527.902)(408.03387, 14524.295)	2.057
3-pyridinecarboxaldehyde adenine dinucleotide	127463	1	1	1	1	1	159645	1	1	109888	751813	1	1	129620	120306	1	565332	237685	322512	1	CPD0-1364	CPD0-1364 [ C21 H26 N6 O14 P2, tgt=17.57, overall=17.57 ]			(669.1455, 448.8475)(649.1153, 6858.9824)(677.0838, 3144.85)(653.083, 28171.928)(654.08606, 11329.633)(655.0849, 1416.22)	15.138
carboxin	1	1	1	1	217904	1	1	1	479015	875908	1	227011	736951	1	1	1	266530	1	177405	1	CPD0-1366	CPD0-1366 [ C12 H13 N O2 S, tgt= ]			(235.86247, 24157.605)(237.066, 285.52)(219.0504, 501.44998)(219.07071, 1892.925)(236.59055, 659.945)(237.088, 2259.58)(261.05884, 7664.495)(243.55206, 1539.46)(245.0526, 586.75)	3.837
menaquinone-1	1	1	1	1	1	1	223039	1	1	1	1	1	1	1	672946	1	537640	1	1	1	CPD0-1367	CPD0-1367 [ C16 H16 O2, tgt= ]			(223.1076, 11158.36)(245.09224, 22491.258)(246.09634, 3780.515)	5.18112
&alpha;-(2,6-anhydro-3-deoxy-D-arabino-heptulopyranosid)onate 7-phosphate	193204	1	1	1	1	1	1	1	1	206672	1	1	357450	1	216683	1	1	1	1	1	CPD0-1370	CPD0-1370 [ C7 H10 O9 P, tgt=0.50, overall=0.50 ]			(275.01797, 38435.695)(289.0419, 573.41)(273.04623, 9141.143)	1.889
&beta;-(2,6-anhydro-3-deoxy-D-arabino-heptulopyranosid)onate 7-phosphate	193204	1	1	1	1	1	1	1	1	206672	1	1	357450	1	216683	1	1	1	1	1	CPD0-1373	CPD0-1373 [ C7 H10 O9 P, tgt=0.50, overall=0.50 ]			(275.01797, 38435.695)(289.0419, 573.41)(273.04623, 9141.143)	1.889
S-adenosyl-1,8-diamino-3-thiooctane	1	1	1	1	543599	1	188621	1	1	1	214543	1	1	1	1	1	200372	245058	194610	690685	CPD0-1375	CPD0-1375 [ C18 H33 N7 O3 S, tgt= ]			(429.83603, 21047.543)(430.83984, 3229.9282)(428.2365, 12420.596)(429.2397, 709.48)(411.2479, 555.87)(445.2767, 353.03)(453.2136, 4973.25)	10.1873
3-(sulfanylcarbamoyl)-L-alanine	2155833	1315522	742515	355974	1	2048563	1	140172	1	1069069	1	1	2120272	1	1	1089378	3092615	2508393	2405907	1265627	CPD0-1386	CPD0-1386 [ C4 H8 N2 O3 S, tgt=44.83, overall=44.83 ]			(149.76636, 876.9501)(166.36545, 358.53888)(147.02377, 23165.957)(186.1757, 7131.9844)(184.06145, 4115.05)(187.06085, 612.035)(167.74294, 22125.738)(168.80237, 4995.04)(190.61482, 306.76996)(191.0153, 385.58)(192.0122, 537.05)(171.0026, 353.0)	1.09105
cisplatin	1	135629	83876	96102	91797	1	1	1	78531	97613	1	1	1	90663	100446	1	78905	1	115876	1	CPD0-1392	CPD0-1392 [ Cl2 H6 N2 Pt, tgt= ]			(296.37653, 3103.2441)(298.23163, 4495.257)(300.94772, 1992.8182)(304.95566, 1254.1421)(304.95392, 966.7025)(307.95294, 1466.3833)(308.9621, 504.75)(298.96524, 3219.9932)(320.38458, 2047.35)(321.3862, 1533.46)(322.9803, 1034.52)(326.9901, 2593.34)	1.411
2'-chloro-2'-deoxyuridine-5'-diphosphate	188749	468617	346636	365560	256408	213204	1	298698	356167	252666	1	106763	213707	270552	138725	305091	1	1	1	240572	CPD0-1394	CPD0-1394 [ C9 H10 Cl N2 O11 P2, tgt=51.66, overall=51.66 ]			(437.9739, 6634.3096)(438.98074, 11804.485)(439.98294, 532.55)	2.061
5'-(dimethylsulfonio)-5'-deoxyadenosine	24138242	21405456	1806293	2333526	21124808	20481426	357616	2650961	2326596	2506565	34856784	1996841	2483807	2940310	2853176	1960042	612888	31170324	702803	21316448	CPD0-1396	CPD0-1396 [ C12 H18 N5 O3 S, tgt=87.54, overall=87.54 ]			(295.1037, 250634.31)(296.107, 27187.154)(297.10815, 5404.2607)(295.1048, 750509.1)(296.1078, 82216.54)(297.109, 15497.96)(312.1303, 244.53)(339.1093, 145.62)	8.2358
methylglyoxalbis(guanylhydrazone)	1	1	1	1	1	1	1	1	1	1	1	1	1	1	1	1	1	1364356	1	1	CPD0-1398	CPD0-1398 [ C5 H14 N8, tgt= ]			(209.1287, 42405.91)(210.1314, 3737.95)	2.835
5'-(aminoiminomethyl)amino-5'-deoxyadenosine	195464	981606	478877	561319	613507	512063	349575	620653	573731	1870460	569970	524172	192794	204156	238732	254602	302235	358462	330659	485336	CPD0-1401	CPD0-1401 [ C11 H17 N8 O3, tgt=60.48, overall=60.48 ]			(314.15863, 3074.8)(311.91037, 694.6325)(328.1757, 1338.96)(312.67215, 1897.9225)(332.1345, 30429.496)(333.1347, 4090.4712)(334.1399, 1213.27)(316.6305, 1362.85)	1.86
5'-[(3-aminopropyl)-amino]-5'-deoxyadenosine	1	128877	1	1	1	1	581611	1	1	1	421348	1	1	1	259644	1	1415866	362032	897378	1	CPD0-1402	CPD0-1402 [ C13H23N7O3, tgt= ]			(307.17538, 26091.129)(308.17963, 3540.3083)(327.1986, 333.41)(344.2258, 4229.2)(349.1814, 1051.25)(331.17252, 8888.439)	4.741
5'-[(3-aminopropyl)methylamino]-5'-deoxyadenosine	1	1	191204	279187	1	1	550348	1	265148	1	971472	376185	1	1	1	1	946138	1	742494	1	CPD0-1403	CPD0-1403 [ C14 H25 N7 O3, tgt= ]			(339.204, 4823.46)(326.2006, 1384.72)(339.23285, 14874.857)(340.23627, 2157.605)(362.20047, 19690.186)(363.20413, 3251.475)	18.0064
9-[6(RS)-8-diamino-5,6,7,8-tetradeoxy-&beta;-D-ribo-octofuranosyl]-9H-purin-6-amine	1	128877	1	1	1	1	581611	1	1	1	421348	1	1	1	259644	1	1415866	362032	897378	1	CPD0-1404	CPD0-1404 [ C13H23N7O3, tgt= ]			(307.17538, 26091.129)(308.17963, 3540.3083)(327.1986, 333.41)(344.2258, 4229.2)(349.1814, 1051.25)(331.17252, 8888.439)	4.741
9-[6(RS)-C-carboxamido-5,6,7-trideoxy-&beta;-D-ribo-octofuranosyl]-9H-purin-6-amine	145911	1056899	554936	531607	315247	501445	402460	1	828902	211462	393378	151698	199556	173913	469184	1	452038	302537	463713	248349	CPD0-1405	CPD0-1405 [ C14 H20 N6 O5, tgt=57.09, overall=57.09 ]			(337.42377, 1116.3514)(376.9348, 1835.4)(378.149, 115.46)(340.15952, 1155.318)(373.18335, 44892.42)(374.18655, 6096.2573)(375.19562, 1580.8)(353.15747, 15714.05)(354.1607, 2514.5576)(361.26382, 2731.1965)(362.1455, 5935.04)(355.17252, 118892.23)(356.177, 34151.414)(357.1792, 5253.072)	4.65042
9-[6(S),9-diamino-5,6,7,8,9-pentadeoxy-&beta;-D-ribo-nonafuranosyl]-9H-purin-6-amine	1	1	1	1	1	1	550348	1	1	1	971472	1	1	1	1	1	946138	1	742494	1	CPD0-1406	CPD0-1406 [ C14H25N7O3, tgt= ]			(339.204, 4823.46)(326.2006, 1384.72)(362.20047, 19690.186)(363.20413, 3251.475)	17.689
5-deoxypyridoxal	564537	675880	4138888	1364790	481484	478543	199315	214363	5800485	771072	305814	306470	486600	4699393	792392	1677350	118336	305761	194707	668017	CPD0-1408	CPD0-1408 [ C8 H9 N O2, tgt=63.33, overall=63.33 ]			(151.92188, 8374.847)(156.0776, 1417.87)(134.78485, 4515.1777)(136.0635, 127153.02)(137.0651, 9072.7)(155.15482, 5653.1016)(153.0647, 855.54)(135.77654, 51967.41)(137.06499, 5928.4897)(174.11343, 2700.8054)(151.0821, 133.23)(175.06004, 2132.6367)(156.7826, 39759.824)(157.37508, 4856.433)(158.04129, 11181.641)	1.878
dipalmitoyl phosphatidate	875252	389534	808037	119626	306859	515275	982045	294615	2182219	1293524	1	523150	173056	1090112	293549	194308	884289	398467	884902	195051	CPD0-1422	CPD0-1422 [ C35 H67 O8 P, tgt=46.18, overall=46.18 ]			(650.3577, 4364.9087)(632.4735, 605.45496)(651.4798, 2926.89)(648.4884, 425.47)(629.8885, 5815.382)(666.627, 11996.45)(668.484, 4382.202)(646.5989, 6176.0527)(669.7477, 3700.4844)(670.45496, 2480.3774)(653.45135, 5396.392)(654.4554, 1894.76)	20.3593
UO<sup>2+</sup>	1	1	1	1	1	1	1	1	1	146491	212704	1	1	1	138072	1	1	1	1	1	CPD0-1437	CPD0-1437 [ O2 U, tgt= ]			(273.0466, 6386.6)(270.0519, 682.83)(273.0475, 6477.89)(275.0602, 8645.03)(276.0554, 1409.33)(287.40955, 27784.232)(288.40732, 4808.09)(290.0762, 4378.98)(290.0227, 11876.37)(294.0385, 349.22)	1.884
diimidotriphosphate	108371	107189	108525	90313	142531	107052	189818	108231	105707	78458	172136	96815	103488	98498	115001	173120	176442	202306	149077	155646	CPD0-1438	CPD0-1438 [ H7 N2 O8 P3, tgt=71.56, overall=71.56 ]			(255.94121, 8608.394)(256.94006, 1319.4706)(257.93866, 1039.1257)(260.9633, 763.72)(242.9529, 2171.1858)(276.54886, 1019.12933)(276.97748, 1251.765)(259.80264, 588.4067)(260.46667, 1024.035)	1.394
cumene hydroperoxide	171207	1	184583	158966	1	138088	1	138542	133400	280671	348530	160773	163870	1	1	170232	197292	1	164208	1	CPD0-1449	CPD0-1449 [ C9 H12 O2, tgt=13.58, overall=13.58 ]			(152.07889, 8171.75)(136.07541, 1186.375)(138.092, 11567.359)(139.0947, 430.04)(176.27293, 2099.746)(180.0886, 344.87)	2.75
1,3-propanediol-P	150881	1	1	1	150420	166752	982319	1	166893	163148	1076753	123609	137156	119557	1	164723	768227	1056632	1063374	140314	CPD0-1458	CPD0-1458 [ C3 H7 O5 P, tgt=45.01, overall=45.01 ]			(179.13954, 425.5057)(180.00146, 370.79)(139.00337, 23548.227)(154.00345, 14360.291)(157.01254, 16306.478)	1.928
gabaculine	1873815	105962	1590865	1355853	77734	1508355	1231908	1640913	1684787	1425646	615162	1530748	1228709	1562804	2416071	1404429	1140793	869405	78197	1806016	CPD0-1467	CPD0-1467 [ C7 H9 N O2, tgt=36.14, overall=36.14 ]			(139.23698, 34828.703)(123.11429, 21984.582)(124.0572, 545.435)(141.07358, 463.1225)(124.82024, 2210.5562)(126.0734, 330.51)(160.10681, 5136.324)(144.10243, 7215.1885)(164.72394, 15977.788)(166.06094, 1822.092)(145.049, 2252.23)	1.844
dXMP	202669	152200	170954	227098	230245	236959	1	164546	292587	242931	172830	172544	216983	210985	217421	224651	1	1	1	208581	CPD0-1468	CPD0-1468 [ C10 H11 N4 O8 P, tgt=28.12, overall=28.12 ]			(333.0323, 1056.6526)(330.43817, 378.648)(347.9981, 2117.937)(349.56207, 895.985)(369.0126, 1274.66)(351.01816, 10584.441)	1.926
6-formylpterin	471388	128461	1	1	90457	95449	69181	129154	108971	405007	1	628663	718659	167410	532819	98982	1	1	1	156519	CPD0-1471	CPD0-1471 [ C7 H5 N5 O2, tgt=50.22, overall=50.22 ]			(192.58176, 3573.2915)(175.03654, 2359.258)(177.0364, 713.18)(192.0559, 12522.051)(193.05672, 2178.47)(174.04587, 1421.5701)(210.75, 2929.6934)(192.27051, 3148.857)(215.64201, 2817.878)(216.70543, 1103.7899)(198.0283, 4639.661)	2.18633
tetrahydropteroyl-&alpha;-glutamylglutamate	3917500	2450599	3128953	1	1744666	135285	501674	2329222	1	426344	312856	318801	493376	3120601	522211	1	1	188125	297810	220177	CPD0-1472	CPD0-1472 [ C24 H27 N8 O9, tgt=58.44, overall=58.44 ]			(572.4634, 6291.7563)(573.90985, 1756.3127)(576.40717, 1528.008)(577.1913, 1020.56)(556.1843, 10001.943)(554.19336, 3295.5967)(578.2107, 5223.8003)(590.21216, 6234.8726)(590.2143, 584.5234)(595.16675, 84491.78)(596.16974, 27340.42)(597.1722, 8264.83)(598.17456, 571.35)	7.489
5-methyl-tetrahydropteroyl-&alpha;-glutamylglutamate	1	86825	1	1	1	1	1	1	1	1	118954	1	1	1	1	1	369993	1	222708	305909	CPD0-1474	CPD0-1474 [ C25 H29 N8 O9, tgt=12.03, overall=12.03 ]			(589.2123, 7733.12)(590.2151, 1477.14)(571.1896, 7085.6104)(570.189, 2200.55)(585.2307, 6850.63)(586.2354, 1541.52)(591.20197, 13128.305)(592.2051, 2532.675)	6.735
3-deaza-GMP	1	1	1	1	1	393369	1	1	1	210675	1	1	1	177310	1	1097885	1	1	1	1	CPD0-1493	CPD0-1493 [ C11 H13 N4 O8 P, tgt= ]			(378.08868, 23292.254)(379.09396, 5390.723)(365.08545, 1022.18)	4.912
N-amino DAP	18066396	13966695	6343306	6606658	6071709	5607103	20064278	6191540	8374103	15797618	20112274	17239936	19141268	4990537	19798704	6354489	14162526	14325742	15359701	5580749	CPD0-1498	CPD0-1498 [ C7 H14 N3 O4, tgt=82.56, overall=82.56 ]			(205.09824, 562014.94)(206.25154, 52070.152)(207.10323, 4156.4536)(223.13411, 570.24005)(205.1215, 310.32)(227.74959, 6363.933)	4.226
N-hydroxy DAP	1788831	2992620	2731731	2342288	1751321	1389769	53572392	2186078	2810312	2053323	52653844	48616024	1920366	2436196	1360336	2611262	38200088	37874088	42863384	1696909	CPD0-1499	CPD0-1499 [ C7 H13 N2 O5, tgt=93.48, overall=93.48 ]			(188.07173, 1335558.1)(189.07483, 150707.75)(190.07722, 11666.263)(206.18642, 7614.189)(210.0618, 72344.7)(211.06458, 7335.578)(212.06578, 425.65375)	2.6986
4-methylene diaminopimelate	1	1	1	1	1	1	252996	1	1	1	1	1	1	1092546	186422	1	529824	129988	315435	1	CPD0-1500	CPD0-1500 [ C8 H14 N2 O4, tgt=35.26, overall=35.26 ]			(206.10275, 4522.8223)(187.42456, 2877.0632)(190.10796, 4252.5933)(229.43013, 814.63995)(212.09164, 1145.09)	2.49471
(2S,3R,6S)-3-fluoro-2,6-diaminopimelate	1	1	1	1	1	1	285914	1	1	1	1	1	1	1	1	1	237101	1	637986	1	CPD0-1501	CPD0-1501 [ C7 H13 F N2 O4, tgt= ]			(209.09335, 2093.545)(190.0768, 14839.62)(192.75334, 5026.07)(236.09311, 1162.3049)	3.98191
3-chlorodiaminopimelate	4172828	1463552	2999380	3049445	1065997	4300422	1	3300592	4111317	4676943	3895061	3379833	4013890	1	4034404	2886323	986852	1373931	3366235	2416697	CPD0-1502	CPD0-1502 [ C7 H13 Cl N2 O4, tgt=49.91, overall=49.91 ]			(227.05023, 217.21333)(206.44507, 1013.8949)(207.05074, 1156.7689)(208.0646, 252.97751)(242.08754, 1911.4199)(224.07755, 3712.1682)(247.0442, 12118.204)(248.05046, 563.86304)(229.73897, 4493.597)(230.0341, 291.73)	1.619
O-methylserine	852594	616331	709446	623924	944903	396304	1341732	778799	534719	969902	1067305	241330	828787	372459	1689682	696134	937942	1058535	1091067	1035788	CPD0-1507	CPD0-1507 [ C4 H9 N O3, tgt=52.89, overall=52.89 ]			(121.06536, 136169.08)(122.31859, 8004.3364)(123.06913, 317.73666)(102.80313, 3888.0012)(120.18354, 22371.498)(122.0691, 14492.68)(123.070404, 435.90503)(102.05538, 3679.5288)(138.09161, 22020.188)(139.09476, 1184.9036)(143.05193, 1023.2582)(146.05965, 568.43)(124.08992, 13696.239)(125.03849, 562.5256)	1.861
&alpha;-oxo-1-carboxy-5,6-dihydrothiopyranpropanoate S-oxide	212115	941569	196920	179441	1218276	114131	964921	185358	1571015	1396444	160976	1261400	982847	1490655	1377845	1085750	1254755	935447	118239	924282	CPD0-1525	CPD0-1525 [ C9 H8 O6 S, tgt=43.08, overall=43.08 ]			(244.35648, 12750.401)(246.33673, 4778.9434)(227.7395, 89994.45)(226.98936, 10991.661)(227.98636, 4247.607)(245.00748, 6724.511)(246.01561, 576.22003)(229.00394, 2240.941)(244.03395, 1975.4551)(269.987, 737.64)(250.9858, 433.67)	1.41
2-(4-amino-4-carboxybutyl)aziridine-2-carboxylate	131341	378585	157841	156671	301762	367702	333720	165874	243549	627430	161530	450747	730337	200947	1115852	193465	143266	145153	128100	297119	CPD0-1537	CPD0-1537 [ C8 H13 N2 O4, tgt=42.98, overall=42.98 ]			(184.07439, 11271.833)(188.09267, 12996.196)(224.07748, 6958.857)(187.02391, 9833.718)(220.1186, 3891.427)(206.1025, 10600.13)	2.097
Bz<sub>2</sub>ATP	535631	290980	377580	630183	1	490736	1	233870	346166	515710	1	356500	1036934	318755	620270	1056956	1	1	1	958477	CPD0-1552	CPD0-1552 [ C24 H20 N5 O15 P3, tgt=0.08, overall=0.08 ]			(712.0089, 11579.593)(713.0102, 1440.32)(734.02203, 6168.8755)(735.02344, 274.865)	19.121
3-propylphosphoenolpyruvate	1	1	1	134760	1	1	1	1	182093	1	1	1	1	1	1	1	1	1	1	1	CPD0-1554	CPD0-1554 [ C6 H8 O6 P, tgt= ]			(225.03806, 9140.765)(226.0506, 904.91)	5.145
3-methylphosphoenolpyruvate	158328	383464	240486	1	474847	1	143448	1	1	145178	135250	1	145318	206880	1	321256	306942	1	252591	357190	CPD0-1555	CPD0-1555 [ C4 H4 O6 P, tgt=46.40, overall=46.40 ]			(181.9835, 397.34668)(182.9836, 311.07)(180.18512, 859.54395)(180.9905, 372.24)(197.0057, 247.97202)(179.36003, 9413.129)(180.36603, 1392.2201)(180.99265, 612.26794)(202.97171, 2823.7947)(184.9613, 9334.706)(185.96239, 1145.0011)	1.461
L-dihydrophenylalanine	2631432	1	1412349	1399435	899312	1416785	1941579	1515366	1393163	3434776	2052702	3366264	2932027	1241619	6055165	1631179	2531414	2015077	1650476	1369896	CPD0-1557	CPD0-1557 [ C9 H13 N O2, tgt=47.52, overall=47.52 ]			(167.09033, 64277.664)(168.1015, 19518.094)(169.10516, 623.05664)(150.09198, 776.44995)(172.1332, 2696.4)(191.08235, 3705.4968)	2.724
&beta;-2-thienyl-D,L-Alanine	1849368	1504272	1581039	1478765	750363	897674	976171	780784	1808269	1920501	1134256	1746335	1353244	1923681	2091084	1416226	663742	3292234	437410	1763215	CPD0-1558	CPD0-1558 [ C7 H9 N O2 S, tgt=53.46, overall=53.46 ]			(173.53406, 2417.483)(172.0299, 295.78333)(155.65205, 2598.4844)(158.02295, 780.05505)(175.03802, 2517.3801)(157.0333, 421.43)(193.07042, 1203.3838)(171.74548, 2548.6614)(198.02762, 4003.3845)(199.02446, 607.89)(176.01164, 50346.09)(177.02046, 6536.2417)(178.01074, 2932.1035)	1.594
L-thiazolidine-4-carboxylate	814327	365548	614154	799574	1	302574	309744	398174	1453165	544243	809441	98486	267705	718849	841142	205593	295630	362045	402340	605736	CPD0-1571	CPD0-1571 [ C4 H7 N O2 S, tgt=40.26, overall=40.26 ]			(135.01373, 1652.1016)(115.00758, 5858.28)(116.01524, 373.66248)(137.24857, 4959.8955)(138.42964, 8733.202)(139.03241, 3590.07)(116.0146, 1303.116)(152.23956, 6658.4404)(153.38474, 1237.5883)(154.05045, 1121.435)(134.0456, 144.42)(157.74265, 21153.945)(158.90569, 13929.447)(161.01143, 3404.4434)(141.31873, 99313.54)(143.00227, 64635.344)	1.9944
N10-formyl-2,4-diaminodideazafolate	234606	236347	184191	255568	138525	185399	1	131874	238900	479333	1	101444	316457	221932	361101	151881	1	1	1	94512	CPD0-1574	CPD0-1574 [ C22 H21 N5 O7, tgt=47.62, overall=47.62 ]			(472.161, 2384.3418)(473.1625, 2569.504)(453.0477, 31536.182)(455.15378, 217026.52)(472.13007, 5281.2563)(473.1281, 1190.86)	4.62433
N10-(bromoacetyl)-5,8-dideazafolate	100461	1	1	148154	303092	103118	1	1	1	113360	1	1	249496	1	135471	277704	1	1	1	253482	CPD0-1576	CPD0-1576 [ C23 H20 Br N5 O7, tgt=23.09, overall=23.09 ]			(541.0367, 3186.975)(541.0386, 5508.05)(585.0629, 1769.4149)(570.05365, 1805.4277)	18.99
trimethoprim	1	1	1	1	1	1	8075780	1	1	1	9727535	13047615	1	1	1	1	1	1	1	1	CPD0-1581	CPD0-1581 [ C14 H18 N4 O3, tgt= ]			(295.1081, 699214.8)(296.1112, 77582.53)(297.11243, 14505.957)	8.616
pyrimethamine	1	1	1	298013	140198	1	552677	1	326548	1	652681	684013	1	455577	397213	1	582077	335749	441229	1	CPD0-1583	CPD0-1583 [ C12 H14 Cl N4, tgt=20.57, overall=20.57 ]			(252.0935, 9489.68)(254.35538, 2780.9148)(267.12115, 21561.262)(268.12436, 1353.3187)(269.136, 227.07)	7.11136
2,4-diamino-6-ethyl-5,3'-(2-cyclohexylphenoxy)prop-1'-yloxypyrimidine	5917585	15333737	16263553	5198733	17783320	3806338	6060415	14354835	5297462	5833536	6324104	14827466	12873646	4790613	6324154	14836489	6515721	6006401	6076783	14249383	CPD0-1584	CPD0-1584 [ C23 H32 N4 O3, tgt=57.10, overall=57.10 ]			(396.43304, 1214.0789)(399.25616, 1674.3844)(413.26715, 299080.8)(414.2701, 72293.3)(415.27264, 9228.041)	22.246
2,4-diamino-6-ethyl-5,3'-(2-trifluoromethylphenoxy)prop-1'-yloxypyrimidine	694511	571897	579389	585630	380071	606920	1	677702	698294	1	2819949	274335	1	1069802	911889	543707	459040	1	3185306	415569	CPD0-1585	CPD0-1585 [ C16 H19 F3 N4 O2, tgt=74.20, overall=74.20 ]			(357.81046, 3935.0198)(339.46786, 61307.535)(339.1336, 6369.8203)(340.12848, 468.35498)(360.30942, 4090.9272)(359.1675, 695.12)(339.1421, 726.5)(374.1876, 1870.37)(358.01947, 16853.21)(359.17822, 665.34625)(379.44504, 36297.883)(380.4483, 5354.4917)	8.44985
2,4-diamino-6-methyl-5,3'-(3-nitrophenoxy)prop-1'-yloxypyrimidine	1088588	512326	680053	278154	392116	637530	1430851	932961	649479	599946	1387420	782433	1056497	1177665	684999	542307	1509089	1311707	1462251	746329	CPD0-1586	CPD0-1586 [ C14 H19 N5 O4, tgt=75.17, overall=75.17 ]			(340.021, 30073.484)(340.18213, 5478.569)(321.16193, 971.18494)(326.11765, 10674.83)(327.11996, 6124.1836)	9.379
2,4-diamino-6-methyl-5,3'-(2-trifluoromethylphenoxy)prop-1'-yloxypyrimidine	4861715	4270058	4493233	4254424	4495786	1	359828	1	4768350	1	329439	7475842	4416046	1	4704845	1	12332043	316840	1	861996	CPD0-1587	CPD0-1587 [ C15 H17 F3 N4 O2, tgt=54.12, overall=54.12 ]			(347.14194, 2060.1333)(325.11575, 171665.11)(326.11868, 20560.824)(327.12103, 4432.2744)(363.39993, 2701.4001)(363.66602, 1203.9601)(366.1151, 4627.6167)(367.12222, 1981.38)(349.1245, 35718.41)(350.1274, 5394.08)	8.55859
2,4-diamino-6-methyl-5,3'-(3-trifluoromethylphenoxy)prop-1'-yloxypyrimidine	4861715	4270058	4493233	4254424	4495786	488310	359828	1	4768350	8032177	329439	7475842	4416046	834730	4704845	1	12332043	316840	1	861996	CPD0-1588	CPD0-1588 [ C15 H17 F3 N4 O2, tgt=54.12, overall=54.12 ]			(345.9393, 2492.9282)(345.14716, 648.71)(325.04993, 161126.05)(326.11862, 20748.781)(327.12088, 4364.191)(343.1439, 1435.14)(328.12634, 1513.8)(363.39993, 2701.4001)(363.66602, 1203.9601)(366.1151, 4627.6167)(367.12222, 1981.38)(349.1245, 35718.41)(350.1274, 5394.08)	7.957
1-(p-butylphenyl)-2,2-dimethyl-4,6-diamino-1,2-dihydro-s-triazine	259675	356202	640299	1	1	230809	1	1	1	1	1	554687	229969	312068	237674	273555	1	1	1	306512	CPD0-1590	CPD0-1590 [ C15 H23 N5, tgt=27.97, overall=27.97 ]			(274.20206, 16065.689)(275.2053, 1109.3379)(291.23242, 20079.014)(292.2357, 2283.5)	11.3045
5-[[4-methoxy-3-(phenylmethoxy)phenyl]methyl]-2,4-pyrimidinediamine	384535	369034	571228	493492	475130	531235	1	409428	533869	500264	1	364894	668661	995175	1043207	554795	1023983	811216	817834	734888	CPD0-1591	CPD0-1591 [ C19 H20 N4 O2, tgt=59.90, overall=59.90 ]			(337.6919, 28233.588)(338.166, 4690.5083)(319.1501, 35597.02)(320.1526, 4858.16)(319.15207, 39931.145)(320.15482, 5957.1465)(356.18967, 4098.2104)(361.14722, 4870.127)	7.58511
2,4-diamino-6-ethyl-5,3'-(2-trifluoromethyl-4-sulphonamidophenoxy)prop-1'-yloxypyrimidine	330824	196224	318945	156416	210269	222935	1	337484	398414	387473	1	175349	353206	552160	268937	327436	1	1	1	121325	CPD0-1594	CPD0-1594 [ C16 H20 F3 N5 O4 S, tgt=75.87, overall=75.87 ]			(435.12723, 17948.393)(436.13052, 2765.8477)(457.1569, 132907.39)(458.15976, 22572.604)(459.16153, 3489.8591)	9.13
moiramide B	484160	245756	365160	138827	176289	273301	1	242975	410385	707834	1	1	261199	1	377203	228156	3104425	2596481	3680734	162357	CPD0-1598	CPD0-1598 [ C25 H31 N3 O5, tgt=47.61, overall=47.61 ]			(455.22052, 5645.9175)(457.2399, 2449.55)(437.72394, 10060.883)(437.89136, 1246.67)(438.36917, 9572.025)(438.5631, 2725.7766)(476.27335, 2836.2217)(476.275, 3075.75)(458.6049, 2497.9534)(459.2773, 271.86)(478.55313, 4340.498)(478.2195, 1368.82)(479.238, 4433.89)(461.55542, 2555.7131)(459.2237, 1569.68)	8.35675
fusidate	553861	2745036	1558148	1	250877	501166	646563	1866567	2515559	582619	1942690	1798984	2630274	555764	1138505	1790595	1987231	2009629	1540323	677108	CPD0-1606	CPD0-1606 [ C31 H47 O6, tgt=59.42, overall=59.42 ]			(516.7025, 8843.393)(518.01483, 9536.579)(520.591, 29721.63)(521.3437, 9255.3)(498.32602, 3472.8335)(498.31525, 1287.13)(518.1483, 3571.464)(519.34875, 37823.953)(520.84265, 24036.05)(522.3469, 2024.8)(498.74365, 1632.374)(499.3376, 82.34)(534.8689, 3783.8452)(535.57654, 6216.1006)(536.3758, 1857.8999)(517.70306, 14108.523)(521.3626, 7531.53)(539.5924, 5291.17)(541.725, 1516.1399)(542.9252, 1959.…	16.7552
2-methylaspartate	742477	259593	261647	236773	399977	159421	469820	402774	269907	483296	391677	712294	373077	187985	1306647	80367	722639	318681	771704	448427	CPD0-1614	CPD0-1614 [ C5 H8 N O4, tgt=76.10, overall=76.10 ]			(147.86583, 7156.617)(150.0582, 13950.03)(131.29405, 1053.8275)(133.0485, 233.93)(149.92497, 10564.932)(150.0569, 13026.12)(131.35532, 3616.3726)(133.05264, 1287.668)(164.63283, 9177.463)(150.07767, 19662.648)(151.0807, 993.97284)(169.03575, 6333.13)(170.04568, 559.8083)	1.874
6-diazo-5-oxonorleucine	1	1	1	1	138679	1	186052	11573048	1	1	951634	1	1	1	1	224261	642277	1	938954	1	CPD0-1627	CPD0-1627 [ C6H10N3O3, tgt= ]			(173.57779, 2233.235)(174.0762, 1770.17)(173.0795, 7205.7695)(157.077, 1596.72)(160.0757, 3044.48)(192.97157, 13702.749)(176.107, 5934.28)(195.0661, 11037.883)(177.05525, 22681.28)(178.0586, 3051.95)	6.2048
8-aminoethyl-2,6-anhydro-3,8-dideoxy-D-glycero-D-talo-octonate	1	1	1	1	1	1	559133	1	1	1	604903	170230	1	1	1	1	373490	190908	531517	1	CPD0-1647	CPD0-1647 [ C8 H15 N O6, tgt= ]			(221.09277, 11344.206)(222.09627, 247.01666)(203.08101, 2270.59)(245.07698, 426.21167)	2.103
2-amino-3-(phosphomethylphosphinyl)propanoate	2686223	2016894	2283223	1978800	1787533	2530552	935125	2355690	2715555	2323361	907806	1779167	2216174	2021649	2025162	1914613	965119	789384	533254	2194715	CPD0-1650	CPD0-1650 [ C4 H9 N O7 P2, tgt=79.40, overall=79.40 ]			(229.97534, 4632.86)(249.00159, 6167.3833)(230.99118, 66808.695)(232.04814, 4395.7407)(232.99254, 5178.2324)(263.0174, 125888.81)(264.02066, 8528.749)(245.00696, 4769.3853)(268.98273, 26762.574)(270.5719, 2597.1)(271.70755, 5236.02)(272.97845, 3053.5125)(253.87346, 3514.268)(254.9745, 4804.5034)	1.628
&alpha;-monofluoromethylagmatine	473482	335337	500843	399710	1376204	513601	403293	424088	465012	632849	385236	1030208	449578	307315	585170	583517	432900	319656	344342	621509	CPD0-1661	CPD0-1661 [ C6 H15 F N4, tgt=37.25, overall=37.25 ]			(163.13344, 3124.4644)(185.11551, 21937.037)(186.11873, 1049.4514)	6.16
&alpha;-difluoromethylarginine	2249944	1608543	737745	178375	683208	641826	2406701	186225	208908	1995495	2411164	172129	2384601	249090	2484917	210408	1780005	1698565	1956111	608032	CPD0-1663	CPD0-1663 [ C7 H14 F2 N4 O2, tgt=47.87, overall=47.87 ]			(229.11606, 1497.19)(206.10168, 55012.82)(207.10316, 5629.2593)(211.1113, 220.51)(227.13994, 4475.678)(252.10953, 3181.5898)(234.09814, 360.85004)	3.5761
cycloheptadienyl	1	1	1	1	1	157118	212669	1	1	1	240227	1	1	1	1	1	1	212029	226621	1	CPD0-1681	CPD0-1681 [ C11 H10 O5, tgt=9.42, overall=9.42 ]			(205.0454, 208.99)(206.0526, 837.52)(206.30728, 2375.9302)(245.09953, 4546.5)(223.5755, 1134.4801)(247.0425, 752.01746)(229.0323, 1509.7524)	2.606
3-undecyl-2-hydroxyl-1,4-naphthoquinone	149483	222029	207613	133233	347913	95965	325072	112615	100217	97823	1000772	88521	273555	111596	160671	108382	686187	403654	221227	1	CPD0-1689	CPD0-1689 [ C22 H30 O2, tgt=15.51, overall=15.51 ]			(327.2326, 3126.02)(309.2225, 1992.47)(327.2319, 2863.39)(309.22165, 2440.2878)(346.2718, 2763.97)(326.2425, 9725.342)(327.24774, 1590.5)(351.01572, 3668.27)(334.85327, 4931.72)(336.2237, 367.79)	15.949
L-indospicine	1351356	914004	1182332	918874	936281	1174115	1852861	837510	1194198	1529654	1463919	1925622	1006586	1224431	1264888	641614	452604	1236948	424590	634828	CPD0-1690	CPD0-1690 [ C7 H16 N3 O2, tgt=44.46, overall=44.46 ]			(174.12335, 18028.855)(178.13785, 480.61)(179.1443, 995.91)(161.13336, 2852.395)(193.15938, 798.74274)(196.1708, 4939.55)(175.14896, 4017.28)(197.11792, 50366.6)(198.12154, 4646.4746)(179.10709, 7238.9927)	8.2257
O-[L-norvalyl-5]-isourea	960641	1	1	353567	1	1	352969	297511	367251	855476	231276	909937	89164	1	1058064	326762	731314	853668	817001	1	CPD0-1691	CPD0-1691 [ C6 H14 N3 O3, tgt=57.80, overall=57.80 ]			(176.10707, 10879.982)(177.1105, 752.84)(159.09265, 33258.34)(160.09444, 3331.483)(160.1064, 454.77)(164.1072, 13846.64)(194.1358, 9422.534)(178.13274, 13118.882)(179.1352, 1788.54)(182.0813, 58810.25)(183.0846, 4542.74)	4.07447
5-(chloromercuri)cytidine	209413	1	108996	183372	117318	111593	1	1	1	124021	1	1	222774	89775	434155	139551	1	1	1	104976	CPD0-1711	CPD0-1711 [ C9 H12 Cl Hg N3 O5, tgt=47.51, overall=47.51 ]			(477.00195, 2915.1497)(484.0171, 344.14502)(455.01196, 1074.04)(493.04065, 2311.9866)(479.03995, 2891.0667)(501.10352, 8673.665)(506.5121, 2707.7)(507.50964, 3472.3474)(509.0196, 4282.79)(485.75522, 3376.4487)(492.99658, 5767.983)	16.6938
5-mercuriocytidine	259485	1	1	1	1	104963	100161	73400	1	250828	116696	127699	205648	89573	226200	136058	79055	116428	136579	1	CPD0-1712	CPD0-1712 [ C9 H12 Hg N3 O5, tgt=45.73, overall=45.73 ]			(449.0569, 1808.2528)(451.0706, 221.67)(423.44232, 2757.018)(449.05753, 3289.1)(425.04205, 3909.334)(457.0905, 443.07)(445.08606, 1766.7866)(465.48578, 5317.187)(466.04346, 481.985)(467.0413, 658.845)	1.542
6-methyl-H2-pterin	221530	3074501	716781	226132	511338	769074	1095740	187938	1	447016	1	1	1	314337	354565	995180	2191068	1	1826250	1	CPD0-1715	CPD0-1715 [ C7 H7 N5 O, tgt=47.62, overall=47.62 ]			(177.06808, 9692.75)(160.05565, 2752.422)(162.05667, 238.0925)(163.0598, 783.47)(180.79149, 1841.0057)(183.0842, 263.36)(164.07236, 255.56)(195.1015, 121.61)(179.42468, 2033.21)(180.09201, 1180.335)(203.2002, 1160.6357)(184.55275, 138.41501)	4.81847
2-amino-6-hydroxymethyl-7,7-dimethyl-7,8-dihydropteridin-4-one	19915606	15328044	6970334	7256243	6632540	6150028	21905266	6786712	9251987	17513312	21952100	18910902	21106076	5486191	21815676	7007552	15508001	15587481	16827028	6091442	CPD0-1716	CPD0-1716 [ C9 H13 N5 O2, tgt=73.37, overall=73.37 ]			(205.09824, 561064.25)(206.1012, 65416.043)(207.1033, 4713.58)(223.13411, 570.24005)(228.08337, 615.0625)	4.226
2-amino-6-carboxamido-7,8-dihydropteridin-4-one	239251	180818	141982	1	132592	100717	1	1	155008	156047	1	220292	161427	171565	182910	91391	1	1	1	151512	CPD0-1717	CPD0-1717 [ C7 H8 N6 O2, tgt=50.00, overall=50.00 ]			(211.82481, 1859.6613)(213.07889, 6125.718)(211.35646, 2260.1064)(191.07103, 3364.0972)(230.11833, 1258.53)(232.0596, 3766.4)(214.05002, 3658.7336)	3.9758
7,8-dihydropterin	1426518	833528	1222045	696742	877332	935767	781113	550443	1	1443941	497642	732990	730682	1083268	1077874	1472644	772043	1	793177	702882	CPD0-1718	CPD0-1718 [ C6 H7 N5 O, tgt=71.42, overall=71.42 ]			(166.06834, 837.3516)(149.9406, 7577.4116)(151.94049, 21869.371)(152.0572, 6107.44)(166.64603, 3856.9849)(148.06111, 18079.506)(149.06482, 257.66498)(187.1083, 968.8425)(166.0857, 164.9)(191.05687, 1540.2631)(170.04686, 1243.2108)	1.842
<i>sn</i>-1,2-di(2-propylpentanoyl)glycerol	424179	1	1	811841	342281	480232	1	378566	828673	347591	1070599	475725	959818	393516	938692	1	684416	219648	1	1	CPD0-1759	CPD0-1759 [ C19 H36 O5, tgt=61.97, overall=61.97 ]			(326.2458, 16605.605)(327.24774, 1618.77)(362.29044, 2428.016)(348.2872, 2140.73)(367.24573, 14326.071)(368.2489, 1264.3019)	14.1841
1,2-dioctanoyl-1,2,4-butanetriol	1	1	570862	536477	1	1	156250	1	1	1	231933	640082	1	1	267267	1	124038	123019	122592	393378	CPD0-1760	CPD0-1760 [ C20 H38 O5, tgt= ]			(341.2661, 9605.256)(342.2691, 1001.4)(363.31036, 3536.114)(381.26135, 14624.862)(382.2645, 1347.8381)	16.6169
1,2-dioctanoyl-1,2,6-hexanetriol	4930042	2561823	3735791	4319524	3952596	160792	6241974	3260089	5354509	4642491	640304	131573	2913545	2119560	183070	3288475	435590	457968	5823254	2718311	CPD0-1761	CPD0-1761 [ C22 H42 O5, tgt=62.86, overall=62.86 ]			(371.3159, 1756.3947)(391.2847, 64372.145)(392.28778, 15176.523)(393.29684, 311.285)	22.6889
1,2-dioctanoyl-1,2,3-butanetriol	1	1	1	1	1	1	156250	1	1	1	231933	1	1	1	1	1	124038	123019	122592	1	CPD0-1762	CPD0-1762 [ C20H38O5, tgt= ]			(341.2661, 9605.256)(342.2691, 1001.4)(363.31036, 3536.114)	17.51
1,2-dioctanoyl-3-methyl-1,2,3-butanetriol	699830	453579	680786	898460	428090	620301	516966	784986	739384	578684	1	575826	1153975	822348	1115312	884440	709534	532128	1143055	869309	CPD0-1763	CPD0-1763 [ C21 H40 O5, tgt=78.94, overall=78.94 ]			(355.28354, 1414.9435)(375.52695, 4940.0684)(374.31366, 3753.062)(377.26642, 24964.135)(378.2697, 4328.1807)(379.2831, 756.1925)	18.471
2,3-dioctanoylglyceramide	152106	1	1	323756	225809	1	1	1	301087	1	1	434874	158366	1	1	202300	1	1	1	250781	CPD0-1807	CPD0-1807 [ C19 H35 N O5, tgt=0.75, overall=0.75 ]			(357.2603, 11455.359)(358.26276, 1306.39)(339.23282, 13216.428)(340.2363, 2473.2634)(358.2656, 742.54)(379.30444, 1382.0675)	16.2807
1,2-dioctanoyl-1-amino-2,3-propanediol	1	1	1	1	1	1	718863	1	1	1	694911	1	1	1	1	1	538976	400433	463995	1	CPD0-1808	CPD0-1808 [ C19 H37 N O4, tgt= ]			(348.2753, 6874.28)(362.31387, 4562.27)(343.2956, 29750.14)(344.2987, 4831.5303)(366.26126, 22338.068)(367.2643, 3496.7832)	11.2264
1,2-di-<i>S</i>-octyl-1,2-dimercapto-3-propanol	1015463	483764	1305657	1600649	986906	851218	966659	1630113	1633015	1277252	1805562	2219062	2302069	962361	2570622	608197	994156	1642625	1025798	1795764	CPD0-1809	CPD0-1809 [ C19 H40 O S2, tgt=65.98, overall=65.98 ]			(351.2517, 727.68)(337.2461, 350.76)(348.27487, 15894.238)(349.2781, 1863.9551)(353.2303, 59634.305)(354.23355, 9704.8955)(355.23508, 1008.73004)	10.817
1,2-di<i>-O-</i>octylglycerol	1	1	1	87716	1	1	3881590	1	82962	1	4307896	1	1	1	1	1	10757034	2441211	3612646	1	CPD0-1810	CPD0-1810 [ C19 H40 O3, tgt= ]			(300.28867, 1971.634)(318.30127, 13780.89)(319.30438, 909.47)(316.32126, 34584.133)(317.3244, 5656.698)(340.28284, 2960.7148)(324.2903, 226.78)	16.6633
1-monopalmitoylethylene glycol	245856	1	190424	206561	1	465467	418946	170079	175287	192110	659027	1	1	501028	292553	1	858772	704298	886757	1	CPD0-1811	CPD0-1811 [ C18 H36 O3, tgt=77.27, overall=77.27 ]			(284.2583, 600.96)(318.30084, 24583.463)(319.30396, 3499.657)(302.3045, 350.24)(306.2402, 7248.29)	15.1697
2-oleoylglycerol	1	1	103411	1	1	192195	642107	242336	435492	172968	1	292960	318221	218747	1	188145	426299	1	558867	188327	CPD0-1812	CPD0-1812 [ C21 H40 O4, tgt=47.15, overall=47.15 ]			(356.30243, 2577.545)(339.2884, 7135.93)(357.31543, 3547.4648)(379.43866, 6367.7676)(380.28763, 1011.2601)	18.5043
1,3-dioctanoylglycerol	889064	857649	1139555	1395161	873694	752481	850379	1413452	1421191	1104956	1566348	1925721	2007093	853503	2238654	547904	876905	1420444	896450	1570108	CPD0-1815	CPD0-1815 [ C18 H34 O5, tgt=80.78, overall=80.78 ]			(313.23767, 1180.4283)(348.27475, 15196.919)(349.278, 1754.8837)(353.2303, 58840.438)(354.2335, 9559.006)(355.23508, 989.37286)	10.817
1,3-dioctanoyl-1,2,3-butanetriol	1	1	1	1	1	1	156250	1	1	1	231933	1	1	1	1	1	124038	123019	122592	1	CPD0-1816	CPD0-1816 [ C20H38O5, tgt= ]			(341.2661, 9605.256)(342.2691, 1001.4)(363.31036, 3536.114)	17.51
UDP-6-deoxy-&alpha;-D-galactose	104649	1	1	124324	211961	85638	1	1	1	100070	1	1	191313	1	116661	207966	1	1	1	179534	CPD0-1898	CPD0-1898 [ C15 H22 N2 O16 P2, tgt=47.16, overall=47.16 ]			(549.7188, 11622.415)(550.2967, 12750.898)(551.04755, 1465.8634)(549.0642, 7990.805)(534.05347, 20182.71)(536.03986, 5760.996)	20.059
8-oxo-dGTP	1	1	1	1	1	1	1	1	1	1	282228	1	1	1	1	1	212804	1	1	1	CPD0-1905	CPD0-1905 [ C10 H12 N5 O14 P3, tgt= ]			(518.9749, 14465.335)(519.9757, 2306.635)(520.9641, 1368.74)	17.884
(S)-2-aminobutanoate	791940	1	586290	659440	650115	1	774753	1042881	880222	824711	531452	1118984	898050	442271	1119731	433153	754416	1	457394	737920	CPD0-1942	CPD0-1942 [ C4 H9 N O2, tgt=79.70, overall=79.70 ]			(104.071236, 46945.69)(105.07454, 1389.482)(130.06354, 890.2434)(111.76559, 621.9986)(112.0509, 177.85)	1.608
&gamma;-thiomethyl glutamate	104316	2802311	3070872	2955165	1	1982689	1	2707731	3312346	2713389	1	1598649	2415542	2761929	1973058	2955358	121081	1	494478	1	CPD0-2023	CPD0-2023 [ C6 H11 N O4 S, tgt=75.77, overall=75.77 ]			(193.03542, 26515.314)(194.03835, 642.5357)(176.25783, 4014.6597)(177.02354, 5804.36)(199.04546, 1982.5183)(177.0362, 345.71)(214.07121, 529.446)(193.06924, 1718.8)(218.89496, 88916.164)(219.96394, 21046.53)(220.95615, 7999.155)(221.0269, 17070.64)(198.51834, 1536.59)	2.04633
fluorofumarate	159574	93894	139391	142885	113206	99349	165223	117562	201524	1	127449	178965	161322	146087	1	177131	156383	104088	114697	1	CPD0-2038	CPD0-2038 [ C4 H3 F O4, tgt=30.31, overall=30.31 ]			(134.0013, 476.0)(116.9956, 994.87)(140.0246, 1548.61)(152.03716, 7764.7075)(153.03435, 6438.897)(139.03267, 11263.416)(139.9876, 827.18)	1.41
2,6-diaminopurine	171207	233654	184583	164303	1	138088	283837	138542	133400	286014	348530	160773	163870	1	1	170232	197292	364877	164208	1	CPD0-2060	CPD0-2060 [ C5 H8 N6, tgt=37.55, overall=37.55 ]			(152.0786, 8867.82)(176.19615, 3748.8843)(177.07095, 8958.732)	2.753
3,4,-dihydroxybutylphosphonate	307537	648453	558007	2326930	502120	373349	169273	419459	595155	402820	1840875	2456453	351383	481091	437814	2218931	210605	113318	149144	361868	CPD0-2099	CPD0-2099 [ C4 H10 O5 P, tgt=76.63, overall=76.63 ]			(171.0289, 16664.96)(172.03038, 2662.7573)(151.41792, 6394.556)(152.0165, 965.07)(174.04575, 1559.035)(153.0241, 6295.0024)(187.48627, 20311.432)(188.07928, 8746.348)(169.05072, 17870.512)(170.05176, 17758.2)(192.0119, 4441.45)(176.01147, 57896.402)(177.93391, 3421.2422)(178.0107, 4428.61)	1.9649
1-stearoyl-<i>sn</i>-glycerol 3-phosphate	281387	185419	466186	278116	274344	517416	325897	498265	417206	517099	205215	212282	400852	711167	701017	236097	370145	300369	249774	187999	CPD0-2113	CPD0-2113 [ C21 H41 O7 P, tgt=76.95, overall=76.95 ]			(423.27252, 4114.6025)(423.27496, 4550.8013)(424.2777, 667.15)(454.29303, 21598.088)(455.29608, 3752.4434)(445.2451, 3935.7437)	16.092
dIDP	713617	1408988	1072958	1161853	496548	651593	1	912360	1162976	1008191	1	483016	840196	887564	623838	873955	1	1	1	665707	CPD0-2231	CPD0-2231 [ C10 H11 N4 O10 P2, tgt=39.27, overall=39.27 ]			(393.98337, 794.08575)(415.02097, 950.2134)(427.0175, 2972.7676)(409.02365, 35431.87)(410.0269, 3526.907)(411.0434, 1689.73)	2.061
&alpha;-ethyl-L-glutamate	556733	414109	506594	498330	437722	393737	438737	419801	654222	617936	103579	445789	439496	507781	621589	419169	512040	403819	470602	363338	CPD0-2267	CPD0-2267 [ C7 H12 N O4, tgt=52.07, overall=52.07 ]			(174.0769, 1844.9)(175.8402, 1130.335)(157.07137, 31176.408)(158.07312, 5271.9717)(159.069, 3822.0513)(194.01775, 2404.9067)(176.1053, 4583.53)(198.0743, 8532.39)(182.3535, 1165.8344)	1.406
(<i>S</i>)-ureidoglycine	146111	290804	1399576	784494	291503	194632	389183	286374	1996750	165158	353613	433397	191392	4739608	443166	5177408	359479	328942	275966	258640	CPD0-2298	CPD0-2298 [ C3 H7 N3 O3, tgt=58.90, overall=58.90 ]			(137.05463, 350985.3)(116.23971, 1337.7715)(116.0353, 227.44)(135.7286, 25317.924)(137.06502, 4013.1433)(119.04958, 6179.96)(151.08054, 1115.3588)(136.20042, 14904.494)(137.0778, 1299.93)(157.29016, 2589.6929)(159.54306, 6556.9897)(138.87921, 7789.957)(141.5304, 3619.02)	1.41
5-fluorouridine	504919	244005	402865	377676	1	544913	1	380684	461901	477524	1	377778	550999	440649	427826	313978	1	1	1	278173	CPD0-2367	CPD0-2367 [ C9 H11 F N2 O6, tgt=58.69, overall=58.69 ]			(244.05168, 16997.018)(245.05391, 1973.0377)(289.05087, 2085.7085)	4.377
triethanolamine	26254626	11836365	9633430	8645519	8856723	6829010	18786290	10390008	10768666	21011428	15857551	31718372	24682888	10446080	36135036	9950208	21127522	14513131	17469548	10706473	CPD0-2459	CPD0-2459 [ C6 H16 N O3, tgt=93.16, overall=93.16 ]			(132.1027, 557725.4)(133.10574, 35693.785)(134.10739, 1512.3754)(170.6519, 3063.77)(176.1059, 3571.7)(160.10704, 6017.2173)	2.098
isoguanine	1490727	906747	1232972	1585685	1070797	1437804	1320323	1624651	1530825	988939	1209816	1204079	1371091	1972524	1570221	1521841	1343815	1502512	1117461	1574264	CPD0-2461	CPD0-2461 [ C5 H5 N5 O, tgt=63.63, overall=63.63 ]			(137.0464, 7453.966)(152.05794, 37058.434)(153.05864, 1550.1836)(134.44699, 31308.355)(170.08179, 12188.447)(171.08423, 785.46674)(155.62256, 1822.0891)(175.03731, 1171.4467)(159.27951, 5990.1416)(160.36661, 514.5234)	2.123
2-hydroxy-3-nitropropionate	172388	145536	151474	119015	93843	106032	149519	141111	181416	130229	122091	181069	201973	131718	171496	208409	129371	91769	93819	110741	CPD0-2489	CPD0-2489 [ C3 H4 N O5, tgt=21.64, overall=21.64 ]			(135.01355, 2227.2312)(139.0254, 6272.556)(156.0468, 4478.467)(158.00337, 10550.174)(159.00517, 728.00336)(139.17766, 1683.343)	1.41
fosmidomycin	223034	338827	248341	197636	226881	244993	936042	258667	282323	251615	786374	155741	162028	200034	244101	295768	947303	870550	985131	144256	CPD0-441	CPD0-441 [ C4 H9 N O5 P, tgt=57.05, overall=57.05 ]			(184.36372, 3072.9866)(167.60545, 10220.791)(168.0198, 2290.275)(184.28252, 4927.315)(185.36848, 1670.0566)(200.25533, 3072.359)(184.72101, 6853.2827)(184.04836, 762.145)(209.02591, 835.06506)(188.75423, 7833.854)(190.76282, 2391.0476)(192.0118, 1112.66)	2.3937
<i>N</i>-(4-aminobenzoyl)-L-glutamate	3484212	190143	2849238	2988998	1	2330490	1	175681	2653575	3565724	1	1992778	3271334	2952172	4163477	182554	358996	675899	404952	84652	CPD0-889	CPD0-889 [ C12 H12 N2 O5, tgt=52.46, overall=52.46 ]			(252.08752, 690.3667)(284.1106, 1800.64)(268.1047, 232685.58)(269.10733, 32042.098)(287.05646, 159657.8)(288.0595, 23989.041)(289.0616, 3169.2183)	5.40316
1,4-naphthoquinone	503421	533969	418973	480776	1	406813	152650	400151	541767	684691	4102225	203829	597762	119116	627338	103394	856981	3646349	3634217	294191	CPD0-954	CPD0-954 [ C10 H6 O2, tgt=47.22, overall=47.22 ]			(161.04521, 778.8217)(142.28316, 941.925)(161.29828, 920.49756)(143.15033, 1640.9456)(144.0452, 343.39502)(176.12985, 11427.213)(160.56772, 635.0617)(183.30951, 4674.549)(184.43518, 919.05994)(163.0161, 9707.811)	3.7645
hexanediol 1,6-bisphosphate	298376	544259	553206	603448	206047	415818	177123	447315	325737	310953	240988	417099	1260195	354241	941455	356510	173262	1	260056	534687	CPD0-967	CPD0-967 [ C6 H12 O8 P2, tgt=47.61, overall=47.61 ]			(299.00104, 291.622)(261.00858, 3708.663)(262.0108, 135.65)(294.03778, 195.65666)(276.3956, 25961.943)(277.50095, 41083.824)(278.4915, 6763.483)(279.0384, 10023.576)	1.9
4-isopropylbenzyl alcohol	703059	702948	502918	900207	575168	497621	1	461025	917564	1031556	217043	1034965	1028050	397752	1276752	412756	286168	1	511257	1	CPD-1002	CPD-1002 [ C10 H14 O, tgt=80.40, overall=80.40 ]			(151.11143, 1818.02)(151.11243, 2586.7837)(133.10176, 35301.03)(134.10504, 2956.0596)(159.09235, 3029.785)	7.277
(+)-carvone	703059	702948	502918	900207	575168	497621	1	461025	917564	1031556	217043	1034965	1028050	397752	1276752	412756	286168	1	511257	1	CPD-10037	CPD-10037 [ C10 H14 O, tgt=80.40, overall=80.40 ]			(151.11143, 1818.02)(151.11243, 2586.7837)(133.10176, 35301.03)(134.10504, 2956.0596)(159.09235, 3029.785)	7.277
(-)-<i>trans</i>-carveol	1	1	1	1	1	1	229731	1	1	1	860885	1	1	1	1	1	808100	511999	378333	1	CPD-10051	CPD-10051 [ C10H16O, tgt= ]			(154.12337, 2009.1102)(154.93439, 5674.166)(135.11728, 4199.998)(170.15446, 14655.7)(171.15775, 362.245)(180.12286, 38247.363)(159.70853, 12117.037)(161.11525, 812.2601)	18.461
afrormosin-7-O-glucoside	1055389	1	769964	582390	1	934322	378521	624394	814999	1107586	604947	459124	788743	1316160	1153791	1319740	446164	330577	635301	1	CPD-10077	CPD-10077 [ C23 H24 O10, tgt=47.31, overall=47.31 ]			(465.1512, 1298.76)(465.10358, 46977.746)(466.23187, 8168.5557)(467.10907, 1441.452)	6.892
3'-deoxyadenosine	1	1	1	1	1	1	205595	1	1	393945	1	315161	1	1	1	1	210949	1	153100	177071	CPD-10129	CPD-10129 [ C10H13N5O3, tgt= ]			(253.10538, 1593.395)(269.13635, 8398.545)(251.1247, 10334.49)(256.83337, 18914.965)(257.0816, 681.7)	6.07062
Fe(II)-nicotianamine	1370267	247455	263350	383848	182361	581597	494975	381364	330003	1483706	303825	888121	1525155	509163	2017335	512282	417709	454082	275601	309530	CPD-10157	CPD-10157 [ C12 H21 Fe N3 O6, tgt=10.49, overall=10.49 ]			(364.7226, 6877.6665)(339.06296, 4766.9985)(364.3489, 7280.8374)(364.27158, 24153.799)(381.08017, 340635.97)(383.08014, 28835.307)(365.5685, 427.89)	1.772
homofuraneol	1243809	909927	1271466	1502091	450011	1233011	847550	1126394	1034669	1637887	782776	2206960	1375867	938198	3296718	1336332	804736	691218	776110	578334	CPD-10201	CPD-10201 [ C7 H10 O3, tgt=54.99, overall=54.99 ]			(145.87236, 7605.282)(145.0678, 947.85)(164.10768, 2669.3079)(143.28824, 3562.787)(143.08224, 317.97998)(165.05528, 37513.56)(166.05838, 1822.9489)(147.04404, 25350.41)(148.04803, 2470.663)	3.966
norfuraneol	1	278001	315111	307451	265466	278047	1	242018	1	1	1	1	1	1	1	1	1	1	1	216178	CPD-10204	CPD-10204 [ C5 H6 O3, tgt=81.65, overall=81.65 ]			(119.05005, 1657.4232)(118.06548, 40385.957)(119.067, 1924.24)(137.02371, 12725.055)	4.242
4-hydroxy-5-methyl-2-methylene-3(2H)-furanone	3261128	3914605	3550844	3466047	3516468	3741334	3064258	3925308	3473239	3809930	4338063	1	3487955	3376375	1	3446583	2858981	1	3026602	3433775	CPD-10205	CPD-10205 [ C6 H6 O3, tgt=63.68, overall=63.68 ]			(127.04023, 40192.242)(128.04353, 179.89285)(109.029564, 16556.104)(149.02391, 80140.06)(150.02705, 5216.642)	14.4689
(2E)-2-ethylidene-4-hydroxy-5-methyl-3(2H)-furanone	1040929	672539	542169	664420	180041	4433520	5429819	261809	268644	1167855	3346331	262666	304746	1958960	1237508	11526049	4925478	911179	2789453	164069	CPD-10206	CPD-10206 [ C7 H8 O3, tgt=79.43, overall=79.43 ]			(140.0479, 247.48)(123.04483, 1719.3654)(161.42537, 1380.6499)(144.0814, 46455.4)(145.08452, 4605.9443)(163.0394, 42448.293)(164.1349, 3606.532)(165.0555, 199.66)	4.0922
(2E)-4-hydroxy-5-methyl-2-propylidene-3(2H)-furanone	373904	324324	332645	1	1	1	332818	1	420659	346424	548424	1	526484	201201	394134	345224	341218	1	1	210809	CPD-10207	CPD-10207 [ C8 H10 O3, tgt=91.21, overall=91.21 ]			(157.0711, 398.17)(138.05588, 700651.3)(139.05817, 53137.84)(140.06142, 4943.1665)(156.07697, 2676.9387)(138.26534, 9415.904)(176.1037, 1171.66)(154.0863, 3542.0598)(161.04498, 540.935)	2.077
(2E)-2-butylidene-4-hydroxy-5-methyl-3(2H)-furanone	2500835	2870293	2636267	2353984	1152621	2114684	3648701	1977074	2026652	3807606	4605961	2384700	2198920	1296869	1908011	2507161	2613806	4773410	2219454	1321851	CPD-10208	CPD-10208 [ C9 H12 O3, tgt=82.67, overall=82.67 ]			(170.0809, 196.04)(151.07593, 71127.49)(152.07845, 6503.875)(168.10147, 18082.896)(169.10516, 558.24335)(192.06664, 827.3333)(176.77036, 7263.6353)(177.07036, 8996.278)	2.753
2-butyl-4-hydroxy-5-methyl-3(2H)-furanone	474873	1	456786	546634	922500	1	1056581	1	647351	531388	962843	754268	688586	506199	611008	408417	957979	179958	187468	1	CPD-10209	CPD-10209 [ C9 H14 O3, tgt=36.30, overall=36.30 ]			(194.08757, 4906.9233)(189.1281, 6820.0547)(171.10019, 22170.072)(172.1031, 677.5933)(176.07133, 12678.993)	4.198
4-hydroxy-5-methyl-2-propyl-3(2H)-furanone	334396	286376	404673	439691	1108697	529477	244420	375374	148932	419892	817499	383470	349292	402249	735786	215882	291101	370786	294119	561639	CPD-10210	CPD-10210 [ C8 H12 O3, tgt=45.81, overall=45.81 ]			(156.69235, 13632.533)(158.08173, 7040.964)(139.73724, 2322.36)(140.0701, 2340.64)(157.08374, 10545.13)(158.0804, 1071.95)(141.58455, 2438.815)(143.08224, 176.65)(175.00436, 16236.176)(179.12616, 7250.37)(160.10783, 3941.53)(183.08345, 2495.91)(162.9354, 2401.2698)(166.07288, 3596.8516)	2.58175
furaneol (enol form)	675954	547984	745917	669944	564919	576064	665981	568427	133371	717158	648579	867391	699111	782771	760043	727905	646393	571182	529276	518306	CPD-10211	CPD-10211 [ C6 H8 O3, tgt=56.26, overall=56.26 ]			(130.04974, 5686.1816)(131.0532, 285.43)(111.047, 3088.96)(112.0507, 334.53)(151.03569, 44802.477)(152.03711, 7395.4385)(153.03427, 5692.3525)	1.406
mesifurane (enol form)	1	909927	1	1	450011	1	847550	1	1	1637887	782776	2206960	1	1	3296718	1	804736	691218	776110	1	CPD-10214	CPD-10214 [ C7H10O3, tgt= ]			(145.87236, 7605.282)(145.0678, 947.85)(164.10768, 2669.3079)(143.28824, 3562.787)(143.08224, 317.97998)(165.05528, 37513.56)(166.05838, 1822.9489)(147.04361, 8707.042)	2.117
furaneol glucopyranoside	171992	287220	1	1	1	118608	463826	124333	104545	1238695	1151066	1	317796	156713	4076059	148859	3200256	582631	819759	83683	CPD-10216	CPD-10216 [ C12 H18 O8, tgt=9.21, overall=9.21 ]			(291.09808, 29612.531)(293.10193, 12703.715)(293.76962, 8396.59)(273.0877, 6794.851)(274.0917, 985.865)(291.09894, 82676.26)(292.102, 12046.41)(293.1046, 3523.21)(290.1286, 12874.29)(313.855, 9723.264)(314.0835, 3894.19)	6.851
(4Z,7Z,10Z,13Z,16Z,19Z)-docosahexaenoate	1	1	218220	1	129131	1	237575	164694	1	1	328320	88834	160520	1	123432	214868	327864	624810	944384	1	CPD-10244	CPD-10244 [ C22 H31 O2, tgt=45.78, overall=45.78 ]			(327.23196, 4259.241)(309.22183, 3100.8376)(331.25397, 10451.678)(333.2589, 420.53)(310.2356, 1586.505)(311.2396, 114.92)(346.27148, 4454.07)(330.26324, 444.315)(350.2135, 9631.28)(351.2169, 475.42)(334.72458, 11047.531)(337.23337, 3518.8633)	16.6771
(9Z,12Z)-hexadeca-9,12-dienoyl-CoA	110182	103513	1	85470	1	133118	81998	120662	78883	153857	80137	118187	201817	188172	151895	1	102234	87076	88923	128939	CPD-10254	CPD-10254 [ C37 H58 N7 O17 P3 S, tgt=48.50, overall=48.50 ]			(980.27985, 4334.972)(981.2806, 3848.5566)(982.2792, 3490.3926)(983.27844, 1179.467)	29.023
5-pentadecatrienyl resorcinol	1	1	1	149977	1	1	130387	1	1	1	293459	184992	1	1	1	1	434953	197046	270062	1	CPD-10256	CPD-10256 [ C21 H30 O2, tgt= ]			(318.2408, 2277.65)(298.2144, 24032.398)(299.88916, 31816.74)(318.2394, 1977.09)(320.2562, 428030.12)(299.23053, 234756.39)(301.233, 79021.38)(302.23755, 7593.6797)(333.4654, 13492.648)(334.7649, 2722.7476)(337.2173, 11010.801)(338.22046, 1357.355)	17.694
5-pentadecatrienyl resorcinol-3-methyl ether	1	1	1	1	1	1	878034	1	1	1	2366449	1	1	1	1	1	1597546	1244211	1162580	1	CPD-10257	CPD-10257 [ C22H32O2, tgt= ]			(313.24985, 528.7867)(316.2607, 1215.065)(328.26144, 43335.242)(329.26447, 8464.734)	19.051
dihydrosorgoleone	108716	1	89338	1	1	1	217862	119676	117297	1	388479	1	1	1	167260	1	331518	1	1	1	CPD-10258	CPD-10258 [ C22 H32 O3, tgt=7.41, overall=7.41 ]			(370.22592, 705.2233)(327.23178, 4896.277)(344.22855, 6749.937)(364.26974, 1597.6567)(349.21716, 3327.2122)(344.9275, 2180.2434)	13.9815
sorgoleone	711321	369227	508646	731950	574957	540855	679258	446793	581115	600470	1	363202	1054174	601547	987848	845807	1028692	779952	1	771123	CPD-10259	CPD-10259 [ C22 H29 O4, tgt=58.34, overall=58.34 ]			(339.20377, 4498.0464)(375.30963, 17254.068)(376.25397, 3413.1091)(382.2013, 3246.6167)(383.20444, 1886.5673)	17.718
thalianol	1	1	1	1	1	1	159069	1	1	1	667508	1	1	1	1	1	1	523717	447982	1	CPD-10263	CPD-10263 [ C30H50O, tgt= ]			(427.39233, 3755.275)(428.3956, 1811.66)(409.38196, 4673.8525)(410.3849, 967.8)	23.404
decanoyl-CoA	121196	1	1	1	1	1	1	1	1	154203	1	1	1	1	75111	145682	1	1	1	1	CPD-10267	CPD-10267 [ C31 H50 N7 O17 P3 S, tgt=15.52, overall=15.52 ]			(919.25336, 8238.91)(920.2559, 2902.8533)(941.23456, 1481.0774)	8.063
palmitoleoyl-CoA	105553	92238	1	79763	1	120648	77992	119772	1	163408	1	106500	221296	208908	159972	1	91755	1	1	111003	CPD-10269	CPD-10269 [ C37 H60 N7 O17 P3 S, tgt=22.26, overall=22.26 ]			(981.2807, 4307.5527)(982.2793, 3964.06)(983.27844, 1221.3073)	29.014
<i>N</i>-hydroxy-L-isoleucine	1	443401	497638	1	1	1	1	1	1	516382	1	1	1	1	693175	1	1	1	1	1	CPD-10271	CPD-10271 [ C6 H12 N O3, tgt=55.72, overall=55.72 ]			(150.0907, 242.04)(151.05902, 23094.53)(152.0592, 1493.7334)	2.451
<i>N,N</i>-dihydroxy-L-isoleucine	1226280	8060914	9096060	9487964	8906619	217810	249283	8477842	216629	1174148	170517	271548	240055	181682	458519	192445	1159342	8003956	1109968	7257260	CPD-10272	CPD-10272 [ C6 H12 N O4, tgt=59.24, overall=59.24 ]			(163.07643, 34653.195)(164.07973, 2300.53)(145.8386, 1857.3876)(147.0806, 285.42)(167.11545, 1800.04)(185.06668, 228580.58)(186.07083, 42887.605)(187.06479, 76085.92)(170.64728, 1550.0406)(171.0642, 241.58)	5.3845
lotaustralin	424760	1391915	450924	474751	1749887	477509	372307	528384	433409	333785	343263	407057	485465	537496	487829	525949	412752	362341	344398	1650433	CPD-10277	CPD-10277 [ C11 H19 N O6, tgt=55.26, overall=55.26 ]			(247.12941, 1471.1628)(281.59332, 9072.346)(280.16183, 3744.0234)(261.1445, 203.42)(287.11105, 6057.4175)(289.1252, 210.64)(267.0984, 11277.657)(268.10544, 550482.2)(269.10797, 62211.523)(270.10855, 8400.125)	4.4521
docosanoyl-CoA	1	1	1	1	1	1	1	1	1	1	1	1	1	271366	1	1	1	1	1	1	CPD-10279	CPD-10279 [ C43 H74 N7 O17 P3 S, tgt= ]			(1090.3656, 14741.22)(1091.368, 999.97)	16.521
marneral	1	1	1	1	1	1	159069	1	1	1	667508	1	1	1	1	1	1	523717	447982	1	CPD-10285	CPD-10285 [ C30 H50 O, tgt= ]			(427.39233, 3755.275)(428.3956, 1811.66)(409.38196, 4673.8525)(410.3849, 967.8)	23.404
pyropheophorbide <i>a</i>	1617009	1	1323595	278628	1100640	960335	1	1057392	164229	1095425	618884	226248	1318609	1	546659	202423	735868	480698	596708	1527975	CPD-10296	CPD-10296 [ C33 H33 N4 O3, tgt=49.28, overall=49.28 ]			(534.8306, 17203.115)(537.0152, 21339.281)(538.0206, 6158.5527)(539.2652, 3811.335)(519.3534, 15047.1455)(520.2452, 3780.3184)(521.2472, 708.80597)(536.0645, 5475.5864)(536.85455, 20271.193)(538.07263, 6169.046)(538.2745, 2230.69)(522.2737, 7066.9297)(556.0948, 522.49005)(555.28455, 2623.7998)(533.53204, 11168.403)(535.2933, 5664.61)(558.0737, 18912.96)(559.7125, 8575.637)(560.9296, 2434.0566)(56…	7.2651
D-allothreonine	852594	616331	709446	623924	944903	396304	1341732	778799	534719	969902	1067305	241330	828787	372459	1689682	696134	937942	1058535	1091067	1035788	CPD-10303	CPD-10303 [ C4 H9 N O3, tgt=52.89, overall=52.89 ]			(121.06536, 136169.08)(122.31859, 8004.3364)(123.06913, 317.73666)(102.80313, 3888.0012)(120.18354, 22371.498)(122.0691, 14492.68)(123.070404, 435.90503)(102.05538, 3679.5288)(138.09161, 22020.188)(139.09476, 1184.9036)(143.05193, 1023.2582)(146.05965, 568.43)(124.08992, 13696.239)(125.03849, 562.5256)	1.861
arabidiol	1	1	1	1	1	1	190874	1	1	1	288062	1	1	1	1	1	106673	131820	179796	1	CPD-10307	CPD-10307 [ C30 H52 O2, tgt= ]			(467.385, 9267.689)(468.39062, 1694.29)	22.12
baruol	1	1	1	1	1	1	159069	1	1	1	667508	1	1	1	1	1	1	523717	447982	1	CPD-10308	CPD-10308 [ C30H50O, tgt= ]			(427.39233, 3755.275)(428.3956, 1811.66)(409.38196, 4673.8525)(410.3849, 967.8)	23.404
vernolate	1	1	1	1	1	1	1	1	1	1	559425	1	1	1	1	1	1	1	336472	1	CPD-10320	CPD-10320 [ C18H31O3, tgt= ]			(295.22705, 18924.164)(296.22974, 2511.795)(277.21664, 9556.64)(278.2195, 1139.41)	10.812
&alpha;-L-fucopyranose	2614902	1	2546118	2435025	1	2028990	2399819	2101865	3271770	2722404	2139143	2778887	2319518	2605909	3302872	2309069	2624399	2151371	2453117	1	CPD-10329	CPD-10329 [ C6 H12 O5, tgt=52.91, overall=52.91 ]			(166.07275, 544.885)(148.06136, 4241.61)(170.05125, 41223.14)(171.05327, 4071.912)(172.05972, 5956.753)	1.407
&alpha;-D-ribofuranose	1048929	6785845	847171	906393	987343	1010305	543032	879347	1043209	1264960	750668	794695	1099030	7412115	1326810	970556	623471	531872	412631	922006	CPD-10330	CPD-10330 [ C5 H10 O5, tgt=66.31, overall=66.31 ]			(151.85777, 54483.367)(152.80956, 3677.0923)(152.0581, 1224.31)(133.89182, 7813.951)(153.5686, 2538.3826)(133.55286, 2088.9988)(168.08765, 1724.17)(150.22757, 17697.045)(151.15779, 459.68387)(174.04584, 1177.4974)(157.84055, 3095.2559)	2.028
gibberellin<sub>44</sub> (open lactone form)	210989	487863	176567	242188	305634	193838	103089	228474	191343	203618	124788	137037	610664	556792	196017	205200	103081	88925	105974	193546	CPD-10332	CPD-10332 [ C20 H26 O6, tgt=56.62, overall=56.62 ]			(363.23135, 4030.6597)(363.16852, 1470.9655)(363.18478, 1254.8689)(380.885, 2920.0947)(365.3733, 1025.4833)(388.64435, 6226.69)(389.84155, 1986.5377)(390.1766, 867.4)(369.1502, 3232.9478)(370.9666, 6591.122)(371.1646, 7015.49)	7.316
isovitexin 7-O-glucoside	4440176	6809941	3463729	2587714	4930667	4133258	589646	2654316	8156281	4672419	837079	6000529	8963106	8752916	4907196	10988044	1072120	399057	1177489	3526187	CPD-10347	CPD-10347 [ C27 H30 O15, tgt=73.68, overall=73.68 ]			(595.16583, 47035.46)(596.1689, 12334.269)(597.1697, 7553.145)(598.1744, 1100.6)(595.1686, 133439.28)(596.1716, 35538.254)(597.1737, 8548.812)(598.1758, 747.87)(618.8978, 38831.45)(619.99255, 10725.811)(619.1528, 4677.9473)	7.46
isovitexin-7-O-glucosyl-2''O-rhamnoside	1	1	1	1	1	79764	1	1	1	1	1	1	1	1	1	1	1	1	1	1	CPD-10348	CPD-10348 [ C33H40O19, tgt= ]			(763.2793, 5029.36)(763.2068, 5656.06)	6.03936
capsiconiate	1447027	1058506	2234477	1580700	1208374	1108279	380282	1697157	1971746	1537726	1	1271509	3052483	1043209	1546129	481370	357638	548454	1	1694520	CPD-10356	CPD-10356 [ C20 H28 O4, tgt=72.67, overall=72.67 ]			(333.20386, 2959.1565)(334.2138, 11328.57)(333.33875, 4942.925)(315.19376, 63692.047)(316.19714, 10374.9795)(317.20078, 898.1425)(360.1983, 290.4)(337.1749, 297.81)	16.282
(+)-gallocatechin	222204	558320	329069	168949	371324	415697	474309	210140	1	679516	887936	1	1383111	141680	735583	454251	438032	358963	386376	746499	CPD-10358	CPD-10358 [ C15 H14 O7, tgt=64.40, overall=64.40 ]			(290.0763, 3751.98)(307.08258, 23307.127)(308.08353, 2467.8872)(290.53424, 2907.2056)(291.83386, 6485.345)(327.62347, 2203.02)(328.12564, 4762.6)(310.11456, 150.175)(330.26056, 1613.0391)(332.07648, 3899.25)	1.844
(<i>Z</i>)-[(4-hydroxyphenyl)acetaldehyde oxime]	564537	675880	4138888	1364790	481484	478543	199315	214363	5800485	771072	305814	306470	486600	4699393	792392	1677350	118336	305761	194707	668017	CPD-1041	CPD-1041 [ C8 H9 N O2, tgt=63.33, overall=63.33 ]			(151.92188, 8374.847)(156.0776, 1417.87)(134.78485, 4515.1777)(136.0635, 127153.02)(137.0651, 9072.7)(155.15482, 5653.1016)(153.0647, 855.54)(135.77654, 51967.41)(137.06499, 5928.4897)(174.11343, 2700.8054)(151.0821, 133.23)(175.06004, 2132.6367)(156.7826, 39759.824)(157.37508, 4856.433)(158.04129, 11181.641)	1.878
(-)-epigallocatechin	222204	558320	329069	168949	371324	415697	474309	210140	1	679516	887936	1	1383111	141680	735583	454251	438032	358963	386376	746499	CPD-10411	CPD-10411 [ C15 H14 O7, tgt=64.40, overall=64.40 ]			(290.0763, 3751.98)(307.08258, 23307.127)(308.08353, 2467.8872)(290.53424, 2907.2056)(291.83386, 6485.345)(327.62347, 2203.02)(328.12564, 4762.6)(310.11456, 150.175)(330.26056, 1613.0391)(332.07648, 3899.25)	1.842
(-)-epiafzelechin	372496	130428	1	268444	139879	160434	264240	191925	173446	129773	358205	195482	294557	224557	739263	194085	441774	236103	505667	234428	CPD-10413	CPD-10413 [ C15 H14 O5, tgt=47.50, overall=47.50 ]			(274.0835, 2792.322)(260.58685, 522.685)(261.09277, 1718.708)(293.83246, 1727.7422)(275.18182, 2057.7966)(276.10895, 4130.788)(297.07, 4499.324)(298.0662, 4040.9539)(299.06796, 403.325)(280.8207, 5866.5273)	1.794
dhurrin	157679	291768	278693	172295	180261	324480	260265	265150	412866	271233	207367	147450	228179	308221	237188	260822	230658	1	194832	179363	CPD-1042	CPD-1042 [ C14 H17 N O7, tgt=45.71, overall=45.71 ]			(297.3186, 30305.326)(294.1019, 1337.8)(317.12006, 2130.4673)(294.1042, 521.6)(331.13492, 873.385)(333.15228, 8118.966)(334.1547, 659.18)(315.141, 3545.3955)(339.10782, 13828.426)	4.62
2-hydroxylamino-4,6-dinitrotoluene-O-glucoside	102213	920644	429826	108507	187133	82911	1	1	83527	122796	1	260031	79536	158653	103233	186812	1	1	1	185602	CPD-10448	CPD-10448 [ C13 H17 N3 O10, tgt=55.98, overall=55.98 ]			(375.0799, 9238.54)(376.0742, 265.0)(379.8335, 23381.768)(380.10367, 5208.8945)(381.11642, 46788.137)(393.1166, 7291.12)(375.87247, 15910.601)(376.12744, 2508.985)(398.08792, 6861.6226)(383.0687, 2215.4639)	4.931
2-hydroxylamino-4,6-dinitrotoluene-C3-glucoside	102213	920644	429826	108507	187133	82911	1	1	83527	122796	1	260031	79536	158653	103233	186812	1	1	1	185602	CPD-10449	CPD-10449 [ C13 H17 N3 O10, tgt=55.98, overall=55.98 ]			(375.0799, 9238.54)(376.0742, 265.0)(379.8335, 23381.768)(380.10367, 5208.8945)(381.11642, 46788.137)(393.1166, 7291.12)(375.87247, 15910.601)(376.12744, 2508.985)(398.08792, 6861.6226)(383.0687, 2215.4639)	4.931
2-amino-4,6-dinitrotoluene	1	1	1	1	1	1	176493	1	1	1	162636	1	1	1	1	1	137774	113374	184372	1	CPD-10450	CPD-10450 [ C7 H8 N3 O4, tgt= ]			(200.05386, 5500.0986)(221.09268, 15099.292)(198.07465, 6987.868)(203.03305, 1931.9401)	2.969
2-amino-4,6-dinitrotoluene glucoside	1370267	1	266761	383848	182361	526560	232849	474143	330003	1483706	344887	888121	1525155	456502	1	516109	197464	236398	275601	1	CPD-10452	CPD-10452 [ C13 H17 N3 O9, tgt=46.76, overall=46.76 ]			(382.08353, 39282.27)(383.08063, 22608.67)(384.0833, 1590.578)(344.092, 3361.6533)(362.09552, 3840.63)(365.10583, 45594.984)(366.4139, 498.88)(367.07678, 487.015)	1.777
4-nitroso-2,6-dinitrotoluene	248993	139899	308256	133916	137446	226761	1	169481	272784	188519	1	117178	233745	452510	263411	177462	1	1	1	99635	CPD-10453	CPD-10453 [ C7 H5 N3 O5, tgt=50.15, overall=50.15 ]			(211.02441, 11352.313)(231.05461, 2333.5999)(212.18573, 1947.5599)(214.05019, 4130.803)	4.046
4-amino-2,6-dinitrotoluene	1	1	1	1	1	1	176493	1	1	1	162636	1	1	1	1	1	137774	113374	184372	1	CPD-10455	CPD-10455 [ C7 H8 N3 O4, tgt= ]			(200.05386, 5500.0986)(221.09268, 15099.292)(198.07465, 6987.868)(203.03305, 1931.9401)	2.969
4-amino-2,6-dinitrotoluene glucoside	1370267	154331	266761	383848	182361	526560	232849	474143	330003	1483706	344887	888121	1525155	456502	1	516109	197464	236398	275601	185954	CPD-10456	CPD-10456 [ C13 H17 N3 O9, tgt=46.76, overall=46.76 ]			(382.08353, 39282.27)(383.08063, 22608.67)(384.0833, 1590.578)(344.092, 3361.6533)(362.09552, 3840.63)(365.1094, 30817.172)(365.88153, 2388.7761)(367.07678, 487.015)	2.1031
4-hydroxylamino-2,6-dinitrotoluene	90029	1	1	1	1	1	1	1	99172	1	1	1	1	133449	104262	1	1	1	1	1	CPD-10457	CPD-10457 [ C7 H7 N3 O5, tgt=27.73, overall=27.73 ]			(214.05057, 6549.5205)(201.04436, 8453.692)	3.96
4-hydroxylamino-2,6-dinitrotoluene 3C-glucoside	102213	920644	429826	108507	187133	82911	1	1	83527	122796	1	260031	79536	158653	103233	186812	1	1	1	185602	CPD-10458	CPD-10458 [ C13 H17 N3 O10, tgt=55.98, overall=55.98 ]			(375.0799, 9238.54)(376.0742, 265.0)(379.8335, 23381.768)(380.10367, 5208.8945)(381.11642, 46788.137)(393.1166, 7291.12)(375.87247, 15910.601)(376.12744, 2508.985)(398.08792, 6861.6226)(383.0687, 2215.4639)	4.931
4-hydroxylamino-2,6-dinitrotoluene-O-glucoside	102213	920644	429826	108507	187133	82911	1	1	83527	122796	1	260031	79536	158653	103233	186812	1	1	1	185602	CPD-10460	CPD-10460 [ C13 H17 N3 O10, tgt=55.98, overall=55.98 ]			(375.0799, 9238.54)(376.0742, 265.0)(379.8335, 23381.768)(380.10367, 5208.8945)(381.11642, 46788.137)(393.1166, 7291.12)(375.87247, 15910.601)(376.12744, 2508.985)(398.08792, 6861.6226)(383.0687, 2215.4639)	4.931
2-hydroxy-4-(methylsulfanyl)butanoate	4095172	3855018	3745469	3557228	155051	1	851992	4143233	3938849	4036949	4395284	4008276	3703182	3094706	3966413	3716604	3805113	755473	3857994	153597	CPD-10468	CPD-10468 [ C5 H9 O3 S, tgt=54.53, overall=54.53 ]			(149.02423, 98887.73)(150.0274, 6181.802)(151.03516, 1034.265)(153.0383, 1547.23)(132.0213, 1059.0299)(168.06308, 741.27246)(150.0574, 9021.75)(174.51529, 14720.114)(176.34828, 12748.391)(177.02345, 20392.2)(154.0028, 22804.93)	14.478
dimethylsulfonio-2-hydroxybutanoate	6025962	918086	2051440	1934831	788455	1604648	5092690	2167698	2215468	6375066	3262628	9888406	6278334	1092769	13766040	2110914	4420654	3435827	4063228	1053717	CPD-10470	CPD-10470 [ C6 H12 O3 S, tgt=70.60, overall=70.60 ]			(165.45317, 7631.397)(167.71814, 2966.32)(168.55115, 4134.0)(147.0426, 3916.9778)(148.04, 149.49)(165.05557, 33465.902)(166.05568, 1513.0349)(147.04378, 5996.565)(148.0394, 115.75)(182.08191, 83819.77)(183.08502, 7129.3843)(184.08554, 874.562)(164.07434, 7146.2266)(189.03978, 9379.558)(191.0412, 1437.3679)(171.02734, 30608.152)(172.02989, 2416.91)	2.111
dimethylsulfoniopropanoate-amine	2117658	2989694	701195	760714	653975	639007	2199304	693955	925680	2318387	2126950	1997632	2153611	577723	2320170	730279	1586056	1477218	1776118	2413906	CPD-10471	CPD-10471 [ C5 H15 N S, tgt=76.54, overall=76.54 ]			(144.08139, 73320.75)(145.0845, 7069.8594)	4.23
3-dimethylsulfoniopropionaldehyde	569817	165646	203260	171842	191967	186456	379810	203155	226890	589970	343459	642959	552034	256767	1142595	212775	363264	263161	411092	206684	CPD-10472	CPD-10472 [ C5 H11 O S, tgt=46.50, overall=46.50 ]			(119.24986, 7898.112)(120.0544, 833.85)(102.61431, 2240.0686)(103.0392, 3005.21)(121.065575, 1721390.0)(102.10722, 3322.4695)(138.09209, 235508.12)(142.08656, 1894.6808)(123.07108, 8071.545)(124.0757, 1365.73)(146.9381, 4704.3003)(147.0439, 4472.505)(128.02641, 369.8)	2.127
peonidin 3-O-glucoside	1	1	1	1	1	1	1	1	1	1	1	1	1	1	1	267398	1	1	1	1	CPD-10501	CPD-10501 [ C22H23O11, tgt= ]			(481.1704, 13878.37)(482.1735, 1366.08)	6.539
peonidin 3,5-diglucoside	708345	298786	521123	304127	283525	610905	557768	284206	720660	895196	962955	324858	560345	1327265	1107541	828492	611380	549870	1058726	602059	CPD-10502	CPD-10502 [ C28 H33 O16, tgt=73.18, overall=73.18 ]			(626.9837, 13472.336)(626.1806, 4430.1704)(627.18475, 1009.59326)(611.16144, 349302.84)(612.1645, 98173.71)(613.16644, 22029.166)(648.16284, 2976.5466)(630.1368, 55896.99)(631.1394, 13705.31)	7.623
peonidin-3-(p-coumaroyl)-rutinoside-5-glucoside	121196	1	1	1	1	1	1	1	1	154203	1	1	1	1	75111	145682	1	1	1	1	CPD-10504	CPD-10504 [ C43 H49 O22, tgt=17.16, overall=17.16 ]			(919.25275, 7861.5)(920.2559, 2902.8533)(919.2552, 9371.14)(920.2583, 3620.86)(941.2365, 1679.72)	8.063
4-(indol-3-yl)butanoate	749818	377391	220950	185358	396817	279634	344849	379052	694463	458192	579032	552963	383945	1106751	419270	125433	809964	189638	315500	365786	CPD-10507	CPD-10507 [ C12 H12 N O2, tgt=54.36, overall=54.36 ]			(205.25916, 4322.8066)(184.53673, 7970.6855)(206.10251, 6121.1943)(188.09222, 8600.509)(220.11873, 14324.943)(221.1222, 918.36993)(202.10837, 621.76)(225.74504, 4851.049)(207.0661, 12875.874)(208.06937, 719.8925)	2.8101
indole-3-butyryl-CoA	384707	305494	283832	232672	309462	355889	103978	247768	309589	381773	245742	1	311907	420438	400292	1	137840	98292	280442	117051	CPD-10508	CPD-10508 [ C33 H47 N8 O17 P3 S, tgt=13.63, overall=13.63 ]			(935.2133, 13255.032)(936.2161, 6248.335)	6.89
3,7,4'-trimethylquercetin	259185	313026	151173	146674	246947	313838	284341	223007	303071	131852	271657	1	229810	276991	183953	1	147613	160689	321303	1	CPD-10510	CPD-10510 [ C18 H16 O7, tgt=28.70, overall=28.70 ]			(344.09113, 6728.554)(349.1034, 10147.04)(332.09116, 2031.7799)(365.1303, 458.68)(367.0732, 226.99)(349.9402, 5917.902)(351.97452, 1750.1257)(353.0824, 6749.375)	1.91
hexadecanedioate	361808	145489	173025	125887	117024	281843	175180	192314	188481	488689	215854	202917	374833	374779	537695	301391	463829	174619	294374	153746	CPD-10511	CPD-10511 [ C16 H28 O4, tgt=72.68, overall=72.68 ]			(302.23285, 8250.731)(303.23657, 909.07)(284.22235, 4216.282)(291.1839, 1076.56)	5.697
9,10-epoxystearate	1	1	397003	273833	244406	1	1	303463	306508	1	1513039	1	349929	201406	194109	1	2725258	1550685	1766577	340420	CPD-10514	CPD-10514 [ C18 H33 O3, tgt=72.44, overall=72.44 ]			(279.23242, 15278.031)(280.2356, 1291.8108)(297.2621, 21423.082)(298.2738, 1478.8201)(324.23596, 348.84497)(306.48227, 7831.1636)(306.99246, 6772.032)(307.2436, 2828.35)	16.171
(9R,10S)-dihydroxystearate	1	1	1	1	1	1	405499	1	1	1	915696	1	1	1	1	1	677417	521635	564795	1	CPD-10515	CPD-10515 [ C18 H35 O4, tgt=52.31, overall=52.31 ]			(316.2622, 946.58)(316.2607, 1426.43)(301.25345, 56132.613)(318.2762, 119.3)(320.23492, 15436.341)(321.23837, 1494.196)	19.366
indole-3-acetyl-CoA	1	1	1	1	1	162068	1310303	1	1	1	895345	1	1	1	1	548821	586448	549370	1215834	1	CPD-10519	CPD-10519 [ C31 H51 N8 O17 P3 S, tgt= ]			(933.26825, 17705.121)(934.2713, 7262.3735)(935.27277, 2421.3132)	6.538
3,7,3'-trimethylquercetagetin	299960	1	359188	427388	1	333738	165251	296027	1	417071	241150	692218	409160	360150	309930	382753	156809	312284	431471	1	CPD-10520	CPD-10520 [ C18 H16 O8, tgt=47.81, overall=47.81 ]			(362.29242, 13250.071)(362.64114, 4896.902)(365.1036, 13389.71)(344.09128, 2875.9934)(360.1057, 394.9)(383.0804, 18666.664)(384.08398, 2902.27)(367.0756, 341.90665)	3.83176
<i>cis</i>-indole-2,3-dihydrodiol	564537	675880	4138888	1364790	481484	478543	199315	214363	5800485	771072	305814	306470	486600	4699393	792392	1677350	118336	305761	194707	668017	CPD-10523	CPD-10523 [ C8 H9 N O2, tgt=63.33, overall=63.33 ]			(151.92188, 8374.847)(156.0776, 1417.87)(134.78485, 4515.1777)(136.0635, 127153.02)(137.0651, 9072.7)(155.15482, 5653.1016)(153.0647, 855.54)(135.77654, 51967.41)(137.06499, 5928.4897)(174.11343, 2700.8054)(151.0821, 133.23)(175.06004, 2132.6367)(156.7826, 39759.824)(157.37508, 4856.433)(158.04129, 11181.641)	1.878
indigo	1	1	1	1	1	1	371823	1	1	1	392759	1	1	1	1	1	1	1	380781	1	CPD-10525	CPD-10525 [ C16H10N2O2, tgt= ]			(266.09152, 506.64)	10.5366
3-O-&beta;-D-glucoside digitoxigenin	3961151	3004447	5022295	3728313	2260078	3611139	2729965	2689974	3587816	5154877	1401023	5815292	7232883	5377436	7949997	2491259	2255500	1160398	1564659	4108614	CPD-10536	CPD-10536 [ C29 H44 O9, tgt=78.70, overall=78.70 ]			(537.30444, 97804.88)(538.3074, 25799.26)(539.35925, 3809.1392)(540.3054, 1135.2241)	15.708
digitoxigenin	711321	369227	509887	732942	558575	538153	1	447495	582265	600730	1	177396	1038536	602407	988085	820074	1	1	1	766507	CPD-10537	CPD-10537 [ C23 H34 O4, tgt=62.86, overall=62.86 ]			(375.25113, 22498.139)(376.25436, 3657.2532)(375.24872, 20904.426)(376.25214, 2845.245)(397.29276, 639.955)(375.2692, 8330.23)(376.272, 562.08)	17.8232
digiproside	1033659	1	1529106	970553	1	1806469	1	1880702	1152860	1479056	171679	718218	984016	2172814	1420805	1190230	315882	109529	1319403	1	CPD-10538	CPD-10538 [ C29 H44 O8, tgt=44.40, overall=44.40 ]			(520.3411, 65605.56)(521.3438, 17057.762)(522.3466, 1723.6958)(526.0929, 7961.7656)(526.2895, 2733.7734)	13.8878
glucodigifucoside	169191	1032950	1	314690	601136	107627	325352	121872	179728	1237322	243850	403445	570020	222974	410186	219539	228695	1	241984	152781	CPD-10539	CPD-10539 [ C35 H54 O13, tgt=21.78, overall=21.78 ]			(686.6046, 8458.183)(688.36066, 2301.6467)(665.352, 676.40497)(687.356, 10275.75)(688.3591, 1584.16)(701.3924, 9133.713)(702.39545, 2412.163)(688.32294, 14714.753)(689.32947, 4195.025)(689.3353, 165.62)	17.3497
digitoxigenin 3-O-&beta;-D-quinovoside	1	1	1	1	1	1	1	1	1	1	171679	1	1	1	1	1	315882	109529	1	1	CPD-10540	CPD-10540 [ C29H44O8, tgt= ]			(525.2857, 12148.017)(526.2895, 2733.7734)	8.17
UDP-fucose	104649	1	1	124324	211961	85638	1	1	1	100070	1	1	191313	1	116661	207966	1	1	1	179534	CPD-10542	CPD-10542 [ C15 H22 N2 O16 P2, tgt=47.16, overall=47.16 ]			(549.7188, 11622.415)(550.2967, 12750.898)(551.04755, 1465.8634)(549.0642, 7990.805)(534.05347, 20182.71)(536.03986, 5760.996)	20.059
methyl (indol-3-yl)acetate	4176016	82144	156077	99152	110899	191600	123508	122698	1748901	3730154	105199	3946078	4277108	436828	4550991	105888	3138128	114393	3496818	83685	CPD-10546	CPD-10546 [ C11 H11 N O2, tgt=46.41, overall=46.41 ]			(189.19597, 73220.3)(190.07759, 11706.994)(171.06526, 2440.9578)(190.08693, 8902.687)(191.0876, 278.39)(176.0912, 1642.44)(207.1135, 3365.352)(194.11809, 5811.0337)(213.07527, 1484.8699)	3.21195
terbinafine	2344034	295554	3376126	2530495	1928379	1691445	486691	2624629	3123154	2380627	641473	2049851	4953000	1542774	2567507	864893	749926	1002598	468161	2654723	CPD-10571	CPD-10571 [ C21 H26 N, tgt=67.93, overall=67.93 ]			(293.21176, 41070.55)(294.21445, 6414.1377)(295.2179, 987.59)(315.19385, 61577.066)(316.1972, 10002.109)(317.20078, 859.01245)	15.3655
5-(methylsulfanyl)-ribulose 1-phosphate	171912	3398893	138584	132692	1	134299	1	168699	115124	104589	1	151462	199235	96760	248580	175778	1	1	1	3235225	CPD-1063	CPD-1063 [ C6 H11 O7 P S, tgt=26.62, overall=26.62 ]			(259.9941, 1034.74)(244.38562, 630.25)(244.99025, 468.76)(259.4547, 2329.4377)(244.99304, 783.71796)(260.01343, 1103.5625)(281.98944, 409.56)(267.974, 562.841)	1.393
3-chlorobenzaldehyde	751291	1	458564	1691558	1	1	4714933	760964	4069061	866224	4950727	3305434	1	1	827775	805230	3544154	1516729	1993128	1	CPD-10660	CPD-10660 [ C7 H5 Cl O, tgt=58.72, overall=58.72 ]			(143.00233, 79607.45)(144.00233, 2960.9758)(146.0145, 150.785)(145.01418, 456.73666)(130.0165, 609.7)(162.03682, 19388.105)(163.37444, 77880.26)(164.043, 9653.73)(165.0452, 118.45)(140.0254, 1635.96)(167.99951, 2446.54)	4.42041
taraxerol	1	1	1	1	1	1	159069	1	1	1	667508	1	1	1	1	1	1	523717	447982	1	CPD-10667	CPD-10667 [ C30H50O, tgt= ]			(427.39233, 3755.275)(428.3956, 1811.66)(409.38196, 4673.8525)(410.3849, 967.8)	23.404
avenacin A-1	2044796	200285	1711193	1406276	1423303	310610	916399	1257422	310629	1967781	221143	1324267	300304	327467	349530	1414483	887573	743938	258401	207623	CPD-10678	CPD-10678 [ C55 H83 N O21, tgt=70.54, overall=70.54 ]			(1075.533, 9727.206)(1076.538, 3382.0012)(1077.5428, 967.32874)(1094.1521, 29027.56)(1094.5698, 10049.309)(1095.5721, 1864.5388)(1119.5254, 572.14)(1105.0977, 2715.3792)(1105.5469, 5199.975)	8.963
(8<i>E</i>)-4-hydroxy-sphing-8-enine	3056195	874531	1925013	1	1263666	2712287	6528799	1567395	1	2249097	15017091	2083947	1805756	3103746	3426007	1288425	12547714	6953362	8982706	1135227	CPD-10693	CPD-10693 [ C18 H38 N O3, tgt=94.75, overall=94.75 ]			(316.28543, 81964.11)(317.28845, 13957.879)(318.29153, 1118.195)(298.27472, 41282.613)(299.27744, 18123.78)(300.28757, 1400.1875)(339.2704, 3269.622)(321.2596, 61413.367)(322.2657, 7561.1377)	15.7612
<i>cis</i>-muurola-3,5-diene	1	1	1	1	1	1	269657	1	1	1	1	1	1	1	1	1	264913	1	598743	1	CPD-10707	CPD-10707 [ C15H24, tgt= ]			(227.17622, 23189.447)(228.17937, 1921.4366)	7.853
<i>cis</i>-muurola-4(14),5-diene	1	1	1	1	1	1	269657	1	1	1	1	1	1	1	1	1	264913	1	598743	1	CPD-10708	CPD-10708 [ C15H24, tgt= ]			(227.17622, 23189.447)(228.17937, 1921.4366)	7.853
3-deoxy-D-<i>glycero</i>-D-<i>galacto</i>-non-2-ulopyranosonate	613578	609162	413587	544801	359660	355281	438869	481069	493921	813447	284841	469234	568971	362924	558009	422838	459052	268529	289861	371498	CPD-10734	CPD-10734 [ C9 H15 O9, tgt=22.32, overall=22.32 ]			(270.0846, 235.47)(285.40375, 2126.3293)(267.09814, 17510.229)(273.3559, 2159.0322)	2.229
(4-hydroxyphenyl)acetonitrile	1	1	1	1	878332	1	2495414	2479574	1	1	625925	2701322	1	1	1	1	495451	2239237	1	1	CPD-1074	CPD-1074 [ C8H7NO, tgt= ]			(133.0513, 12147.155)(115.04066, 41417.527)(160.0559, 134.51)	8.632
(Z) &gamma;-bisabolene	1	1	1	1	1	1	269657	1	1	1	1	1	1	1	1	1	264913	1	598743	1	CPD-10758	CPD-10758 [ C15H24, tgt= ]			(227.17622, 23189.447)(228.17937, 1921.4366)	7.853
(-)-&alpha;-bisabolol	1	1	1	1	1	1	1111171	1	1	1	2110130	1	1	1	1	1	2466537	1362949	1	1	CPD-10759	CPD-10759 [ C15H26O, tgt= ]			(226.2163, 1376.06)(240.23257, 45655.484)(241.23567, 5914.457)(249.20569, 1293.3575)	17.079
3-hydroxycinnamate	1	1	1	1	1	1	20344014	1	1	1	17771124	1	1	1	1	13168024	14703764	7631078	15806401	1	CPD-10797	CPD-10797 [ C9H7O3, tgt= ]			(163.03983, 189982.89)(164.04301, 16786.4)(165.0487, 444.18668)(145.0284, 79.09)(147.04317, 2691.16)(167.071, 331.85)(189.0398, 115.48)	3.599
5-amino-6-(5-phospho-D-ribitylamino)uracil	1192806	520601	265140	344175	628041	203754	773659	333187	569373	1751501	406231	854596	974195	105690	1151754	220962	209218	365369	454013	396895	CPD-1086	CPD-1086 [ C9 H15 N4 O9 P, tgt=4.28, overall=4.28 ]			(339.06165, 5272.329)(337.21378, 21021.88)(338.21475, 5599.8896)(339.06207, 1386.2825)(375.43344, 621.0533)(377.05087, 1550.2441)(361.93665, 1450.5522)	1.677
(-)-carvone	703059	702948	502918	900207	575168	497621	1	461025	917564	1031556	217043	1034965	1028050	397752	1276752	412756	286168	1	511257	1	CPD-1089	CPD-1089 [ C10 H14 O, tgt=80.40, overall=80.40 ]			(151.11143, 1818.02)(151.11243, 2586.7837)(133.10176, 35301.03)(134.10504, 2956.0596)(159.09235, 3029.785)	7.277
quercetin 3, 4', 7-trisulfate	1	222423	237002	328451	464727	259577	1	160922	221553	1	1	206630	1	261705	1	500979	1	1	1	1	CPD-10893	CPD-10893 [ C15H7O16S3, tgt= ]			(521.8695, 833.43)(540.90405, 13124.402)(541.90735, 1534.9066)(543.883, 941.72)(521.871, 1098.83)(562.9171, 11224.646)(563.9204, 1342.345)(540.9032, 12185.53)(541.9064, 1362.12)	20.59
(-)-isopiperitenone	703059	702948	502918	900207	575168	497621	1	461025	917564	1031556	217043	1034965	1028050	397752	1276752	412756	286168	1	511257	1	CPD-1090	CPD-1090 [ C10 H14 O, tgt=80.40, overall=80.40 ]			(151.11143, 1818.02)(151.11243, 2586.7837)(133.10176, 35301.03)(134.10504, 2956.0596)(159.09235, 3029.785)	7.277
(<i>S</i>)-ureidoglycolate	591676	443401	497701	558948	408334	496985	269451	561971	572073	526836	135090	408149	469374	515067	688865	483789	275524	292390	220016	234879	CPD-1091	CPD-1091 [ C3 H5 N2 O4, tgt=43.74, overall=43.74 ]			(116.0164, 280.73)(119.02954, 8047.029)(151.05919, 18404.719)(152.05936, 1167.5221)(138.0555, 54060.55)(138.85025, 3539.5664)	2.4504
raffinose	384713	1	341997	328255	1	326107	776759	292776	373906	788041	787846	1	349180	1	355234	363190	841574	749984	829199	1	CPD-1099	CPD-1099 [ C18 H32 O16, tgt=16.90, overall=16.90 ]			(487.16998, 16244.691)(488.17377, 943.66003)	8.617
salicylate	478591	396765	513577	451548	299144	348036	317121	355697	255272	279203	295138	560010	523584	485287	514382	437372	334864	260498	271413	309571	CPD-110	CPD-110 [ C7 H5 O3, tgt=63.43, overall=63.43 ]			(138.1335, 18287.756)(139.03122, 6658.023)(140.0275, 4109.11)(123.9245, 2957.9883)(139.035, 2125.19)(140.0354, 1560.66)(159.06903, 4391.6973)(139.75537, 45279.543)(141.05754, 9824.917)(143.0526, 187156.25)(144.05568, 9343.726)(145.0128, 2474.4993)	1.419
1-<i>O</i>-(indol-3-ylacetyl)-&beta;-D-glucose	1	1	1	1	1	1	607133	1	1	1	415949	1	1	1	1	1	394872	345793	453189	1	CPD-1102	CPD-1102 [ C16 H19 N O7, tgt= ]			(343.13632, 11202.268)(357.1516, 8758.83)	8.85185
taxiphyllin	157679	291768	1	1	1	1	260265	1	1	271233	207367	1	228179	308221	237188	1	230658	1	194832	1	CPD-1103	CPD-1103 [ C14 H17 N O7, tgt=45.71, overall=45.71 ]			(297.54224, 55931.305)(294.1019, 1337.8)(317.12006, 2130.4673)(294.1042, 521.6)(331.13492, 873.385)(333.15228, 8118.966)(334.1547, 659.18)(315.141, 3545.3955)	3.576
D-<i>myo</i>-inositol 1,3,4,5,6-pentakisphosphate	160764	197608	143609	178581	255807	1	1	128347	1	1	207958	1	1	1	1	158658	129819	1	1	1	CPD-1107	CPD-1107 [ C6 H7 O21 P5, tgt=12.19, overall=12.19 ]			(594.01746, 2301.2866)(595.0232, 7852.894)(595.80286, 955.095)	8.612
(indol-3-yl)acetyl-glycine	1	1	1	1	1	1	170706	1	1	1	1	1	1	1	1	1	229247	1	1	1	CPD-11226	CPD-11226 [ C12 H11 N2 O3, tgt= ]			(236.0922, 1181.85)	3.6975
(indol-3-yl)acetyl-L-isoleucine	1	1	1	1	1	1	206328	1	1	1	129606	1	1	1	1	1	206235	111171	153100	1	CPD-11227	CPD-11227 [ C16 H19 N2 O3, tgt=47.62, overall=47.62 ]			(269.1357, 7140.2095)(307.1766, 1544.5801)(290.3693, 1378.8562)(291.17468, 2802.8)	5.022
(indol-3-yl)acetyl-L-methionine	128857	381530	1	1	1	1	1	1	348273	277617	1	274192	147253	1	1	1	1	1	1	1	CPD-11228	CPD-11228 [ C15 H17 N2 O3 S, tgt=12.07, overall=12.07 ]			(305.0998, 12881.615)(306.1112, 9680.9)(307.1105, 1699.28)(289.0931, 4825.39)(331.07935, 2184.8699)	3.33425
(indol-3-yl)acetyl-L-tyrosine	1	1	1	1	1	1	2703424	1	1	1	2644913	1	1	1	1	1	465926	1781893	501417	1	CPD-11229	CPD-11229 [ C19 H17 N2 O4, tgt= ]			(319.117, 469.9)(340.13315, 50663.566)(339.13287, 5105.143)(340.12775, 369.945)(357.7596, 11111.686)(359.16684, 771.43335)(346.11642, 640.4633)	8.85045
(indol-3-yl)acetyl-L-tryptophan	366555	715329	304297	421723	1	395492	339790	267271	375596	659303	124445	1549984	473324	471014	421906	242295	136379	1	111132	1	CPD-11230	CPD-11230 [ C21 H18 N3 O3, tgt=47.51, overall=47.51 ]			(364.13724, 863.1033)(346.21002, 6291.888)(344.1351, 5456.09)(345.1406, 618.24)(361.14194, 7187.715)(344.8939, 922.06)(362.41278, 1006.10254)(383.12958, 15219.671)(384.13446, 2404.9658)(366.82773, 7357.544)(366.1085, 1702.89)	3.93712
(indol-3-yl)acetyl-L-proline	1	1	1	1	1	1	1	1	1	1	1	227211	1	1	1	1	1	1	1	1	CPD-11231	CPD-11231 [ C15 H15 N2 O3, tgt= ]			(259.1165, 4017.58)(298.1148, 17833.88)	13.7213
(-)-jasmonoyl-L-isoleucine	1	1	1	1	1	1	1	1	1	1	1	1	1	1	1	1	191660	1	187942	1	CPD-11232	CPD-11232 [ C18 H28 N O4, tgt=47.25, overall=47.25 ]			(309.2049, 3407.1)(322.22375, 7495.855)	17.905
(-)-jasmonoyl-L-valine	1	1	1	304672	1	1	1	1	298667	299361	1	1	378173	304396	1	346140	402262	185156	299653	1	CPD-11233	CPD-11233 [ C17 H26 N O4, tgt=13.74, overall=13.74 ]			(308.18005, 4159.1196)(309.2046, 13339.597)(310.20798, 603.5617)(331.17294, 7343.6934)	13.8129
(-)-jasmonoyl-L-phenylalanine	1008901	478664	616912	243232	364790	92527	363606	871354	596269	502780	341806	423227	966086	1082608	170827	485202	500167	361350	367014	707939	CPD-11235	CPD-11235 [ C21 H26 N O4, tgt=71.84, overall=71.84 ]			(356.30295, 7250.4873)(358.1891, 2923.84)(339.17865, 42171.938)(340.18182, 5993.984)(357.1873, 6794.827)(358.18045, 2035.666)(339.17993, 54691.586)(340.18298, 8130.75)(363.28137, 635.12555)(364.1728, 1963.5076)	8.4912
(R)-amygdalin	8306572	3628954	7231359	7494690	7281482	6987091	12095078	7672910	7668010	8464198	11820203	7471152	7354409	8137708	3675948	7603920	11812427	11074634	11981452	3627604	CPD-1125	CPD-1125 [ C20 H27 N O11, tgt=92.02, overall=92.02 ]			(457.1578, 168420.06)(458.16074, 28361.121)(459.16245, 5739.9517)(460.1809, 292.65)(441.162, 124.43)(441.1667, 409.54)(480.4511, 779.1)(480.87036, 4490.1265)(481.2066, 2253.45)	8.948
<i>trans</i>-tuberonic acid	1	1	1	1	1	1	171466	1	1	1	167661	1	1	1	1	1	125394	1	136158	1	CPD-11253	CPD-11253 [ C12 H17 O4, tgt= ]			(207.10345, 8437.958)(253.11865, 1526.3325)	4.209
<i>cis</i>-tuberonic acid	1	1	1	1	1	1	171466	1	1	1	167661	1	1	1	1	1	125394	1	136158	1	CPD-11260	CPD-11260 [ C12 H17 O4, tgt= ]			(207.10345, 8437.958)(253.11865, 1526.3325)	4.209
<i>S</i>-sulfanylglutathione	457723	256993	97228	105240	320636	1	1	228809	331256	687748	241727	322097	412622	1	536933	1	1	173435	319241	183991	CPD-11281	CPD-11281 [ C10 H16 N3 O6 S2, tgt=36.58, overall=36.58 ]			(323.43683, 1356.86)(339.06268, 5591.5913)(322.24835, 4010.3052)(323.24225, 1225.292)(338.065, 7164.3496)(339.06067, 2178.2834)(363.949, 819.5082)(365.0346, 1943.5825)(349.02563, 13760.716)	1.661
(+)-<i>endo</i>-&beta;-bergamotene	1	1	1	1	1	1	269657	1	1	1	1	1	1	1	1	1	264913	1	598743	1	CPD-11287	CPD-11287 [ C15H24, tgt= ]			(227.17622, 23189.447)(228.17937, 1921.4366)	7.853
(2Z,6Z)-farnesyl diphosphate	686829	361769	573730	569896	180061	606551	260589	345036	692547	1130323	1	879013	556039	153912	740504	596375	289170	1	199205	415841	CPD-11293	CPD-11293 [ C15 H25 O7 P2, tgt=42.18, overall=42.18 ]			(379.1002, 25916.326)(380.10385, 4251.475)(365.10278, 3147.8284)(381.11566, 29158.13)(382.11884, 4078.207)(383.11624, 707.195)(365.1196, 1102.55)(397.13773, 15788.624)(398.1412, 2007.0801)(379.13614, 18788.238)(380.13992, 5402.32)	6.6255
2-formylbenzoate	4095172	3925700	3745469	3563126	3719048	1	5158366	4154566	3938849	4036949	4601241	3769505	3746031	1	3966413	3716604	3805113	1	3857994	3642802	CPD-1131	CPD-1131 [ C8 H5 O3, tgt=80.23, overall=80.23 ]			(149.02406, 102203.19)(150.02724, 6517.293)	17.618
(+)-&alpha;-santalene	1	1	1	1	1	1	269657	1	1	1	1	1	1	1	1	1	264913	1	598743	1	CPD-11377	CPD-11377 [ C15H24, tgt= ]			(227.17622, 23189.447)(228.17937, 1921.4366)	7.853
(-)-&beta;-santalene	1	1	1	1	1	1	269657	1	1	1	1	1	1	1	1	1	264913	1	598743	1	CPD-11378	CPD-11378 [ C15H24, tgt= ]			(227.17622, 23189.447)(228.17937, 1921.4366)	7.853
(-)-&beta;-curcumene	1	1	1	1	1	1	269657	1	1	1	1	1	1	1	1	1	264913	1	598743	1	CPD-11392	CPD-11392 [ C15H24, tgt= ]			(227.17622, 23189.447)(228.17937, 1921.4366)	7.853
&gamma;-curcumene	1	1	1	1	1	1	269657	1	1	1	1	1	1	1	1	1	264913	1	598743	1	CPD-11393	CPD-11393 [ C15H24, tgt= ]			(227.17622, 23189.447)(228.17937, 1921.4366)	7.853
diphosphoglycolyl proline	108740	1	138042	1	136929	217216	251780	1	314451	188510	361678	1	141651	153406	1	162617	259024	306475	395389	110926	CPD-11394	CPD-11394 [ C7 H9 N O10 P2, tgt=8.59, overall=8.59 ]			(328.97653, 9155.532)(329.97824, 1027.4026)(330.9749, 1179.4371)(330.97534, 304.39502)(313.31155, 1466.2115)(314.9809, 823.81995)(351.02008, 3198.4856)(337.9592, 678.1337)(338.9682, 241.95)	1.655
(-)-patchoulol	1	1	1	1	1	1	1111171	1	1	1	2110130	1	1	1	1	1	2466537	1362949	1	1	CPD-11399	CPD-11399 [ C15H26O, tgt= ]			(226.2163, 1376.06)(240.23257, 45655.484)(241.23567, 5914.457)(249.20569, 1293.3575)	17.079
&alpha;-patchoulene	1	1	1	1	1	1	269657	1	1	1	1	1	1	1	1	1	264913	1	598743	1	CPD-11413	CPD-11413 [ C15H24, tgt= ]			(227.17622, 23189.447)(228.17937, 1921.4366)	7.853
&beta;-patchoulene	1	1	1	1	1	1	269657	1	1	1	1	1	1	1	1	1	264913	1	598743	1	CPD-11414	CPD-11414 [ C15H24, tgt= ]			(227.17622, 23189.447)(228.17937, 1921.4366)	7.853
&gamma;-patchoulene	1	1	1	1	1	1	269657	1	1	1	1	1	1	1	1	1	264913	1	598743	1	CPD-11415	CPD-11415 [ C15H24, tgt= ]			(227.17622, 23189.447)(228.17937, 1921.4366)	7.853
salicin	378095	15375959	1	17299480	10187413	14051620	20514856	12725081	18116140	256157	14380658	195896	339818	5916931	314543	1	1	1	1	15901262	CPD-1142	CPD-1142 [ C13 H18 O7, tgt=47.48, overall=47.48 ]			(287.1104, 4673.298)(287.11105, 10085.85)(269.10742, 44060.387)(270.1076, 7072.2656)(304.13922, 536.45)(309.09628, 2133.9333)(291.0842, 5511.724)	2.41912
zerumbone	2159924	2687568	1983304	1882154	614509	769413	2989652	729180	2654276	3102646	3157717	1027167	2314521	643211	2641599	2061253	3362978	2166752	3099616	1248842	CPD-11421	CPD-11421 [ C15 H22 O, tgt=77.00, overall=77.00 ]			(221.47295, 5498.177)(222.1901, 413.33)(241.15547, 63282.492)(242.15845, 7077.685)(226.15533, 418.64664)	2.138
10-hydroxy-&alpha;-humulene	1	1	1915653	2031942	1	1	321573	1	4738625	1	726935	242490	1	6228458	1	4358479	325863	852431	1	1	CPD-11422	CPD-11422 [ C15H24O, tgt= ]			(221.18645, 54200.98)(222.1902, 16802.72)(221.18721, 177450.38)(222.19032, 27194.357)(223.1922, 1448.04)(203.18326, 364.81)(245.18134, 2676.4055)(246.38095, 707.964)(228.17084, 1226.2001)	1.58
plaunotol	1	1	1	1	1	1	2260777	1	1	1	1	1	1	1	1	1	1666507	1781582	1704860	1	CPD-11423	CPD-11423 [ C20H34O2, tgt= ]			(292.2649, 743.16)(306.27734, 48145.383)(307.28043, 8286.814)	20.565
&alpha;-eudesmol	1	1	1	1	1	1	1111171	1	1	1	2110130	1	1	1	1	1	2466537	1362949	1	1	CPD-11430	CPD-11430 [ C15H26O, tgt= ]			(226.2163, 1376.06)(240.23257, 45655.484)(241.23567, 5914.457)(249.20569, 1293.3575)	17.079
&beta;-eudesmol	1	1	1	1	1	1	1111171	1	1	1	2110130	1	1	1	1	1	2466537	1362949	1	1	CPD-11432	CPD-11432 [ C15H26O, tgt= ]			(226.2163, 1376.06)(240.23257, 45655.484)(241.23567, 5914.457)(249.20569, 1293.3575)	17.079
10-<i>epi</i>-&gamma;-eudesmol	1	1	1	1	1	1	1111171	1	1	1	2110130	1	1	1	1	1	2466537	1362949	1	1	CPD-11433	CPD-11433 [ C15H26O, tgt= ]			(226.2163, 1376.06)(240.23257, 45655.484)(241.23567, 5914.457)(249.20569, 1293.3575)	17.079
N-isopropylformamide	1	1	1	1	1	1	1147272	1	1	1	1	1	1	1	1	1	1	1	1	1	CPD-11435	CPD-11435 [ C4 H9 N O, tgt= ]			(110.0604, 41191.73)(111.0631, 1276.03)	2.47
(2-hydroxyphenyl)acetate	1	1	497638	1	1	478431	1	1	566974	516320	176405	408149	469374	1	693296	479178	1	1	1	1	CPD-11495	CPD-11495 [ C8H7O3, tgt= ]			(153.0429, 1830.3301)(154.0503, 446.75)(153.0496, 1396.39)(170.0811, 1221.0)(151.05928, 20159.914)(152.05951, 1786.56)(160.0299, 679.05)	2.445
&beta;-selinene	1	1	1	1	1	1	269657	1	1	1	1	1	1	1	1	1	264913	1	598743	1	CPD-11504	CPD-11504 [ C15H24, tgt= ]			(227.17622, 23189.447)(228.17937, 1921.4366)	7.853
olivetol	421740	590551	572091	366743	550503	350988	938262	776338	599993	355079	714175	1012926	405412	304200	357203	234251	879496	1	670780	882053	CPD-11505	CPD-11505 [ C11 H16 O2, tgt=65.81, overall=65.81 ]			(181.1225, 39719.54)(182.12564, 3585.97)(163.1119, 5997.035)(181.12305, 20935.854)(182.12627, 1414.105)(163.1128, 6218.895)(203.10484, 5361.065)	9.74075
tetraketide pyrone	689135	635779	641097	1	1	1	768176	636599	652840	777408	627102	745113	585272	1	652276	592424	686237	709802	697480	1	CPD-11506	CPD-11506 [ C12 H15 O4, tgt=63.68, overall=63.68 ]			(205.08678, 15967.774)(206.09027, 517.926)(225.1039, 146.92)	17.619
triketide pyrone	1320961	904506	953303	843208	763320	957665	1073243	898674	1069469	1347019	1010963	1251675	954207	747301	1191021	934416	1237284	1046461	1177018	1	CPD-11507	CPD-11507 [ C10 H13 O3, tgt=78.74, overall=78.74 ]			(163.07611, 29661.275)(164.07936, 1669.6184)	17.473
<i>trans</i>-tuberonic acid glucoside	543117	218786	580808	148595	204148	191305	385172	227111	231834	1637390	266276	808830	2004583	238987	506049	205008	1381919	1879244	416431	1	CPD-11510	CPD-11510 [ C18 H27 O9, tgt=48.23, overall=48.23 ]			(387.4949, 4550.232)(369.15158, 5401.56)(370.1604, 142.99666)(389.6182, 2526.7803)(390.17578, 222.58)(371.16724, 14411.495)(372.39563, 1786.4744)(405.20984, 1916.395)(387.85843, 16557.06)(388.1836, 8573.795)(410.96307, 7196.575)(411.168, 3738.8801)	5.61179
3-oxo-2-(cis-2'-pentenyl)-cyclopentane-1-(3R-hydroxyoctanoyl)-CoA	1	1	1	1	1	67034	1	90892	1	132129	1	1	209456	209732	80639	1	1	1	1	1	CPD-11519	CPD-11519 [ C39 H60 N7 O19 P3 S, tgt= ]			(1056.2991, 2500.008)(1057.2983, 594.635)(1055.3003, 2675.1416)(1056.2991, 1417.16)	29.612
3-oxo-2-(cis-2'-pentenyl)-cyclopentane-1-(3-oxooctanoyl)-CoA	1	1	1	1	1	1	1	1	1	96212	1	1	153943	148122	1	1	1	1	1	1	CPD-11520	CPD-11520 [ C39 H58 N7 O19 P3 S, tgt= ]			(1054.2997, 3254.0266)(1055.3007, 3487.1667)(1056.2992, 3234.7703)(1057.2983, 594.635)	29.611
dihydroconiferyl aldehyde	1235731	872686	917342	817697	465694	907968	258328	861189	1013503	1254212	1	1176845	914412	737154	546939	887280	1164414	1	1120552	425694	CPD-11530	CPD-11530 [ C10 H12 O3, tgt=78.46, overall=78.46 ]			(163.07628, 28593.605)(164.07954, 1573.8499)(180.1018, 10743.825)(181.1056, 1840.3)(188.07085, 166236.05)(189.07344, 20183.268)(190.0763, 1482.385)	14.6
carbidopa	1	1	1	1	1	1	1	1	1	1	1	1	1	85227	1	1	1	1	1	1	CPD-11550	CPD-11550 [ C10H14N2O4, tgt= ]			(227.0922, 2977.67)(209.0817, 6134.45)	4.288
4-(2-amino-3-hydroxyphenyl)-2,4-dioxobutanoate	211697	1	347880	606008	402864	527619	125104	227271	361599	281789	196018	163517	279602	773365	170649	241703	252069	184210	248730	223397	CPD-11552	CPD-11552 [ C10 H8 N O5, tgt=46.41, overall=46.41 ]			(225.44458, 706.037)(227.0501, 311.12)(205.2512, 902.5089)(206.0408, 563.27)(240.27878, 866.06506)(225.0765, 1142.2999)(246.71936, 22400.678)(250.04727, 6276.876)(228.3561, 1706.6964)(230.77565, 13615.766)(231.69495, 4991.8936)	2.068
hexaketide pyrone	426971	486703	595393	477450	89036	252958	1	256402	690950	526042	192993	302969	315273	375659	402227	362427	1	1	207333	280913	CPD-11553	CPD-11553 [ C12 H9 O5, tgt=47.49, overall=47.49 ]			(233.04254, 3196.2776)(216.8623, 630.1255)(218.04376, 3542.5212)(219.24869, 9026.268)(220.0487, 483.97)(237.06136, 737.658)(219.04936, 7079.1772)(253.08795, 1040.7449)(254.08821, 5970.2417)(255.0934, 134.72)(233.06195, 1051.1188)(256.3446, 2708.3877)(239.02797, 1021.4768)	1.649
heptaketide pyrone	139651	1	1	1	1	1	1	1	1	201324	1	1	157929	1	252352	1	1	1	1	1	CPD-11554	CPD-11554 [ C14 H11 O6, tgt=46.01, overall=46.01 ]			(275.05957, 5328.15)(276.05286, 538.555)(258.05246, 1920.6434)(259.04337, 6358.1196)(261.05603, 22250.951)(262.0622, 2200.79)(277.06665, 4397.17)(261.0538, 14958.85)(262.0554, 468.1)(263.058, 9233.73)(280.09232, 711.96)	3.396
octoketide	402186	335962	357125	336947	367444	396314	251000	344594	1530381	383632	329596	295948	358577	1818211	387109	1877747	270080	242476	342080	270178	CPD-11555	CPD-11555 [ C16 H13 O7, tgt=53.22, overall=53.22 ]			(317.06802, 24359.154)(318.06937, 3529.5398)(339.10794, 2692.6133)(325.05823, 106089.81)(326.0606, 7788.053)(327.0561, 935.81)	6.904
octoketide 4b	402186	335962	357125	336947	367444	396314	251000	344594	1530381	383632	329596	295948	358577	1818211	387109	1877747	270080	242476	342080	270178	CPD-11556	CPD-11556 [ C16 H13 O7, tgt=53.22, overall=53.22 ]			(317.06802, 24359.154)(318.06937, 3529.5398)(339.10794, 2692.6133)(325.05823, 106089.81)(326.0606, 7788.053)(327.0561, 935.81)	6.904
aloenin	163878	1	113025	1	1	124278	1	1	120370	199343	1	1	121891	182840	173435	168898	1	1	1	1	CPD-11557	CPD-11557 [ C19 H22 O10, tgt=36.52, overall=36.52 ]			(411.01407, 5749.4644)(412.13348, 2527.99)(397.1122, 1306.3)(393.116, 3691.55)(413.14188, 5205.5327)	3.978
aloesin	1	1	1	1	1	1	282942	1	1	1	188356	169433	161570	1	268233	1	290964	162146	209013	1	CPD-11558	CPD-11558 [ C19H21O9, tgt= ]			(393.1176, 2722.18)(395.1327, 7726.82)(381.1175, 2653.28)(411.1543, 13421.912)(412.15598, 1967.1415)	7.734
3-(indol-3-yl)acrylate	561785	6356127	8277656	7719704	6742510	6622646	7080171	6853387	10765370	1	6076218	8451484	407895	8379368	614122	7734265	7156242	5910696	6957059	5741335	CPD-11578	CPD-11578 [ C11 H8 N O2, tgt=59.12, overall=59.12 ]			(191.0712, 5661.37)(169.0519, 42538.75)(170.0503, 36912.32)(171.05173, 3084.862)(172.05893, 5176.2)(187.17688, 73798.84)(188.2601, 8254.11)(169.05281, 54409.46)(170.05135, 44160.598)(205.09796, 17124.492)(186.9533, 50313.516)(188.07996, 9658.915)(191.03584, 2794.8398)	1.8789
chrysophanol anthrone	1036853	1	198116	427222	172615	484691	315642	551786	469685	1009194	240493	846367	1081928	928235	1977980	427608	235621	247492	384858	270877	CPD-11587	CPD-11587 [ C15 H12 O3, tgt=56.55, overall=56.55 ]			(241.30252, 9155.118)(242.07843, 5030.6665)(223.06462, 4840.58)(242.0875, 2859.91)(245.1001, 840.11)(224.0777, 6980.571)(258.25394, 15202.686)(259.12296, 1547.8949)(240.76758, 1023.1667)(263.57278, 6150.0527)(245.05186, 172.44331)	3.61865
barbaloin	275882	110911	177863	191227	1	217823	286860	108619	248072	349089	325562	1	1	296444	188830	352265	138152	102885	275976	1	CPD-11590	CPD-11590 [ C21 H22 O9, tgt=65.25, overall=65.25 ]			(438.97464, 19633.123)(439.89355, 11680.923)(440.1614, 5299.407)(423.1622, 327.94)(441.11633, 12649.325)	4.415
16-feruloyloxypalmitate	435319	340100	448513	335581	403584	357197	1	380518	439248	392009	96950	208739	684684	525563	529104	424380	108696	110606	1	314694	CPD-11591	CPD-11591 [ C26 H39 O6, tgt=14.44, overall=14.44 ]			(429.27548, 12050.082)(430.27814, 3248.205)(431.28235, 5326.8228)(436.29245, 639.00336)(467.3157, 331.09)(447.3079, 8190.7)(448.3109, 145.95)(475.27316, 2666.2183)	17.84
15-hydroxypentadecanoate	1	1	1	1	1	1	348379	1	1	1	1	1	1	1	1	1	496153	360138	406672	1	CPD-11594	CPD-11594 [ C15H29O3, tgt= ]			(263.23764, 42558.08)(245.227, 13445.617)(277.24667, 138737.67)(279.2484, 22734.87)(280.2639, 437110.16)	18.997
pentadecan-1-ol	1	1	1	1	1	1	408032	1	1	1	787654	1	1	1	1	1	128150464	481413	102530136	1	CPD-11595	CPD-11595 [ C15 H32 O, tgt= ]			(251.63557, 27392.13)(252.63884, 3236.898)(233.2264, 7595.9434)	18.5313
stigmasterol 3-O-&beta;-D-glucoside	2744691	493291	2251930	3173856	4743338	2728987	234769	1483596	2187382	83401664	131664	1947841	70025296	673607	50660384	4444727	1	135701	324047	5822691	CPD-11606	CPD-11606 [ C35 H58 O6, tgt=51.69, overall=51.69 ]			(579.43146, 34675.723)(580.43134, 10423.424)(579.4279, 42605.13)(580.4309, 9127.913)(557.41547, 46220.25)(558.4185, 9778.158)(559.40356, 468.865)(592.4444, 12142.985)(593.4474, 1003.73)(575.4633, 4575.93)(576.4669, 675.38)(599.7144, 19546.826)(600.7896, 6293.9253)(580.47394, 376924.9)(581.4763, 83674.95)(581.92035, 29293.406)(582.4237, 5716.9062)	15.1256
&beta;-sitosterol 3-O-&beta;-D-glucoside	1117780	1	501550	88177	1056351	1074396	60734312	1	132379	80030360	1	1266416	65297096	491781	28176402	1	339225	214537	231018	778626	CPD-11608	CPD-11608 [ C35 H60 O6, tgt=43.27, overall=43.27 ]			(558.4169, 9502.033)(595.4723, 9698.581)(596.4759, 3025.9814)(601.4323, 14232.96)(601.4341, 6438.9766)(582.4221, 15441.752)(582.4225, 3459.048)	18.0194
4-methylumbelliferyl glucoside	1	1	1	1	1	1	2703424	1	1	1	2644572	1	1	1	1	1	1522835	1781893	2982826	1	CPD-11641	CPD-11641 [ C16H18O8, tgt= ]			(338.13104, 74957.04)(339.13348, 4943.1157)(340.1283, 362.06998)	14.348
trihydroxyferuloyl spermidine	1	1	1	1	1	1	895299	1	1	1	1012448	1	1	1	1	1	508972	595066	1039759	1	CPD-11667	CPD-11667 [ C37 H43 N3 O12, tgt= ]			(705.2806, 2437.6)(705.28156, 1938.53)(727.27405, 1583.9719)	14.348
dihydroxyferuloyl-sinapoyl spermidine	1	1	1	1	1	1	109430	1	1	1	1	1	1	1	1	1	177675	1	1	1	CPD-11668	CPD-11668 [ C38 H45 N3 O12, tgt= ]			(717.2742, 8290.165)(718.27734, 2117.745)	8.36
ent-16-a-hydroxy-kaurene	1	1	1	1	1	1	4241189	1	1	1	9632553	1	1	1	1	1	7690614	5151410	5998910	1	CPD-11669	CPD-11669 [ C20 H34 O, tgt= ]			(291.26892, 14647.79)(292.26483, 7802.285)(293.2649, 977.8875)(273.25836, 1002.125)(291.2682, 23576.43)(273.2577, 2891.65)(308.29572, 183697.86)(309.2987, 38099.562)(310.30182, 2535.406)(314.2625, 1161.37)	19.783
esculin	135921	269948	245818	288052	237397	265835	262465	283021	326878	205136	348062	274338	301658	243887	393882	238408	267592	296291	266377	207764	CPD-11682	CPD-11682 [ C15 H16 O9, tgt=44.06, overall=44.06 ]			(344.0918, 910.08435)(323.0747, 7842.37)(323.07416, 9937.047)(366.08514, 468.21503)(367.0756, 246.06999)(348.07065, 1063.1531)(349.0617, 4692.4443)(350.06314, 634.54333)	1.561
quercetin 3'-O-glucoside	199381	1	1	1	1	1	1	1	1	1	1	1	199920	1	325430	1	1	1	1	1	CPD-11684	CPD-11684 [ C21 H19 O12, tgt=0.38, overall=0.38 ]			(445.0863, 1858.3634)(447.1004, 556.17)(471.08456, 1117.75)	1.588
quercetin 4'-O-glucoside	199381	1	1	1	1	1	1	1	1	1	1	1	199920	1	325430	1	1	1	1	1	CPD-11685	CPD-11685 [ C21 H19 O12, tgt=0.38, overall=0.38 ]			(445.0863, 1858.3634)(447.1004, 556.17)(471.08456, 1117.75)	1.588
1,8-dihydroxy-3-methylnaphthalene	546234	414109	506594	450410	437722	393737	438737	404910	576168	590157	376518	445789	439496	474432	594623	419169	512040	403819	470602	363338	CPD-11688	CPD-11688 [ C11 H10 O2, tgt=35.76, overall=35.76 ]			(175.43407, 1508.759)(159.06918, 4185.245)(158.77025, 4741.856)(159.06856, 3841.197)(176.09253, 1530.4861)	1.406
2-methyl-6-geranylgeranyl-1,4-benzoquinol	624447	507502	554731	591432	492489	494600	172575	803170	504938	593768	282373	521300	807250	964076	673612	632033	162485	150178	254217	606160	CPD-11712	CPD-11712 [ C27 H40 O2, tgt=81.05, overall=81.05 ]			(414.33682, 27689.219)(415.33975, 7003.6494)	7.688
2-methyl-6-farnesyl-1,4-benzoquinol	615595	1	1095925	975156	708327	423274	878034	1212104	1241071	910444	2366449	927520	2040485	522922	2262637	191086	1597546	1244211	1162580	1383734	CPD-11714	CPD-11714 [ C22 H32 O2, tgt=36.15, overall=36.15 ]			(312.83487, 1183.7839)(313.2387, 1188.75)(313.24985, 528.7867)(316.2607, 1215.065)(348.27505, 15894.899)(349.27826, 2149.9854)(328.26144, 43335.242)(329.26447, 8464.734)(353.23056, 60924.152)(354.23367, 10299.866)(355.23526, 1087.9539)	12.9477
phaselate	1836593	965778	1762087	1416565	1397088	2149140	306654	1485149	1924137	1647623	347920	1335697	1745769	1640433	1523693	1594708	306051	285013	377429	1074927	CPD-11724	CPD-11724 [ C13 H10 O8, tgt=76.32, overall=76.32 ]			(294.0382, 588.7767)(276.02283, 1155.7151)(277.03284, 86929.12)(278.03647, 7052.1216)(312.07123, 441.305)(295.867, 15408.659)(297.06946, 1388.9989)(298.0655, 1163.6311)(301.11615, 5511.977)(303.01974, 1289.6641)	1.656
echinatin	188983	213423	234511	272228	1	132844	171331	203503	196364	232009	190327	230950	236585	263381	193078	127239	326257	125174	170580	221505	CPD-11760	CPD-11760 [ C16 H14 O4, tgt=50.81, overall=50.81 ]			(274.0939, 6231.15)(255.75041, 5341.145)(256.0822, 1622.55)(275.21622, 4390.7227)(276.10876, 8288.273)(254.08792, 15232.619)(255.84863, 6068.24)(256.10062, 8575.511)(270.26685, 8565.981)(294.0877, 399.04)(277.06796, 11703.968)(278.40833, 1001.3433)	2.089
bisorganyltrisulfane	127463	1	1	1	99365	106922	83694	1	102111	109888	114247	1	1	129620	120306	136900	108881	85852	139140	1	CPD-11763	CPD-11763 [ C20 H32 N6 O12 S3, tgt=11.94, overall=11.94 ]			(649.1143, 6699.0723)(650.1183, 314.4)(630.13574, 48387.773)(631.63666, 5095.4126)(669.1455, 448.8475)	6.892
7,8-dihydromonapterin	1	1	1	1	1	1	1	1	1	1	229858	1	1	1	1	1	1	1	1	1	CPD-11770	CPD-11770 [ C9H13N5O4, tgt= ]			(258.1098, 2730.37)(255.1202, 9066.77)	5.752
strictosamide	234401	428037	307203	114081	111564	215049	358888	94160	298275	189177	236676	311191	594259	246043	676728	184510	1294033	365015	613312	110983	CPD-11775	CPD-11775 [ C26 H30 N2 O8, tgt=49.91, overall=49.91 ]			(503.20038, 2093.755)(483.187, 611.495)(505.22626, 764.395)(486.1066, 24360.021)(486.663, 24351.676)(487.21558, 40113.57)(517.83, 22571.457)(519.23883, 23101.564)(520.1264, 14035.443)(520.80176, 4871.6304)(521.24634, 2820.58)(503.24796, 1885.8959)(503.19052, 8907.373)	6.488
camptothecin	1	132328	131872	1	163621	1	143650	129695	1	121350	249982	183159	176278	136994	1	108239	144551	144303	207963	190531	CPD-11776	CPD-11776 [ C20H16N2O4, tgt= ]			(331.10135, 2728.17)(333.12048, 6798.8335)(369.5548, 6722.242)(371.16046, 13737.379)(349.13348, 8089.625)(351.1414, 288.42)(353.1568, 863.83)(371.10114, 8952.943)(372.10187, 1556.882)(373.09955, 782.06)(353.08505, 5333.65)	12.8409
coumestrol	372214	671857	346341	417887	870746	354736	1108008	635330	732956	597679	1157931	305418	452823	379936	465880	225302	397714	1131007	539683	383186	CPD-11779	CPD-11779 [ C15 H8 O5, tgt=58.37, overall=58.37 ]			(273.04636, 7717.8486)(252.02567, 441.805)(273.716, 2614.2131)(251.03963, 4173.0767)(289.87985, 1620.989)(289.6783, 2344.66)(273.08044, 762.0467)(291.02032, 23161.727)(293.02002, 1178.385)(274.81866, 15036.153)(276.76312, 52900.27)(277.67804, 44113.402)(278.03662, 8498.955)	1.661
3,9-dihydroxypterocarp-6a-en	1044085	810177	1064310	915654	426941	1070897	1	475243	1400462	11962320	1	479468	1195727	1134701	1675751	1651988	302108	1	716689	6722317	CPD-11782	CPD-11782 [ C15 H10 O4, tgt=33.89, overall=33.89 ]			(259.0726, 1042.1876)(237.0613, 1816.11)(275.941, 6477.0156)(276.1094, 4711.26)(254.71115, 13948.621)(255.09113, 2033.4733)(279.04688, 9920.91)(259.44388, 59648.19)(261.24762, 10696.006)(262.38403, 1754.2734)	2.19959
(<i>22R,23R</i>)-28-homobrassinolide 22-sulfate	1077602	369792	1132077	1054912	415358	800625	248862	881711	1260996	1028603	158352	1042566	935372	966609	572191	1077668	917180	228240	768708	460570	CPD-11826	CPD-11826 [ C29 H49 O9 S, tgt=63.25, overall=63.25 ]			(555.29877, 36457.5)(556.30133, 6905.6113)(579.29193, 18970.812)(580.29517, 5496.4727)(581.2991, 249.62)	11.9833
(<i>22R,23R</i>)-28-homocastasterone	1423982	1284537	1307559	1465711	1663457	1175470	1	1039091	1210619	1409812	1	1163493	1968870	745910	1546433	1930729	1	1	1	1657275	CPD-11827	CPD-11827 [ C29 H50 O5, tgt=54.63, overall=54.63 ]			(483.37778, 78546.43)(484.38068, 12218.489)(461.3644, 34503.33)(462.36728, 3989.1538)(503.371, 949.71173)(486.29056, 17153.88)(487.24792, 3036.9565)(487.3599, 476.53)	20.825
(<i>22R,23R</i>)-28-homocastasterone 22-O-sulfate	2708334	2161505	941752	2399083	1220953	442112	2224611	2208001	2903716	2621487	186249	1295426	2488102	559532	2813510	295264	2440523	2179537	116575	838052	CPD-11828	CPD-11828 [ C29 H49 O8 S, tgt=60.86, overall=60.86 ]			(540.65857, 44895.492)(541.87897, 17653.732)(542.6782, 3569.2537)(542.6441, 14844.327)(543.0615, 3108.1375)(545.3314, 5363.6)(546.336, 770.26)(575.3624, 6491.378)(576.3806, 8269.4)(559.3102, 6834.37)(560.3131, 1203.33)(561.3256, 6344.16)(562.3818, 3730.871)(564.2979, 110.21)	9.49435
24-epibrassinolide	428571	331240	347760	406431	527748	279734	1	249111	286421	378483	1	256057	560189	329637	429508	616675	1	1	1	536850	CPD-11835	CPD-11835 [ C28 H48 O6, tgt=64.28, overall=64.28 ]			(486.3569, 22549.479)(464.34366, 15096.25)(465.8459, 186.555)(483.37784, 93616.11)(484.38065, 15064.7)(507.33792, 387.0057)(486.5292, 1839.4816)	20.825
24-epicathasterone	73977928	120037184	121725216	133205400	123338280	134096384	80081024	75610672	138133856	137709744	77795968	125419656	135274112	142165296	55033104	138235616	73703128	97224272	82319376	124913600	CPD-11837	CPD-11837 [ C28 H48 O3, tgt=58.45, overall=58.45 ]			(414.33893, 423338.75)(415.3423, 120093.625)(416.35492, 2029427.2)(417.35855, 582555.06)(418.36127, 82881.64)(419.3637, 7810.6587)	8.618
24-epicathasterone-22-O-sulfate	1090831	1143699	1	1203192	1052273	934916	698728	1	1	1181062	607423	942774	1271264	292234	1	1	1387142	504546	1	1252787	CPD-11839	CPD-11839 [ C28 H47 O6 S, tgt=20.70, overall=20.70 ]			(534.7198, 34615.01)(535.2934, 6782.6953)(517.2905, 2091.39)	7.3387
6-deoxo-24-epicathasterone	1	1	1	1	1	1	109396	1	1	1	136898	1	1	1	1	1	1	1	1	1	CPD-11840	CPD-11840 [ C28H50O2, tgt= ]			(424.36218, 8352.5)(425.37006, 2886.545)	17.43
<i>N</i>-vanillate-L-glutamate	595522	778083	1246567	865205	1071617	496069	700358	535045	1085012	2204954	403597	1764311	2556228	608053	4441189	1817602	883878	319900	704710	599679	CPD-11845	CPD-11845 [ C13 H13 N O7, tgt=63.66, overall=63.66 ]			(295.7358, 12893.925)(297.0692, 1520.2916)(279.06897, 3106.545)(296.0679, 70482.48)(297.0705, 5048.1797)(298.0667, 4467.64)(279.7856, 4419.486)(296.1043, 418.96)(323.0741, 7859.929)(301.15442, 72038.67)(304.054, 24116.994)(305.05585, 3130.2441)	3.50075
<i>N</i>-benzoyl-L-glutamate	584144	125728	376390	507441	121460	336157	433695	440581	457613	867471	284841	291315	895503	329336	525230	370125	1	1	1	325768	CPD-11846	CPD-11846 [ C12 H11 N O5, tgt=43.81, overall=43.81 ]			(249.0618, 1698.17)(231.05022, 5045.406)(254.08807, 7325.4736)(255.0909, 575.57)(267.63004, 15035.687)(252.08842, 587.4942)(277.0664, 285.07)	2.42929
<i>N</i>-(4-hydroxybenzoyl)-L-glutamate	806559	94376	644705	84386	689115	823392	279915	579587	843419	800744	203165	621312	1280879	576741	632295	555052	270650	213878	270536	448095	CPD-11847	CPD-11847 [ C12 H11 N O6, tgt=38.91, overall=38.91 ]			(267.05612, 1090.28)(247.04419, 17178.123)(248.05049, 796.92413)(270.0835, 812.72)(283.9309, 5990.8306)(285.70508, 1022.014)(292.8637, 7293.0547)(293.0646, 9601.27)(273.04602, 8111.8853)(274.45123, 1035.374)(275.0498, 1995.2534)	1.879
dehydroscoulerine	2758172	2605264	3046549	2433214	2720558	2022764	2073737	1639271	2806992	2719378	1	4392861	1	344743	6815983	344015	11127395	1542476	11494454	2465618	CPD-11852	CPD-11852 [ C19 H18 N O4, tgt=38.76, overall=38.76 ]			(325.18976, 264688.12)(326.12125, 33978.14)(327.1227, 6173.7104)(306.11215, 4005.33)(307.1117, 1694.11)(311.9321, 499.16797)(344.1714, 3695.685)(325.1421, 390.68)(349.1277, 114417.93)(350.1306, 17648.064)(351.13025, 2244.7449)	8.614
4-methoxycinnamate	347827	389085	621758	741173	354972	858902	553285	361319	4737331	1053132	725735	267469	317985	552666	445213	1538446	459128	288225	693240	221589	CPD-11884	CPD-11884 [ C10 H9 O3, tgt=78.35, overall=78.35 ]			(177.05624, 29098.926)(178.05946, 2344.2815)(161.0454, 269.31)(160.38939, 3149.0486)(197.76306, 339.4233)(180.08826, 656.3667)(181.0866, 147.54)(200.9395, 6298.5005)(202.68985, 5731.8667)(204.0596, 45.85)(183.0321, 902.6)	5.4851
wortmanin	406697	1	210076	202131	1	120680	282942	1	300114	1	188356	102437	1	1	1	1	290964	162146	209013	1	CPD-11924	CPD-11924 [ C23 H24 O8, tgt=52.89, overall=52.89 ]			(413.1416, 3340.25)(435.1833, 614.02)(411.48416, 12695.5625)(412.1559, 1973.482)(450.19806, 33446.46)(451.20074, 6316.224)(429.17422, 9776.942)(430.6842, 2912.1401)(433.172, 6458.35)(454.9511, 10702.58)(456.1566, 16936.137)(457.1543, 3478.8938)	6.82745
1D-<i>myo</i>-inositol 1,5-bis(diphosphate) 2,3,4,6-tetrakisphosphate	1	1	1	1	1	1	1	1	1	1	123348	1	1	1	1	1	123528	1	1	1	CPD-11938	CPD-11938 [ C6H6O30P8, tgt= ]			(828.7059, 7613.61)(832.68304, 1610.13)(833.6858, 535.46)	17.889
3,5-bisdiphosphoinositol-1D-<i>myo</i>-inositol 2,3,4,6-tetrakisphosphate	204073	121050	1	1	149466	185145	191528	1	1	158843	123348	171770	170430	1	217010	1	123528	194067	1	135897	CPD-11939	CPD-11939 [ C6 H6 O30 P8, tgt=12.05, overall=12.05 ]			(787.6798, 1607.19)(827.7929, 10482.048)(828.71326, 5052.8164)(808.73706, 1098.8184)(832.68304, 1610.13)(833.6858, 535.46)(813.69366, 1716.2461)	24.5952
apiforol	372496	130428	1	268444	139879	160434	264240	191925	173446	129773	358205	195482	294557	224557	739263	194085	441774	236103	505667	234428	CPD-11940	CPD-11940 [ C15 H14 O5, tgt=47.50, overall=47.50 ]			(274.0835, 2792.322)(260.58685, 522.685)(261.09277, 1718.708)(293.83246, 1727.7422)(275.18182, 2057.7966)(276.10895, 4130.788)(297.07, 4499.324)(298.0662, 4040.9539)(299.06796, 403.325)(280.8207, 5866.5273)	1.794
luteoforol	933859	1	1	1	1	1	216203	1	98578	1013636	227367	547374	809623	1	1	1	1	1	1	1	CPD-11941	CPD-11941 [ C15 H14 O6, tgt=38.86, overall=38.86 ]			(290.2444, 5300.2383)(291.08487, 6196.6484)(273.08292, 16295.709)(274.0836, 2615.26)(311.125, 1191.8116)(312.1308, 1437.47)(294.11795, 788.556)(296.06708, 42432.066)(297.07013, 3955.4727)(298.06628, 3578.7974)	1.607
dimethyl selenide	1	227212	1	1	1	1	1	95208	1	1	1	1	129056	1	1	99354	1	1	1	78828	CPD-12005	CPD-12005 [ C2 H6 Se, tgt= ]			(108.969955, 10358.4)(108.97073, 6298.1133)(129.99866, 29252.787)(131.00137, 7031.4717)(135.01363, 1991.5834)(128.9523, 997.35)	1.441
Se-methyl-L-selenocysteine	447187	430286	374369	524898	518803	527527	261608	501136	347416	516015	238235	156343	281709	1909094	375695	359948	265084	314476	367122	513952	CPD-12024	CPD-12024 [ C4 H9 N O2 Se, tgt=51.02, overall=51.02 ]			(182.23376, 637.64)(158.97432, 5907.4873)(169.97868, 1943.3058)(170.97728, 1112.6017)(179.04318, 9973.756)(180.44054, 2531.2446)(182.77011, 949.76105)(161.9804, 4067.0498)(169.97874, 2809.0134)(207.3074, 896.96)(209.02614, 968.72)(189.2996, 1264.2535)(192.0147, 336.54)(200.97357, 12157.561)(201.97484, 3075.2134)(202.9718, 4032.5195)(212.97714, 265.16998)(182.61296, 35605.91)(183.76349, 22619.988)…	1.414
Se-methyl-Se-L-methionine	1433458	238145	362587	133916	1219785	258115	443762	193795	278919	1559414	1061006	117178	264658	506888	294335	290824	718865	881565	1222590	1661318	CPD-12025	CPD-12025 [ C6 H14 N O2 Se, tgt=45.99, overall=45.99 ]			(208.35841, 5932.1763)(216.92163, 6105.0728)(218.7764, 38080.234)(220.03087, 2095.7332)(193.51015, 4050.6548)(191.01424, 1000.03204)(192.80972, 937.368)(196.20708, 3587.3816)(199.68651, 1829.0033)(211.92664, 11607.074)(230.79279, 1663.8115)(235.56282, 4841.136)(236.56245, 6475.335)(212.20319, 1032.4376)(221.0652, 1294.0233)(235.81778, 5085.5703)(212.60722, 29063.963)(214.00468, 1660.4459)	3.058
2-[hydroperoxy(4-hydroxyphenyl)methyl]-6-hydroxy-1-benzofuran-3-one	578344	357862	474502	454853	243454	365927	1	343242	420077	601821	1	316612	506085	467356	668940	576727	1	1	1	1	CPD-12032	CPD-12032 [ C15 H12 O6, tgt=48.03, overall=48.03 ]			(288.05923, 28097.176)(289.0613, 3049.1108)	7.481
6-hydroxy-2-(6-oxo-1-oxaspiro[2.5]octa-4,7-dien-2-yl)-1-benzofuran-3-one	903200	1	638839	664213	1	257267	1	450146	522147	1045972	1	174079	838851	874404	609264	606569	1	1	1	1	CPD-12036	CPD-12036 [ C15 H10 O5, tgt=70.89, overall=70.89 ]			(274.34433, 1871.7344)(288.08734, 1829.2942)(289.08188, 444.31665)(273.17444, 7067.3354)(274.08337, 2988.3477)(294.03815, 159.07)(277.03333, 113762.25)(278.03668, 8809.33)(279.03848, 10867.037)	1.893
hispidol	1	1	1	1	1	1	1	1	1	11962320	1	1	1	1	1	1	1	1	1	6722317	CPD-12037	CPD-12037 [ C15H10O4, tgt= ]			(254.0873, 46575.555)(255.09009, 2886.535)(259.04306, 251342.56)(260.04605, 20018.17)(261.0488, 2053.2)	3.029
6-hydroxy-2-(4-hydroxy-phenoxymethylene)-benzofuran-3-one	903200	1	638839	664213	1	257267	1	450146	522147	1045972	1	174079	838851	874404	609264	606569	1	1	1	1	CPD-12038	CPD-12038 [ C15 H10 O5, tgt=70.89, overall=70.89 ]			(274.34433, 1871.7344)(288.08734, 1829.2942)(289.08188, 444.31665)(273.17444, 7067.3354)(274.08337, 2988.3477)(294.03815, 159.07)(277.03333, 113762.25)(278.03668, 8809.33)(279.03848, 10867.037)	1.893
&alpha;-L-arabinofuranose	1048929	6785845	847171	906393	987343	1010305	543032	879347	1043209	1264960	750668	794695	1099030	7412115	1326810	970556	623471	531872	412631	922006	CPD-12045	CPD-12045 [ C5 H10 O5, tgt=66.31, overall=66.31 ]			(151.85777, 54483.367)(152.80956, 3677.0923)(152.0581, 1224.31)(133.89182, 7813.951)(153.5686, 2538.3826)(133.55286, 2088.9988)(168.08765, 1724.17)(150.22757, 17697.045)(151.15779, 459.68387)(174.04584, 1177.4974)(157.84055, 3095.2559)	2.028
(20<i>S</i>)-ginsenoside Rg3	1767223	140160	2096413	1785931	1854250	1	1914080	877863	1738651	2296823	1750634	1	605181	3483055	1619077	2675272	576062	641118	1739045	2522495	CPD-12102	CPD-12102 [ C42 H72 O13, tgt=54.08, overall=54.08 ]			(784.50757, 838.415)(785.5197, 60.01)(767.98456, 173279.56)(770.4917, 158964.69)(771.49396, 38466.6)(772.49615, 5791.215)(791.02545, 1094.7137)(791.5298, 1481.275)(769.3336, 184041.94)(770.33636, 85175.82)(771.50055, 39044.887)(772.50433, 10202.272)(773.5122, 3394.786)(804.20856, 40235.668)(804.54846, 24039.271)(805.551, 4838.499)(806.71484, 1120.9432)(808.5385, 1049.9)(786.51166, 800.4167)(812.1…	20.2262
(20<i>S</i>)-ginsenoside Rh2	2206148	598065	635830	2402544	5588043	2058722	153918	468498	1548209	2116669	436267	1487788	3545489	1484851	2460501	231746	333094	172314	262945	4815169	CPD-12104	CPD-12104 [ C36 H62 O8, tgt=58.60, overall=58.60 ]			(623.20026, 38849.086)(624.45557, 12770.3)(604.67206, 10332.868)(605.4189, 649.55334)(625.2556, 27720.13)(624.4572, 9806.202)(607.8445, 3494.0762)(611.46716, 2337.4102)(643.4727, 49047.477)(644.4756, 19031.71)(626.82025, 8755.198)(626.4785, 3465.1152)(647.94824, 9724.344)(646.94336, 3377.095)(629.9996, 1341.2014)	19.4878
4-hydroxycoumarin	3438506	767015	1444303	665642	244909	7489909	17596102	286689	760821	4477429	16264701	240488	519032	3830892	1240047	13700384	16332907	1	14567830	247480	CPD-12111	CPD-12111 [ C9 H6 O3, tgt=81.42, overall=81.42 ]			(165.04361, 84101.29)(167.047, 733.9)(147.0287, 11268.609)(164.1535, 167678.34)(164.04308, 10765.906)(165.04973, 527.794)(145.36433, 846.73)(147.0316, 398.31)(182.56891, 4937.7197)(164.92155, 427.3886)(167.01373, 4523.5024)(168.01227, 675.11005)	3.82942
(<i>S</i>)-4-amino-4,5-dihydro-2-thiophenecarboxylate	1	406667	244471	244742	325679	1	5304266	297540	1	1	567572	1	1	237370	1	1	3439241	5165619	3447005	311643	CPD-12132	CPD-12132 [ C5 H7 N O2 S, tgt=44.06, overall=44.06 ]			(145.01541, 3584.6682)(130.00726, 1322.8351)(147.2776, 12209.079)(129.01941, 24099.373)(166.5533, 6601.9478)(166.85324, 3506.72)(168.0508, 3154.1736)(147.04305, 2565.006)(149.0445, 733.74)(172.01215, 1531.1217)(150.99748, 716.52496)	4.12392
2,4,6-trinitrobenzene sulfonate	111027	115540	118949	131110	169578	111110	90784	114865	142071	131710	1	100439	89965	131755	125128	1	80790	101882	89268	109729	CPD-12153	CPD-12153 [ C6 H2 N3 O9 S, tgt=16.11, overall=16.11 ]			(295.9497, 709.3544)(293.46533, 2191.375)(294.4636, 905.625)(275.9562, 1769.0933)(292.9713, 3709.791)(293.9706, 944.6657)(294.96927, 1168.9993)(319.9366, 396.31003)	1.411
26,27-dehydrozymosterol	1	1	1	1	1	1	309146	1	1	1	654382	1	1	1	1	1	374149	447163	496688	1	CPD-12159	CPD-12159 [ C27 H42 O, tgt= ]			(364.32086, 11104.025)(365.32416, 1522.09)	17.884
24-alkyl sterol 2	152650528	5183497	139746480	150067792	4959846	149066960	1640570	75845264	154254624	150598128	1997043	145595504	149493920	65582984	65849076	152516096	72158792	68567536	132791224	5608429	CPD-12161	CPD-12161 [ C28 H46 O2, tgt=67.13, overall=67.13 ]			(414.94336, 599176.4)(415.94672, 171767.77)(418.35745, 22485.83)(419.3616, 10113.36)(396.73114, 2352.696)(397.3263, 616.3)(416.3558, 2003003.0)(417.3594, 569013.75)(418.36212, 81678.35)(419.3646, 7829.239)(398.34457, 3620.7922)	8.583
26-hydroxy-27-methyl-zymosterol	152650528	5183497	139746480	150067792	4959846	149066960	1640570	75845264	154254624	150598128	1997043	145595504	149493920	65582984	65849076	152516096	72158792	68567536	132791224	5608429	CPD-12162	CPD-12162 [ C28 H46 O2, tgt=67.13, overall=67.13 ]			(414.94336, 599176.4)(415.94672, 171767.77)(418.35745, 22485.83)(419.3616, 10113.36)(396.73114, 2352.696)(397.3263, 616.3)(416.3558, 2003003.0)(417.3594, 569013.75)(418.36212, 81678.35)(419.3646, 7829.239)(398.34457, 3620.7922)	8.583
deguelin	197818	154050	158584	263195	1	145100	1	236310	150877	128655	1	1	129458	180795	184571	197372	1	1	1	185954	CPD-12163	CPD-12163 [ C23 H22 O6, tgt=47.60, overall=47.60 ]			(399.16168, 1747.3313)(377.14557, 10792.63)(378.14917, 974.36005)(413.17856, 9626.389)(399.1291, 337.14)	5.025
tephrosin	1	1	1	1	1	1	1	1	1	1	514586	1	1	1	1	1	1	672722	1	1	CPD-12165	CPD-12165 [ C23H22O7, tgt= ]			(410.1647, 31261.195)(411.1671, 3654.3)	13.379
rotenolone	240638	118959	177909	108004	1	161135	168814	129509	196223	142306	514586	161060	185584	235087	259172	208778	355204	672722	119562	1	CPD-12167	CPD-12167 [ C23 H22 O7, tgt=47.50, overall=47.50 ]			(395.4647, 7492.114)(395.13162, 8826.447)(429.17365, 2182.886)(413.1419, 9244.7)(419.1327, 2582.12)(411.0444, 11512.058)(411.76376, 3671.9402)	6.9896
lesquerolate	1	1	1	1	176608	1	1	1	1	1	1	1	1	1	1	1	1	259991	1	314888	CPD-12170	CPD-12170 [ C20H37O3, tgt= ]			(311.26788, 2886.02)(348.2733, 15694.56)(349.2765, 1844.9668)	12.8963
sumatrol	1	1	1	1	1	1	1	1	1	1	514586	1	1	1	1	1	1	672722	1	1	CPD-12172	CPD-12172 [ C23H22O7, tgt= ]			(410.1647, 31261.195)(411.1671, 3654.3)	13.379
(<i>R</i>)-methylmalonate-semialdehyde	346546	298915	301003	308450	314579	277845	285404	280690	386283	349993	242910	283913	287823	334884	376198	277306	316396	269529	290638	267211	CPD-12177	CPD-12177 [ C4 H5 O3, tgt=34.70, overall=34.70 ]			(107.04442, 15146.053)(128.4736, 535124.06)(128.19179, 234943.23)(129.02232, 196917.6)(110.00951, 344893.12)	1.405
<i>N</i>-phenylsuccinimide	1254183	1622252	338970	1198337	837953	784897	3090669	1097543	540640	515991	3995520	1042881	433050	464339	1594159	89022	2338201	3571725	3562036	705298	CPD-12182	CPD-12182 [ C10 H9 N O2, tgt=44.31, overall=44.31 ]			(176.24896, 7221.9683)(177.0707, 8382.76)(159.19878, 3790.7014)(176.20428, 15900.969)(160.20969, 426.94)(178.36334, 7434.233)(178.2988, 1418.038)(198.90305, 1619.4377)(181.71628, 1454.6428)(182.05264, 1635.685)	2.9584
demethoxycurcumin	1	1	1	1	1	1	2892498	1	1	1	2819949	1	1	1	1	1	1604181	1880066	3186157	1	CPD-12187	CPD-12187 [ C20H18O5, tgt= ]			(358.36536, 11574.67)(359.16675, 691.42334)(338.13104, 77347.266)(339.13348, 5160.2295)(340.1283, 380.68665)	14.348
bisdemethoxycurcumin	1	1	1	1	1	1	451447	1	205905	1125701	1	216056	1	156713	3743541	148859	2943990	1	770111	83683	CPD-12188	CPD-12188 [ C19 H16 O4, tgt=50.79, overall=50.79 ]			(311.11176, 1628.7949)(291.09808, 11974.95)(294.50275, 17524.838)(293.1018, 748.84)(295.1024, 27288.06)(291.9006, 253463.45)(292.90363, 30929.709)(293.1046, 3523.21)(312.1339, 896.17)(313.3039, 10529.48)(314.0835, 3894.19)	7.2482
gondoate	1	1	1	1	1	1	1298584	1	1	1	2990394	1	1	630589	536872	1	1	1572834	1	1	CPD-12189	CPD-12189 [ C20 H37 O2, tgt= ]			(291.26822, 16405.186)(295.62308, 104913.54)(296.96408, 119838.71)(297.2985, 57908.59)(330.3223, 6525.6143)(328.3154, 109.09)(309.2982, 37867.395)(310.30133, 2234.7634)(316.9387, 18083.482)(319.2799, 5155.45)	15.1907
auricolate	227799	1	1	293846	179126	1	211616	321107	1	255608	513335	221746	218514	349727	420394	1	1	222803	264811	1	CPD-12191	CPD-12191 [ C22 H39 O3, tgt=57.08, overall=57.08 ]			(355.2988, 4578.607)(356.30234, 870.4733)(337.28757, 1236.02)(338.2912, 314.7)(351.3122, 11973.75)(352.31512, 1092.5378)(353.32684, 235.225)	9.48933
densipolate	815354	765958	1	958206	699757	633921	541166	1088939	1076798	739113	559425	778545	1309646	547521	730326	417427	620632	814882	336472	929444	CPD-12192	CPD-12192 [ C18 H31 O3, tgt=77.92, overall=77.92 ]			(295.22705, 18924.164)(296.22974, 2511.795)(277.21683, 26274.441)(278.22003, 3827.4849)(295.92093, 13662.406)(297.26114, 3041.65)(304.2259, 935.3)	14.7543
ricinoleate	1	1	397003	273833	244406	1	1	303463	306508	1	1513039	1	349929	201406	194109	1	2725258	1550685	1766577	340420	CPD-12193	CPD-12193 [ C18 H33 O3, tgt=72.44, overall=72.44 ]			(279.23242, 15278.031)(280.2356, 1291.8108)(297.2621, 21423.082)(298.2738, 1478.8201)(324.23596, 348.84497)(306.48227, 7831.1636)(306.99246, 6772.032)(307.2436, 2828.35)	16.171
1-phenyl-7-(3,4-dihydroxyphenyl)-hepta-1,3-dien-5-one	553145	447677	476687	523034	464519	467707	214113	506194	554716	540394	1	450880	580362	445522	645428	632763	1	1	1	525761	CPD-12202	CPD-12202 [ C19 H18 O3, tgt=59.31, overall=59.31 ]			(317.11542, 13108.256)(318.11868, 621.9862)	17.606
lachnanthocarpone	608485	157792	319053	344074	145590	264449	162773	316174	422890	728409	284065	307093	298424	245340	859209	222368	326756	163273	279514	280702	CPD-12203	CPD-12203 [ C19 H12 O3, tgt=72.98, overall=72.98 ]			(290.37714, 1981.7334)(290.27835, 5318.28)(291.08472, 5069.48)(273.08173, 705.777)(289.59167, 5425.2075)(273.08267, 16666.76)(274.0835, 3529.224)(306.1124, 980.5833)(312.0709, 203.58)(293.06427, 14459.272)(294.07318, 681.054)	2.6479
4-[(4E,6E)-3-oxo-7-phenylhepta-4,6-dien-1-yl]cyclohexa-3,5-diene-1,2-dione	1	1	1	1	1	1	1	1	1	1	263529	1	1	1	1	1	386074	209129	1	1	CPD-12204	CPD-12204 [ C19H16O3, tgt= ]			(293.11563, 17024.537)(294.1202, 299.02)(277.1075, 1942.81)(293.13214, 2267.1)	7.438
(4E,6E)-1-(4-hydroxyphenyl)-7-phenylhepta-4,6-dien-3-one	639885	445805	406950	372336	394476	353620	615331	396603	570603	1	339163	598531	566614	377521	788907	410462	410578	409700	1	457261	CPD-12205	CPD-12205 [ C19 H18 O2, tgt=8.79, overall=8.79 ]			(261.1301, 3488.97)(261.3995, 3465.835)(280.2807, 6939.5522)(281.66132, 1314.6676)(301.12643, 8589.211)(302.1297, 420.42)(284.11096, 1988.4475)	2.896
(1E,6E)-1-(4-hydroxyphenyl)-7-phenylhepta-1,6-diene-3,5-dione	542940	1	1	1	1	1	671137	1	1	132633	263529	1	1	1	778394	218442	386074	209129	304496	1	CPD-12207	CPD-12207 [ C19 H16 O3, tgt=14.41, overall=14.41 ]			(293.4033, 9289.557)(294.1202, 299.02)(275.8551, 4918.675)(294.1184, 890.42)(275.11118, 9027.944)(276.1092, 2971.68)(314.1603, 4262.34)(293.13214, 2267.1)(315.769, 7188.11)(316.1091, 891.51495)	4.6996
4-coumaroyl-diketide	103668	1	1	1	1	1	1	1	90469	1	1	1	1	96308	93140	1	1	1	1	1	CPD-12208	CPD-12208 [ C11 H9 O4, tgt=13.71, overall=13.71 ]			(205.04596, 2104.24)(190.05103, 910.69)(206.05295, 4903.5874)	4.60993
methoxyanigorufone	1	1	1	1	1	1	524526	1	1	317124	329970	1532833	1	1	413357	1	1	314372	1	1	CPD-12209	CPD-12209 [ C20H14O2, tgt= ]			(286.1069, 12365.651)(287.11426, 2892.1702)(287.11105, 5845.3867)(304.13986, 1660.505)(309.096, 4142.5703)(291.0858, 3615.06)	5.967
tricoumaroyl spermidine	88800	164616	106230	97989	186655	166042	401812	106108	148290	254926	132993	1	120964	248932	148771	151335	378694	227496	299728	178017	CPD-12212	CPD-12212 [ C34 H37 N3 O6, tgt=1.43, overall=1.43 ]			(584.0742, 1259.126)(565.51404, 1715.2384)(569.2617, 1340.84)(586.2815, 3654.785)(566.272, 5002.036)(606.66846, 928.66943)(607.32074, 4883.8315)(585.73505, 1436.8478)(587.3024, 2566.6716)	7.916
tricaffeoyl spermidine	289082	1	459769	228763	1	1	1	461403	1	1	1	402826	372615	1	144352	125629	1	1	1	1	CPD-12213	CPD-12213 [ C34 H37 N3 O9, tgt=18.76, overall=18.76 ]			(649.2691, 16724.623)(650.27216, 3731.4395)	5.829
triferuloyl spermidine	144761	306174	121954	82415	375753	164341	341441	169462	175975	118198	399462	340964	223381	533933	147542	178575	174619	367847	421524	417789	CPD-12214	CPD-12214 [ C37 H43 N3 O9, tgt=50.53, overall=50.53 ]			(659.43854, 65361.508)(659.68805, 34714.24)(660.8911, 106549.0)(660.2944, 154732.02)(661.2962, 35504.69)(691.42413, 3878.4807)(692.33575, 991.7)(696.5026, 10981.338)(697.50745, 3706.125)(699.2962, 421.86)(683.0925, 4550.2666)(683.79785, 4938.334)	13.0014
coumaryl acetate	221272	127514	268117	164071	1	446982	167556	226750	233888	223945	1	1	237978	498414	203186	214767	1	1	1	1	CPD-12215	CPD-12215 [ C11 H12 O3, tgt=47.46, overall=47.46 ]			(176.07123, 12054.612)(177.07141, 9567.092)(195.49477, 2359.5442)(180.08911, 1723.6991)(210.11316, 11075.755)(217.0735, 910.01)(199.05846, 5218.8594)	3.92025
phenylethylbenzoate	177370	1	95035	1	1	94857	1	150776	1	1	1	1	1	1	1	112766	303428	1	303745	84528	CPD-12217	CPD-12217 [ C15 H14 O2, tgt=36.04, overall=36.04 ]			(249.09035, 9449.577)(209.0935, 527.38)(233.2074, 1848.605)	4.00812
3-hydroxy-3-phenylpropanoate	1	1	1	1	545639	1	1136052	1	1	1	639478	2957689	1	1	1	1	1058338	787314	995523	1	CPD-12218	CPD-12218 [ C9H9O3, tgt= ]			(165.05533, 30623.674)(166.05867, 1081.802)(147.04369, 6653.644)(167.3976, 962.45337)(150.05713, 11646.889)(152.0584, 35830.93)(183.08499, 10135.226)(184.0852, 1453.6)(166.08313, 7857.9175)(168.08844, 447.975)	2.116
&alpha;-fenchene	1	527197	1	1	1	1	1	1	423632	1	1	1	1	1	552927	1	1	300318	370884	1	CPD-12222	CPD-12222 [ C10H16, tgt= ]			(137.132, 2543.54)(137.13303, 1211.8676)(154.15956, 23995.74)(155.16254, 1716.5101)	4.323
&beta;-fenchene	1	1	1	1	1	1	1	1	1	1	266813	1	1	1	1	1	228512	1	188467	1	CPD-12223	CPD-12223 [ C12 H20, tgt= ]			(165.16437, 9828.196)(182.19073, 1364.4332)	18.452
&alpha;-fenchocamphorone	1	1	1	1	1	1	1	1	1	1	509758	1	1	1	1	1	438433	145459	91974	1	CPD-12224	CPD-12224 [ C9 H14 O, tgt= ]			(142.12308, 6684.0225)(121.10172, 3066.5947)(156.13882, 9379.035)	17.847
&beta;-fenchocamphorone	356065	418351	257697	310099	232624	268415	229762	283188	373821	502599	1272562	408640	361715	282071	490815	268892	1218933	854195	1013285	235451	CPD-12225	CPD-12225 [ C11 H18 O, tgt=48.59, overall=48.59 ]			(166.13374, 1224.18)(168.34787, 4964.116)(149.13301, 4969.0156)(184.17018, 20617.934)(185.17354, 882.77)(189.12808, 22267.012)(190.13132, 1705.5966)(174.12292, 11583.03)	9.327
hordatine A	1080402	559535	948477	499540	392434	900939	1073337	970553	1	1203465	381760	543835	145236	1192430	1671827	1	439370	542472	720238	1107674	CPD-12232	CPD-12232 [ C28 H40 N8 O4, tgt=47.62, overall=47.62 ]			(535.17206, 21071.418)(536.0476, 4936.804)(539.3078, 886.33)(537.53735, 6541.8994)(536.9712, 3644.8767)(539.31, 123.32)(574.62, 440.01373)(575.3587, 963.82996)(552.3372, 7683.39)(557.7962, 1342.3262)(562.3251, 656.91)	8.76422
feruloylagmatine	1	1	1	1	1	1	615415	1	1	319261	456773	1	163713	1	261719	1	1488234	362032	982706	1	CPD-12236	CPD-12236 [ C15 H23 N4 O3, tgt= ]			(307.17587, 24370.676)(308.17972, 3115.5256)(289.16245, 2694.8425)(291.1837, 1407.73)(331.17252, 8838.494)(313.163, 945.18)	4.28533
serinol phosphate	735173	473521	874098	782836	113705	830090	3663271	608283	1272641	1129569	3068657	841127	589451	628410	875387	705953	2967074	3411136	3674239	531950	CPD-12266	CPD-12266 [ C3 H9 N O5 P, tgt=46.29, overall=46.29 ]			(171.82764, 4150.212)(174.0286, 821.70996)(175.0373, 2261.06)(154.35027, 1063.2534)(171.02823, 42268.55)(172.03, 3188.8442)(173.0236, 448.47)(191.18994, 2182.7712)(171.14888, 943.786)(194.29935, 1298.4143)(178.0099, 987.71)	2.164
12-hydroxylaurate	1	1	1	1	1	1	117194	1	1	158598	1	1	1	1	1	1	1	1	1	1	CPD-12282	CPD-12282 [ C12 H23 O3, tgt= ]			(239.16415, 1369.515)(203.1795, 6294.65)(219.1752, 1973.18)	14.221
11-hydroxydodecanoate	1	1	1	1	1	1	117194	1	1	158598	1	1	1	1	1	1	1	1	1	1	CPD-12299	CPD-12299 [ C12 H23 O3, tgt= ]			(239.16415, 1369.515)(203.1795, 6294.65)(219.1752, 1973.18)	14.221
15-<i>cis</i>-phytoene	1	1	1	1	1	1	136226	1	1	1	409693	1	1	1	1	1	306685	176309	214290	1	CPD-12321	CPD-12321 [ C40H64, tgt= ]			(547.5205, 69712.29)(548.52356, 25738.246)(549.52625, 4331.132)(550.5286, 554.24)(562.5294, 13339.211)(570.5048, 15334.314)(571.5067, 8413.736)(572.49445, 2839.9578)(573.4971, 1212.435)	18.465
3-phenylpropionaldoxime	882006	651724	1	1	1	1	915948	1	1	791467	895714	834698	893495	1	984513	1	674571	644276	756697	1	CPD-12328	CPD-12328 [ C9 H11 N O, tgt=79.27, overall=79.27 ]			(132.08144, 39135.773)(133.08499, 2642.4255)(157.076, 2445.68)	4.226
methyl gibberellin A<sub>9</sub>	1	1	1	1	1	161793	1	1	1	250289	1	1	259733	1	498996	157628	1	1	109517	1	CPD-12331	CPD-12331 [ C20 H26 O4, tgt=51.13, overall=51.13 ]			(330.1738, 2407.616)(315.1803, 236.09)(354.3423, 5583.35)(355.3408, 20372.312)(356.51413, 5340.4185)(357.5233, 6286.522)(358.19223, 848.2625)	6.243
methyl gibberellin A<sub>4</sub>	2331939	5389980	3059162	1326283	11619642	913193	1427222	2621786	3234293	2572315	1339976	3117327	4004595	1319502	1456804	1362942	499748	1337884	724251	4457952	CPD-12332	CPD-12332 [ C20 H26 O5, tgt=72.30, overall=72.30 ]			(331.1734, 2467.29)(364.21274, 22456.434)(365.2155, 4485.229)(346.20175, 9509.39)(347.20312, 1105.6029)(371.3761, 4853.746)(373.18384, 11538.656)(374.18793, 1387.5349)(354.93628, 5285.332)(355.9395, 662.25653)(355.17267, 10176.39)(356.1772, 867.68506)	9.04015
methyl gibberellin A<sub>20</sub>	1	1	1	1	1	1	1427222	1	1	1	1339976	1	1	1	1	1	1	1337884	1	1	CPD-12333	CPD-12333 [ C20H26O5, tgt= ]			(364.21548, 32770.84)(365.21875, 5904.127)	18.515
methyl gibberellin A<sub>34</sub>	210989	1	176567	242188	1	193838	103089	228474	191343	203618	124788	137037	1	1	196017	205200	103081	88925	105974	1	CPD-12350	CPD-12350 [ C20 H26 O6, tgt=56.62, overall=56.62 ]			(362.38986, 4936.746)(363.16852, 1470.9655)(363.18478, 1254.8689)(382.22357, 3428.66)(365.60602, 1142.172)(389.17413, 6152.175)(390.17773, 1849.02)	8.266
16&alpha;,17-epoxy gibberellin A<sub>4</sub>	1	361334	1	1	163862	1	439661	1	1	1	468218	549551	1	1	1	1	1	303409	522673	1	CPD-12351	CPD-12351 [ C19 H23 O6, tgt=19.02, overall=19.02 ]			(371.65115, 2299.0251)(330.14197, 16817.275)(331.143, 2443.3567)(348.6715, 10160.665)(349.17276, 1606.89)	10.9469
16&alpha;, 17-epoxy gibberellin A<sub>12</sub>	1	1	1	1	1	1	1427222	1	1	1	1339976	1	1	1	1	1	1	1337884	1	1	CPD-12353	CPD-12353 [ C20H26O5, tgt= ]			(364.21548, 32770.84)(365.21875, 5904.127)	18.515
16&alpha;, 17-epoxy gibberellin A<sub>9</sub>	1	1	1	1	1	1	184868	1	1	1	236489	1	1	1	1	1	1	1	190495	1	CPD-12354	CPD-12354 [ C19H23O5, tgt= ]			(315.1417, 4683.955)(317.1568, 34066.02)(318.16, 3234.52)(331.1724, 7604.237)(357.15216, 3885.745)(339.14148, 1547.73)	4.825
16,17-dihydro-16&alpha;,17-dihydroxy gibberellin A<sub>4</sub>	221084	1	178033	173771	1	169196	808040	172303	206285	223765	270173	153388	203597	227993	233597	207729	351200	271320	378766	1	CPD-12355	CPD-12355 [ C19 H25 O7, tgt=12.47, overall=12.47 ]			(367.1759, 253.9)(367.37836, 8659.588)(383.20456, 13083.354)(384.2075, 1547.6666)(367.6089, 8066.6616)(367.1823, 348.2)	17.321
16,17-dihydro-16&alpha;,17-dihydroxy gibberellin A<sub>12</sub>	2483212	6211827	3215135	1558765	11890509	1074656	490896	2756193	3346087	2750308	706861	3273204	4798938	1534556	1830777	1578591	658683	971260	857551	5008388	CPD-12360	CPD-12360 [ C20 H28 O6, tgt=72.78, overall=72.78 ]			(367.2091, 627.19495)(382.2226, 9178.447)(383.22418, 1736.77)(364.21204, 20765.006)(365.21436, 4189.1724)(389.0369, 14040.68)(389.18457, 4809.3164)(372.84933, 172.22333)(373.1827, 32.72)	9.192
16, 17-dihydro-16&alpha;, 17-dihydroxy gibberellin A<sub>9</sub>	235425	109959	134116	204079	86953	166585	185782	192334	222657	251646	1	192370	1	275371	234148	190929	168659	1	1	132985	CPD-12362	CPD-12362 [ C19 H25 O6, tgt=34.00, overall=34.00 ]			(350.17657, 10914.695)(351.17804, 1813.965)(358.38773, 40694.01)(359.16714, 3263.3584)	14.521
8-oxo-GMP	844249	214258	132815	133453	175928	213829	1	170565	185054	1307523	1	153005	743476	196221	857543	173343	2793526	1	1905401	290032	CPD-12367	CPD-12367 [ C10 H12 N5 O9 P, tgt=55.81, overall=55.81 ]			(377.0475, 2245.05)(362.0348, 665.21747)(363.04352, 278.16)(364.70667, 1284.8267)(365.0403, 5000.34)(395.06647, 22465.494)(396.06863, 3859.825)(397.0645, 824.9722)(377.6274, 23311.918)(382.08115, 19060.71)(387.018, 675.6)	2.04265
9'-<i>cis</i>-neurosporene	1	1	1	1	1	1	320856	1	1	1	1738702	1	1	1	1	1	1175611	488373	662004	1	CPD-12368	CPD-12368 [ C40 H58, tgt= ]			(538.4621, 6899.7617)(539.4647, 1737.3351)(556.49164, 23372.031)(557.49445, 3702.2122)	17.683
7',9'-<i>cis</i>-lycopene	1	1	1	1	1	1	742499	1	1	1	3410837	1	1	1	1	1	2209628	1021608	1326011	1	CPD-12371	CPD-12371 [ C40 H56, tgt= ]			(538.46204, 6194.3857)(539.4647, 1643.5675)(555.48865, 71281.086)(556.49164, 26199.639)(557.49445, 4159.5776)	17.694
8-oxo-deoxyguanosine	424420	321922	449896	473622	362413	476733	371501	528916	432281	334445	319857	406337	485192	537236	540754	525949	407596	361537	344572	540901	CPD-12381	CPD-12381 [ C10 H13 N5 O5, tgt=79.40, overall=79.40 ]			(284.09952, 19673.375)(285.10245, 1316.902)(270.0842, 1193.19)(287.1115, 2713.09)(267.09796, 11703.414)(270.10495, 9308.695)(301.1265, 17598.07)(302.1297, 686.69)(307.08405, 27184.05)(308.08405, 3524.8625)(291.0845, 5002.7056)	2.128
1-<i>aci</i>-nitro-2-phenylethane	564537	675880	4138888	1364790	481484	478543	199315	214363	5800485	771072	305814	306470	486600	4699393	792392	1677350	118336	305761	194707	668017	CPD-12383	CPD-12383 [ C8 H9 N O2, tgt=63.33, overall=63.33 ]			(151.92188, 8374.847)(156.0776, 1417.87)(134.78485, 4515.1777)(136.0635, 127153.02)(137.0651, 9072.7)(155.15482, 5653.1016)(153.0647, 855.54)(135.77654, 51967.41)(137.06499, 5928.4897)(174.11343, 2700.8054)(151.0821, 133.23)(175.06004, 2132.6367)(156.7826, 39759.824)(157.37508, 4856.433)(158.04129, 11181.641)	1.878
(<i>Z</i>)-1-(glutathion-<i>S</i>-yl)-<i>N</i>-hydroxy-2-phenylethan-1-imine	3556753	3053411	3306633	3116983	3375680	3072528	10463990	2809671	3620431	3496069	1	3636965	3091330	2813655	3139419	3330163	10212413	9536978	10383028	3095902	CPD-12384	CPD-12384 [ C18 H23 N4 O7 S, tgt=85.45, overall=85.45 ]			(423.1069, 1433.59)(427.13858, 2652.17)(457.16022, 187429.8)(458.16302, 31329.447)(459.1648, 6745.5044)	8.584
(<i>Z</i>)-1-(L-cysteinyglycin-<i>S</i>-yl)-<i>N</i>-hydroxy-2-phenylethan-1-imine	157679	1	1	1	1	1	207433	1	1	271233	207367	1	228179	1	237188	1	230658	176962	194832	1	CPD-12385	CPD-12385 [ C13 H17 N3 O4 S, tgt=52.21, overall=52.21 ]			(298.0976, 58645.277)(299.10022, 7271.358)(300.0959, 2483.4387)(329.12122, 7635.262)(317.11987, 1902.9137)(339.08395, 1768.9668)	3.574
1-(1<i>H</i>-indol-3-yl)-2-<i>aci</i>-nitroethane	178179	210464	159473	1	1	1	281298	1	200851	195126	279308	266523	281385	159095	292348	141683	172962	195823	1	1	CPD-12386	CPD-12386 [ C10 H10 N2 O2, tgt=38.09, overall=38.09 ]			(190.07695, 13930.258)(174.0655, 9866.099)(196.0946, 268.63)(173.066, 4584.979)(174.06982, 492.08)(196.05264, 991.49)	2.99075
(<i>E</i>)-1-(glutathion-<i>S</i>-yl)-<i>N</i>-hydroxy-2-(1<i>H</i>-indol-3-yl)ethan-1-imine	1	1	1	1	1	1	422474	1	1	1	285097	1	1	1	1	1	1	172701	1	1	CPD-12387	CPD-12387 [ C20 H24 N5 O7 S, tgt= ]			(496.18616, 17830.967)(497.18896, 2837.1533)	7.536
(<i>E</i>)-1-(L-cysteinylglycin-<i>S</i>-yl)-<i>N</i>-hydroxy-2-(1<i>H</i>-indol-3-yl)ethan-1-imine	308502	1	269404	1	1	271540	1	309301	409862	339560	1	1	290735	551515	255332	306502	1	1	1	1	CPD-12388	CPD-12388 [ C15 H18 N4 O4 S, tgt=57.71, overall=57.71 ]			(350.13, 19322.273)(351.1302, 2095.6208)	7.861
1-(methylsulfanyl)-4-<i>aci</i>-nitrobutane	358213	7674356	7571253	422886	1	7694546	152255	482500	8412629	210178	4113116	5223740	8621533	7822431	445522	7601138	5906728	4188432	143571	386522	CPD-12389	CPD-12389 [ C5 H11 N O2 S, tgt=62.26, overall=62.26 ]			(133.03268, 3177.0466)(150.05685, 95779.23)(151.05919, 12737.318)(134.22905, 3763.4937)(135.92131, 6164.545)(137.04659, 4769.9834)(168.87498, 11452.292)(170.33514, 1562.8425)(150.1774, 21799.652)(152.06944, 13547.064)(153.07071, 920.89)(175.03609, 2017.9667)(159.02919, 6530.2944)	2.445
(<i>E</i>)-1-(glutathion-<i>S</i>-yl)-<i>N</i>-hydroxy-&omega;-(methylsulfanyl)butan-1-imine	3745744	3058522	4765025	4356505	2298856	1804393	460858	2247745	1	6487295	613642	1161505	5136334	1779298	4666422	3100674	319775	353060	383751	1563307	CPD-12390	CPD-12390 [ C15 H25 N4 O7 S2, tgt=65.12, overall=65.12 ]			(455.15292, 109425.2)(456.15567, 20238.842)(457.15326, 5151.196)(458.15884, 1471.435)	3.841
(<i>E</i>)-1-(L-cysteinylglycin-<i>S</i>-yl)-<i>N</i>-hydroxy-&omega;-(methylsulfanyl)butan-1-imine	378542	282157	298584	340269	228126	351164	302602	248256	371258	482972	785838	255529	324654	454228	256120	449233	1	84373	157772	156615	CPD-12391	CPD-12391 [ C10 H19 N3 O4 S2, tgt=43.73, overall=43.73 ]			(309.2288, 5284.776)(310.07278, 648.897)(293.06442, 8526.373)(295.66766, 867.702)(295.0737, 795.07)(296.0675, 23762.52)(297.0708, 1067.39)(310.66202, 2667.1113)(328.12555, 2768.2441)(310.1146, 133.06)(332.2262, 5397.254)(337.0638, 26825.0)(338.0655, 6666.12)(317.41327, 44624.605)(318.0636, 3020.2744)	5.914
1-(methylsulfanyl)-5-<i>aci</i>-nitropentane	1	1	1	1	1	1	5250745	1	1	1	4035485	1	4852790	1	1	1	886953	4419896	527642	1	CPD-12392	CPD-12392 [ C6H13NO2S, tgt= ]			(166.0692, 555.975)(168.064, 1037.73)(146.0604, 1651.335)(150.0567, 35972.945)(164.07426, 4479.1245)(166.0874, 98774.18)(167.0907, 8800.86)(168.0882, 79.34)(187.06055, 3795.5947)(169.05226, 45967.383)	1.406
(<i>E</i>)-1-(glutathion-<i>S</i>-yl)-<i>N</i>-hydroxy-&omega;-(methylsulfanyl)pentan-1-imine	949758	1040990	871808	1	576905	565813	166578	676831	904407	177825	155569	1	1	638175	266085	653852	238070	1	231269	547825	CPD-12393	CPD-12393 [ C16 H27 N4 O7 S2, tgt=49.90, overall=49.90 ]			(455.13397, 1255.115)(435.12457, 2391.395)(436.1273, 285.5)(439.128, 157.85)(435.12756, 7763.9727)(436.13074, 1234.6913)(439.1308, 413.8414)(469.16998, 6241.6426)(470.17148, 1065.58)(451.66104, 5191.467)	7.27853
(<i>E</i>)-1-(L-cysteinylglycin-<i>S</i>-yl)-<i>N</i>-hydroxy-&omega;-(methylsulfanyl)pentan-1-imine	139820	1	1	1	1	1	1	1	106822	213358	239781	114818	109543	138965	214869	1	1	217143	1	1	CPD-12394	CPD-12394 [ C11 H21 N3 O4 S2, tgt=30.20, overall=30.20 ]			(325.1144, 1486.23)(309.0958, 2302.9514)(347.13147, 7151.926)(325.7821, 7719.507)	3.634
1-(methylsulfanyl)-6-<i>aci</i>-nitrohexane	194953	917127	183802	183631	1195696	155333	927151	192684	191362	1829990	2295930	187658	271714	2429770	619167	271310	2663048	1427573	7669215	156964	CPD-12395	CPD-12395 [ C7 H15 N O2 S, tgt=39.60, overall=39.60 ]			(201.07408, 72331.984)(203.0766, 427.09998)(160.07622, 47660.504)(161.07925, 6226.0845)(181.78311, 17545.543)(196.11916, 4077.4602)(179.93109, 4110.077)(180.0911, 4706.9404)(185.2759, 4914.419)(186.39604, 2846.96)(177.3523, 5144.4956)(178.1068, 348.38)	3.0568
(<i>E</i>)-1-(glutathion-<i>S</i>-yl)-<i>N</i>-hydroxy-&omega;-(methylsulfanyl)hexan-1-imine	821209	298240	810440	796996	136815	436348	339359	372038	97969	345058	135774	183073	95292	303709	308185	595522	339523	147631	89139	113287	CPD-12396	CPD-12396 [ C17 H29 N4 O7 S2, tgt=17.69, overall=17.69 ]			(470.03354, 8911.252)(470.13797, 6760.7397)(470.1358, 4588.55)(450.89252, 1322.04)(469.1672, 4886.28)(471.1532, 4189.02)(452.64056, 1451.405)(465.17276, 8340.662)(466.17688, 2466.86)(471.63043, 6634.442)(472.1301, 1205.51)	4.55485
(<i>E</i>)-1-(L-cysteinylglycin-<i>S</i>-yl)-<i>N</i>-hydroxy-&omega;-(methylsulfanyl)hexan-1-imine	1	1	1	1	1	1	607133	1	1	1	395689	1	1	1	1	1	387781	339200	2982826	1	CPD-12397	CPD-12397 [ C12 H23 N3 O4 S2, tgt=35.08, overall=35.08 ]			(355.38727, 15829.848)(356.39273, 4082.1147)(342.13522, 27502.926)(339.1343, 6535.25)(340.1294, 346.32)	5.26336
1-(methylsulfanyl)-7-<i>aci</i>-nitroheptane	122025	110991	1	177357	1	1	114098	110758	1	1	146519	1	282713	1	240879	1	134234	1	127866	1	CPD-12398	CPD-12398 [ C8 H17 N O2 S, tgt=46.77, overall=46.77 ]			(191.10223, 12149.734)(175.0887, 798.44)(176.0969, 224.73)(194.11795, 6083.541)(214.08623, 7492.7085)	5.85835
(<i>E</i>)-1-(glutathion-<i>S</i>-yl)-<i>N</i>-hydroxy-&omega;-(methylsulfanyl)heptan-1-imine	644547	738267	1	691021	438730	349893	1	440717	692605	986375	1	715181	898867	364148	1147185	394416	1	1	1	1	CPD-12399	CPD-12399 [ C18 H31 N4 O7 S2, tgt=48.81, overall=48.81 ]			(479.1894, 19285.174)(480.19232, 2930.254)(481.20166, 457.5725)	8.345
(<i>E</i>)-1-(L-cysteinylglycin-<i>S</i>-yl)-<i>N</i>-hydroxy-&omega;-(methylsulfanyl)heptan-1-imine	390229	229982	191584	172265	253061	607805	462289	618669	336227	486956	534622	282433	648975	425887	838124	1750869	472906	329912	306874	312803	CPD-12400	CPD-12400 [ C13 H25 N3 O4 S2, tgt=61.71, overall=61.71 ]			(357.11685, 728.765)(334.2306, 5078.0923)(355.13663, 10103.018)(356.1398, 1156.4976)(335.12817, 2252.766)(369.75555, 7855.1416)(370.1694, 153.615)(352.0165, 1333.6946)(375.1269, 3844.5398)(378.1168, 740.65)(356.2187, 14143.171)(357.1098, 3743.6797)	5.1679
(<i>E</i>)-1-(glutathion-<i>S</i>-yl)-<i>N</i>-hydroxy-&omega;-(methylsulfanyl)octan-1-imine	319278	316442	182525	238311	1	241975	1918195	196747	281498	338803	1179612	270922	252066	1	1	229007	436372	732090	306319	138061	CPD-12402	CPD-12402 [ C19 H33 N4 O7 S2, tgt=37.79, overall=37.79 ]			(517.1792, 2319.9448)(516.8894, 7165.059)(517.2212, 1580.5149)(495.18387, 25684.285)(496.18683, 5006.2876)(497.84573, 1782.9233)	6.78
(<i>E</i>)-1-(L-cysteinylglycin-<i>S</i>-yl)-<i>N</i>-hydroxy-&omega;-(methylsulfanyl)octan-1-imine	199282	169824	174103	162857	1	144882	205503	178216	151036	206003	140560	154537	170045	172498	230577	159254	141214	344942	1	111858	CPD-12403	CPD-12403 [ C14 H27 N3 O4 S2, tgt=46.26, overall=46.26 ]			(366.4705, 5914.313)(347.1313, 9897.686)(369.15192, 1953.065)(389.17044, 4473.6084)(371.16776, 25156.96)(375.12695, 2301.1133)	3.726
1-(methylsulfanyl)-9-<i>aci</i>-nitrononane	1	186438	1	1	1	1	1	1	1	1	1	156397	1	1	1	1	189012	1	1	1	CPD-12404	CPD-12404 [ C10 H21 N O2 S, tgt=26.16, overall=26.16 ]			(219.13423, 9050.44)(220.15393, 1975.6901)	2.94
(<i>E</i>)-1-(glutathion-<i>S</i>-yl)-<i>N</i>-hydroxy-&omega;-(methylsulfanyl)nonan-1-imine	2617135	278106	2433230	775566	611013	1	1	1	1466315	212049	1	911444	1	1	1964290	96691	1	1	1	1	CPD-12405	CPD-12405 [ C20 H35 N4 O7 S2, tgt=38.71, overall=38.71 ]			(508.31287, 7301.13)(512.1831, 4334.1797)(489.1938, 131.99)(513.1943, 434.31)(491.2076, 8352.67)(525.2315, 3206.04)(508.54922, 4029.7249)(508.20807, 1510.995)(531.19794, 317.36667)(514.1581, 2047.51)	5.34
(<i>E</i>)-1-(L-cysteinylglycin-<i>S</i>-yl)-<i>N</i>-hydroxy-&omega;-(methylsulfanyl)nonan-1-imine	214214	238525	199911	181958	98357	193134	309018	181660	1	643004	293581	207686	195238	295146	218474	145856	1	106560	372665	100103	CPD-12406	CPD-12406 [ C15 H29 N3 O4 S2, tgt=32.80, overall=32.80 ]			(380.5582, 6083.4)(364.2105, 54297.098)(366.13995, 14195.055)(367.14243, 1034.606)(386.1666, 7568.34)(399.52866, 2882.8232)(403.15625, 8373.904)(385.6437, 3658.896)	10.6032
3-keto-&beta;-D-galactose	1	1	1	1	1	1	1	1	1	1	463391	1	1	1	1	1	1	519405	1	1	CPD-1242	CPD-1242 [ C6H10O6, tgt= ]			(164.04245, 4510.9697)(165.0549, 2915.7148)(182.08136, 17662.824)(183.08455, 1089.74)(184.03125, 1859.94)	3.138
4-sinapoyloxybutylglucosinolate	465503	87862	311146	375826	310324	278342	1	243051	321687	445227	1	208819	369412	362464	531190	473603	1	1	1	242229	CPD-12422	CPD-12422 [ C22 H30 N O14 S2, tgt=44.59, overall=44.59 ]			(614.1414, 22481.023)(615.14435, 4904.4146)(622.10345, 2914.5266)(624.08997, 551.975)(607.0937, 5566.4634)	9.34645
2-sinapoyloxy-3-butenylglucosinolate	191570	120238	141326	232625	1	157817	1	1	151364	188406	1	1	377308	114791	217280	1	1	1	1	343616	CPD-12423	CPD-12423 [ C22 H28 N O14 S2, tgt=31.36, overall=31.36 ]			(622.76654, 1977.4401)(624.0897, 287.55)(578.0799, 9158.242)(599.0881, 4790.87)(600.0902, 392.27)(599.0723, 7100.25)(600.063, 359.75)	12.0431
phlorizin	330824	1031252	318945	156416	2019449	222935	1155255	337484	398414	387473	1852991	175349	353206	552160	268937	327436	1514427	2514428	1384957	2565307	CPD-12447	CPD-12447 [ C21 H23 O10, tgt=74.51, overall=74.51 ]			(435.12778, 19569.643)(436.13095, 2994.45)(453.16727, 78344.94)(454.1702, 18447.889)	11.3938
stellariose	399508	301255	289952	319130	301086	276318	385269	326443	1	365801	343769	1	358714	319463	403523	1	440375	378989	369162	319208	CPD-12463	CPD-12463 [ C30 H52 O26, tgt=9.86, overall=9.86 ]			(846.2937, 9464.68)(847.2945, 7105.9404)	28.621
theophylline	1482169	1492335	2502503	2356255	1541502	3815649	4133254	1	743781	1	4034750	1	1	434640	1604435	2603093	3965624	3844017	2114188	1	CPD-12479	CPD-12479 [ C7 H8 N4 O2, tgt=80.11, overall=80.11 ]			(182.5694, 5973.46)(184.0742, 6594.25)(164.55682, 5327.762)(166.0656, 126.77)(184.0742, 195.93)(163.06143, 62866.547)(164.06493, 3481.2944)(200.1022, 1620.55)(180.08765, 5643.1953)(203.05408, 22813.766)(204.05653, 1090.52)(205.0488, 152.78)(188.04501, 1119.15)	7.33965
1,3,7-trimethylurate	1	146713	1	143897	196692	1	1	1	136325	145512	1	310062	1	130692	974041	126798	1	1	1	1	CPD-12480	CPD-12480 [ C8H10N4O3, tgt= ]			(211.57555, 497.72998)(193.0686, 2363.27)(193.87244, 1723.934)(229.1131, 652.13)(233.1133, 495.51)(233.06126, 435.69003)(217.2, 3075.4158)(216.0423, 1051.74)	1.799
petiveriin	2085075	3144302	2804850	2446737	1186253	1476293	417175	2284805	2884169	2239678	591149	1653168	2223410	2369764	1	2682574	1	324449	621622	1820013	CPD-12486	CPD-12486 [ C10 H13 N O3 S, tgt=55.41, overall=55.41 ]			(229.05635, 605.92004)(214.0485, 2985.78)(210.06183, 58825.707)(211.06459, 6116.4863)(212.06558, 476.75)(245.10025, 1997.0192)(227.58315, 9981.125)(228.08301, 815.255)(250.04715, 2953.536)(251.045, 6171.33)(233.04256, 1604.8972)(237.03682, 706.39197)	2.2741
petivericin	299533	110207	194280	185294	91187	206388	156914	163046	262682	389084	114655	329688	308236	338401	198228	167464	215786	152628	182749	92372	CPD-12487	CPD-12487 [ C14 H14 O S2, tgt=32.20, overall=32.20 ]			(262.4679, 1746.3107)(247.0437, 1781.21)(263.0537, 6175.5986)(264.07065, 1307.3)(247.54594, 14102.709)(249.51634, 32418.795)(250.51634, 6753.4614)(251.04338, 7198.1387)(282.08752, 5753.1367)(283.0877, 796.23334)(264.0726, 3588.72)(285.0395, 4164.123)(270.58508, 808.0819)(271.01706, 1212.2651)	1.408
(<i>Z</i>)-phenylmethanethial <i>S</i>-oxide	431815	1	2570254	1364790	1	1	1	1	463431	359783	1	1	392967	1630285	527512	1477881	1	1	1	1	CPD-12490	CPD-12490 [ C7 H6 O S, tgt=47.22, overall=47.22 ]			(143.0177, 454.79)(140.02756, 635.37)(143.0175, 817.81)(156.29395, 120440.84)(157.29283, 6233.1123)(158.0414, 11404.586)(140.17921, 1555.6144)(143.03754, 2090.884)(146.9957, 420.03)	2.187
phenylmethanesulfenate	1078866	973572	934017	126117	724210	773226	921143	200776	117584	1401614	188833	1092850	1161616	981947	1419177	972499	1008090	779133	860127	183560	CPD-12491	CPD-12491 [ C7 H8 O S, tgt=65.60, overall=65.60 ]			(140.65227, 2545.5046)(123.0205, 8735.42)(141.14, 6625.743)(127.02482, 1052986.8)(128.02615, 165830.39)(159.31854, 3589.373)(160.05573, 696.5687)(163.06055, 306.485)(140.9554, 33401.445)(142.65279, 3181.9058)(167.09848, 6573.1855)(168.0188, 1262.09)(145.179, 2277.3167)	1.409
3-epi-6-deoxocathasterone	1	1	1	1	1	1	109396	1	1	1	136898	1	1	1	1	1	1	1	1	1	CPD-12493	CPD-12493 [ C28H50O2, tgt= ]			(424.36218, 8352.5)(425.37006, 2886.545)	17.43
(22R,23R)-22,23-dihydroxycampesterol	73977928	120037184	121725216	133205400	123338280	134096384	80081024	75610672	138133856	137709744	77795968	125419656	135274112	142165296	55033104	138235616	73703128	97224272	82319376	124913600	CPD-12495	CPD-12495 [ C28 H48 O3, tgt=58.45, overall=58.45 ]			(414.33893, 423338.75)(415.3423, 120093.625)(416.35492, 2029427.2)(417.35855, 582555.06)(418.36127, 82881.64)(419.3637, 7810.6587)	8.618
(22R,23R)-22,23-dihydroxy-campest-4-en-3-one	717845	578884	1	732392	1	742592	1	1249894	674446	1374375	3285438	575666	1126057	1791329	1775725	744473	338286	511352	414769	488903	CPD-12496	CPD-12496 [ C28 H46 O3, tgt=76.13, overall=76.13 ]			(453.33264, 5372.7)(454.3359, 911.82)(414.33734, 11750.171)(415.80762, 237867.47)(416.81686, 397918.88)(417.81982, 102047.55)(418.5827, 20111.303)(419.36337, 3972.64)(431.8501, 13215.793)(433.60345, 3574.6226)(434.3607, 10640.11)(435.3638, 2841.68)(430.36987, 15020.492)(431.3721, 3009.7883)	12.778
7-oxatyphasterol	1321175	1	832275	1009962	824236	844537	263176	753401	1095315	542131	245905	1002894	684290	1179301	646448	826847	241113	782404	455863	1	CPD-12497	CPD-12497 [ C28 H48 O5, tgt=74.40, overall=74.40 ]			(469.3641, 4682.63)(470.3678, 1448.66)(447.3461, 3814.4937)(448.85468, 575.345)(469.36536, 63056.367)(471.18396, 4240.958)(471.37192, 1474.6234)(447.3455, 8247.213)(448.3502, 1087.1433)(493.3501, 1577.39)(469.4636, 9894.071)	23.959
7-oxateasterone	1321175	302407	832275	1009962	824236	844537	263176	753401	1095315	542131	245905	1002894	684290	1179301	646448	826847	241113	782404	455863	582731	CPD-12498	CPD-12498 [ C28 H48 O5, tgt=74.40, overall=74.40 ]			(493.3501, 1577.39)(447.34576, 10128.946)(448.3501, 1096.068)(469.3641, 4682.63)(470.3678, 1448.66)(469.36484, 60275.06)(471.0929, 4289.923)(471.37192, 1474.6234)(469.80197, 9547.766)	23.5255
26-hydroxycastasterone	428571	331240	347760	406431	527748	279734	1	249111	286421	378483	1	256057	560189	329637	429508	616675	1	1	1	536850	CPD-12500	CPD-12500 [ C28 H48 O6, tgt=64.28, overall=64.28 ]			(486.3569, 22549.479)(464.34366, 15096.25)(465.8459, 186.555)(483.37784, 93616.11)(484.38065, 15064.7)(507.33792, 387.0057)(486.5292, 1839.4816)	20.825
26-hydroxybrassinolide	3598192	2877384	4984050	2653575	1469026	4733427	1521060	4690347	3785708	5560718	1439629	2512504	4863738	4658422	7210001	2681810	1770639	1343162	1497907	1350137	CPD-12501	CPD-12501 [ C28 H48 O7, tgt=90.13, overall=90.13 ]			(496.3404, 68989.36)(497.34366, 16284.927)(498.34683, 2331.71)(519.3255, 3493.797)(520.3297, 588.9)	16.748
mizoribine 5'-monophosphate	1146848	597927	354917	451956	626533	220823	730289	393312	640685	1681628	383422	822231	1014077	95560	1088099	262446	269644	357323	448665	426361	CPD-12503	CPD-12503 [ C9 H12 N3 O9 P, tgt=41.74, overall=41.74 ]			(324.03766, 1192.05)(323.13705, 1477.067)(337.21368, 18423.592)(338.21472, 4697.018)(339.0615, 1436.4551)(362.87857, 829.65)(365.04126, 615.7343)	1.679
O(2),1,9-trimethylurate	1	146713	1	143897	196692	1	1	1	136325	145512	1	310062	1	130692	974041	126798	1	1	1	1	CPD-12507	CPD-12507 [ C8H10N4O3, tgt= ]			(211.57555, 497.72998)(193.0686, 2363.27)(193.87244, 1723.934)(229.1131, 652.13)(233.1133, 495.51)(233.06126, 435.69003)(217.2, 3075.4158)(216.0423, 1051.74)	1.799
1843U89	253519	1	1	1	1	1	2399184	1	1	1	2625421	1	1	1	124589	1	3137981	1439833	1483579	1	CPD-12510	CPD-12510 [ C27 H22 N4 O6, tgt=3.01, overall=3.01 ]			(501.17468, 823.66003)(499.03104, 29304.787)(499.17682, 9925.02)(500.1799, 817.07)	6.55237
UDP-&beta;-L-arabinofuranose	306449	189617	221394	374600	569417	263015	1	155021	204084	295643	1	206130	512172	132918	350423	570170	1	1	1	490209	CPD-12511	CPD-12511 [ C14 H20 N2 O16 P2, tgt=47.95, overall=47.95 ]			(536.04, 3459.1873)(537.0244, 1963.1447)(519.044, 16892.57)(520.309, 3143.076)(521.02985, 10733.392)(534.0538, 14724.672)	20.092
UDP-&beta;-L-arabinopyranose	306449	189617	221394	374600	569417	263015	1	155021	204084	295643	1	206130	512172	132918	350423	570170	1	1	1	490209	CPD-12513	CPD-12513 [ C14 H20 N2 O16 P2, tgt=47.95, overall=47.95 ]			(536.04, 3459.1873)(537.0244, 1963.1447)(519.044, 16892.57)(520.309, 3143.076)(521.02985, 10733.392)(534.0538, 14724.672)	20.092
&beta;-D-glucuronate	1072110	3470701	2030532	1924867	1341111	1085529	1	1904768	2322561	2176959	210993	1203725	1845603	1770153	1473890	2100664	1	1	247082	2116679	CPD-12521	CPD-12521 [ C6 H9 O7, tgt=75.53, overall=75.53 ]			(193.03517, 30365.055)(194.03827, 728.67096)(175.02307, 40205.4)(176.02585, 1085.2087)(177.0224, 1828.56)(198.056, 205.03)(211.06459, 8235.357)(212.06578, 563.2)(198.07486, 3690.0122)(216.1384, 17047.96)(219.02734, 55914.53)(220.03134, 2782.415)(198.01285, 355.55)	2.055
&alpha;-D-galacturonate	1072110	3470701	2030532	1924867	1341111	1085529	1	1904768	2322561	2176959	210993	1203725	1845603	1770153	1473890	2100664	1	1	247082	2116679	CPD-12523	CPD-12523 [ C6 H9 O7, tgt=75.53, overall=75.53 ]			(193.03517, 30365.055)(194.03827, 728.67096)(175.02307, 40205.4)(176.02585, 1085.2087)(177.0224, 1828.56)(198.056, 205.03)(211.06459, 8235.357)(212.06578, 563.2)(198.07486, 3690.0122)(216.1384, 17047.96)(219.02734, 55914.53)(220.03134, 2782.415)(198.01285, 355.55)	2.055
3'-azido-3'-deoxythymidine 5'-phosphate	1	1	101872	120594	1	114475	1	1	168923	139172	1	1	126888	113361	1	98252	1	1	1	1	CPD-12546	CPD-12546 [ C10 H12 N5 O7 P, tgt= ]			(346.0556, 545.72)(330.3713, 418.75668)(349.06235, 3161.2668)(351.0695, 9750.99)(332.5585, 1674.1533)(333.0592, 1898.26)(348.07104, 4919.2236)(350.0282, 6874.753)	1.894
(3<i>S</i>,6<i>E</i>)-nerolidol	1	1	1	1	1	1	1111171	1	1	1	2110130	1	1	1	1	1	2466537	1362949	1	1	CPD-12568	CPD-12568 [ C15H26O, tgt= ]			(226.2163, 1376.06)(240.23257, 45655.484)(241.23567, 5914.457)(249.20569, 1293.3575)	17.079
tricetin	235759	851310	1019724	1077117	1108182	931195	992722	953803	1334089	262866	841329	1023740	289745	1166183	1217385	904976	1066100	920937	1003477	838110	CPD-12570	CPD-12570 [ C15 H9 O7, tgt=47.61, overall=47.61 ]			(283.03165, 22612.762)(302.04184, 10267.91)(284.0354, 23809.06)(285.03912, 5137.4927)(323.07416, 1815.5889)(301.65436, 22329.422)(302.0568, 6716.703)(307.0144, 11388.97)(309.0264, 711.94)	1.404
3',4',5'-<i>O</i>-trimethyltricetin	324160	379541	329509	125360	138748	80616	565290	154501	345691	182720	436591	80354	167515	1	145781	257397	534760	281494	500961	144784	CPD-12573	CPD-12573 [ C18 H15 O7, tgt=28.70, overall=28.70 ]			(367.0732, 226.99)(365.1303, 458.68)(344.0912, 9023.711)(348.96167, 5570.314)(350.78387, 6008.0283)(352.70428, 1859.1852)(353.083, 4997.5933)	2.055
UDP-&alpha;-D-glucose	115171	1	1	141356	260754	94735	1	1	1	112888	1	1	237347	86622	124858	278122	1	1	1	208645	CPD-12575	CPD-12575 [ C15 H22 N2 O17 P2, tgt=46.16, overall=46.16 ]			(565.05634, 9097.831)(567.0456, 341.54)(550.04663, 12271.502)(551.59625, 1436.7222)(552.0339, 2775.5)(564.073, 1623.49)	20.025
<i>S</i>-(2<i>E</i>,6<i>E</i>)-farnesyl-L-cysteine	1	1	1	213409	236275	1	603775	1	1	1	484220	1155339	1174287	717922	1114006	328611	1	302250	298968	514216	CPD-12581	CPD-12581 [ C18H31NO2S, tgt= ]			(330.2029, 318.12)(307.45, 3539.4)(309.2023, 341.17)(332.2185, 6307.867)(325.23584, 22661.707)(326.23904, 3210.5164)	13.5404
(<i>2E,6E</i>)-farnesoate	422889	1	102285	1	1	1	1	1	182125	1	1	1	422398	170671	560453	97862	1	1	238510	1	CPD-12585	CPD-12585 [ C15 H23 O2, tgt=32.67, overall=32.67 ]			(235.36609, 9098.562)(236.169, 407.63)(218.1593, 17412.025)(218.15865, 1029.3334)(221.1705, 429.52)(241.15579, 40637.406)(242.15889, 3356.56)(244.15523, 5659.6304)	3.36767
methyl (<i>2E,6E</i>)-farnesoate	1	1	1	1	1	1	1358722	1	1	1	2568106	1	1	1	1	1	1869900	1672000	1843523	1	CPD-12586	CPD-12586 [ C16H26O2, tgt= ]			(268.22205, 3780.312)(250.21477, 77234.83)(251.21786, 10873.466)(273.184, 3262.99)	17.367
(2<i>E</i>,6<i>E</i>)-farnesyl phosphate	977581	1	1	1	1	745209	1	1	327917	262399	1	10382171	1	1734303	324189	1	8543402	1	9697221	1	CPD-12587	CPD-12587 [ C15 H25 O4 P, tgt=43.98, overall=43.98 ]			(300.70065, 46374.117)(302.1466, 10160.067)(303.1484, 2733.41)(301.1648, 123.01)(321.1922, 131.19)(325.94418, 712.44)(326.144, 168.72)(327.1417, 1019.86)	5.71912
<i>N</i>-acetyl-farnesylcysteine	359177	300335	1	1	192424	215726	930335	1	1	487453	138317	1	1	232525	1	1	642199	897520	640525	1	CPD-12592	CPD-12592 [ C20 H32 N O3 S, tgt=21.07, overall=21.07 ]			(371.2062, 12907.394)(372.20932, 1325.3683)(366.23175, 16114.414)(367.23557, 1682.2461)(368.2485, 165.74)(393.39407, 14359.425)(394.86597, 42224.227)(395.2005, 25065.59)	13.3485
all-<i>trans</i>-geranyl-geranyl monophosphate	2057988	657666	2290146	1878039	446686	3027773	5298047	1967051	4403711	1986383	2781902	2717559	3540273	4392808	3527311	2635385	2051481	1300981	1	2236379	CPD-12594	CPD-12594 [ C20 H33 O4 P, tgt=49.33, overall=49.33 ]			(351.2142, 179296.27)(352.2173, 31139.32)(353.2187, 3809.85)(369.2108, 1811.64)(351.21564, 146392.7)(352.2187, 25833.646)(353.21988, 3139.7556)(387.5812, 8457.877)(387.2408, 4923.57)(392.40253, 47692.477)(392.1966, 18791.975)(393.1985, 4501.68)(373.52042, 44083.504)(374.1866, 8683.995)(375.19476, 1820.8099)	6.841
D-glucaro-1,5-lactone	303206	1	1	1	1	1	127296	183058	1	1	132299	1	417915	1	91924	1	121065	130329	142716	1	CPD-12595	CPD-12595 [ C6 H7 O7, tgt=34.67, overall=34.67 ]			(191.0147, 1636.2484)(175.44046, 15696.068)(176.0117, 46460.93)(177.0217, 7076.65)(193.03523, 9767.204)(175.02115, 21468.295)(177.0246, 750.66)(210.06169, 18965.72)(191.04124, 4390.2476)(192.0564, 354.84)(214.00404, 2578.5156)(198.50327, 1445.605)(200.0013, 138.35)	1.949
&beta;-D-mannopyranose	1	1	1	1	579474	1	4034488	714080	807070	1381265	1952619	1057083	2617141	1	2962709	1	992016	1541347	1	1	CPD-12601	CPD-12601 [ C6H12O6, tgt= ]			(183.50024, 3534.077)(184.0742, 4771.985)(164.80627, 6511.4673)(166.0583, 486.96)(184.0737, 5368.1196)(163.06088, 2183.1716)(198.09723, 1893.1017)(180.08766, 3558.723)(203.05348, 47573.883)(204.05641, 1929.389)(205.04846, 326.99002)(188.18808, 1516.0829)(189.0462, 428.8)	1.828
L-seryl-glycine	1058795	1006856	854030	995878	1203525	766710	1055812	751969	931164	1154892	1284917	1350237	868426	419903	424737	1021372	829200	737779	1065604	892519	CPD-12607	CPD-12607 [ C5 H10 N2 O4, tgt=57.66, overall=57.66 ]			(163.21347, 95486.83)(164.06648, 5468.9385)(145.10262, 54384.617)(146.32912, 1508.3745)(164.0745, 2153.01)	8.2402
(<i>S</i>)-dihydrodaidzein	1647522	192128	340553	320449	410327	2186683	480267	1216491	426746	278688	439944	1326893	2660751	533666	1	268086	521198	469772	633335	195061	CPD-12609	CPD-12609 [ C15 H12 O4, tgt=38.24, overall=38.24 ]			(258.6497, 714.1243)(261.09363, 1863.98)(261.09274, 3769.74)(240.07698, 308.495)(241.0757, 227.46)(275.11127, 2280.4858)(276.1089, 5381.446)(256.8543, 3752.9873)(280.87057, 2440.197)(261.05286, 17381.145)(262.05194, 1598.6307)(263.05234, 429.61002)	1.87
3-[(8Z,11E,13Z)-pentadeca-8,11,13-trien-1-yl] )catechol	1	1	1	149977	1	1	130387	1	1	1	293459	184992	1	1	1	1	434953	197046	270062	1	CPD-12620	CPD-12620 [ C21 H30 O2, tgt= ]			(318.2408, 2277.65)(298.2144, 24032.398)(299.88916, 31816.74)(318.2394, 1977.09)(320.2562, 428030.12)(299.23053, 234756.39)(301.233, 79021.38)(302.23755, 7593.6797)(333.4654, 13492.648)(334.7649, 2722.7476)(337.2173, 11010.801)(338.22046, 1357.355)	17.694
4-(indol-3-yl)butanoyl-&beta;-D-glucose	199282	2861869	1	162857	1	144882	1	178216	1	1	182519	1	1	1	1	1	1	344942	1	1	CPD-12621	CPD-12621 [ C18 H23 N O7, tgt=49.90, overall=49.90 ]			(365.13834, 31176.068)(366.1394, 13697.87)(347.13153, 9917.051)(370.83163, 13264.755)(371.1682, 33144.56)(367.1772, 3622.34)(391.1562, 1216.8)	4.48033
dimeric urushiol	1	719742	839689	1277584	1	1053448	1	1	814105	1	649351	1	1874718	951302	1	2106337	775083	1	642788	1805578	CPD-12622	CPD-12622 [ C42H58O4, tgt= ]			(626.43365, 10556.872)(627.4368, 529.1767)(633.121, 1900.57)(615.4424, 1243.3082)(645.21967, 31747.998)(646.47003, 9677.91)(632.09784, 3796.94)(632.4756, 2207.2634)(650.424, 1771.6539)(637.44775, 760.38)	19.2382
salicylate 2-O-&beta;-D-glucoside	1527460	1163722	1081111	833972	1053756	1392410	511529	885290	1140120	1602499	812879	629054	1126571	1918991	1565578	362402	601249	452833	835888	528975	CPD-12628	CPD-12628 [ C13 H15 O8, tgt=78.46, overall=78.46 ]			(303.0889, 743.77997)(286.0795, 732.84)(321.1294, 2487.3198)(304.054, 58489.49)(305.05585, 8070.546)	6.893
salicylate &beta;-D-glucose ester	1	129462	273834	162551	242547	290848	141497	174756	162421	321397	1	299353	452754	279712	597549	135659	277649	170239	154730	201661	CPD-12629	CPD-12629 [ C13 H16 O8, tgt=47.40, overall=47.40 ]			(302.897, 5190.992)(285.58713, 821.0225)(323.07416, 8926.858)(305.06516, 1288.902)	1.563
benzoyl-&beta;-D-glucopyranose	222204	736233	1	1	162848	1	497401	210140	1	259916	351031	1	1	141680	252361	2039271	179247	398312	424498	631226	CPD-12630	CPD-12630 [ C13 H16 O7, tgt=57.81, overall=57.81 ]			(286.1068, 876.69995)(284.1114, 5661.79)(307.0821, 20693.582)(308.0832, 1970.4785)(291.41165, 2855.683)(294.0756, 1487.54)	1.838
8'-(3,4-dihydroxy-5-alkenyl)phenyl-3-[9'E,11'E,13'Z-pentadecatrienyl]catechol	1074845	719742	839689	1277584	927910	1053448	908585	354503	814105	767418	649351	1	1874718	951302	496485	2106337	775083	727282	642788	1805578	CPD-12632	CPD-12632 [ C42 H58 O4, tgt=53.09, overall=53.09 ]			(626.43365, 10556.872)(627.4368, 529.1767)(633.121, 1900.57)(615.4424, 1243.3082)(645.312, 26017.53)(646.47144, 7482.434)(647.4845, 6819.989)(648.489, 1755.0267)(632.09784, 3796.94)(632.4756, 2207.2634)(650.424, 1771.6539)(637.44775, 760.38)	20.405
(glutathion-<i>S</i>-yl)(1<i>H</i>-indol-3-yl)acetonitrile	1269413	967249	924307	697938	867588	1119970	448653	742940	972053	1337696	724381	547031	944189	1576116	1392735	1578829	536620	393971	754571	434395	CPD-12634	CPD-12634 [ C20 H22 N5 O6 S, tgt=64.32, overall=64.32 ]			(465.1512, 1298.76)(465.10318, 45978.395)(466.21167, 8130.4834)(467.10907, 1441.452)	6.895
(L-cysteinylglycin-<i>S</i>-yl)(1<i>H</i>-indol-3-yl)acetonitrile	289470	2562937	269404	853122	1	264233	1587424	295346	377627	326565	667128	1	279204	518179	237595	306502	864924	539413	437521	1	CPD-12635	CPD-12635 [ C15 H16 N4 O3 S, tgt=57.71, overall=57.71 ]			(337.2549, 16244.031)(317.25168, 1346.6552)(318.66824, 1564.7686)(321.0956, 1730.3232)(350.13, 19217.785)(351.1302, 2079.275)(333.1136, 290.72)(337.06393, 19426.943)(338.0642, 3943.22)	5.32629
2-(cystein-<i>S</i>-yl)-2-(1H-indol-3-yl)-acetonitrile	353122	265992	345500	417531	395869	105266	432013	118548	384413	399972	107779	1	189852	292959	347178	85204	1	1	460998	299368	CPD-12636	CPD-12636 [ C13 H13 N3 O2 S, tgt=33.97, overall=33.97 ]			(277.86746, 3107.732)(279.0804, 2279.1167)(281.07153, 9066.485)(260.55734, 7433.675)(261.0663, 1916.69)(279.0821, 878.75)(264.07236, 1621.745)(293.186, 16868.006)(294.10455, 1768.31)(277.59808, 1781.36)(298.06622, 6581.082)(299.0678, 436.08)	3.72022
1-hydroxycumene	447355	456143	1637830	523999	353951	308032	1	1	536244	649193	1	630918	603073	1798000	892089	1958194	311636	1	1	213284	CPD-12643	CPD-12643 [ C9 H12 O, tgt=80.28, overall=80.28 ]			(137.6934, 28337.037)(139.09496, 2129.4165)(137.09674, 27523.646)(138.10008, 2007.9875)(119.33758, 2050.049)(142.07034, 1171.2151)	6.31559
1-palmitoyl-2-vernoloyl-phosphatidylcholine	443206	306241	127943	246656	1101982	198788	1	1	297929	397335	1102999	1	581601	1	408468	1	643826	1	629181	1042633	CPD-12644	CPD-12644 [ C42 H80 N O9 P, tgt=59.29, overall=59.29 ]			(777.57, 8913.479)(778.5731, 2728.3674)(756.5546, 10989.097)(757.55804, 3328.8164)(773.58936, 5893.957)(774.592, 2392.9666)(778.5366, 2473.2766)	24.5535
(11Z,14Z,17Z)-icosatrienoyl-CoA	1	1	1	1	1	1	1	1	1	1	1	94984	97527	1	114507	95566	1	106672	1	1	CPD-12647	CPD-12647 [ C41 H64 N7 O17 P3 S, tgt= ]			(1069.3513, 3835.668)(1070.3501, 3444.17)(1071.3486, 900.1375)	30.241
sciadonoyl-CoA	1	1	1	1	1	1	1	1	1	1	1	94984	97527	1	114507	95566	1	106672	1	1	CPD-12648	CPD-12648 [ C41 H64 N7 O17 P3 S, tgt= ]			(1069.3513, 3835.668)(1070.3501, 3444.17)(1071.3486, 900.1375)	30.241
(9Z,12Z)-octadecadien-6-ynoate	1	1015064	1	945538	710442	1	1133793	1	1	1373964	1347870	1637480	1	713055	1	560380	1211893	1232372	945334	957799	CPD-12652	CPD-12652 [ C18H27O2, tgt= ]			(275.20142, 53233.71)(276.2045, 8666.689)(257.19022, 1975.5499)(259.20602, 977.3867)	10.167
stearidonate	751298	1015064	1117898	945538	710442	515977	1133793	847650	993532	1373964	1347870	1637480	1701510	713055	842412	560380	1211893	1232372	945334	957799	CPD-12653	CPD-12653 [ C18 H27 O2, tgt=78.54, overall=78.54 ]			(275.20148, 49762.79)(276.20462, 7976.307)(257.19037, 1737.8326)(259.20602, 977.3867)(279.23264, 11392.653)(280.23602, 1640.875)	12.3079
dicranin	1	1	1	1	1	1	1	1	1	1	169347	1	1	1	1	1	337014	1	1	140517	CPD-12654	CPD-12654 [ C18H25O2, tgt= ]			(273.1819, 5322.55)(255.17845, 2232.715)(274.20044, 8328.45)(276.2156, 1079.08)	4.929
1-(4-hydroxyphenyl)-3-(2,4,6-trihydroxyphenyl)propane-1,3-dione	4003778	2774055	3274423	3402612	1909753	2663255	228540	2469779	3172545	1050861	338437	2281036	3549242	3370849	4798378	4117342	404628	1	462501	1393966	CPD-12655	CPD-12655 [ C15 H11 O6, tgt=93.51, overall=93.51 ]			(287.056, 133218.64)(288.05902, 19613.303)(289.0613, 2632.0017)	7.479
C-hexosyl-luteolin	970323	1	756066	556895	1	896197	1	568738	814999	1088276	1	450212	110950	1	905318	1	439977	1	626593	1	CPD-12657	CPD-12657 [ C21 H19 O11, tgt=14.87, overall=14.87 ]			(449.10843, 6242.9355)(449.10867, 5416.329)	6.877
2,5-dihydroxybenzoate 2-O-&beta;-D-glucoside	481918	179185	155531	1	145429	273745	1	265931	1	1	845701	358409	507567	342025	714785	205958	1	1	121879	208847	CPD-12663	CPD-12663 [ C13 H15 O9, tgt=47.62, overall=47.62 ]			(297.78104, 4864.739)(298.5661, 1016.7725)(320.1823, 852.4573)(321.09772, 2015.8875)(298.73453, 3000.5818)(303.0825, 4290.54)(335.1097, 577.9)(317.102, 139.27)(338.06522, 5079.553)(339.06183, 869.01337)(322.05545, 500.38428)	1.82741
2,5-dihydroxybenzoate 5-O-&beta;-D-glucoside	1	1	1	1	1	1	1	1	1	1	845701	1	1	1	1	1	1	1	1	1	CPD-12665	CPD-12665 [ C13H15O9, tgt= ]			(335.1097, 577.9)(317.102, 139.27)	2.872
(<i>R</i>)-mandelonitrile	1	1	1	1	878332	1	2495414	2479574	1	1	625925	2701322	1	1	1	1	495451	2239237	1	1	CPD-12702	CPD-12702 [ C8H7NO, tgt= ]			(133.0513, 12147.155)(115.04066, 41417.527)(160.0559, 134.51)	8.61879
5-fluoro-5-deoxy-D-ribulose 1-phosphate	1	1	1	1	1	1	405221	1	1	1	303160	1	1	1	1	1	173466	388746	156692	1	CPD-12707	CPD-12707 [ C5 H8 F O7 P, tgt= ]			(231.99779, 3002.02)(214.00363, 5087.764)(249.03874, 22227.945)(250.04163, 1814.95)(251.03915, 1413.47)(233.03255, 6106.3267)	1.949
baicalein	903200	1	638839	664213	1	257267	1	450146	522147	1045972	1	174079	838851	874404	609264	606569	1	1	1	1	CPD-12724	CPD-12724 [ C15 H10 O5, tgt=70.89, overall=70.89 ]			(274.34433, 1871.7344)(288.08734, 1829.2942)(289.08188, 444.31665)(273.17444, 7067.3354)(274.08337, 2988.3477)(294.03815, 159.07)(277.03333, 113762.25)(278.03668, 8809.33)(279.03848, 10867.037)	1.893
baicalin	94587	1	1	1	1	1	1	1	1	1	1	1	187837	1	139009	1	1	1	1	1	CPD-12725	CPD-12725 [ C21 H17 O11, tgt=12.37, overall=12.37 ]			(445.0863, 2771.8135)(427.07642, 4565.1167)(447.1004, 858.58496)(471.08463, 1187.9867)(451.0479, 907.02)	1.555
scutellarein	1	1	1	1	1	1	967385	1	1	934013	1014834	1	1	1	1	1	254157	993650	339103	1	CPD-12726	CPD-12726 [ C15H10O6, tgt= ]			(273.0464, 10552.13)(287.0544, 11851.95)(306.0823, 13070.636)(308.08374, 2520.58)(290.24646, 2345.2832)(290.0764, 1831.41)(291.02042, 36648.074)(293.0201, 2388.11)	1.882
wogonin	1	1	1	1	1	1	1	1	1	1	1	1349778	1247029	1	1	1	1	1	1	1	CPD-12727	CPD-12727 [ C16H12O5, tgt= ]			(303.1025, 47.92)(285.09576, 1490.9199)(289.0536, 10854.925)	4.208
rutinose	1786882	1397066	1547083	1494702	624765	580454	1668911	1450536	1649994	1785041	1647367	1682094	1686239	1574215	1810852	651511	1721316	1564354	1727235	1383785	CPD-12733	CPD-12733 [ C12 H22 O10, tgt=63.71, overall=63.71 ]			(326.11868, 27446.744)(327.12018, 4681.485)(312.1311, 276.09665)(348.17096, 6394.584)(336.1175, 274.17)	8.602
(13<i>E</i>)-8&alpha;-hydroxylabd-13-en-15-yl diphosphate	179329	196627	252274	246450	223535	135984	908618	259475	223737	366129	444132	122610	153439	1	309292	153259	445031	110396	318615	224299	CPD-12745	CPD-12745 [ C20 H35 O8 P2, tgt=39.09, overall=39.09 ]			(466.61163, 4693.0557)(466.1767, 2187.49)(449.16602, 726.15497)(452.2014, 281.56)(483.58292, 11635.691)(484.2229, 2095.9949)(466.64322, 5916.541)(466.1976, 2539.53)(489.97528, 21127.672)(490.97867, 3867.864)(473.82507, 5301.502)(475.168, 5317.95)	7.35205
labd-13-en-8&alpha;-,15 diol	1	1	1	1	1	1	11867532	1	1	1	26768960	1	1	1	1	1	19491238	14868077	16641413	1	CPD-12746	CPD-12746 [ C20 H38 O2, tgt= ]			(293.28418, 6170.76)(295.7934, 1865.5276)(296.2957, 3163.81)(293.2836, 11427.38)(294.287, 899.15)(310.3113, 520513.75)(311.31436, 107839.67)(312.3187, 12472.41)(316.2753, 153.39)	20.65
manoyl oxide	1	1	1	1	1	1	4241189	1	1	1	9632553	1	1	1	1	1	7690614	5151410	5998910	1	CPD-12748	CPD-12748 [ C20 H34 O, tgt= ]			(291.26892, 14647.79)(292.26483, 7802.285)(293.2649, 977.8875)(273.25836, 1002.125)(291.2682, 23576.43)(273.2577, 2891.65)(308.29572, 183697.86)(309.2987, 38099.562)(310.30182, 2535.406)(314.2625, 1161.37)	19.783
decan-2-ol	1	1	1	1	1	1	147806	1	1	1	330738	1	1	1	1	1	300664	163379	224690	1	CPD-12749	CPD-12749 [ C10 H22 O, tgt= ]			(181.15831, 3264.6921)(163.14853, 7507.0806)	18.465
13-epi manoyl oxide	1	1	1	1	1	1	4241189	1	1	1	9632553	1	1	1	1	1	7690614	5151410	5998910	1	CPD-12751	CPD-12751 [ C20 H34 O, tgt= ]			(291.26892, 14647.79)(292.26483, 7802.285)(293.2649, 977.8875)(273.25836, 1002.125)(291.2682, 23576.43)(273.2577, 2891.65)(308.29572, 183697.86)(309.2987, 38099.562)(310.30182, 2535.406)(314.2625, 1161.37)	19.783
<i>N</i>-acetyl-<i>S</i>-geranylgeranyl-L-cysteine	117909	1	120162	1	125632	117620	1826954	112179	116971	127133	106603	1	1	363515	141690	1	1891710	1	1444986	1	CPD-12753	CPD-12753 [ C25 H40 N O3 S, tgt=47.51, overall=47.51 ]			(418.26227, 5689.484)(439.7849, 5887.6724)(436.29364, 2775.375)(439.25308, 1618.2833)(435.2884, 17581.49)(436.2917, 3918.08)	12.5524
(<i>S</i>)-&beta;-macrocarpene	1	1	1	1	1	1	269657	1	1	1	1	1	1	1	1	1	264913	1	598743	1	CPD-12759	CPD-12759 [ C15H24, tgt= ]			(227.17622, 23189.447)(228.17937, 1921.4366)	7.853
2,2'-azino-bis-(3-ethylbenzothiazoline-6-sulfonate)	1	1	1	1	106231	1	1	1	1	1	1	1	1	1	1	95813	1	1	1	89756	CPD-12796	CPD-12796 [ C18 H16 N4 O6 S4, tgt= ]			(513.00415, 1576.65)(512.01917, 3196.6965)(513.0035, 1025.99)	19.04
1,2-dipalmitoyl-phosphatidylglycerol-phosphate	1547733	1651182	1382765	877380	1489788	1362807	1036084	1537623	1249789	1313956	493249	1	882444	1756654	1	1049395	620942	138314	770854	361409	CPD-12821	CPD-12821 [ C38 H73 O13 P2, tgt=79.52, overall=79.52 ]			(800.85675, 17324.754)(802.1148, 8073.2266)(803.48486, 2183.565)(781.4628, 14929.951)(782.4537, 4568.409)(783.443, 186.87)(801.4778, 15270.266)(802.48114, 6038.67)(803.487, 833.88007)(784.4719, 18513.465)(785.47485, 8037.3604)(785.4783, 7143.55)(818.67145, 3568.8958)(818.4675, 592.27)(801.0751, 19049.525)(802.4821, 9945.185)(803.4855, 2150.9924)	17.6732
folate	7152642	3053411	6266851	6501089	6306973	6048840	10461812	6594864	6653925	7264015	10207117	6444414	6999214	7174994	3128237	6569761	10149524	9525573	10356306	3098139	CPD-12826	CPD-12826 [ C19 H17 N7 O6, tgt=90.04, overall=90.04 ]			(439.13104, 422.28714)(423.10693, 1387.39)(427.1404, 2433.3242)(457.15787, 161817.7)(458.16074, 27136.594)(459.16245, 5479.5894)(460.1809, 271.565)(441.1619, 255.3)	8.949
plastoquinol-9	869615	598264	659526	750760	1014844	607010	1	514879	654246	802246	359087	622704	994553	475492	890916	979272	239331	1	107011	962445	CPD-12829	CPD-12829 [ C53 H82 O2, tgt=56.54, overall=56.54 ]			(768.6435, 1540.1)(750.6577, 4358.687)(751.66034, 1800.3068)(773.61975, 21851.748)(774.62225, 3770.884)(775.6248, 178.76)(756.60645, 3706.3035)(757.60876, 870.535)	20.1105
demethylphylloquinol	98033	98907	106637	95561	149227	85397	708562	75447	73884	671587	1290816	2541292	146064	2737427	126188	129464	1170541	1	952919	173953	CPD-12830	CPD-12830 [ C30 H46 O2, tgt=38.65, overall=38.65 ]			(463.84085, 25298.959)(464.6736, 2605.8967)(464.83615, 424.025)(427.36734, 878.37665)(439.48438, 5238.729)(441.0262, 1804.09)(446.34366, 2518.4534)(439.36725, 24906.822)	19.4467
phylloquinol	1149820	814876	836772	933788	1836975	1137588	1897181	722322	1141434	1144629	2073240	1106689	1877487	1234063	1218803	723646	2251102	2073748	2050017	1038294	CPD-12831	CPD-12831 [ C31 H48 O2, tgt=60.50, overall=60.50 ]			(435.3594, 18350.05)(436.3625, 2988.685)(457.3418, 20548.912)(458.34506, 3562.1753)	22.883
anthraniloyl-<i>O</i>-glucopyranose	455260	280651	272059	223002	1	378061	215249	258213	272264	454604	219905	234746	370927	313598	505402	742757	244480	118191	151556	178024	CPD-12835	CPD-12835 [ C13 H17 N O7, tgt=46.51, overall=46.51 ]			(299.10028, 12416.906)(300.0957, 3676.0996)(285.0951, 4363.67)(287.11093, 1732.7784)(317.13464, 10474.653)(318.1383, 802.01)(303.06488, 2383.9739)(308.5208, 1872.6865)(309.0956, 2873.2148)	5.65305
<i>N</i>-debenzoyl-(3'-<i>RS</i>)-2'-deoxytaxol	1071061	961307	792790	1	467861	1	1	1	1	924979	1	1	1	1	1	1	1	1	1	437765	CPD-12845	CPD-12845 [ C40 H48 N O12, tgt=36.44, overall=36.44 ]			(717.3139, 6386.6104)(718.3159, 779.0967)(717.31274, 7913.805)(718.3128, 1251.365)(735.03125, 7836.1836)(735.3646, 2486.32)	9.563
(3<i>Z</i>)-hex-3-en-1-yl acetate	1151173	368765	518146	428818	905924	292175	1	427365	397592	865074	98202	749093	894815	301589	2840860	650681	1	1	1	562242	CPD-12846	CPD-12846 [ C8 H14 O2, tgt=50.00, overall=50.00 ]			(144.10248, 6549.3516)(145.1052, 2416.32)(126.0914, 2705.36)(146.11786, 4494.384)(142.1228, 2100.12)(147.07681, 17100.68)	1.83
(1<i>E</i>,3<i>E</i>)-4-hydroxybuta-1,3-diene-1,2,4-tricarboxylate	1	196053	143951	205779	165883	1	203342	139255	232043	223406	223149	1	1	168725	1	181854	187659	191069	203618	1	CPD-12849	CPD-12849 [ C7 H3 O7, tgt= ]			(198.98314, 874.95374)(203.00496, 3418.0842)(186.9947, 14889.675)(217.02235, 6986.882)(204.02013, 15727.522)(208.98267, 1609.77)	2.061
4&alpha;,14&alpha;-dimethyl-9&beta;,19-cyclo-5&alpha;-cholest-24-en-3&beta;-ol	387823	256586	468352	595954	318684	571769	717492	372011	426338	364083	1040433	858977	473211	487548	417536	409395	894264	910531	762093	387268	CPD-12850	CPD-12850 [ C29 H48 O, tgt=63.37, overall=63.37 ]			(435.35953, 13727.193)(436.3627, 2012.8604)	22.886
4&alpha;,14&alpha;-dimethyl-5&alpha;-cholesta-8,24-dien-3&beta;-ol	387823	256586	468352	595954	318684	571769	717492	372011	426338	364083	1040433	858977	473211	487548	417536	409395	894264	910531	762093	387268	CPD-12852	CPD-12852 [ C29 H48 O, tgt=63.37, overall=63.37 ]			(435.35953, 13727.193)(436.3627, 2012.8604)	22.886
4&alpha;-methyl-5&alpha;-cholesta-8,14,24-trien-3&beta;-ol	18315464	16199984	13593248	17346760	15749146	13677514	1	13530093	15709156	18319892	1	20839748	13849893	4870080	4891263	14304076	1	11180668	18377180	16275242	CPD-12853	CPD-12853 [ C28 H44 O, tgt=41.16, overall=41.16 ]			(396.33163, 4961.7197)(397.327, 873.09)(398.3474, 1612.5789)	8.584
4&alpha;-hydroxymethyl,4&beta;,14&alpha;-dimethyl-9&beta;,19-cyclo-5&alpha;-ergost-24(24<sup>1</sup>)-en-3&beta;-ol	191074	1155605	1170356	1292273	273506	1039888	1	938096	1077798	183035	748764	1036759	229938	636011	222503	1679207	422436	132843	232931	242754	CPD-12865	CPD-12865 [ C31 H52 O2, tgt=16.03, overall=16.03 ]			(440.4091, 11949.453)(441.41235, 2117.2698)(474.43094, 24084.94)(475.4337, 4257.8774)(461.36502, 34109.766)(462.3679, 3807.1255)	19.7399
4&alpha;-formyl,4&beta;,14&alpha;-dimethyl-9&beta;,19-cyclo-5&alpha;-ergost-24(24<sup>1</sup>)-en-3&beta;-ol	106759	1	1	1	97214	199012	1	1	104373	1	1	1	1	136373	1	1	1	1	1	1	CPD-12866	CPD-12866 [ C31 H50 O2, tgt=12.22, overall=12.22 ]			(436.36288, 7878.468)(463.37817, 5783.878)	23.105
4&alpha;-carboxy-4&beta;,14&alpha;-dimethyl-9&beta;,19-cyclo-5&alpha;-ergost-24(24<sup>1</sup>)-en-3&beta;-ol	6062283	1094683	4010310	5073636	3966460	7047458	10993228	2546556	6048175	7261478	13772111	5409909	3256454	7248834	8733491	3165900	12259765	11207609	12140394	1176746	CPD-12867	CPD-12867 [ C31 H49 O3, tgt=88.78, overall=88.78 ]			(469.36545, 97499.63)(470.36877, 29797.508)(471.37195, 3516.5212)(474.3565, 37428.418)(475.35944, 10497.615)(476.36243, 556.62)	22.3085
cycloeucalenone	364757	1	654990	178506	1	445189	504274	689212	295628	822477	1	266164	129301	336739	402891	1023917	608807	323581	464766	1	CPD-12868	CPD-12868 [ C30 H48 O, tgt=33.49, overall=33.49 ]			(447.34683, 7431.8765)(448.35095, 547.74)(409.3836, 1022.9)(427.21854, 39498.633)(428.37454, 11572.745)(433.75455, 8418.745)(433.7527, 3346.7544)(425.3859, 16038.91)(426.3888, 3178.75)	16.0981
3-methoxy-4',5-dihydroxy-<i>trans</i>-stilbene	403064	1	327712	287661	1	426748	1	320592	434984	121560	1	266002	401003	1	230086	295779	1	1	1	232209	CPD-12871	CPD-12871 [ C15 H14 O3, tgt=37.97, overall=37.97 ]			(242.08873, 4811.174)(224.32898, 8889.063)(245.10793, 741.4563)(227.0921, 361.77)(265.1442, 18480.7)(247.1318, 699.16)(252.0881, 846.55896)	2.0685
solavetivol	1	1	1915653	2031942	1	1	321573	1	4738625	1	726935	242490	1	6228458	1	4358479	325863	852431	1	1	CPD-12884	CPD-12884 [ C15H24O, tgt= ]			(221.18645, 54200.98)(222.1902, 16802.72)(221.18721, 177450.38)(222.19032, 27194.357)(223.1922, 1448.04)(203.18326, 364.81)(245.18134, 2676.4055)(246.38095, 707.964)(228.17084, 1226.2001)	1.58
&delta;-guaiene	1	1	1	1	1	1	269657	1	1	1	1	1	1	1	1	1	264913	1	598743	1	CPD-12888	CPD-12888 [ C15H24, tgt= ]			(227.17622, 23189.447)(228.17937, 1921.4366)	7.853
p-hydroxymandelonitrile	7755765	7674356	6715458	7809612	6426813	6694627	4216907	7641918	7469849	6939965	3784496	5420874	6218888	6868541	8825680	6489307	4068421	3570540	3365555	9084532	CPD-12889	CPD-12889 [ C8 H7 N O2, tgt=84.20, overall=84.20 ]			(150.68878, 2092.292)(131.03436, 449.03497)(150.05576, 200445.34)(151.05917, 17924.9)(136.055, 465.93)(137.0619, 3471.57)(168.08813, 1374.3431)(150.87608, 16505.605)(152.07799, 2083.529)(154.08585, 365.96497)	2.457
(<i>E,E</i>)-farnesylacetone	1	1	1	78884	1	1	2877091	1	1	1	263734096	1	1	1	1	1	4277955	178967664	201936912	1	CPD-12898	CPD-12898 [ C18 H30 O, tgt= ]			(263.0352, 329752.12)(264.24106, 99723.5)(265.24396, 8642.987)(266.24802, 1538.2433)(246.22705, 2926.0598)(247.2269, 822.58)(263.2379, 10260.59)(264.2425, 317.68)(245.22726, 113098.56)(246.23035, 27281.154)(247.23344, 813.7233)(280.26437, 2740575.0)(281.26758, 658537.9)(282.2723, 63600.73)(283.27365, 5981.23)(262.25317, 3205.1233)(269.20935, 13957.714)(270.2132, 1232.62)	18.0291
(<i>E</i>)-geranylacetone	417072	1	1	1	1	1	199027	1	1	1	432983	1	405711	1	554058	1	725192	651068	1	1	CPD-12901	CPD-12901 [ C13 H22 O, tgt=60.72, overall=60.72 ]			(196.1698, 11416.545)(177.16379, 1400.55)(198.18575, 22176.219)(199.18869, 2043.51)(177.1649, 1672.22)(212.20139, 15481.201)(213.2047, 333.25)(217.15556, 21009.326)(218.15865, 839.7033)	14.891
4&alpha;-hydroxymethyl-ergosta-7,24(24<sup>1</sup>)-dien-3&beta;-ol	5733628	649487	2807717	4242842	2942161	9985187	9879015	1494618	6218254	6699405	20061956	5994570	2217114	10965202	8928672	1	12430910	11491471	11805365	492679	CPD-12907	CPD-12907 [ C29 H48 O2, tgt=97.00, overall=97.00 ]			(429.3714, 14126.78)(430.3752, 3254.33)(429.37317, 91139.375)(430.37653, 26941.014)(431.3795, 3433.3013)(435.3591, 3020.8044)	23.788
4&alpha;-formyl-ergosta-7,24(24<sup>1</sup>)-dien-3&beta;-ol	1185783	742478	864702	1081074	676213	908626	583474	1147840	855265	1062032	549853	1123619	1062504	1144171	1305347	922809	553654	464555	605307	768417	CPD-12908	CPD-12908 [ C29 H46 O2, tgt=31.84, overall=31.84 ]			(426.86716, 10689.685)(427.87042, 2612.509)(428.35287, 12488.81)(429.356, 3120.865)(431.3952, 3037.7593)(432.31992, 609.01794)	8.279
4&alpha;-carboxy-ergosta-7,24(24<sup>1</sup>)-dien-3&beta;-ol	74559	1	1	1	1	1	1	1	1	80871	1	1	83018	94455	108341	1	1	1	1	1	CPD-12909	CPD-12909 [ C29 H45 O3, tgt=31.15, overall=31.15 ]			(424.32135, 6281.282)(425.3243, 739.506)(426.33698, 16645.996)(427.34033, 4081.234)(428.3526, 13306.628)(429.3559, 2905.0923)	8.149
4&alpha;-formyl-stigmasta-7,24(24<sup>1</sup>)-dien-3&beta;-ol	1	1	1	1	1	1	109396	1	1	1	136898	1	1	1	1	1	1	1	1	1	CPD-12912	CPD-12912 [ C30H48O2, tgt= ]			(424.36218, 8352.5)(425.37006, 2886.545)	17.43
4&alpha;-carboxy-stigmasta-7,24(24<sup>1</sup>)-dien-3&beta;-ol	5182452	3161778	3480619	4835494	7696399	4271243	1	2575795	3612098	315424	1	3204615	6318318	3075684	5178839	6897111	1	1	1	7403233	CPD-12914	CPD-12914 [ C30 H47 O3, tgt=30.60, overall=30.60 ]			(456.36777, 43926.605)(457.3707, 11435.099)(439.33893, 9442.505)(456.46906, 25774.082)(457.37213, 6952.6255)(439.34296, 5828.907)(440.3602, 3525.04)(481.64157, 703.1407)(483.36667, 3456.5713)(461.32468, 36411.73)(462.32736, 9097.813)(463.32755, 483.79)	19.319
avenastenone	1	1	1032476	1140804	1	1056867	240040	1375055	1	1	1453779	1	1	1562291	1	1178775	196128	1	250149	5204394	CPD-12915	CPD-12915 [ C29 H46 O, tgt=11.88, overall=11.88 ]			(433.85403, 8534.485)(434.3551, 287.89)(415.32996, 28818.176)(416.33008, 6934.2773)(417.3525, 5297.88)	7.65875
4&alpha;-hydroxymethyl,4&beta;,14&alpha;-dimethyl-9&beta;,19-cyclo-5&alpha;-cholest-24-en-3&beta;-ol	423755	470277	342073	362899	521629	254165	273409	361438	336851	433012	1	1	643262	347492	447512	543274	331297	173417	1	670450	CPD-12916	CPD-12916 [ C30 H50 O2, tgt=40.67, overall=40.67 ]			(447.40295, 4291.133)(448.40637, 604.41254)(425.36664, 11721.444)(426.36978, 1466.9132)(447.4048, 3704.1802)(448.4081, 415.2133)(464.43106, 13370.409)(465.4343, 2138.375)(469.38654, 11733.92)(470.38986, 1786.4816)	19.1851
4&alpha;-hydroxymethyl-5&alpha;-cholesta-7,24-dien-3&beta;-ol	152650528	5183497	139746480	150067792	4959846	149066960	1640570	75845264	154254624	150598128	1997043	145595504	149493920	65582984	65849076	152516096	72158792	68567536	132791224	5608429	CPD-12917	CPD-12917 [ C28 H46 O2, tgt=67.13, overall=67.13 ]			(414.94336, 599176.4)(415.94672, 171767.77)(418.35745, 22485.83)(419.3616, 10113.36)(396.73114, 2352.696)(397.3263, 616.3)(416.3558, 2003003.0)(417.3594, 569013.75)(418.36212, 81678.35)(419.3646, 7829.239)(398.34457, 3620.7922)	8.583
4&alpha;-formyl,4&beta;,14&alpha;-dimethyl-9&beta;,19-cyclo-5&alpha;-cholest-24-en-3&beta;-ol	1	1	1	1	1	1	109396	1	1	1	136898	1	1	1	1	1	1	1	1	1	CPD-12918	CPD-12918 [ C30H48O2, tgt= ]			(424.36218, 8352.5)(425.37006, 2886.545)	17.43
4&alpha;-carboxy,4&beta;,14&alpha;-dimethyl-9&beta;,19-cyclo-5&alpha;-cholest-24-en-3&beta;-ol	5182452	3161778	3480619	4835494	7696399	4271243	1	2575795	3612098	315424	1	3204615	6318318	3075684	5178839	6897111	1	1	1	7403233	CPD-12919	CPD-12919 [ C30 H47 O3, tgt=30.60, overall=30.60 ]			(456.36777, 43926.605)(457.3707, 11435.099)(439.33893, 9442.505)(456.46906, 25774.082)(457.37213, 6952.6255)(439.34296, 5828.907)(440.3602, 3525.04)(481.64157, 703.1407)(483.36667, 3456.5713)(461.32468, 36411.73)(462.32736, 9097.813)(463.32755, 483.79)	19.319
4&alpha;,14&alpha;-dimethyl-9&beta;,19-cyclo-5&alpha;-cholest-24-en-3-one	1	1	1032476	1140804	1	1056867	1	1375055	1	1	1453779	1	1	1562291	1	1178775	1	1	1	5204394	CPD-12920	CPD-12920 [ C29 H46 O, tgt=11.88, overall=11.88 ]			(435.3638, 3973.26)(415.32635, 38725.938)(416.33008, 6934.2773)(417.3525, 5297.88)	7.805
4&alpha;-formyl-5&alpha;-cholesta-7,24-dien-3&beta;-ol	740360	510298	23100470	732392	537134	741007	22051878	1249894	674446	1410688	245954	574396	1348133	1791329	1775725	829967	161256	19374258	246895	476902	CPD-12927	CPD-12927 [ C28 H44 O2, tgt=76.13, overall=76.13 ]			(413.3311, 412441.84)(415.34268, 233679.62)(416.3566, 551779.25)(417.3604, 152650.9)(418.36346, 19641.719)(397.76764, 2129.9788)(398.34552, 714.82996)(414.33752, 95606.164)(415.87674, 234667.92)(416.885, 344362.06)(417.88797, 87692.57)(418.56113, 20132.367)(419.36438, 3666.5176)(396.3305, 3911.52)(398.3465, 1370.75)(430.36865, 12085.377)(431.37177, 3052.5466)	9.11
4&alpha;-carboxy-5&alpha;-cholesta-7,24-dien-3&beta;-ol	647480	452486	459191	596984	394682	497774	358921	632529	462332	578111	312053	672375	570447	1	690350	488670	360284	292813	356450	476192	CPD-12928	CPD-12928 [ C28 H43 O3, tgt=18.11, overall=18.11 ]			(432.34708, 642.5494)(414.33478, 2443.135)(415.31958, 20003.975)(413.26953, 3866.6958)(414.862, 8909.393)(415.42285, 25056.244)(416.32736, 2208.265)(427.33984, 2970.7415)	8.265
5&alpha;-cholesta-7,24-dien-3-one	1	1	1	1	1	1	309146	1	1	1	654382	1	1	1	1	1	374149	447163	496688	1	CPD-12929	CPD-12929 [ C27 H42 O, tgt= ]			(364.32086, 11104.025)(365.32416, 1522.09)	17.884
5,10-methylenetetrahydropteroyl tri-L-glutamate	122107	1	1	1	1	1	100260	1	1	1	212841	1	1	1	1	1	1	1	230476	1	CPD-12996	CPD-12996 [ C30 H33 N9 O12, tgt=61.90, overall=61.90 ]			(735.21106, 11858.186)(736.214, 3491.4702)(737.2308, 3158.56)(739.2438, 1416.29)	5.25
&alpha;-3',4'-anhydrovinblastine	3719704	489862	1123399	1924563	1617238	3650657	1	204802	334492	810480	1	3104089	1895399	1700480	176806	202802	1	1	1	1269198	CPD-13001	CPD-13001 [ C46 H58 N4 O8, tgt=18.02, overall=18.02 ]			(795.3292, 6147.0723)(796.4389, 1846.4143)(799.46185, 777.78503)(776.9164, 2262.2288)(778.9154, 1558.12)(779.4181, 902.22)(795.4514, 4163.29)(796.4541, 421.73)(777.61334, 10735.87)(778.445, 6065.3364)(816.13074, 1086.5422)(817.06836, 3365.8743)(818.1414, 2066.3801)(818.4759, 878.89)(795.28204, 8350.205)(796.45386, 3595.7002)(797.4583, 1014.71)(799.4643, 394.38)	16.1318
2-benzyl-thiohydroximate-O-sulfate	3177071	1682844	2612624	2426885	1964219	3320512	491261	2710686	3175811	2794596	907806	2123090	2983492	2530286	2025162	112452	510926	789384	1069693	2202984	CPD-13006	CPD-13006 [ C8 H7 N O4 S2, tgt=48.11, overall=48.11 ]			(229.97531, 1972.6445)(263.11734, 117661.016)(264.1205, 8339.295)(267.0156, 10754.18)(245.4067, 5766.6865)(269.2281, 8304.415)(272.9756, 1376.86)(254.9513, 1949.09)	1.795
tetrahydropteroyl tri-L-glutamate	479225	374473	371667	343308	353469	308027	1	353222	400545	429556	1	329824	408748	108393	475600	398072	1	1	1	398950	CPD-1301	CPD-1301 [ C29 H33 N9 O12, tgt=9.59, overall=9.59 ]			(684.2041, 16226.868)(685.20496, 10599.354)(700.7533, 2224.9048)(699.2566, 6408.745)	27.275
tributyrin	99755	288030	265393	1	362745	234801	148355	129171	1	100532	1	1	322157	233803	251422	331640	246541	1	141298	324860	CPD-13014	CPD-13014 [ C15 H26 O6, tgt=47.19, overall=47.19 ]			(303.50952, 25385.822)(305.1753, 6400.835)(284.83096, 5356.0635)(308.2002, 3486.69)(285.17004, 6806.803)(303.1993, 10734.907)(303.19928, 1165.5925)(325.16132, 11308.596)(326.1657, 352.88)(309.15533, 1193.0725)	5.57927
5-methyltetrahydropteroyl tri-L-glutamate	1	228127	1	141854	1	1	397835	1	182251	342745	307488	1	1	1	215116	1	457871	229405	205612	1	CPD-1302	CPD-1302 [ C30H35N9O12, tgt= ]			(731.2897, 11261.492)(732.2929, 3306.9087)(733.30566, 635.74)(739.2592, 1428.87)	8.395
<i>N</i><sup>2</sup>-hydroxy-L-tryptophan	920920	583608	834509	658308	667381	815756	980232	641846	831022	838350	705650	1138150	667206	836351	653491	560403	873406	692570	699716	520390	CPD-13026	CPD-13026 [ C11 H11 N2 O3, tgt=82.33, overall=82.33 ]			(205.08109, 25377.238)(206.08789, 2241.0332)(221.08105, 1293.1932)(219.10042, 31928.074)(220.10347, 2344.9768)	7.063
(<i>Z</i>)-indol-3-ylacetaldoxime	556921	422331	506594	504535	437722	1	433779	92684	656752	612687	369535	445789	133075	507781	147781	427194	505624	404508	86863	363863	CPD-13028	CPD-13028 [ C10 H10 N2 O, tgt=47.47, overall=47.47 ]			(157.07071, 27942.275)(158.07246, 4574.273)(175.72748, 3737.69)(157.87695, 20125.957)(158.07338, 5272.951)(159.069, 3103.99)(194.11797, 2234.893)(182.06696, 788.206)(184.0738, 452.49)	3.1548
<i>N</i>-hydroxy-L-phenylalanine	1721663	1	2054962	1767651	1	2209077	4029008	1	1	1	1952619	1	1	434640	2546127	1884342	992016	1541347	1600883	1	CPD-13029	CPD-13029 [ C9 H10 N O3, tgt=80.00, overall=80.00 ]			(182.23595, 4120.0513)(184.0744, 7214.48)(163.56209, 467.36832)(166.0655, 2556.96)(182.74916, 21472.889)(164.56737, 2701.7402)(198.85132, 1484.7612)(180.08849, 4386.876)(203.05418, 37210.293)(204.05682, 1422.9478)(205.0487, 264.55)(188.0557, 239.94)	1.92132
<i>N,N</i>-dihydroxy-L-phenylalanine	2484904	1808115	1721238	1671754	1096185	2549451	2358536	1816011	2300093	2248473	669849	1149152	2134999	2544011	3051158	1808403	1	557972	1	1516176	CPD-13030	CPD-13030 [ C9 H10 N O4, tgt=80.54, overall=80.54 ]			(201.07361, 5229.4854)(183.0653, 218.34)(202.0862, 612.09)(180.06398, 1569.5627)(217.10269, 718.9575)(219.11255, 428.135)(219.2284, 49506.71)(220.12169, 4159.6294)(223.0643, 35.68)(201.04376, 8074.3066)	3.30721
(<i>E</i>)-phenylacetaldehyde oxime	2688312	1955357	860999	929225	797361	769516	2728682	837108	1175802	2455305	2663729	1	2717247	709394	2998017	898025	2016719	1917222	2244910	696865	CPD-13031	CPD-13031 [ C8 H9 N O, tgt=81.36, overall=81.36 ]			(117.0582, 9864.407)(118.06579, 71006.555)(119.06802, 5553.4927)(158.0597, 242.32)	4.223
(1,4)-&beta;-xylobiose	1	148387	1	1	364676	104146	74905	1	117418	1	2969909	1	261374	1	1	1	1	675207	1	367016	CPD-13037	CPD-13037 [ C10H18O9, tgt= ]			(284.43246, 9120.7705)(285.102, 425.22)(287.1099, 8449.77)(285.1067, 3366.803)(285.1001, 216.61)(287.1088, 2861.68)(267.76935, 7063.7324)(268.35583, 344750.0)(269.44095, 51533.28)(270.10803, 9748.58)(300.9822, 5898.1704)(282.1194, 4483.06)(307.0827, 42872.516)(308.0844, 5045.755)(289.07928, 15128.653)(289.07678, 5402.4053)(291.0851, 4952.45)	2.7065
1,2-dibutyrin	1	1	1	1	1	1	1	1	196164	1	1	1	1	1	1	223066	368543	226813	271973	1	CPD-13040	CPD-13040 [ C11 H20 O5, tgt= ]			(234.14368, 3790.9976)(215.12656, 6017.32)(250.16345, 706.44)(255.12233, 1324.86)	4.42063
friedelin	1	1	1	1	1	1	159069	1	1	1	667508	1	1	1	1	1	1	523717	447982	1	CPD-13047	CPD-13047 [ C30H50O, tgt= ]			(427.39233, 3755.275)(428.3956, 1811.66)(409.38196, 4673.8525)(410.3849, 967.8)	23.404
glutinol	1	1	1	1	1	1	159069	1	1	1	667508	1	1	1	1	1	1	523717	447982	1	CPD-13048	CPD-13048 [ C30H50O, tgt= ]			(427.39233, 3755.275)(428.3956, 1811.66)(409.38196, 4673.8525)(410.3849, 967.8)	23.404
multiflorenol	1	1	1	1	1	1	159069	1	1	1	667508	1	1	1	1	1	1	523717	447982	1	CPD-13049	CPD-13049 [ C30H50O, tgt= ]			(427.39233, 3755.275)(428.3956, 1811.66)(409.38196, 4673.8525)(410.3849, 967.8)	23.404
2-keto-L-gulonate	1072110	3470701	2030532	1924867	1341111	1085529	1	1904768	2322561	2176959	210993	1203725	1845603	1770153	1473890	2100664	1	1	247082	2116679	CPD-13059	CPD-13059 [ C6 H9 O7, tgt=75.53, overall=75.53 ]			(193.03517, 30365.055)(194.03827, 728.67096)(175.02307, 40205.4)(176.02585, 1085.2087)(177.0224, 1828.56)(198.056, 205.03)(211.06459, 8235.357)(212.06578, 563.2)(198.07486, 3690.0122)(216.1384, 17047.96)(219.02734, 55914.53)(220.03134, 2782.415)(198.01285, 355.55)	2.055
L-<i>threo</i>-tetruronate	139108	366483	166127	124409	66307	112885	1	589117	93323	1	1	126392	159477	1	174777	112159	1	1	1	207057	CPD-13061	CPD-13061 [ C4 H5 O5, tgt=46.40, overall=46.40 ]			(136.29353, 9035.112)(136.02466, 1313.37)(138.0272, 18398.66)(118.472244, 1900.6309)(158.00352, 8139.4717)(137.9916, 10613.069)	1.44
solasodine	45654552	34358332	45876880	39737760	47479728	50516152	41876764	44491488	48259528	44805968	1	1	47982480	55219208	53488308	1	41144264	35664188	45417560	40604276	CPD-13080	CPD-13080 [ C27 H43 N O2, tgt=71.01, overall=71.01 ]			(414.34192, 1409334.8)(415.34543, 404760.75)(396.33023, 3713.546)(400.006, 1203.0299)(401.3437, 2997.48)(416.35727, 838360.94)(417.36108, 234061.88)(418.364, 31658.074)(419.3666, 2813.012)	8.567
solasodine 3-O-&beta;-D-glucoside	3815323	3098486	1	1	2157639	1	3801255	1	4270093	1	3354352	1751468	1	1	1	1	3258401	2819291	3394527	2919072	CPD-13081	CPD-13081 [ C33 H53 N O7, tgt=57.23, overall=57.23 ]			(576.38904, 19848.201)(577.3914, 6390.125)(578.4033, 1830.1855)(579.4076, 461.9225)(576.3912, 63041.66)(577.3894, 28010.78)(594.9061, 75031.03)(595.90906, 25025.914)(596.91174, 4052.3374)(578.4065, 488921.4)(579.4102, 172843.4)(580.4128, 33096.45)(581.4149, 4491.34)(586.3749, 3374.06)	7.2318
brassicasterol 3-O-&beta;-D-glucoside	110476	1370023	1558416	155810	1	1873579	1	1031528	1525593	1948682	144779	98500	170006	112667	92270	330987	1	1	1	114500	CPD-13084	CPD-13084 [ C34 H56 O6, tgt=43.56, overall=43.56 ]			(561.4921, 9327.316)(547.3989, 770.31)(564.414, 12530.643)(545.6705, 49779.113)(545.4236, 2917.5881)(579.431, 22562.17)(580.43134, 5987.6367)(564.4422, 1512.95)(585.24835, 1212.61)(567.9023, 3013.5144)(566.376, 2331.782)	19.8018
3,5-didehydroshikimate	323346	186894	277280	145960	201515	280664	226446	285717	407679	458715	100400	250366	327651	281059	358528	116187	232810	191105	210621	120873	CPD-13085	CPD-13085 [ C7 H5 O5, tgt=43.97, overall=43.97 ]			(150.99814, 843.485)(171.25116, 9172.012)(173.74727, 1414.6272)(175.0373, 1960.4733)(154.6188, 2232.317)(155.01967, 4323.1826)(192.05595, 5928.248)(169.03572, 8838.427)	1.667
(9Z)-12,13-dihydroxyoctadeca-9-enoate	645687	674082	1183880	693314	840546	626201	199384	842457	944337	234335	388297	1	1164067	539621	484187	1	219352	298617	231317	956316	CPD-13086	CPD-13086 [ C18 H33 O4, tgt=67.31, overall=67.31 ]			(313.2373, 1374.62)(295.22726, 20781.057)(296.2302, 2537.0994)(318.21246, 5356.806)	14.2098
(9Z)-12,13,17-trihydroxyoctadeca-9-enoate	301258	104509	372813	402366	209657	150567	473599	218509	223491	421475	608250	587738	870873	208975	837550	1	455662	344362	383894	233948	CPD-13087	CPD-13087 [ C18 H33 O5, tgt=45.36, overall=45.36 ]			(311.22214, 3117.625)(313.23737, 787.66)(347.5601, 7265.7476)(349.27725, 2347.716)(352.21805, 21673.0)(353.21936, 2644.5044)(335.2104, 1178.115)	10.162
9,10-12,13-diepoxyoctadecanoate	1	1	1	1	1	1	618592	1	1	1	822925	783682	1	1	1	1	676584	572785	576075	1	CPD-13088	CPD-13088 [ C18H31O4, tgt= ]			(311.22214, 3830.6785)(293.21188, 34981.266)(294.2151, 5592.275)(335.21033, 1304.385)	10.165
(12Z,15Z)-9,10-epoxyoctadeca-12,15-dienoate	1	1336765	1	1	991342	1	1664736	1	1	1	2049371	2309497	1	992925	1	746317	1781524	815083	1448780	1403916	CPD-13089	CPD-13089 [ C18H29O3, tgt= ]			(293.21158, 25829.033)(294.21484, 3791.9875)(275.2013, 48419.973)(276.2044, 7802.8013)	10.167
(9Z,15Z)-12,13-epoxy-octadeca-9,15-dienoate	2064630	1336765	3048740	2274842	991342	1438666	1664736	2274662	2781386	2021382	2049371	2309497	4565922	992925	2344156	746317	1781524	815083	1448780	1403916	CPD-13090	CPD-13090 [ C18 H29 O3, tgt=81.22, overall=81.22 ]			(293.2118, 40468.12)(294.2151, 6343.7495)(295.2179, 1042.45)(275.20145, 45381.47)(276.20456, 7146.548)(316.19727, 14398.623)(317.20078, 902.02496)	12.9196
(9Z,12Z)-15,16-epoxyoctadeca-9,12-dienoate	1	1336765	1	1	991342	1	1664736	1	1	1	2049371	2309497	1	992925	1	746317	1781524	815083	1448780	1403916	CPD-13091	CPD-13091 [ C18H29O3, tgt= ]			(293.21158, 25829.033)(294.21484, 3791.9875)(275.2013, 48419.973)(276.2044, 7802.8013)	10.167
(9Z,15Z)-12,13-dihydroxyoctadeca-9,15-dienoate	1	1	1	1	1	1	618592	1	1	1	822925	783682	1	1	1	1	676584	572785	576075	1	CPD-13092	CPD-13092 [ C18H31O4, tgt= ]			(311.22214, 3830.6785)(293.21188, 34981.266)(294.2151, 5592.275)(335.21033, 1304.385)	10.165
(9Z,12Z)-15,16-dihydroxyoctadeca-9,12-dienoate	1	1	1	1	1	1	618592	1	1	1	822925	783682	1	1	1	1	676584	572785	576075	1	CPD-13093	CPD-13093 [ C18H31O4, tgt= ]			(311.22214, 3830.6785)(293.21188, 34981.266)(294.2151, 5592.275)(335.21033, 1304.385)	10.165
(12Z,15Z)-9,10-dihydroxyoctadeca-12,15-dienoate	1	1	1	1	1	1	618592	1	1	1	822925	783682	1	1	1	1	676584	572785	576075	1	CPD-13094	CPD-13094 [ C18H31O4, tgt= ]			(311.22214, 3830.6785)(293.21188, 34981.266)(294.2151, 5592.275)(335.21033, 1304.385)	10.165
22-oxo-docosanoate	677393	985001	861272	797081	843489	885452	807170	867640	557081	671469	861064	579485	720263	1430165	1403831	542231	700343	621726	989409	496208	CPD-13098	CPD-13098 [ C22 H41 O3, tgt=81.99, overall=81.99 ]			(355.06763, 25835.594)(355.31442, 7620.6553)(356.3195, 305.46)(353.32806, 24222.371)(354.33096, 3870.478)(355.3426, 524.95575)(376.29294, 2226.015)	6.9355
docosanedioate	4998942	2341238	3339585	4404336	4153654	160792	6411011	3139522	5393288	4567258	1016255	131573	2969690	2039230	183070	3049004	441702	808360	5905281	2472697	CPD-13101	CPD-13101 [ C22 H40 O4, tgt=62.86, overall=62.86 ]			(371.3159, 1775.3364)(391.2847, 65197.773)(392.28778, 15347.575)(393.29684, 311.285)	22.7504
GDP-&beta;-L-fucose	1	1	1	1	101549	1	1	1	1	1	1	1	79176	1	1	1	1	1	1	86248	CPD-13118	CPD-13118 [ C16 H23 N5 O15 P2, tgt= ]			(569.06903, 3055.5466)(570.0517, 3861.8333)(614.0771, 401.37)	18.916
indole-3-carboxylate	186958	340583	266032	328878	164417	230782	677312	276889	257493	223244	198283	177668	161806	164228	179255	316478	2463736	177115	1063249	179773	CPD-13135	CPD-13135 [ C9 H6 N O2, tgt=75.77, overall=75.77 ]			(161.50676, 1525.9675)(165.0554, 11915.109)(144.62166, 7354.225)(147.04352, 3519.6924)(164.38701, 5581.982)(143.03603, 7109.144)(182.08192, 58882.715)(183.08502, 5317.567)(162.46834, 1212.898)(183.9491, 2114.2659)(167.0211, 256.18)	2.87725
15,9'-di-<i>cis</i>-phytofluene	1	1	1	1	1	1	8215131	1	1	1	22387924	1	1	1	1	1	16286124	10236956	11865110	1	CPD-13171	CPD-13171 [ C40 H62, tgt= ]			(547.5206, 120442.17)(548.5236, 44369.176)(549.5262, 7637.6562)(560.52405, 468081.75)(561.527, 89934.71)(562.5294, 10635.888)(568.9005, 7211.5757)(571.10596, 9298.053)(571.5059, 8074.355)	18.465
6-hydroxy-2-cyclohexen-one-carboxylate	479282	405213	1332910	1413030	378718	408770	402834	345332	1885613	497795	387170	554491	492205	1633837	546975	1477881	426443	339449	367316	305789	CPD-13172	CPD-13172 [ C7 H7 O4, tgt=64.16, overall=64.16 ]			(156.32289, 3112.2908)(137.40027, 8390.983)(156.33098, 51295.543)(157.04477, 6899.9614)(158.04117, 9695.814)(138.11192, 16378.559)(139.0299, 3216.69)(140.0264, 2309.5)(173.52814, 3532.4626)(174.07011, 568.784)(159.06921, 3969.3474)(183.03127, 5016.5024)	2.1145
salicortin	1274409	648976	916439	915267	277073	1046760	1318965	568529	1173837	1747455	666832	330790	408680	1452001	958809	1555893	1	339146	972053	1	CPD-13173	CPD-13173 [ C20 H24 O10, tgt=86.03, overall=86.03 ]			(425.1434, 62998.62)(426.1463, 10235.28)(427.1477, 1452.55)(425.4957, 33098.59)(426.14557, 6044.646)(427.14993, 1110.76)(407.13144, 47806.688)(408.1344, 7720.853)(409.1368, 850.49)(447.03952, 2977.0935)(429.1728, 212.65)(447.135, 781.25)	5.41805
salicyl-6-hydroxy-2-cyclohexene-on-oyl	1	1	1	1	1	1	370727	1	1	115216	392759	84048	1	1	450801	1	1	1	380781	1	CPD-13174	CPD-13174 [ C14 H14 O5, tgt=27.56, overall=27.56 ]			(245.07356, 9658.167)(246.0826, 171.94)(245.07875, 13830.696)(285.13153, 2858.055)(266.0918, 370.77)(271.0669, 1460.68)	10.8295
<i>p</i>-nitrophenyl-&beta;-D-cellobioside	240827	1	1	1	1	1	1	1	1	1	1	1	1	196171	1	267398	1	1	1	1	CPD-13199	CPD-13199 [ C18 H25 N O13, tgt=43.18, overall=43.18 ]			(481.16995, 12002.374)(482.1732, 833.59)	6.67871
<i>p</i>-nitrophenyl-&beta;-D-xylopyranoside	1	1	119863	1	1	1	304089	1	1	1	305416	1	1	1	420259	123133	306045	289837	312519	1	CPD-13210	CPD-13210 [ C11 H13 N O7, tgt= ]			(277.0948, 8324.922)(259.0841, 50618.797)(289.89706, 6139.06)	8.625
1-pentan-3-one	136819632	110818448	118730688	114380480	47823672	121534288	135381696	119761192	153252768	124826376	120580560	122951840	114853776	140927360	155214944	141082512	140453136	120900072	127914016	122529496	CPD-13220	CPD-13220 [ C5 H10 O, tgt=91.39, overall=91.39 ]			(104.10787, 3919773.5)(105.11107, 220559.92)(106.112755, 11461.286)	1.604
<i>trans</i>-4-hexen-3-one	63134580	71878152	65686588	53155360	58042456	70174008	62642728	60703760	65584740	61981724	69564528	46489380	62417720	95451672	66808796	67575648	59285256	55777792	4895603	46641720	CPD-13222	CPD-13222 [ C6 H10 O, tgt=60.64, overall=60.64 ]			(100.07594, 224.78)(116.1078, 4861.37)(121.06559, 2180719.2)(122.06881, 176122.11)(123.07082, 10314.989)(103.05454, 96021.67)(104.05843, 7383.3594)	2.275
hexan-3-one	1	1284716	1	1	1094077	1297079	864026	1132832	1	1	762847	1	1	1	1	1	1	648651	1	792287	CPD-13223	CPD-13223 [ C6 H12 O, tgt= ]			(104.106964, 6457.3687)(105.07016, 44419.453)(106.073395, 2603.141)	3.641
<i>p</i>-nitrophenyl-chitobiose	161502	96039	113944	1	1	136407	1	94339	111191	130429	1	88805	110680	266707	145924	142729	1	1	1	1	CPD-13225	CPD-13225 [ C22 H31 N3 O13, tgt=2.54, overall=2.54 ]			(545.19977, 3937.6333)(527.1663, 5365.7)(528.1704, 1960.82)(551.2123, 899.38)(545.20105, 3880.4)	7.198
<i>p</i>-nitrophenyl-chitotriose	271816	227240	226021	222120	232078	219455	272010	223688	255534	259488	241648	236863	269444	226445	282595	235233	310668	257978	258857	243410	CPD-13226	CPD-13226 [ C30 H44 N4 O18, tgt=16.17, overall=16.17 ]			(772.27466, 9522.636)(773.2755, 5984.042)(774.27386, 4252.2725)(775.27344, 983.493)	27.973
<i>N,N',N''</i>-triacetylchitotriose	1381369	1	735519	504487	1	1050989	265770	689546	672797	1299314	370729	1942078	1642109	684082	1672266	1574300	1	97617	1	1301351	CPD-13227	CPD-13227 [ C24 H41 N3 O16, tgt=71.50, overall=71.50 ]			(645.2702, 13757.1875)(646.273, 4110.39)(647.271, 677.13)(629.2746, 23228.922)(630.2776, 8224.8)(631.2801, 591.425)(633.2339, 638.795)	20.3791
(<i>E</i>)-2-pentenol	136819632	110818448	118730688	114380480	47823672	121534288	135381696	119761192	153252768	124826376	120580560	122951840	114853776	140927360	155214944	141082512	140453136	120900072	127914016	122529496	CPD-13229	CPD-13229 [ C5 H10 O, tgt=91.39, overall=91.39 ]			(104.10787, 3919773.5)(105.11107, 220559.92)(106.112755, 11461.286)	1.604
8-anilinonaphthalenesulfonate	1243443	1	1097273	1147338	1	1083047	874090	1017544	1388099	1327730	381293	1118154	1034868	1344360	1432015	1007997	1174165	271805	338121	1	CPD-13245	CPD-13245 [ C16 H12 N O3 S, tgt=51.79, overall=51.79 ]			(299.61942, 48082.492)(300.69424, 25068.309)(301.69855, 13005.189)(302.70206, 5501.9917)(303.06073, 5040.5205)(284.96793, 6280.5703)(285.97098, 3701.2988)(286.0431, 3665.38)(301.06686, 1213.2201)(320.58704, 1541.615)(303.08606, 9506.743)(304.0835, 803.4)(321.03882, 13428.13)(322.0502, 598.05)(305.03214, 4734.01)(307.0274, 4624.9)	1.405
artemisinate	1	1	1	1	1	1	167380	1	1	1	108476	1	1	1	1	1	1	1	1	1	CPD-13248	CPD-13248 [ C15H21O2, tgt= ]			(233.1536, 8811.351)(251.18365, 1651.44)	7.398
soyasapogenol A	1601386	1345322	1473672	1751448	1249785	1379985	986498	943818	2071214	1493892	910827	1209288	1666364	1558775	2041661	1214010	987185	874335	876927	2655282	CPD-13251	CPD-13251 [ C30 H50 O4, tgt=47.56, overall=47.56 ]			(474.35907, 39460.316)(475.36215, 10816.792)(476.36493, 730.151)(456.3679, 35012.918)(457.37082, 8787.833)(481.3541, 545.73334)(483.36548, 3556.65)	10.5308
soyasaponin III	1201663	1	9118272	6457856	565116	9573097	1029940	1901351	9001550	1062006	1	13609900	1	8604306	1362812	6360907	1280020	470741	1942205	5233910	CPD-13254	CPD-13254 [ C42 H67 O14, tgt=68.39, overall=68.39 ]			(796.44684, 11049.335)(796.4426, 3535.3977)(797.46295, 1466.025)(777.4418, 17186.857)(778.4458, 7011.553)(801.4758, 12290.895)(802.48, 5060.4854)(779.4556, 59214.33)(780.4586, 23650.477)(781.45966, 7329.277)(782.4496, 2080.66)(814.3237, 20163.951)(814.4961, 10816.221)(815.4972, 3902.104)(816.5122, 1087.42)(817.5138, 259.16)(801.4792, 8112.6016)(818.4604, 204.17)	19.2306
soyasaponin I	1779867	1483312	1449111	1022905	8158770	1	19892440	1408546	1386613	2546015	21534068	1799745	1867681	1448066	2098382	879655	500910	23161844	1	2870215	CPD-13255	CPD-13255 [ C48 H77 O18, tgt=39.65, overall=39.65 ]			(959.57196, 253619.7)(960.57526, 139043.12)(961.57745, 41156.31)(962.5794, 8274.62)(963.5825, 1189.3033)(941.5117, 21030.809)(942.51465, 9605.87)(943.5164, 1561.405)	17.9129
butyl acetate	2231259	994247	1302016	1270394	1885495	2897202	2777979	1533866	2071137	2127932	65212004	1152933	1479863	4023066	2218836	1226614	2669449	52542136	3273650	844671	CPD-13346	CPD-13346 [ C6 H12 O2, tgt=79.90, overall=79.90 ]			(118.086914, 325629.06)(119.090195, 18759.523)(120.09172, 4357.992)(100.0759, 201.24)(134.11816, 4132.9634)(121.065414, 323129.1)(122.068665, 25804.805)(123.070755, 8753.54)	1.894
2,2'-azino-bis-(3-ethylbenzothiazoline-6-sulfonate) radical cation	1	1	1	1	106231	1	1	1	1	1	1	1	1	1	1	95813	1	1	1	89756	CPD-13347	CPD-13347 [ C18 H16 N4 O6 S4, tgt= ]			(513.00415, 1576.65)(512.01917, 3196.6965)(513.0035, 1025.99)	19.04
(2S,3E)-2-amino-4-(2-aminoethoxy)but-3-enoate	195424	81775	160360	294522	386621	417996	341558	429091	112068	94989	1	131695	236414	393927	162372	155951	1	173910	189461	1	CPD-13353	CPD-13353 [ C6 H13 N2 O3, tgt=60.69, overall=60.69 ]			(144.90947, 121706.59)(145.085, 21016.074)(148.8237, 7175.929)(188.09196, 12369.513)(166.64522, 4647.8174)	3.95115
salidroside	11646177	11972876	11568248	12529263	11112508	1	11238791	15244396	12963385	12070525	8549905	9806838	13867262	1	13637500	12146863	9813884	11739119	11949949	12257496	CPD-13354	CPD-13354 [ C14 H20 O7, tgt=59.37, overall=59.37 ]			(301.14203, 252331.31)(302.14508, 39152.32)(303.14746, 3225.1533)	17.604
(2<i>R</i>)-2,3-dihydroxy-3-methylbutanoate	1	121022	1	1	90636	1	2495414	1	1	1	1915177	1	1	1	1	1	1	2239237	1	1	CPD-13357	CPD-13357 [ C5H9O4, tgt= ]			(133.04996, 8906.3)(115.039444, 31695.85)	8.63075
13-apo-&beta;-carotenone	1	1	241201	1	1	1	1741067	300093	1	1	5258067	486679	1	1	1	1	7992807	6767906	7119633	245297	CPD-13369	CPD-13369 [ C18 H26 O, tgt=16.60, overall=16.60 ]			(259.20584, 9712.028)(260.2093, 603.6225)(241.195, 1354.31)(276.2315, 187456.05)(277.23404, 32318.287)(262.63528, 974.228)(263.2359, 3021.26)	18.3137
(2E,4E,6E)-4-methylocta-2,4,6-trienedial	2500835	2869901	2636267	2353984	1152621	2114684	3636306	1977074	2026652	3836632	4605961	2384700	2222071	1296869	1876775	2507161	2613806	4773420	2213532	1321791	CPD-13370	CPD-13370 [ C9 H10 O2, tgt=82.67, overall=82.67 ]			(135.0683, 371.15)(151.07593, 71127.49)(152.07845, 6503.875)(136.0751, 642.896)(168.10147, 18082.896)(169.10516, 558.24335)(150.09198, 705.38995)(176.77036, 7263.6353)(177.07036, 8996.278)(157.04822, 3470.7559)	2.753
pseudoionone	1	1	1	1	1	1	1	1	1	1	900447	1	1	1	1	1	844425	1	1	1	CPD-13371	CPD-13371 [ C13H20O, tgt= ]			(193.1594, 3385.31)(175.1487, 10242.045)(210.186, 18419.79)(211.1893, 938.54004)	18.464
10',6-diapocarotene-10',6-dial	1	198387	173013	201669	392609	98878	162302	118275	260002	363040	1	144910	131167	1	1061605	1	217940	1	1	260742	CPD-13373	CPD-13373 [ C19 H22 O2, tgt=20.92, overall=20.92 ]			(282.16562, 4151.55)(265.65292, 19966.82)(266.15863, 4643.605)(268.1557, 2014.27)(283.17502, 4158.6396)(265.1554, 9638.67)(266.1601, 2382.01)(300.2015, 3274.5261)(305.15656, 4915.074)(287.1431, 613.3)	3.63523
(-)-<i>exo</i>-&alpha;-bergamotene	1	1	1	1	1	1	269657	1	1	1	1	1	1	1	1	1	264913	1	598743	1	CPD-13396	CPD-13396 [ C15H24, tgt= ]			(227.17622, 23189.447)(228.17937, 1921.4366)	7.853
(+)-7-<i>epi</i>-12-hydroxyjasmonoyl-L-isoleucine	198713	141961	170406	175259	168095	164395	1138645	181717	168633	220220	1190520	191502	183615	194950	213091	173540	1401966	1230259	1276234	143652	CPD-13420	CPD-13420 [ C18 H28 N O5, tgt=47.62, overall=47.62 ]			(338.2005, 34989.32)(339.20383, 5450.5723)(326.2004, 6279.538)(356.23038, 6392.601)(362.19962, 9548.601)(343.178, 1123.1365)	11.2778
justicidin B	219615	132616	138984	234967	308044	181009	229115	1	283922	494157	483680	114649	241193	128057	282802	135236	199847	167778	136353	237390	CPD-13455	CPD-13455 [ C21 H16 O6, tgt=42.61, overall=42.61 ]			(365.35043, 8956.632)(349.08734, 2259.2258)(351.10257, 1049.9166)(365.0987, 7396.8)(349.09106, 15787.535)(350.59845, 2705.475)(382.20505, 4795.6343)(383.11575, 1251.1666)(365.12073, 4406.597)(374.07693, 5235.23)	3.64195
diphyllin	425621	1131942	2448438	3417287	395323	1	153917	142642	3054555	122508	115319	141911	199498	4279884	302680	95847	158870	488031	152473	304528	CPD-13456	CPD-13456 [ C21 H16 O7, tgt=42.78, overall=42.78 ]			(382.0838, 25330.629)(365.3112, 3037.4897)(384.1151, 845.1825)(365.5948, 4884.468)(398.1149, 2696.03)(380.44308, 13565.334)(381.9168, 3192.816)(383.1131, 780.145)	3.94942
decylglucoside	1	1	1	1	1	1	6594822	1	1	1	16756197	1	1	1	1	1	593437	6454751	605859	1	CPD-13471	CPD-13471 [ C16 H32 O6, tgt= ]			(347.21802, 320.805)(304.2241, 2339.05)(324.2353, 646.445)(320.23578, 19606.87)(321.2392, 2121.3)	15.9971
(+)-<i>epi</i>-&beta;-santalene	1	1	1	1	1	1	269657	1	1	1	1	1	1	1	1	1	264913	1	598743	1	CPD-13475	CPD-13475 [ C15H24, tgt= ]			(227.17622, 23189.447)(228.17937, 1921.4366)	7.853
6-gingerol	1	1	1	1	1	1	1	1	1	1	103527	1	336166	189762	235627	1	128195	96325	142061	1	CPD-13494	CPD-13494 [ C17 H26 O4, tgt=39.23, overall=39.23 ]			(276.17184, 4212.665)(296.20087, 9123.561)(297.20374, 1727.74)(294.21457, 11973.637)(295.2179, 1172.76)(317.1797, 12702.654)(318.18256, 496.45)(304.17804, 19087.21)	11.5463
1-(3,4-dihydroxyphenyl)-5-hydroxy-3-decanone	2205196	867862	1488878	1889095	1154013	1759190	1983626	1283809	2214930	1565862	1284056	2472898	970376	2578770	2262036	815164	1636681	1363547	1720832	871692	CPD-13495	CPD-13495 [ C16 H24 O4, tgt=80.50, overall=80.50 ]			(280.1672, 1203.32)(263.16498, 76090.06)(264.16824, 11193.091)(265.1717, 295.375)(285.14655, 10116.5625)(286.15018, 889.61127)	13.033
&gamma;-Glu-Cys-&gamma;-Glu-Cys-&beta;-Ala	223692	1	1	1	1	1	3820500	1	1	345808	1191934	96577	247427	1	495762	1	314896	1205427	259223	1	CPD-13498	CPD-13498 [ C19 H29 N5 O10 S2, tgt=62.10, overall=62.10 ]			(570.18115, 53436.625)(570.1876, 14907.6)(571.18896, 4065.28)(557.1531, 1808.2)(575.1305, 796.05194)(557.121, 13348.919)(558.3226, 2683.802)(559.12085, 1461.7324)	6.442
quercetin 3-galactoside	199381	1	1	1	1	1	1	1	1	1	1	1	199920	1	325430	1	1	1	1	1	CPD-13509	CPD-13509 [ C21 H19 O12, tgt=0.38, overall=0.38 ]			(445.0863, 1858.3634)(447.1004, 556.17)(471.08456, 1117.75)	1.588
sakuranin	573821	416911	656512	655946	349067	296271	1	328468	489202	858991	1	183073	739504	281230	689688	509858	1	1	1	238739	CPD-13510	CPD-13510 [ C22 H24 O10, tgt=84.52, overall=84.52 ]			(453.34805, 33318.9)(455.15344, 179141.77)(467.1864, 5336.525)(471.12686, 24428.066)(472.12946, 3938.4426)(473.12827, 959.3566)	3.845
rhamnetin	1609290	1	1	1	1	1	1	1170580	1	320715	388995	1087436	1446676	1	1798545	1	1	1	1	1	CPD-13511	CPD-13511 [ C16 H12 O7, tgt=67.63, overall=67.63 ]			(317.06198, 67397.54)(318.065, 5191.046)(303.0518, 270.88)(317.0694, 16642.34)(318.0704, 3264.66)(339.1084, 6392.2)(319.0809, 2133.53)(321.038, 6389.77)	3.65741
N<sup>&omega;</sup>-hydroxy-L-arginine	949472	1771628	1529237	219057	1261014	640912	189237	605002	1075517	1	1	1	1204073	1252702	1200067	1187190	310984	123963	1	513798	CPD-13518	CPD-13518 [ C6 H15 N4 O3, tgt=49.34, overall=49.34 ]			(193.3516, 2212.8752)(194.11804, 1604.65)(193.1223, 1218.25)(178.12285, 24829.67)(179.1264, 1823.675)(209.1539, 23445.826)(210.15694, 2479.63)(191.14258, 14188.407)(192.14584, 1628.1499)(219.1129, 493.96)(197.09229, 2690.4443)(198.1001, 1547.9056)	5.9812
kauralexin A1	1	1	1	1	1	1	1866382	1	1	1	3594383	1	1	1	337138	1	1	1967391	2328993	256018	CPD-13539	CPD-13539 [ C20 H31 O2, tgt= ]			(306.2403, 2244.3525)(307.2425, 191.68)(304.24826, 16248.16)(305.25134, 1144.1849)(321.25928, 36904.734)(322.262, 2770.01)(313.23465, 790.7)	14.3343
kauralexin A3	876843	968920	1601325	891757	947185	994791	941646	1200587	1208071	947546	1068305	1091261	1232297	844198	800084	466992	487494	1093545	448285	1168814	CPD-13541	CPD-13541 [ C20 H29 O3, tgt=66.95, overall=66.95 ]			(317.27234, 29087.594)(318.27554, 4030.0457)(301.20734, 278.04)(318.2178, 13473.506)(319.2211, 1135.81)(336.2549, 2917.29)(318.2404, 170871.48)(319.2433, 31730.996)(326.1999, 95.11)	17.1055
kauralexin B1	1	1	1	1	1	1	1	1	1	1	3357770	1	1	1	1	1	1	2047158	2168953	1	CPD-13542	CPD-13542 [ C20H29O2, tgt= ]			(285.22183, 9615.233)(288.89893, 853.5867)(289.2321, 2954.4)(320.2549, 484.91)(301.23303, 67674.79)(302.24146, 9342.689)(303.2493, 174.57)(309.2041, 155.78)	17.683
kauralexin B2	1	1	1	1	1	161793	1	1	1	250289	1	1	259733	1	498996	157628	1	1	109517	1	CPD-13543	CPD-13543 [ C20 H26 O4, tgt=51.13, overall=51.13 ]			(330.1738, 2407.616)(315.1803, 236.09)(354.3423, 5583.35)(355.3408, 20372.312)(356.51413, 5340.4185)(357.5233, 6286.522)(358.19223, 848.2625)	6.2435
kauralexin B3	1595720	1141648	2265857	1705940	1267211	1146773	429295	1820633	2099324	1680379	1	1354079	3358838	1086274	1687126	540194	477357	616689	283898	1750839	CPD-13544	CPD-13544 [ C20 H27 O3, tgt=73.00, overall=73.00 ]			(315.19376, 63625.0)(316.1972, 10396.4)(317.20078, 914.02496)(318.30145, 1118.5862)	16.284
&alpha;-D-mannopyranose	1	1	1	1	579474	1	4034488	714080	807070	1381265	1952619	1057083	2617141	1	2962709	1	992016	1541347	1	1	CPD-13559	CPD-13559 [ C6H12O6, tgt= ]			(183.50024, 3534.077)(184.0742, 4771.985)(164.80627, 6511.4673)(166.0583, 486.96)(184.0737, 5368.1196)(163.06088, 2183.1716)(198.09723, 1893.1017)(180.08766, 3558.723)(203.05348, 47573.883)(204.05641, 1929.389)(205.04846, 326.99002)(188.18808, 1516.0829)(189.0462, 428.8)	1.828
zealexin A1	1	1	1	1	1	1	167380	1	1	1	108476	1	1	1	1	1	1	1	1	1	CPD-13573	CPD-13573 [ C15H21O2, tgt= ]			(233.1536, 8811.351)(251.18365, 1651.44)	7.2381
2-[(2<i>R</i>,5<i>Z</i>)-2-carboxy-4-methylthiazol-5(2<i>H</i>)-ylidene]ethyl phosphate	232551	184192	231200	634080	312103	425573	212091	394809	620059	422302	397785	214153	179149	661007	291209	538132	276964	1	305903	702465	CPD-13575	CPD-13575 [ C7 H7 N O6 P S, tgt=48.99, overall=48.99 ]			(267.97217, 546.438)(247.21143, 2053.2925)(247.9597, 1890.92)(248.9601, 625.015)(268.98282, 38199.285)(269.98584, 1037.8926)(250.63538, 1645.4551)(251.9729, 2607.69)(287.00266, 1309.7424)(286.957, 1788.4467)(268.9476, 27323.623)	1.648
2-(2-carboxy-4-methylthiazol-5-yl)ethyl phosphate	232551	184192	231200	634080	312103	425573	212091	394809	620059	422302	397785	214153	179149	661007	291209	538132	276964	1	305903	702465	CPD-13576	CPD-13576 [ C7 H7 N O6 P S, tgt=48.99, overall=48.99 ]			(267.97217, 546.438)(247.21143, 2053.2925)(247.9597, 1890.92)(248.9601, 625.015)(268.98282, 38199.285)(269.98584, 1037.8926)(250.63538, 1645.4551)(251.9729, 2607.69)(287.00266, 1309.7424)(286.957, 1788.4467)(268.9476, 27323.623)	1.648
cetyltrimethylammonium	349529	1	300543	389990	310754	303000	838710	307517	334950	371627	637913	321889	321117	503318	515595	1	1470523	519464	528024	413047	CPD-13595	CPD-13595 [ C19 H42 N, tgt=58.68, overall=58.68 ]			(284.33163, 21022.492)(285.33493, 2480.1868)	19.206
homoisoalliin	90029	133790	1	1	1	104821	218734	1	99172	113431	1	1	96945	133514	105475	1	257760	1	391793	1	CPD-13604	CPD-13604 [ C7 H13 N O3 S, tgt=47.02, overall=47.02 ]			(177.0551, 1011.0967)(216.23169, 17348.252)(219.0504, 501.155)(209.09271, 3467.5935)(192.0662, 3841.82)(201.04404, 8209.75)(193.08076, 4758.793)	2.91487
(<i>E</i>)-1-butenesulfenate	183418	1559828	1614875	1712394	1507420	1198675	21139468	1407162	29289744	1088677	17395858	4958247	21581524	1483876	26121900	7621827	12136013	20027568	249563	1113451	CPD-13605	CPD-13605 [ C4 H8 O S, tgt=71.11, overall=71.11 ]			(124.06017, 1203.9474)(106.0506, 323.46)(131.35579, 6801.0337)(132.02106, 2740.995)(110.009476, 165067.03)(112.007065, 20411.557)	1.602
(Z)-butanethial S-oxide	183418	1559828	1614875	1712394	1507420	1198675	21139468	1407162	29289744	1088677	17395858	4958247	21581524	1483876	26121900	7621827	12136013	20027568	249563	1113451	CPD-13606	CPD-13606 [ C4 H8 O S, tgt=71.11, overall=71.11 ]			(124.06017, 1203.9474)(106.0506, 323.46)(131.35579, 6801.0337)(132.02106, 2740.995)(110.009476, 165067.03)(112.007065, 20411.557)	1.602
3-dehydrosphinganine (C20)	887096	1025142	1520104	760820	1305117	2816991	14680074	729756	416540	672932	32702924	3114045	506139	1013955	1093554	623144	5268210	18352138	20530140	1521068	CPD-13610	CPD-13610 [ C20 H42 N O2, tgt=55.03, overall=55.03 ]			(329.32742, 55044.426)(330.33023, 9509.277)(331.3346, 411.12)(310.31113, 509933.3)(311.3142, 105457.87)(312.31836, 11941.104)(329.3281, 17608.48)(330.3316, 19160.62)(331.3343, 852.12)(351.3124, 4468.669)(352.31534, 530.30426)(353.32684, 106.59)(333.2956, 21149.504)(334.30167, 813.61255)	8.4278
sphinganine (C20)	677393	290258	632145	797081	583878	649080	710172	852621	557081	664964	1002277	579485	694344	1142866	1316337	542231	708238	1240998	1018983	446234	CPD-13611	CPD-13611 [ C20 H44 N O2, tgt=78.41, overall=78.41 ]			(312.32675, 25167.07)(313.32986, 3722.4265)(353.3277, 24043.473)(354.33047, 3824.3704)(355.3426, 518.89716)	8.73665
sphinganine (C18)	1113787	434490	1116192	749422	967837	1210399	38098140	1216669	1012759	733821	64604856	1001497	368831	1149360	1227021	508112	47014280	46626508	46508352	692667	CPD-13612	CPD-13612 [ C18 H40 N O2, tgt=80.56, overall=80.56 ]			(284.2956, 353933.06)(285.29874, 66506.45)(286.30176, 23841.875)(307.28024, 10207.389)	20.581
L-<i>threo</i>-sphinganine (C18)	1113787	434490	1116192	749422	967837	1210399	38098140	1216669	1012759	733821	64604856	1001497	368831	1149360	1227021	508112	47014280	46626508	46508352	692667	CPD-13613	CPD-13613 [ C18 H40 N O2, tgt=80.56, overall=80.56 ]			(284.2956, 353933.06)(285.29874, 66506.45)(286.30176, 23841.875)(307.28024, 10207.389)	20.581
isoprenyl alcohol	136819632	110818448	118730688	114380480	47823672	121534288	135381696	119761192	153252768	124826376	120580560	122951840	114853776	140927360	155214944	141082512	140453136	120900072	127914016	122529496	CPD-13614	CPD-13614 [ C5 H10 O, tgt=91.39, overall=91.39 ]			(104.10787, 3919773.5)(105.11107, 220559.92)(106.112755, 11461.286)	1.604
[(4S)-4-(5,5-dimethylcyclohex-1-en-1-yl)-cyclohex-1-en-1-yl] methanol	264594	230076	1915653	2031942	182952	251328	321573	200081	4738625	223477	726935	242490	313464	6228458	294028	4358479	325863	852431	1	150157	CPD-13626	CPD-13626 [ C15 H24 O, tgt=42.96, overall=42.96 ]			(221.18645, 54200.98)(222.1902, 16802.72)(221.18913, 72095.14)(222.19032, 27194.357)(223.1922, 1448.04)(203.18051, 7500.6255)(204.1834, 241.995)(245.18134, 2676.4055)(246.38095, 707.964)(228.17084, 1226.2001)	5.3816
(4S)-4-(5,5-dimethylcyclohex-1-en-1-yl)cyclohex-1-ene-1-carbaldehyde	2159924	2687568	1983304	1882154	614509	769413	2989652	729180	2654276	3102646	3157717	1027167	2314521	643211	2641599	2061253	3362978	2166752	3099616	1248842	CPD-13627	CPD-13627 [ C15 H22 O, tgt=77.00, overall=77.00 ]			(221.47295, 5498.177)(222.1901, 413.33)(241.15547, 63282.492)(242.15845, 7077.685)(226.15533, 418.64664)	2.138
9,10-epoxy-12-cis-octadecenoate	1	1	1	1	1	1	1	1	1	1	559425	1	1	1	1	1	1	1	336472	1	CPD-13636	CPD-13636 [ C18H31O3, tgt= ]			(295.22705, 18924.164)(296.22974, 2511.795)(277.21664, 9556.64)(278.2195, 1139.41)	10.812
<i>N<sup>5</sup></i>-acetyl-L-ornithine	1	1	1	1	1	1	603698	1	1	1	467890	1	1	1	1	1	1	1	1	1	CPD-13644	CPD-13644 [ C7H14N2O3, tgt= ]			(192.13855, 27368.77)(193.14165, 2370.315)(177.1272, 1524.16)(184.09355, 1363.38)	10.934
4-coumaroylhexanoylmethane	1	1	1	1	1	1	1	1	1	1	1	111958	1	1	133412	1	113750	1	1	1	CPD-13647	CPD-13647 [ C16 H20 O3, tgt= ]			(245.1389, 323.68)(278.1696, 7792.19)(266.12454, 1587.59)(267.121, 1784.4967)(269.1368, 5186.53)	5.22
pyrethrin I	493049	361655	1191996	762198	449172	255196	1	325659	450991	1	116031	945993	419502	1	228018	320528	119120	110521	1	645377	CPD-13655	CPD-13655 [ C21 H28 O3, tgt=55.88, overall=55.88 ]			(329.2092, 23423.52)(330.2124, 3395.1877)(314.20905, 2197.695)(331.22412, 5368.09)(314.2082, 3412.52)(348.2376, 10025.24)(333.2401, 1164.5437)(338.2004, 9102.545)	18.503
(S)-pyrethrolone	116833	3491892	2189447	405755	2765138	963208	113437	1014769	1025485	103194	6748096	95590	114790	221157	128126	1893313	641425	1025393	492866	2155849	CPD-13661	CPD-13661 [ C11 H14 O2, tgt=81.51, overall=81.51 ]			(180.10246, 3781.8699)(163.09685, 1232.343)(178.12361, 58796.332)(179.12663, 7359.691)(205.0985, 1000372.7)(206.10152, 118557.85)	3.613
(1R)-trans-chrysanthemate	1	1	1	1	1	1	1	1	1	1	1664180	1	1	1	1	1	1	1702980	1	1	CPD-13662	CPD-13662 [ C10H15O2, tgt= ]			(170.6241, 920.765)(172.12924, 884.55005)(173.1326, 2158.69)(187.1482, 1962.17)(168.138, 2045.96)	17.898
11-oxo-&beta;-amyrin	1	1	1	1	1	1	109396	1	1	1	136898	1	1	1	1	1	1	1	1	1	CPD-13667	CPD-13667 [ C30H48O2, tgt= ]			(424.36218, 8352.5)(425.37006, 2886.545)	17.43
11&alpha;,30-dihydroxy-&beta;-amyrin	154467	331240	347760	98671	152860	279734	1	249111	279731	120747	1	243856	1	112111	132572	1	1	1	1	175776	CPD-13669	CPD-13669 [ C30 H50 O3, tgt=36.13, overall=36.13 ]			(441.35565, 6965.3857)(443.86346, 3187.17)(445.3675, 3648.935)(480.4255, 9095.509)(481.4283, 1355.5566)(484.44922, 53695.984)(485.45163, 10037.83)(464.34457, 14058.196)	19.9886
30-hydroxy-11-oxo-&beta;-amyrin	5973154	3591317	3968432	5522016	149227	4871386	1	2919496	4087868	1	657105	3633135	109428	3563715	5970591	8003877	1	824170	1148608	173953	CPD-13670	CPD-13670 [ C30 H48 O3, tgt=29.84, overall=29.84 ]			(456.3691, 30235.863)(457.37207, 7497.7217)(439.5593, 5850.734)(441.3592, 943.615)(463.37708, 481.69336)(440.3578, 7193.96)(482.7156, 1576.4642)(483.36743, 2732.6099)(462.32947, 27969.346)(462.32837, 8288.34)(463.3277, 661.18)	19.5096
2-naphthol glucoside	193697	1	1	1	1	1	1	1	101142	284305	1	159192	493916	1	764275	123133	369681	1	337456	1	CPD-13683	CPD-13683 [ C16 H18 O6, tgt=47.59, overall=47.59 ]			(306.11237, 2623.295)(307.11154, 913.80505)(289.89713, 5891.7603)(312.13174, 1133.3871)(294.11908, 1401.41)(314.0931, 6212.936)(316.0996, 264.56)	7.72455
2-naphthol 6'-O-malonylglucoside	1	1	1	1	1	1	1	1	1	363325	1	1	1	1	1	1	1	1	1	1	CPD-13685	CPD-13685 [ C19 H19 O9, tgt=23.30, overall=23.30 ]			(395.1021, 751.64)(374.0986, 173.08)(415.0997, 918.01)(396.0698, 11769.9)	1.844
1-naphthol glucoside	1	1	1	1	1	1	1	1	101142	1	1	1	493916	1	764275	123133	369681	1	337456	1	CPD-13686	CPD-13686 [ C16H18O6, tgt= ]			(306.11237, 2623.295)(307.11154, 913.80505)(289.89713, 5891.7603)(312.13226, 499.90747)	8.724
4-methylumbelliferone 6'-O-malonylglucoside	1	1	1	1	1	1	3027141	1	116165	287293	1461124	1	1	1	1	286207	484408	884189	400467	1	CPD-13688	CPD-13688 [ C19 H19 O11, tgt= ]			(406.0853, 11800.684)(407.0882, 1065.72)(441.12122, 464.96335)(423.1263, 59088.164)(424.12933, 9768.678)(425.13205, 2071.145)	5.60475
adenosine 5'-phosphoselenate	1	1	1	1	1	1	1	1	1	1	400249	1	1	1	1	1	1	1	1	1	CPD-13713	CPD-13713 [ C10 H13 N5 O10 P Se, tgt= ]			(474.9315, 26971.14)(475.9341, 1221.89)	17.366
L-selenocystathionine	757406	285117	834949	784539	726028	784762	545837	687475	1161794	811976	537133	752399	611941	1016297	839431	777033	741293	532045	682719	357165	CPD-13717	CPD-13717 [ C7 H14 N2 O4 Se, tgt=62.24, overall=62.24 ]			(264.51944, 18191.793)(265.5181, 20447.97)(266.51617, 7446.0537)(267.51547, 3804.1472)(268.93884, 765.87994)(271.01547, 1254.0358)(275.22018, 3332.9858)(273.0079, 1134.95)(254.8275, 2282.9553)(258.15323, 1725.3414)(260.2607, 456.85248)(265.02008, 19861.99)(277.0277, 13775.645)(278.0372, 527.24)(279.034, 158.93)(255.51196, 2271.9177)(257.0173, 776.83997)(286.5434, 2805.0715)(296.06683, 48955.516)(…	1.408
dimethylselenopropanoate-amine	238518	1535378	105849	18087804	16551011	15623103	16691884	232373	153636	401573	258539	828710	949153	1362737	126735	1079687	647668	433319	16600547	271177	CPD-13719	CPD-13719 [ C5 H15 N Se, tgt=55.25, overall=55.25 ]			(166.03763, 14839.8955)(164.04315, 2053.15)(177.0565, 9924.186)(168.31807, 21447.416)(170.76463, 2114.2258)(184.22217, 126492.08)(185.96667, 31800.48)(187.29152, 26622.496)(188.67244, 3396.772)(197.61996, 6969.3174)(200.90129, 6644.612)	2.54195
3-dimethylselenopropionaldehyde	369406	377774	522082	302565	247331	220059	164907	435661	300350	346698	219435	320014	484633	246861	425508	318688	129287	1	220561	462105	CPD-13720	CPD-13720 [ C5 H11 O Se, tgt=49.73, overall=49.73 ]			(169.31638, 9635.971)(169.00145, 403.82)(167.01869, 8460.883)(175.01904, 25608.205)(149.53319, 6666.334)(154.67937, 7998.47)(158.02179, 1736.415)(159.0231, 6771.325)(182.68144, 4059.689)(184.02995, 4286.615)(189.0404, 604.44)(168.74065, 2352.385)(171.45718, 736.25287)(189.77467, 10349.067)(187.99261, 6757.9604)(190.22469, 1132.2347)(196.87929, 839.8713)(197.0066, 1131.01)(170.83694, 3224.0952)(17…	2.273
dimethylselenoniopropanoate	1494937	347780	416410	320761	503848	1544032	1205847	294795	394375	90402	892703	188409	119592	420582	173865	247412	1502750	1168655	1681149	442748	CPD-13770	CPD-13770 [ C5 H10 O2 Se, tgt=44.01, overall=44.01 ]			(179.985, 1631.5328)(183.9906, 4102.785)(188.99185, 924.255)(157.9776, 1394.145)(178.9963, 7719.6978)(179.99483, 1332.4175)(180.99377, 781.55664)(161.98071, 3809.1685)(205.87581, 2711.4053)(206.029, 2916.95)(176.01166, 78350.95)(177.09105, 9437.964)(178.01051, 5016.199)(200.97359, 12603.471)(201.97487, 3146.3542)(202.97185, 3696.0798)(182.96327, 47843.23)(183.96436, 12595.532)(184.96155, 13164.52…	1.67
(7Z,10Z,13Z,16Z,19Z)-docosa-7,10,13,16,19-pentenoate	1	1	1	1	1	1	377705	1	1	1	400297	1	1	1	1	1	1	345991	1	1	CPD-13792	CPD-13792 [ C22 H33 O2, tgt= ]			(352.2455, 16675.525)(353.24863, 1916.1367)	9.505
DIBOA-&beta;-D-glucoside	324160	379541	329509	125360	90057	146571	565290	154501	345691	403717	436591	106467	167515	96182	145781	257397	534760	281494	500961	144784	CPD-13811	CPD-13811 [ C14 H17 N O9, tgt=55.28, overall=55.28 ]			(366.5799, 533.07)(365.1303, 458.68)(344.09128, 8596.996)(348.0707, 7169.6836)(349.0647, 1369.7441)	2.059
TRIBOA-&beta;-D-glucoside	1370267	247455	266761	383848	182361	526560	232849	474143	330003	1483706	303825	997583	1605458	456502	2017335	516109	197464	236398	275601	280742	CPD-13812	CPD-13812 [ C14 H17 N O10, tgt=47.24, overall=47.24 ]			(362.08508, 570.86)(344.0912, 1771.0508)(364.35028, 9362.298)(365.1056, 38517.95)(344.0923, 3149.2168)(382.0833, 42288.875)(383.08, 18916.86)(384.08304, 905.41504)(367.0744, 353.41)	1.775
2-hydroxy-dATP	1	1	487587	1	1	1	1	1	1	1	1	1	1	1	1	1	1	1	1	1	CPD-13851	CPD-13851 [ C10 H12 N5 O13 P3, tgt= ]			(505.007, 6977.39)(506.0093, 224.35)	2.044
sesquithujene	1	1	1	1	1	1	269657	1	1	1	1	1	1	1	1	1	264913	1	598743	1	CPD-13875	CPD-13875 [ C15H24, tgt= ]			(227.17622, 23189.447)(228.17937, 1921.4366)	7.853
&alpha;-seco-amyrin	1	1	1	1	1	1	159069	1	1	1	667508	1	1	1	1	1	1	523717	447982	1	CPD-13882	CPD-13882 [ C30H50O, tgt= ]			(427.39233, 3755.275)(428.3956, 1811.66)(409.38196, 4673.8525)(410.3849, 967.8)	23.404
&beta;-seco-amyrin	1	1	1	1	1	1	159069	1	1	1	667508	1	1	1	1	1	1	523717	447982	1	CPD-13883	CPD-13883 [ C30H50O, tgt= ]			(427.39233, 3755.275)(428.3956, 1811.66)(409.38196, 4673.8525)(410.3849, 967.8)	23.404
&delta;-amyrin	1	1	1	1	1	1	159069	1	1	1	667508	1	1	1	1	1	1	523717	447982	1	CPD-13885	CPD-13885 [ C30H50O, tgt= ]			(427.39233, 3755.275)(428.3956, 1811.66)(409.38196, 4673.8525)(410.3849, 967.8)	23.404
dehydroascorbate (bicyclic form)	7532561	15592233	7963459	11826579	5497875	9073092	381343	3643991	4463361	6151278	593822	3681034	6613485	9620805	5456984	7303396	1	72485	1	3741354	CPD-13907	CPD-13907 [ C6 H8 O7, tgt=88.56, overall=88.56 ]			(175.01965, 18622.766)(177.02362, 15330.06)(215.01741, 246173.86)(216.02057, 17457.889)(175.02327, 41252.902)(176.02676, 1157.7693)(177.0223, 1908.3833)(210.06168, 67960.73)(211.06456, 7767.6826)(212.06546, 592.47125)(193.03502, 33540.223)(194.03807, 952.52997)(198.01285, 518.1)(192.05536, 531.105)	1.95105
glutathioselenol	240665	272146	243042	270625	264906	363731	349835	204744	357563	250532	305753	211621	307731	272037	274480	366398	392209	333323	403915	239582	CPD-13909	CPD-13909 [ C10 H16 N3 O6 S Se, tgt=50.06, overall=50.06 ]			(388.99612, 4347.968)(388.99396, 5155.0864)(365.00174, 11196.44)(407.5587, 59675.434)(408.2689, 15708.388)(409.0241, 34473.652)(410.02728, 3525.6514)(388.29092, 1578.5364)(389.0189, 933.32)(404.98468, 408.46997)(388.25467, 680.13916)	1.925
cyclic- 3,4-<i>O</i>-oxalyl-L-threonate	218037	368934	277277	343135	267508	336491	1	272721	385509	241855	120490	118923	266856	252356	136310	333839	1	1	97398	220771	CPD-13910	CPD-13910 [ C6 H5 O7, tgt=74.23, overall=74.23 ]			(189.47693, 4324.6724)(190.01396, 5222.9727)(191.0133, 1567.39)(175.51073, 2074.7917)(212.0432, 2159.12)(193.03514, 24224.266)(194.03827, 568.13904)(214.003, 3136.97)	2.098
4-<i>O</i>-oxalyl-L-threonate	512126	425760	210575	206095	321663	122322	1	340357	174837	579080	1	383126	606447	160705	494795	118622	1	1	1	293958	CPD-13911	CPD-13911 [ C6 H6 O8, tgt=47.34, overall=47.34 ]			(208.00699, 744.22003)(187.99286, 5710.498)(188.99207, 717.37)(212.0283, 468.75)(189.00583, 4314.77)(190.013, 1802.79)(225.04301, 494.184)(227.04941, 585.605)(206.02841, 7412.609)(231.9966, 1595.85)	1.901
2-carboxy-L-<i>threo</i>-pentonate	248024	212789	1	181063	158975	314406	724059	110063	315964	200424	904986	1	1	166387	1	1	750449	740916	760815	131649	CPD-13912	CPD-13912 [ C6 H8 O8, tgt=39.29, overall=39.29 ]			(190.01375, 4046.0415)(212.04236, 592.9)(191.01424, 786.588)(229.0567, 689.63995)(210.55286, 591.95)(231.71034, 3547.3728)(214.0044, 1305.9963)	2.145
2-carboxy-L-xylonolactone	303206	1	1	1	1	1	127296	183058	1	1	132299	1	417915	1	91924	1	121065	130329	142716	1	CPD-13913	CPD-13913 [ C6 H7 O7, tgt=34.67, overall=34.67 ]			(191.0147, 1636.2484)(175.44046, 15696.068)(176.0117, 46460.93)(177.0217, 7076.65)(193.03523, 9767.204)(175.02115, 21468.295)(177.0246, 750.66)(210.06169, 18965.72)(191.04124, 4390.2476)(192.0564, 354.84)(214.00404, 2578.5156)(198.50327, 1445.605)(200.0013, 138.35)	1.949
cyclic-2,3-<i>O</i>-oxalyl-L-threonate	218037	368934	277277	343135	267508	336491	1	272721	385509	241855	120490	118923	266856	252356	136310	333839	1	1	97398	220771	CPD-13914	CPD-13914 [ C6 H5 O7, tgt=74.23, overall=74.23 ]			(189.47693, 4324.6724)(190.01396, 5222.9727)(191.0133, 1567.39)(175.51073, 2074.7917)(212.0432, 2159.12)(193.03514, 24224.266)(194.03827, 568.13904)(214.003, 3136.97)	2.098
(-)-9&beta;-pimara-7,15-dien-19-ol	156406	1	271548	227245	179691	1	2260777	296534	300654	213525	1	223727	486317	1	525047	1	2793624	2697143	2652497	331136	CPD-13921	CPD-13921 [ C20 H32 O, tgt=36.63, overall=36.63 ]			(292.2649, 938.31995)(292.26755, 2016.425)(306.27734, 41827.707)(307.2805, 6821.6377)(293.2842, 2807.125)(313.23788, 1406.582)(295.22754, 16540.008)(296.23093, 1986.1273)	13.3398
(-)-9&beta;-pimara-7,15-dien-19-al	1	1	1	1	1	1	60234960	1	1	1	92570360	1	1	1	1	1	75142008	70424904	74330232	1	CPD-13922	CPD-13922 [ C20 H30 O, tgt= ]			(288.2452, 432.56)(291.2579, 2508.45)(304.2622, 2416513.2)(305.2656, 477389.06)(306.27243, 62558.2)(307.27997, 5430.2417)(291.2679, 334.82)(295.2267, 1020.36)	19.366
(-)-9&beta;-pimara-7,15-dien-19-oate	1	1	1	1	1	1	1	1	1	1	3357770	1	1	1	1	1	1	2047158	2168953	1	CPD-13923	CPD-13923 [ C20H29O2, tgt= ]			(285.22183, 9615.233)(288.89893, 853.5867)(289.2321, 2954.4)(320.2549, 484.91)(301.23303, 67674.79)(302.24146, 9342.689)(303.2493, 174.57)(309.2041, 155.78)	17.683
taxusin	1	655319	13547881	338143	323569	1	1	1	15462618	13713997	18941316	14699508	12466709	1	11684432	1	17738056	320809	1	311997	CPD-13925	CPD-13925 [ C28H40O8, tgt= ]			(528.2693, 563442.56)(529.27466, 203610.61)(531.20435, 17546.135)(531.27576, 1024.965)(533.293, 1773.2)(511.7511, 635.645)	8.22435
7&beta;-hydroxytaxusin	1	1	1	1	1165871	1	1475162	1	1	1240217	1139670	1	1314353	1	1	1	1786205	1316531	1279456	1	CPD-13926	CPD-13926 [ C28H40O9, tgt= ]			(522.27136, 3103.28)(523.27905, 3029.5967)(524.28265, 911.8467)(525.2922, 931598.2)(526.29736, 359793.62)(502.50977, 589.1175)(522.2728, 3585.468)(523.2804, 5403.094)(524.28296, 1123.6019)(525.2936, 1213753.0)(526.2999, 873702.1)(527.3018, 150744.06)(503.25647, 2022.8568)(540.8013, 84859.766)(541.8075, 47908.645)(542.63916, 8534.365)(544.74817, 3192.3323)(546.25586, 1306.9266)(531.2538, 769.23663)	8.682
(13<i>E</i>)-labda-7,13-dien-15-ol	1	1	1	1	1	1	4241189	1	1	1	9632553	1	1	1	1	1	7690614	5151410	5998910	1	CPD-13929	CPD-13929 [ C20 H34 O, tgt= ]			(291.26892, 14647.79)(292.26483, 7802.285)(293.2649, 977.8875)(273.25836, 1002.125)(291.2682, 23576.43)(273.2577, 2891.65)(308.29572, 183697.86)(309.2987, 38099.562)(310.30182, 2535.406)(314.2625, 1161.37)	19.783
<i>N</i>-hydroxyhexahomomethioniate	167577	1	136366	152941	1	156813	312218	166490	167324	236022	304045	148663	179365	182822	185561	1	1	210487	617649	1	CPD-14036	CPD-14036 [ C11 H22 N O3 S, tgt=47.54, overall=47.54 ]			(231.12048, 17013.773)(232.1251, 1541.68)(250.57083, 5565.9673)(251.14009, 1546.9624)(234.13452, 282.14667)(267.1708, 4555.46)(249.15802, 5400.33)(271.1161, 8463.91)(253.11198, 628.8566)	3.694
<i>N</i>,<i>N</i>-dihydroxyhexahomomethioniate	1882674	1	1	1846885	1111551	1478573	2038132	1375679	1915251	2424500	2607725	1479422	2148693	731173	2026120	1	2058679	1489113	1	1610146	CPD-14037	CPD-14037 [ C11 H22 N O4 S, tgt=55.50, overall=55.50 ]			(266.12402, 2494.0476)(247.11806, 94181.72)(248.12123, 9701.134)(247.1301, 1084.82)(282.15475, 3508.7393)(269.161, 208.2)(287.11093, 5269.092)(269.10785, 60216.562)(270.10764, 8470.945)	7.7935
<i>N</i>-hydroxypentahomomethionine	298709	190375	194606	1	1	228714	221597	173996	1	297175	1	225043	350612	133276	247303	397167	155258	138216	199155	300222	CPD-14039	CPD-14039 [ C10 H20 N O3 S, tgt=24.68, overall=24.68 ]			(217.10527, 10004.705)(220.11862, 10409.88)(221.1202, 1719.71)(258.11115, 16616.945)(242.10039, 4753.8813)	2.449
<i>N</i>,<i>N</i>-dihydroxypentahomomethionine	1	662072	1229142	1	500245	1	1	832564	1	694207	498474	963419	590814	1	1	1	1	492730	1	1242207	CPD-14040	CPD-14040 [ C10 H20 N O4 S, tgt=44.94, overall=44.94 ]			(254.6167, 147.4475)(255.1214, 700.6)(234.1031, 58.61)(255.12022, 964.9575)(269.4834, 3599.3835)(271.151, 263.89)(277.09467, 176.41)(257.59424, 4226.225)(260.0937, 709.51)	5.49225
<i>N</i>-hydroxyhomomethionine	1	1	282695	95347	1	880375	2684319	156114	369678	2409935	467993	332904	286709	2203977	2202399	164211	300068	478688	163904	801123	CPD-14043	CPD-14043 [ C6H12NO3S, tgt= ]			(182.16315, 1033.0089)(182.0531, 1910.02)(161.97586, 31838.469)(163.42531, 11913.355)(164.37726, 961.2517)(182.0643, 1533.8546)(184.06128, 1797.935)(165.42674, 365.74625)(166.0495, 414.03)(198.41893, 797.95996)(181.41365, 4573.7085)(201.04442, 9226.102)(202.0524, 406.0)(183.21915, 3430.2568)	3.83111
<i>N</i>,<i>N</i>-dihydroxyhomomethionine	1	1	1	1	1	1	1	1	1	1	1	97596	165190	1	1	1	266530	1	177405	1	CPD-14046	CPD-14046 [ C6H12NO4S, tgt= ]			(176.03445, 8459.25)(213.0791, 1697.215)(214.0864, 1148.06)(197.05356, 1639.625)	3.2936
<i>N</i>-hydroxy-L-dihomomethionine	1	1	1	1	92823	259470	167556	166338	132717	1	190766	1	123593	323644	1	244218	184502	120424	115720	1	CPD-14047	CPD-14047 [ C7H14NO3S, tgt= ]			(193.07031, 4502.1313)(176.48563, 7185.7944)(196.74403, 1604.1449)(177.0648, 9684.083)(220.058, 1044.0775)(199.54901, 4161.2407)(200.2445, 3838.746)(201.0434, 540.91)	4.6454
<i>N</i>,<i>N</i>-dihydroxy-L-dihomomethionine	129275	180818	131698	1	127226	1	1	1	1	161659	1	173840	1	1	108965	1	1	1	1	151512	CPD-14048	CPD-14048 [ C7 H14 N O4 S, tgt=43.92, overall=43.92 ]			(208.0694, 1086.6)(190.051, 4500.54)(213.07536, 663.46)(231.05383, 5305.9585)(213.92398, 3278.0151)	3.96468
<i>N</i>-hydroxytrihomomethionine	37724368	524940	13197520	14593327	394862	12371841	224344	13614424	16911212	33680700	39118588	37238508	38798684	10736201	40988184	13305377	250573	28225126	32775848	11453823	CPD-14049	CPD-14049 [ C8 H16 N O3 S, tgt=75.45, overall=75.45 ]			(188.07262, 869402.56)(189.0748, 110014.23)(190.0774, 8138.1787)(189.08014, 6486.975)(227.11655, 13598.885)(228.11955, 1239.0701)(229.11526, 922.025)(211.0634, 10493.21)(212.0621, 423.52002)	3.7248
<i>N</i>, <i>N</i>-dihydroxytrihomomethionine	1	1	1	937309	469150	1	272022	1	1	1	301045	930296	987811	1	1060022	1	114842	240223	351726	1	CPD-14050	CPD-14050 [ C8 H16 N O4 S, tgt=25.50, overall=25.50 ]			(226.0822, 1299.7733)(205.08118, 21241.34)(206.08057, 1652.9248)	7.265
<i>N</i>-hydroxy-tetrahomomethionine	104634	87881	1	85398	1	1	1	1	683478	166110	441215	136424	136381	1072002	1	1	478991	470890	1	1	CPD-14051	CPD-14051 [ C9 H18 N O3 S, tgt=41.13, overall=41.13 ]			(222.096, 138.84)(205.09038, 3616.2832)(206.1026, 2029.8334)(220.11865, 17109.01)(221.12225, 1028.7949)(225.4107, 5578.372)	3.85062
<i>N</i>, <i>N</i>-dihydroxy-tetrahomomethionine	7047049	7262424	6424447	5846153	6161938	5653709	3862524	5107862	4990552	5937894	3820170	6087102	6551178	5062620	5028512	5328818	3832085	3474644	3985352	7195868	CPD-14052	CPD-14052 [ C9 H18 N O4 S, tgt=65.74, overall=65.74 ]			(241.0995, 56.44)(238.10538, 103.130005)(239.12337, 94.68667)(259.08795, 36818.984)(260.08835, 3111.745)(241.07234, 27144.85)(242.07555, 2716.6152)	8.623
(6<i>R</i>)-L-<i>erythro</i>-5,6,7,8-tetrahydrobiopterin	1	1	1	1	1	1	136544	1	1	1	1	1	1	1	1	1	1	126252	1	1	CPD-14053	CPD-14053 [ C9 H15 N5 O3, tgt= ]			(223.1077, 7323.52)(243.1338, 948.48)(259.1517, 6293.95)(267.1199, 1085.1)	4.907
3,6-dihydronicotinate	636343	2848555	948449	98723	553968	2717268	544799	341834	1068034	704517	393468	447747	828724	807462	526548	932909	426092	597598	2820836	2650770	CPD-14074	CPD-14074 [ C6 H6 N O2, tgt=47.57, overall=47.57 ]			(124.04036, 17602.895)(125.038, 1100.1066)(111.15823, 1384.0868)(112.05095, 395.80252)(142.07033, 3409.0732)(124.0605, 1339.17)(148.03041, 16931.957)(152.0372, 6545.66)(129.01994, 44460.344)(130.02272, 6099.42)	2.019
CDTA	365531	1	256744	216101	1	328040	171419	1	1	385730	399268	1	1	218945	237151	572816	166059	309636	225493	1	CPD-14080	CPD-14080 [ C14 H22 N2 O8, tgt=36.40, overall=36.40 ]			(347.13412, 2465.23)(328.37488, 4461.7275)(332.13803, 10900.013)(333.1433, 4255.585)(364.1755, 10236.75)(370.62643, 13396.643)(370.1227, 2080.5444)(353.1209, 424.96)	4.96815
3-oxo-myristate	1	1	1	1	1	1	1	1	1	1	1	318695	1	1	294150	1	197344	166518	220878	102855	CPD-14242	CPD-14242 [ C14H25O3, tgt= ]			(264.2314, 36886.41)(242.21191, 2246.8801)(264.16833, 13909.16)(265.1717, 332.3)	13.035
showacene	192080	109911	1	135184	184241	117946	1	1	1	164495	1	1	204188	1	156896	156824	1	1	1	201530	CPD-14261	CPD-14261 [ C31 H52, tgt=14.18, overall=14.18 ]			(447.40396, 8984.417)(448.4074, 958.96106)	21.618
3,20-dimethyl-1,2,21,22-tetradehydro-2,3,20,21-tetrahydrobotryococcene	1	1	1	1	1	1	735273	1	1	1	2514371	1	1	1	1	1	1644337	946764	1209781	1	CPD-14262	CPD-14262 [ C32 H54, tgt= ]			(456.46054, 75360.08)(457.4632, 10274.192)(458.4647, 305.12)(466.4405, 3850.05)	17.367
3-methyl-1,2-didehydro-2,3-dihydrosqualene	192080	109911	1	135184	184241	117946	1	1	1	164495	1	1	204188	1	156896	156824	1	1	1	201530	CPD-14263	CPD-14263 [ C31 H52, tgt=14.18, overall=14.18 ]			(447.40396, 8984.417)(448.4074, 958.96106)	21.618
3,22-dimethyl-1,2,23,24-tetradehydro-2,3,22,23-tetrahydrosqualene	1	1	1	1	1	1	735273	1	1	1	2514371	1	1	1	1	1	1644337	946764	1209781	1	CPD-14264	CPD-14264 [ C32 H54, tgt= ]			(456.46054, 75360.08)(457.4632, 10274.192)(458.4647, 305.12)(466.4405, 3850.05)	17.367
3-oxoicosanoyl-CoA	1	1	1	1	1	1	212278	1	1	1	1	1	1	254127	1	1	1	1	1	1	CPD-14271	CPD-14271 [ C41 H68 N7 O18 P3 S, tgt= ]			(1090.3633, 13527.564)(1091.365, 656.985)	16.521
C33 botryococcene	1	1	1	1	1	1	1	1	1	1	1	1	1	1	1	1	326182	1	1	1	CPD-14289	CPD-14289 [ C33H56, tgt= ]			(452.4298, 19616.71)(453.4327, 1827.02)	16.196
(11Z)-3-oxoicosa-11-enoyl-CoA	259116	140984	159691	171163	149648	139105	199868	171142	169167	202905	205118	195545	205992	169916	251834	191131	292486	224282	200812	155250	CPD-14300	CPD-14300 [ C41 H66 N7 O18 P3 S, tgt=51.15, overall=51.15 ]			(1069.3528, 3338.5374)(1070.3511, 3420.611)(1071.3501, 935.0156)(1069.3516, 3597.963)(1070.3499, 3231.2341)(1071.3486, 907.6925)	30.243
(+)-isoitalicene	1	1	1	1	1	1	269657	1	1	1	1	1	1	1	1	1	264913	1	598743	1	CPD-14342	CPD-14342 [ C15H24, tgt= ]			(227.17622, 23189.447)(228.17937, 1921.4366)	7.853
intermedeol	1	1	1	1	1	1	1111171	217104	1	1	2110130	1	325421	1	210663	1	2466537	1362949	1	1	CPD-14374	CPD-14374 [ C15 H26 O, tgt=71.08, overall=71.08 ]			(226.2163, 1376.06)(241.56801, 30678.775)(241.23567, 5914.457)(249.20569, 1293.3575)(227.17613, 13239.329)(228.1792, 270.69)	12.0713
eudesma-4,11-diene	1	1	1	1	1	1	269657	1	1	1	1	1	1	1	1	1	264913	1	598743	1	CPD-14376	CPD-14376 [ C15H24, tgt= ]			(227.17622, 23189.447)(228.17937, 1921.4366)	7.853
dehydrospermidine	613078	541368	583221	775860	1	650650	2690310	735733	610431	1	727163	1	1	1	717689	808750	2499948	633657	1916796	654719	CPD-14378	CPD-14378 [ C7 H20 N3, tgt=73.84, overall=73.84 ]			(146.16562, 43530.863)(147.1688, 2169.5486)	1.328
(+)-vernolate	1	1	1	1	1	1	1	1	1	1	559425	1	1	1	1	1	1	1	336472	1	CPD-14396	CPD-14396 [ C18H31O3, tgt= ]			(295.22705, 18924.164)(296.22974, 2511.795)(277.21664, 9556.64)(278.2195, 1139.41)	10.812
(3R)-hydroxydihomo &gamma;-linolenoyl-CoA	1	101879	116120	1	104877	90131	217692	119761	116932	1	131634	132105	121567	123038	165905	120307	1	144512	146958	112669	CPD-14405	CPD-14405 [ C41 H64 N7 O18 P3 S, tgt=19.89, overall=19.89 ]			(1090.3608, 12313.91)(1091.3619, 314.0)(1068.3507, 2916.108)(1069.3517, 3540.998)(1070.3506, 3299.136)(1071.3491, 940.435)	29.3875
dihomo &gamma;-linolenoyl-CoA	1	1	1	1	1	1	1	1	1	1	1	94984	97527	1	114507	95566	1	106672	1	1	CPD-14407	CPD-14407 [ C41 H64 N7 O17 P3 S, tgt= ]			(1069.3513, 3835.668)(1070.3501, 3444.17)(1071.3486, 900.1375)	30.241
(3R,11Z,14Z,17Z)-3-hydroxyicosatrienoyl-CoA	1	101879	116120	1	104877	90131	1	119761	116932	1	131634	132105	121567	123038	165905	120307	1	144512	146958	112669	CPD-14419	CPD-14419 [ C41H64N7O18P3S, tgt= ]			(1068.3507, 2916.108)(1069.3517, 3540.998)(1070.3506, 3299.136)(1071.3491, 940.435)	30.243
(5Z,8Z,11Z,14Z,17Z)-3-oxodocosapentaenoyl-CoA	1	1	1	1	1	1	429970	1	1	1	1	1	1	1	1	1	1	1	1	1	CPD-14423	CPD-14423 [ C43 H62 N7 O18 P3 S, tgt= ]			(1090.3608, 12313.91)(1091.3619, 314.0)	16.521
daphnetin	468148	525397	161509	137935	539555	593441	129447	121462	146111	509605	203049	401860	118394	497794	430072	751344	123421	134051	217396	574811	CPD-14427	CPD-14427 [ C9 H6 O4, tgt=51.80, overall=51.80 ]			(180.70703, 980.5634)(164.36555, 1656.6333)(166.03336, 547.85754)(204.97179, 8404.19)(205.12492, 2966.936)(206.0268, 10490.369)(183.0066, 14283.295)	1.923
daphnetin-8-glucoside	135921	269948	245818	288052	237397	265835	262465	283021	326878	205136	348062	274338	301658	243887	393882	238408	267592	296291	266377	207764	CPD-14428	CPD-14428 [ C15 H16 O9, tgt=44.06, overall=44.06 ]			(344.0918, 910.08435)(323.0747, 7842.37)(323.07416, 9937.047)(366.08514, 468.21503)(367.0756, 246.06999)(348.07065, 1063.1531)(349.0617, 4692.4443)(350.06314, 634.54333)	1.561
cichoriin	135921	269948	245818	288052	237397	265835	262465	283021	326878	205136	348062	274338	301658	243887	393882	238408	267592	296291	266377	207764	CPD-14429	CPD-14429 [ C15 H16 O9, tgt=44.06, overall=44.06 ]			(344.0918, 910.08435)(323.0747, 7842.37)(323.07416, 9937.047)(366.08514, 468.21503)(367.0756, 246.06999)(348.07065, 1063.1531)(349.0617, 4692.4443)(350.06314, 634.54333)	1.561
7-hydroxy-8-methoxycoumarin	826766	233333	209595	96134	1	122758	370678	228418	383511	1040931	1	247739	445394	207325	730975	1	488547	147583	170953	121089	CPD-14430	CPD-14430 [ C10 H8 O4, tgt=44.27, overall=44.27 ]			(192.0376, 12215.25)(175.03719, 2479.3315)(177.0357, 813.37)(175.03664, 3231.3901)(213.0787, 16761.75)(214.0862, 1957.09)(193.3216, 1089.5024)(216.87077, 575.82837)(198.02766, 5140.9526)(199.02357, 1033.635)	1.96488
4-<i>O</i>- &beta; -D-glucosyl-daphnetin	135921	269948	245818	288052	237397	265835	262465	283021	326878	205136	348062	274338	301658	243887	393882	238408	267592	296291	266377	207764	CPD-14431	CPD-14431 [ C15 H16 O9, tgt=44.06, overall=44.06 ]			(344.0918, 910.08435)(323.0747, 7842.37)(323.07416, 9937.047)(366.08514, 468.21503)(367.0756, 246.06999)(348.07065, 1063.1531)(349.0617, 4692.4443)(350.06314, 634.54333)	1.561
3-<i>O</i>-&beta;-D-glucosyl-daphnetin	135921	269948	245818	288052	237397	265835	262465	283021	326878	205136	348062	274338	301658	243887	393882	238408	267592	296291	266377	207764	CPD-14434	CPD-14434 [ C15 H16 O9, tgt=44.06, overall=44.06 ]			(344.0918, 910.08435)(323.0747, 7842.37)(323.07416, 9937.047)(366.08514, 468.21503)(367.0756, 246.06999)(348.07065, 1063.1531)(349.0617, 4692.4443)(350.06314, 634.54333)	1.561
(2S,4S)-4-hydroxy-2,3,4,5-tetrahydrodipicolinate	102079	127675	76832	143824	201402	230713	1	91489	333771	262582	120490	82197	145820	140632	610395	253209	1	1	97398	139347	CPD-14443	CPD-14443 [ C7 H7 N O5, tgt=53.11, overall=53.11 ]			(186.80139, 5542.011)(189.0461, 1081.0)(170.15106, 25064.426)(171.52875, 5103.204)(189.20247, 2030.4768)(189.04448, 1506.5599)(169.03574, 6358.46)(187.27902, 49494.367)(209.35974, 780.2489)(212.02841, 714.572)(190.54826, 3944.9219)(191.514, 870.73)	1.744
1,4-bis-{[N-(1-imino-1-guanidino-methyl)]sulfanylmethyl}-3,6-dimethyl-benzene	442404	1705285	1578752	1107702	1	1291028	865514	1666669	1878214	308342	1379618	570426	524283	1987100	378575	1124464	198881	1	1208610	1082553	CPD-14445	CPD-14445 [ C14 H26 N8 S2, tgt=59.91, overall=59.91 ]			(370.623, 13662.26)(371.17474, 1022.7575)(372.2655, 14936.604)(373.38232, 17934.262)(374.78525, 6143.52)(377.1645, 176.5)(391.43665, 8599.304)(392.19714, 4115.883)(393.1987, 456.54)(398.5925, 1285.8391)	3.46542
(1R,3R)-chrysanthemoyl CoA	125266	99129	93933	1	97763	112961	1	77232	98006	121394	80152	1	101991	139468	131185	142719	1	1	93250	1	CPD-14450	CPD-14450 [ C31 H46 N7 O17 P3 S, tgt=15.24, overall=15.24 ]			(935.214, 15687.779)(936.2168, 7528.7017)	6.895
scoparone	193508	177180	95361	167842	107994	121802	1	149575	120248	290933	166044	228876	247564	143745	267716	85506	1	1	1	118998	CPD-14452	CPD-14452 [ C11 H10 O4, tgt=46.97, overall=46.97 ]			(207.06636, 6675.0103)(190.05072, 1449.613)(207.06583, 11747.257)(208.06937, 739.895)(206.0817, 1647.86)(213.04199, 1547.579)	4.936
isoscopoletin	1	1	1	1	1	122758	1	1	1	1	1	247739	1	1	1	1	1	1	1	1	CPD-14453	CPD-14453 [ C10H8O4, tgt= ]			(192.0376, 12215.25)(213.0787, 16761.75)(214.0862, 1957.09)(195.0791, 1256.14)	4.214
4-<i>O</i>-&beta;-D-glucosyl-esculetin	135921	269948	245818	288052	237397	265835	262465	283021	326878	205136	348062	274338	301658	243887	393882	238408	267592	296291	266377	207764	CPD-14454	CPD-14454 [ C15 H16 O9, tgt=44.06, overall=44.06 ]			(344.0918, 910.08435)(323.0747, 7842.37)(323.07416, 9937.047)(366.08514, 468.21503)(367.0756, 246.06999)(348.07065, 1063.1531)(349.0617, 4692.4443)(350.06314, 634.54333)	1.561
3-<i>O</i>-&beta;-D-glucosyl-esculetin	135921	269948	245818	288052	237397	265835	262465	283021	326878	205136	348062	274338	301658	243887	393882	238408	267592	296291	266377	207764	CPD-14455	CPD-14455 [ C15 H16 O9, tgt=44.06, overall=44.06 ]			(344.0918, 910.08435)(323.0747, 7842.37)(323.07416, 9937.047)(366.08514, 468.21503)(367.0756, 246.06999)(348.07065, 1063.1531)(349.0617, 4692.4443)(350.06314, 634.54333)	1.561
esculin	135921	269948	245818	288052	237397	265835	262465	283021	326878	205136	348062	274338	301658	243887	393882	238408	267592	296291	266377	207764	CPD-14461	CPD-14461 [ C15 H16 O9, tgt=44.06, overall=44.06 ]			(344.0918, 910.08435)(323.0747, 7842.37)(323.07416, 9937.047)(366.08514, 468.21503)(367.0756, 246.06999)(348.07065, 1063.1531)(349.0617, 4692.4443)(350.06314, 634.54333)	1.561
(3<i>R</i>)-&beta;-phenylalanine	22585168	15784429	9673117	10651388	1	11426054	14576557	12772049	10829212	28387660	13782354	30858072	25987884	10716188	58242004	12274145	22041508	13006785	13780680	12730851	CPD-14474	CPD-14474 [ C9 H11 N O2, tgt=79.24, overall=79.24 ]			(151.07597, 79126.11)(152.07849, 7412.8945)(166.08728, 716483.8)(167.0903, 66173.73)(148.0761, 1518.04)(188.06903, 3088.8123)(189.0717, 851.4)	2.71
2&alpha;-hydroxytaxusin	1500555	528404	662989	412962	1165871	1306220	1475162	772910	1	1240217	1139670	1030950	1314353	1356773	1748613	252253	1786205	1316531	1279456	544284	CPD-14478	CPD-14478 [ C28 H40 O9, tgt=49.45, overall=49.45 ]			(522.9447, 4918.9253)(523.27905, 3029.5967)(524.28265, 911.8467)(525.2922, 931598.2)(526.29736, 359793.62)(504.15582, 1604.4851)(521.8994, 11429.046)(522.9049, 3884.8547)(524.28296, 1123.6019)(525.2936, 1213753.0)(526.2999, 873702.1)(527.3018, 150744.06)(504.46027, 1423.556)(509.27435, 141066.0)(539.83124, 53133.05)(540.737, 29299.754)(542.3055, 7352.229)(526.2954, 58829.89)(544.3456, 4197.7964)(…	11.4515
2&alpha;, 7&beta;-dihydroxytaxusin	8016486	4005988	6794435	7376636	2396832	7243114	3945647	7213933	7391428	7905505	3638245	7031477	7553335	6469312	3570657	6793317	1244382	3599383	6463808	2813661	CPD-14479	CPD-14479 [ C28 H40 O10, tgt=64.19, overall=64.19 ]			(536.2581, 8181.846)(519.23987, 7965.4717)(520.2428, 3757.0952)(537.2646, 36512.727)(538.267, 4174.823)(539.2715, 573.67)(522.22327, 1472.2185)(522.4127, 1554.3245)(523.4301, 5106.1245)(524.43317, 34603.73)(525.2876, 8818.278)(555.4972, 19005.854)(556.30133, 4228.4937)(536.9979, 1524.4279)(560.1891, 62602.445)(561.1858, 6863.4346)(563.114, 5568.153)(545.0916, 5160.7783)(545.25195, 5757.3804)(546.…	8.3537
glycyrrhetinate	6029762	1	3991215	5007252	3947141	6422251	8994772	2793696	5835069	6295294	11382505	5209826	3252721	6839741	7325852	3353353	10123961	9442756	9969069	1	CPD-14483	CPD-14483 [ C30 H45 O4, tgt=72.53, overall=72.53 ]			(469.32965, 7690.4966)(456.0062, 2123.3267)(457.342, 2666.76)(470.3323, 1547.8458)(455.47128, 2309.4424)(456.9122, 2475.943)(457.3404, 1461.93)(469.36545, 92785.836)(471.37195, 3313.4307)	23.79
glycyrrhetaldehyde	1500475	933728	1025352	1423572	2217469	1275415	1	776875	1096102	1400958	1	988498	1817758	745931	1491579	1862611	1	1	1	2065749	CPD-14485	CPD-14485 [ C30 H46 O3, tgt=42.15, overall=42.15 ]			(456.36816, 36000.11)(457.37103, 9162.96)(439.3414, 5637.005)(442.3509, 128.65)(456.36954, 29337.752)(457.37244, 7204.9585)(481.482, 514.9993)(482.8036, 1643.8175)(483.3654, 1201.96)(461.3247, 35634.332)(462.32733, 8872.765)(463.32657, 536.15576)	19.324
11-deoxoglycyrrhetinate	1	1	1	1	1	1	1	1	1	1	657105	1	1	1	1	1	1	824170	1148608	1	CPD-14486	CPD-14486 [ C30H48O3, tgt= ]			(463.37708, 481.69336)(485.35922, 4928.83)(467.3485, 107.21)	22.888
&alpha;-D-glucuronate	1072110	3470701	2030532	1924867	1341111	1085529	1	1904768	2322561	2176959	210993	1203725	1845603	1770153	1473890	2100664	1	1	247082	2116679	CPD-14488	CPD-14488 [ C6 H9 O7, tgt=75.53, overall=75.53 ]			(193.03517, 30365.055)(194.03827, 728.67096)(175.02307, 40205.4)(176.02585, 1085.2087)(177.0224, 1828.56)(198.056, 205.03)(211.06459, 8235.357)(212.06578, 563.2)(198.07486, 3690.0122)(216.1384, 17047.96)(219.02734, 55914.53)(220.03134, 2782.415)(198.01285, 355.55)	2.053
betulinic aldehyde	1	1	1	1	1	1	109396	1	1	1	136898	1	1	1	1	1	1	1	1	1	CPD-14492	CPD-14492 [ C30H48O2, tgt= ]			(424.36218, 8352.5)(425.37006, 2886.545)	17.43
betulinate	5182452	3161778	3480619	4835494	7696399	4271243	1	2575795	3612098	315424	1	3204615	6318318	3075684	5178839	6897111	1	1	1	7403233	CPD-14493	CPD-14493 [ C30 H47 O3, tgt=30.60, overall=30.60 ]			(456.36777, 43926.605)(457.3707, 11435.099)(439.33893, 9442.505)(456.46906, 25774.082)(457.37213, 6952.6255)(439.34296, 5828.907)(440.3602, 3525.04)(481.64157, 703.1407)(483.36667, 3456.5713)(461.32468, 36411.73)(462.32736, 9097.813)(463.32755, 483.79)	19.319
ursolic aldehyde	1	1	1	1	1	1	109396	1	1	1	136898	1	1	1	1	1	1	1	1	1	CPD-14495	CPD-14495 [ C30H48O2, tgt= ]			(424.36218, 8352.5)(425.37006, 2886.545)	17.43
ursolate	1	1	1	1	1	1	1	1	1	1	657105	1	1	1	1	1	1	824170	1148608	1	CPD-14496	CPD-14496 [ C30H48O3, tgt= ]			(463.37708, 481.69336)(485.35922, 4928.83)(467.3485, 107.21)	22.888
oleanolic aldehyde	223771	120851	159927	214430	330668	186272	109396	104382	1	213511	136898	100604	267858	224222	257515	1	1	1	1	286864	CPD-14498	CPD-14498 [ C30 H48 O2, tgt=47.32, overall=47.32 ]			(441.3566, 5159.55)(445.36865, 5439.005)(425.36096, 6560.3066)(425.37006, 2886.545)(469.36157, 36813.062)(447.34802, 20398.336)(448.35107, 1593.414)	19.1598
steviol	1	1	1	1	1	1	6336974	1	1	1	13158594	1	1	1	1	1	9841714	8683984	6387765	1	CPD-14501	CPD-14501 [ C20 H30 O3, tgt= ]			(324.2352, 557.59)(306.24, 13609.109)(336.2541, 8023.9077)(337.25574, 1714.73)(318.24103, 283156.28)(319.24396, 52544.24)	16.985
steviolmonoside	858654	458835	664919	738723	639471	594198	905153	612133	775429	834555	721434	640426	624082	993025	966844	695450	901685	869878	934444	1	CPD-14502	CPD-14502 [ C26 H40 O8, tgt=46.68, overall=46.68 ]			(480.28345, 2418.2993)(481.27878, 8204.563)(488.27225, 15743.11)(489.27554, 1780.1628)	21.063
19-<i>O</i>-&beta;-glucopyranosyl-steviol	858654	458835	664919	738723	639471	594198	905153	612133	775429	834555	721434	640426	624082	993025	966844	695450	901685	869878	934444	1	CPD-14508	CPD-14508 [ C26 H40 O8, tgt=46.68, overall=46.68 ]			(480.28345, 2418.2993)(481.27878, 8204.563)(488.27225, 15743.11)(489.27554, 1780.1628)	21.063
seychellene	1	1	1	1	1	1	269657	1	1	1	1	1	1	1	1	1	264913	1	598743	1	CPD-14510	CPD-14510 [ C15H24, tgt= ]			(227.17622, 23189.447)(228.17937, 1921.4366)	7.853
conhydrine	1	1	1	1	1	1	1	1	1	1	590088	1	1	1	1	1	1	1	1	1	CPD-14511	CPD-14511 [ C8 H18 N O, tgt= ]			(144.1385, 30587.04)(145.1418, 1422.17)	9.828
conhydrinone	1	1	1	1	1	1	271658	1	1	1	428529	1	1	1	1	1	1	298462	1	1	CPD-14512	CPD-14512 [ C8 H16 N O, tgt= ]			(142.12276, 5058.5063)(167.11467, 47505.42)(147.10358, 5656.6235)	17.877
pseudo-conhydrine	1	1	1	1	1	1	1	1	1	1	590088	1	1	1	1	1	1	1	1	1	CPD-14514	CPD-14514 [ C8H18NO, tgt= ]			(144.1385, 30587.04)(145.1418, 1422.17)	9.828
5-hydroxy-&gamma;-coniceine	1	1	1	1	1	1	268283	1	1	1	264215	1	1	1	1	1	215876	323152	1	1	CPD-14516	CPD-14516 [ C8 H15 N O, tgt= ]			(142.123, 10088.817)(167.11514, 41777.11)(151.11217, 1227.21)	18.164
2-phenylethyl &beta;-<i>D</i>-glucopyranoside	1	1	141684	179050	721213	422260	1	164807	136542	203679	669076	247390	130765	157186	1	83604	633534	406691	473794	1	CPD-14528	CPD-14528 [ C14H20O6, tgt= ]			(285.1234, 544.14)(267.12036, 14344.69)(268.1233, 715.97)(267.12128, 12273.413)(268.12436, 2249.86)(307.17734, 7962.889)(307.11615, 2952.999)(293.11505, 5329.465)	6.42039
phenylethyl acetate	1267548	498548	725770	620268	3078417	376105	798936	550884	1	645117	475544	883843	979636	490529	2757630	775834	896673	310686	649170	1706148	CPD-14529	CPD-14529 [ C10 H12 O2, tgt=47.61, overall=47.61 ]			(166.08615, 69930.26)(167.09021, 12451.015)(147.07637, 24452.844)(168.10165, 5285.606)(147.07697, 21156.479)(164.10751, 20050.502)(165.1115, 4718.74)(187.74457, 4206.7534)(189.07925, 3153.365)(173.57555, 1061.0878)(174.0769, 666.21)	1.823
adhyperforin	1	1	1	1	1	1	1	1	76539	113522	87844	1	95542	1	143469	1	156647	1	1	1	CPD-14533	CPD-14533 [ C36H54O4, tgt= ]			(552.40814, 3080.2317)(568.44446, 7714.8447)(576.39105, 26806.473)(577.3932, 10323.737)(578.40796, 710956.44)(579.4111, 248672.98)	18.9222
N-formyldemecolcine	147005	119270	90621	128610	1	160118	1	102464	125767	181987	152698	145216	157909	121760	376579	152869	143597	1	98092	1	CPD-14544	CPD-14544 [ C22 H25 N O6, tgt=44.20, overall=44.20 ]			(400.3732, 5311.648)(381.15067, 8392.63)(401.1775, 1789.6167)(383.94388, 1736.1615)(421.2033, 8627.98)(425.7919, 4738.0938)(426.92432, 1709.3774)(406.0183, 29624.053)(407.6659, 16778.33)(408.1642, 10218.17)	5.259
UDP-&alpha;-D-galactose	115171	1	1	141356	260754	94735	1	1	1	112888	1	1	237347	86622	124858	278122	1	1	1	208645	CPD-14553	CPD-14553 [ C15 H22 N2 O17 P2, tgt=46.16, overall=46.16 ]			(565.05634, 9097.831)(567.0456, 341.54)(550.04663, 12271.502)(551.59625, 1436.7222)(552.0339, 2775.5)(564.073, 1623.49)	20.025
(R)-4-hydroxymandelonitrile	7755765	7674356	6715458	7809612	6426813	6694627	4216907	7641918	7469849	6939965	3784496	5420874	6218888	6868541	8825680	6489307	4068421	3570540	3365555	9084532	CPD-14590	CPD-14590 [ C8 H7 N O2, tgt=84.20, overall=84.20 ]			(150.68878, 2092.292)(131.03436, 449.03497)(150.05576, 200445.34)(151.05917, 17924.9)(136.055, 465.93)(137.0619, 3471.57)(168.08813, 1374.3431)(150.87608, 16505.605)(152.07799, 2083.529)(154.08585, 365.96497)	2.457
(R)-3,4-dihydroxymandelonitrile	492671	179457	956040	760526	383507	394927	256364	511679	361142	694220	203640	432271	80873	348710	1640375	1	224790	142608	3349428	122167	CPD-14592	CPD-14592 [ C8 H7 N O3, tgt=44.34, overall=44.34 ]			(167.75139, 1275.2709)(168.5506, 2535.2349)(169.0511, 423.53)(147.19627, 11228.903)(166.90843, 2035.5588)(149.16898, 1244.2738)(153.05435, 2698.915)(185.70769, 6513.8374)(188.09258, 10560.3955)(167.35893, 6838.7524)(189.0396, 7896.7417)(191.29036, 1678.8301)(171.02725, 36246.93)(172.45888, 2954.4512)	2.642
3,4-dihydroxymandelonitrile &beta;-<i>D</i>-glucoside	150072	280553	297315	340269	228126	351641	1	247857	370573	1	181973	1	326248	454228	430808	430077	1	1	106592	1	CPD-14593	CPD-14593 [ C14 H17 N O8, tgt=46.78, overall=46.78 ]			(310.38992, 2032.0361)(310.0895, 3285.2297)(346.14035, 936.31)(328.12592, 4140.045)(352.0868, 4912.2397)(351.106, 267.13)(332.06744, 5579.8066)	5.58
linustatin	785638	10984467	5494227	955728	6415938	513187	4499418	6853856	1020922	1294288	5031651	822980	1025897	4294359	1095876	4079751	4728462	4739238	3901855	5162245	CPD-14594	CPD-14594 [ C16 H27 N O11, tgt=70.15, overall=70.15 ]			(412.0784, 2007.9055)(413.1781, 3758.3367)(413.1813, 4838.04)(429.20288, 3081.8054)(409.18372, 97202.62)(410.18683, 17491.236)(417.1454, 313.58002)	5.03
neolinustatin	2627190	5442198	4227320	3203577	2160113	3385190	5786081	4657341	4792650	2976986	361716	3946797	755644	1798134	1051915	3726106	6860183	279095	4483822	3527271	CPD-14596	CPD-14596 [ C17 H29 N O11, tgt=61.65, overall=61.65 ]			(426.65097, 2650.2642)(405.54828, 3001.8293)(409.6841, 5625.835)(410.1856, 1022.22)(426.52402, 3642.913)(427.1846, 1805.79)(429.2064, 443.27)(406.16492, 94357.13)(407.16708, 17016.025)(408.16443, 1862.635)(424.989, 5784.8354)(425.70413, 769.845)(449.1683, 142.63)(428.1456, 1202.6666)	4.6807
castanospermine	279473	302402	1	195165	1	1	1	1	236742	1	181808	262277	252988	1	329689	1	1	83375	173196	1	CPD-14609	CPD-14609 [ C8 H16 N O4, tgt=47.24, overall=47.24 ]			(193.31607, 6017.229)(176.1064, 8154.05)(193.78497, 4182.114)(194.1175, 8414.44)(195.1222, 1689.58)(174.1127, 1738.51)(208.14189, 8465.159)(190.50673, 1380.8336)(217.1053, 3043.3398)(198.09674, 472.645)	3.3238
[truncated: 2,315 more rows]

## Sheet: MSMS
Metabolite name	Rt(min)	Average Mz	Adduct type	Reference m/z	Formula	INCHIKEY	Total score	MS1 isotopic spectrum	MS/MS spectrum
[truncated: 48 more rows]
