# Supplementary material for: Integration of Gas Exchange With Metabolomics: High-Throughput Phenotyping Methods for Screening Biostimulant-Elicited Beneficial Responses to Short-Term Water Deficit
Source: Front Plant Sci. 2021 Jun 1;12:678925. doi: 10.3389/fpls.2021.678925 (PMC8204046; doi:10.3389/fpls.2021.678925)
Supplement: Supplementary Table 2 — Discriminant metabolites identified by the variables importance in projection (VIP) analysis in leaves following biostimulant application. Compounds were selected as discriminant by possessing a VIP score >1.3. [file Table_2.XLSX]

## Sheet: VIPs
Compound	M1.VIP[3+0+0]	M1.VIP[3]cvSE * 2,44693
L-azaserine	1.57976	0.921104
(indol-3-yl)acetate	1.56266	0.926373
shikimate	1.54696	0.789891
4-nitrobenzaldehyde	1.54558	0.933421
2-tridecanone	1.54404	0.818153
&alpha;-L-rhamnopyranose/&alpha;-L-fucopyranose/<i>aldehydo</i>-L-fucose/2-deoxy-D-galactose	1.54129	0.808442
6-hydroxy-2-cyclohexen-one-carboxylate	1.53613	0.827551
A sesquiterpene	1.53489	1.04051
[(4S)-4-(5,5-dimethylcyclohex-1-en-1-yl)-cyclohex-1-en-1-yl] methanol	1.5221	1.05872
maltoheptaose	1.48982	0.448013
EDTA	1.48732	0.591515
glucomalcommin	1.48716	0.635633
&beta;-L-rhamnopyranose	1.48545	0.796339
<i>S</i>-methyl-5'-thioinosine	1.48358	0.770113
glycine betaine/N,N-dimethyl-&beta;-alanine/norvaline/valine/methylsulfanyl)ethyl]malate	1.48301	1.15035
isovalerate	1.481	0.936611
Fe(II)-nicotianamine	1.4727	0.666868
TRIBOA-&beta;-D-glucoside	1.46548	0.536156
afrormosin-7-O-glucoside	1.46537	0.551955
formononetin-7-<i>O</i>-glucoside-6''-malonate	1.4598	0.47919
7,8-dimethoxy-flavone	1.45673	0.573279
rosmarinate	1.45386	0.57316
3-dimethylsulfoniopropionaldehyde	1.44646	0.99097
cyclogutamate	1.44067	0.305643
D-mannitol/galactitol/L-iditol/D-sorbitol	1.43658	0.737661
allantoate	1.43516	1.30638
hexanoate	1.4329	0.660788
(<i>E</i>)-4-(methylsulfanyl)butanal oxime	1.43247	0.831955
6-aminohexanoate/L-norleucine/L-isoleucine/&beta;-alanine betaine/L-leucine	1.43244	0.62182
2-oxoindole-3-acetate	1.43011	0.210642
difluoromethylornithine	1.42998	0.28668
triethanolamine	1.42971	0.623741
2-isopropylmaleate	1.42925	0.936415
dinitrophenylhydrazine	1.42874	0.407908
heptaketide pyrone	1.42765	0.865898
lotaustralin	1.42283	0.861293
L-tyrosine	1.42253	0.736599
lathyrine	1.42245	0.744137
phosphocholine	1.42169	0.726154
8-anilinonaphthalenesulfonate	1.41802	0.514686
harmalol	1.41651	0.746442
dihydrochelerythrine	1.41617	0.566336
pseudobaptigenin	1.41544	1.04045
D,L- &gamma;-hydroxyphosphinothricin	1.41339	0.164475
indole/phenylacetonitrile	1.41308	0.352878
(3S,3'S)-astaxanthin	1.41235	0.736925
xanthohumol	1.41184	0.241792
(2<i>S</i>)-2-isopropyl-3-oxosuccinate	1.40959	0.519295
dimethylsulfonio-2-hydroxybutanoate	1.4064	0.743465
2-(&alpha;-hydroxyethyl)thiamine diphosphate	1.40511	0.659115
cinnamaldehyde	1.40379	0.348551
caffealdehyde	1.40364	0.791679
hypoglycin A	1.40221	0.24504
indol-3-ylmethylisothiocyanate-glutathione	1.40186	0.650353
cathinone	1.40143	0.322106
6-oxohexanoate/4-methyl-2-oxopentanoate/(<i>S</i>)-3-methyl-2-oxopentanoate/2-oxohexanoate	1.39906	0.216956
L-canavanine	1.39753	0.636717
3-phenylpropionaldoxime	1.39738	0.223588
L-dihydrophenylalanine	1.39626	0.830975
4-coumaraldehyde/3,4-dihydrocoumarin/1-phenylpropane-1,2-dione	1.39447	0.957658
coclaurine	1.39279	0.39754
L-selenocystathionine	1.39268	1.15247
adipate	1.39252	0.73087
thidiazuron	1.39047	0.578748
methylsulfanylpropyl]malate	1.38863	0.739402
3-(1H-indol-3-yl)propanoate	1.38862	0.314469
3,4-dihydroxypyridin/3-hydroxy-4h-pyrid-4-one/N-methylmaleimide	1.38829	1.38651
plumbagin	1.38753	0.315081
5,6-dihydrothymine	1.386	1.20107
2-amino-6-hydroxymethyl-7,7-dimethyl-7,8-dihydropteridin-4-one	1.38324	0.324571
N-amino DAP	1.38074	0.320148
ampicillin	1.38057	0.556136
tryptophan	1.38048	0.323752
1-&alpha;-linolenoyl-2-(3E)-hexadecenoyl-phosphatidylglycerol	1.37997	0.555103
3-oxalomalate	1.37845	0.471443
1-hydroxy-3-indolylmethyl glucosinolate/hydroxyglucobrassicin	1.37611	1.15991
1-O-galloyl-&beta;-D-glucose/6-<i>O</i>-galloylglucose	1.37575	0.59287
4-<i>O</i>-oxalyl-L-threonate	1.37338	0.219662
4-deoxypyridoxine 5'-phosphate	1.37253	0.432545
isopropylmalate	1.37012	0.451808
L-saccharopine	1.36867	0.980502
L-isowillardiine	1.36758	0.307144
cinnamyl alcohol/chavicol/<i>trans</i>-anol	1.36607	0.783974
chrysophanol anthrone	1.36259	0.894899
2-<i>O</i>-acetyl-3-<i>O</i>-<i>trans</i>-coutarate	1.36224	0.631087
6-methoxy-3-methyl-2-<i>all-trans</i>-nonaprenyl-1,4-benzoquinol	1.36182	0.631162
octoketide	1.36114	1.42402
(<i>S</i>)-ureidoglycine	1.36107	1.10863
5-amino-1-(5-phospho-D-ribosyl)imidazole-4-carboxamide	1.36073	0.580306
<i>N</i>-acetylglutamyl-phosphate	1.35927	0.798377
(<i>Z</i>)-1-(L-cysteinyglycin-<i>S</i>-yl)-<i>N</i>-hydroxy-2-phenylethan-1-imine	1.35721	0.388708
phenylalanine	1.35698	0.971002
1-<i>aci</i>-nitro-2-phenylethane/5-deoxypyridoxal/(<i>Z</i>)-[(4-hydroxyphenyl)acetaldehyde oxime]/<i>cis</i>-indole-2,3-dihydrodiol/(E)-(4-hydroxyphenyl)acetaldehyde oxime	1.35655	0.686691
7,8-dihydroneopterin	1.35449	0.982785
isoarctigenin/arctigenin	1.35433	0.885947
dicoumarol	1.3538	0.468037
(3<i>R</i>,5<i>S</i>)-3-hydroxy-1-pyrroline-5-carboxylate	1.35229	0.399127
(-)-maackiain-3-<i>O</i>-glucoside-6''-malonate/biochanin A-7-<i>O</i>-glucoside-6''-malonate	1.35137	0.961631
juglone	1.34897	0.629813
3-(indol-3-yl)acrylate	1.34854	0.757441
5-amino-6-(5-phospho-D-ribitylamino)uracil	1.34733	0.6166
serinol	1.34315	0.443639
2-succinylbenzoate	1.34287	0.878594
(R)-3-(3,4-dihydroxyphenyl)lactate/(S)-3,4-dihydroxyphenyllactate	1.34237	1.02237
adenosine 2',3'-cyclic monophosphate	1.34165	0.406842
steviolmonoside/19-<i>O</i>-&beta;-glucopyranosyl-steviol	1.34067	1.12401
lawsone	1.34036	0.529453
sinefungin	1.33944	1.03359
dithiothreitol	1.33921	0.467442
D,L-&alpha;-methylphosphinothricin	1.33709	0.562341
cyanidin 3-<i>O</i>-(6\-<i>O</i>-malonyl)-&beta;-glucoside"	1.33688	1.05332
3-carboxy-4-methoxy-N-methyl-2-pyridone	1.33629	0.711907
A phenylpropanoid	1.33451	0.498845
maysin	1.33436	0.471931
6-formylpterin	1.33334	0.460816
4-methoxy-3-indolylmethylamine	1.33294	0.637347
mizoribine 5'-monophosphate	1.33127	0.624518
methyl (indol-3-yl)acetate	1.32925	0.34308
9-(methylsulfanyl)-2-oxononanoate	1.32816	0.296322
bergapten	1.32715	0.639318
L-2-aminoadipate/<i>N</i>-methyl-L-glutamate	1.32558	0.2722
3,5-bisdiphosphoinositol-1D-<i>myo</i>-inositol 2,3,4,6-tetrakisphosphate	1.32546	0.421348
1-18:1-2-16:1-monogalactosyldiacylglycerol	1.32211	0.784577
(2,6-anhydro-3-deoxy-D-arabino-heptulopyranosid)onate 7-phosphate	1.32088	0.676113
2-<i>S</i>-cysteinyldopa	1.32018	0.215022
&gamma;-L-glutamyl-(<i>S</i>)-2-carboxypropyl-L-cysteine	1.31915	0.828302
5-mercuriocytidine	1.31887	0.462389
(6R)-4a-hydroxy-tetrahydrobiopterin	1.31764	0.658895
gibberellin A<sub>19</sub>/gibberellin A<sub>36</sub>/lariciresinol/(3R,4R)-3,4-bis(4-hydroxy-3-methoxybenzyl)tetrahydro-2-furanol	1.31497	0.691792
8-methoxypsoralen	1.31481	0.543493
prephenate	1.31362	0.562954
ubiquinone-<i>9</i>	1.31343	0.918232
feruloylserotonin	1.30936	0.79222
O-sinapoylglucarolactone	1.30917	0.952689
urate/<i>trans</i>-5-O-caffeoyl-D-quinate	1.30865	1.09725
<i>trans</i>-5-O-caffeoyl-D-quinate	1.30669	0.761312
5-methyltetrahydropteroyl mono-L-glutamate/10-methyl-5,6,7,8-tetrahydropteroylglutamate	1.3066	0.578079
(3Z)-hex-3-en-1-ol/4-methylpentanal/hexan-3-one/1-hexanal/(E)-2-hexenol	1.30659	0.54553
1-(&beta;-D ribofuranosyl)nicotinamide	1.30536	0.246874
EGTA	1.30515	0.857739
<i>N</i>-(4-aminobenzoyl)-L-glutamate	1.30487	0.300077
berbamunine/guattegaumerine	1.3045	0.505184
3-demethylubiquinol-10	1.30371	0.648852
<i>S</i>-formylglutathione	1.30271	0.169359
glycyrrhetinate	1.30218	0.334529
ricinine	1.3021	0.382514
1-<i>O</i>-vanilloyl-&beta;-D-glucose	1.30105	0.790479

## Sheet: VIPs plantcyc
n	Primary ID	M1.VIP[3+0+0]	M1.VIP[3]cvSE * 2,44693
1	L-azaserine	1.57976	0.921104
2	(indol-3-yl)acetate	1.56266	0.926373
3	shikimate	1.54696	0.789891
4	4-nitrobenzaldehyde	1.54558	0.933421
5	3-nitrobenzaldehyde	1.54558	0.933421
6	2-nitrobenzaldehyde	1.54558	0.933421
7	2-tridecanone	1.54404	0.818153
8	&alpha;-L-rhamnopyranose	1.54129	0.808442
9	&alpha;-L-fucopyranose	1.54129	0.808442
10	<i>aldehydo</i>-L-fucose	1.54129	0.808442
11	2-deoxy-D-galactose	1.54129	0.808442
12	6-hydroxy-2-cyclohexen-one-carboxylate	1.53613	0.827551
13	3-deoxycapsidiol	1.53489	1.04051
14	1-deoxycapsidiol	1.53489	1.04051
15	(11<i>R</i>)-dihydroartemisinic aldehyde	1.53489	1.04051
16	artemisinic alcohol	1.53489	1.04051
17	(2<i>E</i>,6<i>E</i>)-farnesal	1.53489	1.04051
18	germacra-1(10),4,11(13)-trien-12-ol	1.53489	1.04051
19	8-hydroxy-(+)-&delta;-cadinene	1.53489	1.04051
20	solavetivol	1.53489	1.04051
21	10-hydroxy-&alpha;-humulene	1.53489	1.04051
22	[(4S)-4-(5,5-dimethylcyclohex-1-en-1-yl)-cyclohex-1-en-1-yl] methanol	1.5221	1.05872
23	maltoheptaose	1.48982	0.448013
24	EDTA	1.48732	0.591515
25	glucomalcommin	1.48716	0.635633
26	&beta;-L-rhamnopyranose	1.48545	0.796339
27	<i>S</i>-methyl-5'-thioinosine	1.48358	0.770113
28	N,N-dimethyl-&beta;-alanine	1.48301	1.15035
29	L-norvaline	1.48301	1.15035
30	glycine betaine	1.48301	1.15035
31	D-valine	1.48301	1.15035
32	L-valine	1.48301	1.15035
33	3-[(2'-methylsulfanyl)ethyl]malate	1.48231	0.275713
34	2-[(2'-methylsulfanyl)ethyl]malate	1.48231	0.275713
35	isovalerate	1.481	0.936611
36	Fe(II)-nicotianamine	1.4727	0.666868
37	TRIBOA-&beta;-D-glucoside	1.46548	0.536156
38	afrormosin-7-O-glucoside	1.46537	0.551955
39	formononetin-7-<i>O</i>-glucoside-6''-malonate	1.4598	0.47919
40	7,8-dimethoxy-flavone	1.45673	0.573279
41	rosmarinate	1.45386	0.57316
42	3-dimethylsulfoniopropionaldehyde	1.44646	0.99097
43	cyclogutamate	1.44067	0.305643
44	D-mannitol	1.43658	0.737661
45	L-iditol	1.43658	0.737661
46	galactitol	1.43658	0.737661
47	D-sorbitol	1.43658	0.737661
48	allantoate	1.43516	1.30638
49	hexanoate	1.4329	0.660788
50	(<i>E</i>)-4-(methylsulfanyl)butanal oxime	1.43247	0.831955
51	6-aminohexanoate	1.43244	0.62182
52	L-norleucine	1.43244	0.62182
53	L-isoleucine	1.43244	0.62182
54	&beta;-alanine betaine	1.43244	0.62182
55	L-leucine	1.43244	0.62182
56	2-oxoindole-3-acetate	1.43011	0.210642
57	difluoromethylornithine	1.42998	0.28668
58	triethanolamine	1.42971	0.623741
59	2-isopropylmaleate	1.42925	0.936415
60	dinitrophenylhydrazine	1.42874	0.407908
61	heptaketide pyrone	1.42765	0.865898
62	lotaustralin	1.42283	0.861293
63	L-tyrosine	1.42253	0.736599
64	lathyrine	1.42245	0.744137
65	phosphocholine	1.42169	0.726154
66	8-anilinonaphthalenesulfonate	1.41802	0.514686
67	harmalol	1.41651	0.746442
68	dihydrochelerythrine	1.41617	0.566336
69	pseudobaptigenin	1.41544	1.04045
70	D,L- &gamma;-hydroxyphosphinothricin	1.41339	0.164475
71	indole	1.41308	0.352878
72	phenylacetonitrile	1.41308	0.352878
73	(3S,3'S)-astaxanthin	1.41235	0.736925
74	xanthohumol	1.41184	0.241792
75	(2<i>S</i>)-2-isopropyl-3-oxosuccinate	1.40959	0.519295
76	dimethylsulfonio-2-hydroxybutanoate	1.4064	0.743465
77	2-(&alpha;-hydroxyethyl)thiamine diphosphate	1.40511	0.659115
78	cinnamaldehyde	1.40379	0.348551
79	caffealdehyde	1.40364	0.791679
80	hypoglycin A	1.40221	0.24504
81	indol-3-ylmethylisothiocyanate-glutathione	1.40186	0.650353
82	cathinone	1.40143	0.322106
83	6-oxohexanoate	1.39906	0.216956
84	4-methyl-2-oxopentanoate	1.39906	0.216956
85	(<i>S</i>)-3-methyl-2-oxopentanoate	1.39906	0.216956
86	2-oxohexanoate	1.39906	0.216956
87	L-canavanine	1.39753	0.636717
88	3-phenylpropionaldoxime	1.39738	0.223588
89	L-dihydrophenylalanine	1.39626	0.830975
90	4-coumaraldehyde	1.39447	0.957658
91	3,4-dihydrocoumarin	1.39447	0.957658
92	1-phenylpropane-1,2-dione	1.39447	0.957658
93	(S)-coclaurine	1.39279	0.39754
94	(<i>R</i>)-coclaurine	1.39279	0.39754
95	L-selenocystathionine	1.39268	1.15247
96	adipate	1.39252	0.73087
97	thidiazuron	1.39047	0.578748
98	3-[(3'-methylsulfanyl)propyl]malate	1.38863	0.739402
99	2-[(3'-methylsulfanyl)propyl]malate	1.38863	0.739402
100	3-(1H-indol-3-yl)propanoate	1.38862	0.314469
101	3,4-dihydroxypyridin	1.38829	1.38651
102	3-hydroxy-4h-pyrid-4-one	1.38829	1.38651
103	N-methylmaleimide	1.38829	1.38651
104	plumbagin	1.38753	0.315081
105	5,6-dihydrothymine	1.386	1.20107
106	2-amino-6-hydroxymethyl-7,7-dimethyl-7,8-dihydropteridin-4-one	1.38324	0.324571
107	N-amino DAP	1.38074	0.320148
108	ampicillin	1.38057	0.556136
109	D-tryptophan	1.38048	0.323752
110	L-tryptophan	1.38048	0.323752
111	1-&alpha;-linolenoyl-2-(3E)-hexadecenoyl-phosphatidylglycerol	1.37997	0.555103
112	3-oxalomalate	1.37845	0.471443
113	1-hydroxy-3-indolylmethyl glucosinolate	1.37611	1.15991
114	4-hydroxyglucobrassicin	1.37611	1.15991
115	1-hydroxyglucobrassicin	1.37611	1.15991
116	1-O-galloyl-&beta;-D-glucose	1.37575	0.59287
117	6-<i>O</i>-galloylglucose	1.37575	0.59287
118	4-<i>O</i>-oxalyl-L-threonate	1.37338	0.219662
119	4-deoxypyridoxine 5'-phosphate	1.37253	0.432545
120	(2<i>R</i>,3<i>S</i>)-3-isopropylmalate	1.37012	0.451808
121	(2<i>S</i>)-2-isopropylmalate	1.37012	0.451808
122	L-saccharopine	1.36867	0.980502
123	L-isowillardiine	1.36758	0.307144
124	cinnamyl alcohol	1.36607	0.783974
125	chavicol	1.36607	0.783974
126	<i>trans</i>-anol	1.36607	0.783974
127	chrysophanol anthrone	1.36259	0.894899
128	2-<i>O</i>-acetyl-3-<i>O</i>-<i>trans</i>-coutarate	1.36224	0.631087
129	6-methoxy-3-methyl-2-<i>all-trans</i>-nonaprenyl-1,4-benzoquinol	1.36182	0.631162
130	octoketide 4b	1.36114	1.42402
131	octoketide	1.36114	1.42402
132	(<i>S</i>)-ureidoglycine	1.36107	1.10863
133	5-amino-1-(5-phospho-D-ribosyl)imidazole-4-carboxamide	1.36073	0.580306
134	<i>N</i>-acetylglutamyl-phosphate	1.35927	0.798377
135	(<i>Z</i>)-1-(L-cysteinyglycin-<i>S</i>-yl)-<i>N</i>-hydroxy-2-phenylethan-1-imine	1.35721	0.388708
136	(3<i>R</i>)-&beta;-phenylalanine	1.35698	0.971002
137	L-phenylalanine	1.35698	0.971002
138	1-<i>aci</i>-nitro-2-phenylethane	1.35655	0.686691
139	5-deoxypyridoxal	1.35655	0.686691
140	(<i>Z</i>)-[(4-hydroxyphenyl)acetaldehyde oxime]	1.35655	0.686691
141	<i>cis</i>-indole-2,3-dihydrodiol	1.35655	0.686691
142	(E)-(4-hydroxyphenyl)acetaldehyde oxime	1.35655	0.686691
143	7,8-dihydroneopterin	1.35449	0.982785
144	isoarctigenin	1.35433	0.885947
145	arctigenin	1.35433	0.885947
146	dicoumarol	1.3538	0.468037
147	(3<i>R</i>,5<i>S</i>)-3-hydroxy-1-pyrroline-5-carboxylate	1.35229	0.399127
148	(-)-maackiain-3-<i>O</i>-glucoside-6''-malonate	1.35137	0.961631
149	biochanin A-7-<i>O</i>-glucoside-6''-malonate	1.35137	0.961631
150	juglone	1.34897	0.629813
151	3-(indol-3-yl)acrylate	1.34854	0.757441
152	5-amino-6-(5-phospho-D-ribitylamino)uracil	1.34733	0.6166
153	serinol	1.34315	0.443639
154	2-succinylbenzoate	1.34287	0.878594
155	(R)-3-(3,4-dihydroxyphenyl)lactate	1.34237	1.02237
156	(S)-3,4-dihydroxyphenyllactate	1.34237	1.02237
157	adenosine 2',3'-cyclic monophosphate	1.34165	0.406842
158	steviolmonoside	1.34067	1.12401
159	19-<i>O</i>-&beta;-glucopyranosyl-steviol	1.34067	1.12401
160	lawsone	1.34036	0.529453
161	sinefungin	1.33944	1.03359
162	L-dithiothreitol	1.33921	0.467442
163	dithioerythritol	1.33921	0.467442
164	D,L-&alpha;-methylphosphinothricin	1.33709	0.562341
165	cyanidin 3-<i>O</i>-(6\-<i>O</i>-malonyl)-&beta;-glucoside"	1.33688	1.05332
166	3-carboxy-4-methoxy-N-methyl-2-pyridone	1.33629	0.711907
167	(+)-pisatin	1.33451	0.498845
168	robustaquinone B	1.33451	0.498845
169	1,7-dihydroxy-6,8-dimethoxy-2-methylanthraquinone	1.33451	0.498845
170	2',7-dihydroxy-4',5'-dimethoxyisoflavone	1.33451	0.498845
171	cirsimaritin	1.33451	0.498845
172	ladanein	1.33451	0.498845
173	7,4'-dimethylkaempferol	1.33451	0.498845
174	3,4'-dimethylkaempferol	1.33451	0.498845
175	6,7,4'-trihydroxyisoflavone	1.33445	0.234285
176	1,6,7-trihydroxy-2-methylanthraquinone	1.33445	0.234285
177	7,8,4'-trihydroxyflavone	1.33445	0.234285
178	2'-hydroxydaidzein	1.33445	0.234285
179	sulfuretin	1.33445	0.234285
180	baicalein	1.33445	0.234285
181	6-hydroxy-2-(6-oxo-1-oxaspiro[2.5]octa-4,7-dien-2-yl)-1-benzofuran-3-one	1.33445	0.234285
182	6-hydroxy-2-(4-hydroxy-phenoxymethylene)-benzofuran-3-one	1.33445	0.234285
183	maysin	1.33436	0.471931
184	6-formylpterin	1.33334	0.460816
185	4-methoxy-3-indolylmethylamine	1.33294	0.637347
186	mizoribine 5'-monophosphate	1.33127	0.624518
187	methyl (indol-3-yl)acetate	1.32925	0.34308
188	9-(methylsulfanyl)-2-oxononanoate	1.32816	0.296322
189	bergapten	1.32715	0.639318
190	L-2-aminoadipate	1.32558	0.2722
191	<i>N</i>-methyl-L-glutamate	1.32558	0.2722
192	3,5-bisdiphosphoinositol-1D-<i>myo</i>-inositol 2,3,4,6-tetrakisphosphate	1.32546	0.421348
193	1-18:1-2-16:1-monogalactosyldiacylglycerol	1.32211	0.784577
194	&alpha;-(2,6-anhydro-3-deoxy-D-arabino-heptulopyranosid)onate 7-phosphate	1.32088	0.676113
195	&beta;-(2,6-anhydro-3-deoxy-D-arabino-heptulopyranosid)onate 7-phosphate	1.32088	0.676113
196	2-<i>S</i>-cysteinyldopa	1.32018	0.215022
197	&gamma;-L-glutamyl-(<i>S</i>)-2-carboxypropyl-L-cysteine	1.31915	0.828302
198	5-mercuriocytidine	1.31887	0.462389
199	(6R)-4a-hydroxy-tetrahydrobiopterin	1.31764	0.658895
200	gibberellin A<sub>19</sub>	1.31497	0.691792
201	gibberellin A<sub>36</sub>	1.31497	0.691792
202	(+)-lariciresinol	1.31497	0.691792
203	(-)-lariciresinol	1.31497	0.691792
204	(3R,4R)-3,4-bis(4-hydroxy-3-methoxybenzyl)tetrahydro-2-furanol	1.31497	0.691792
205	8-methoxypsoralen	1.31481	0.543493
206	prephenate	1.31362	0.562954
207	ubiquinone-<i>9</i>	1.31343	0.918232
208	feruloylserotonin	1.30936	0.79222
209	O-sinapoylglucarolactone	1.30917	0.952689
210	9H-purine-2,6,8-triol	1.30865	1.09725
211	urate	1.30865	1.09725
212	<i>trans</i>-5-O-caffeoyl-D-quinate	1.30669	0.761312
213	5-methyltetrahydropteroyl mono-L-glutamate	1.3066	0.578079
214	10-methyl-5,6,7,8-tetrahydropteroylglutamate	1.3066	0.578079
215	(3Z)-hex-3-en-1-ol	1.30659	0.54553
216	4-methylpentanal	1.30659	0.54553
217	hexan-3-one	1.30659	0.54553
218	1-hexanal	1.30659	0.54553
219	(E)-2-hexenol	1.30659	0.54553
220	1-(&beta;-D ribofuranosyl)nicotinamide	1.30536	0.246874
221	EGTA	1.30515	0.857739
222	<i>N</i>-(4-aminobenzoyl)-L-glutamate	1.30487	0.300077
223	berbamunine	1.3045	0.505184
224	guattegaumerine	1.3045	0.505184
225	3-demethylubiquinol-10	1.30371	0.648852
226	<i>S</i>-formylglutathione	1.30271	0.169359
227	glycyrrhetinate	1.30218	0.334529
228	ricinine	1.3021	0.382514
229	1-<i>O</i>-vanilloyl-&beta;-D-glucose	1.30105	0.790479
230	protochlorophyll a	1.29946	0.248542
231	O-aminobenzaldehyde	1.29792	0.809263
232	(S)-autumnaline	1.29771	0.29701
233	clorgyline	1.29745	0.493155
234	pelargonidin 3-<i>O</i>-&beta;-<i>D</i>-(p-coumaroyl)-sambubioside	1.29597	0.240158
235	(+)-dihydrokaempferol	1.2951	0.196922
236	2,6,7,4'-tetrahydroxyisoflavanone	1.2951	0.196922
237	2,4',5,7-tetrahydroxyisoflavanone	1.2951	0.196922
