# Supplementary material for: Integration of Gas Exchange With Metabolomics: High-Throughput Phenotyping Methods for Screening Biostimulant-Elicited Beneficial Responses to Short-Term Water Deficit
Source: Front Plant Sci. 2021 Jun 1;12:678925. doi: 10.3389/fpls.2021.678925 (PMC8204046; doi:10.3389/fpls.2021.678925)
Supplement: Supplementary Table 3 — Differential metabolites as derived from Volcano analysis [value of p < 0.01; field capacity (FC) > 2] and uploaded to the PlantCyc pathway Tool software for the subsequent analysis. [file Table_3.XLSX]

## Sheet: Volcano P<0.01;FC>2
Compound	C	B	D	Ontology - parents of class	Pathways of compound	SMILES	InChI-Key
(3Z)-hex-3-en-1-ol	-20.49	-20.26	-8.77	an alcohol	detoxification of reactive carbonyls in chloroplasts // "phosphate acquisition" // "traumatin and (<i>Z</i>)-3-hexen-1-yl acetate biosynthesis" // "superpathway of lipoxygenase"	CCC=CCCO	InChIKey=UFLHIIWVXFIJGU-ARJAWSKDSA-N
L-serine	12.69	13.06	11.79	an uncharged polar amino acid // "a proteinogenic amino acid" // "serine" // "a neutral amino acid" // "an L-amino acid"	L-serine biosynthesis I // "L-asparagine degradation II" // "dimethylsulfoniopropanoate biosynthesis III (algae)" // "<i>S</i>-methyl-5-thio-&alpha;-D-ribose 1-phosphate degradation I" // "dimethylsulfoniopropanoate biosynthesis I (Wollastonia)" // "Organic Nitrogen Assimilation" // "&gamma;-glutamyl cycle" // "L-homomethionine biosynthesis" // "aliphatic glucosinolate biosynthesis, side chain el…	C(O)[C@H]([N+])C(=O)[O-]	InChIKey=MTCFGRXMJLQNBG-REOHCLBHSA-N
maltoheptaose	16.52	-0.21	-0.41	a linear malto-oligosaccharide	starch biosynthesis // "superpathway of sucrose and starch metabolism I (non-photosynthetic tissue)" // "starch degradation II" // "starch degradation I"	C(O)[C@H]1([C@@H](O)[C@H](O)[C@@H](O)[C@H](O1)O[C@@H]2([C@H](O)[C@@H](O)[C@H](O[C@H](CO)2)O[C@@H]3([C@H](O)[C@@H](O)[C@H](O[C@H](CO)3)O[C@@H]7([C@H](O)[C@@H](O)[C@@H](O[C@@H]6([C@H](O)[C@@H](O)[C@@H](O[C@@H]4([C@H](O)[C@@H](O)[C@H](O[C@H](CO)4)O[C@@H]5([C@H](O)[C@@H](O)C(O)O[C@H](CO)5)))O[C@H](CO)6))O[C@H](CO)7))))	InChIKey=BNABBHGYYMZMOA-QJBBZCPBSA-N
2-oxovalerate	9.05	9.41	8.81	a 2-oxo carboxylate	aliphatic glucosinolate biosynthesis, side chain elongation cycle // "Organic Nitrogen Assimilation" // "dimethylsulfoniopropanoate biosynthesis I (Wollastonia)" // "L-asparagine degradation II" // "L-homomethionine biosynthesis" // "dimethylsulfoniopropanoate biosynthesis III (algae)" // "<i>S</i>-methyl-5-thio-&alpha;-D-ribose 1-phosphate degradation I"	CCCC(=O)C(=O)[O-]	InChIKey=KDVFRMMRZOCFLS-UHFFFAOYSA-M
succinate	-0.53	0.46	-20.09	a C4-dicarboxylate	syringetin biosynthesis // "pinobanksin biosynthesis" // "chrysin biosynthesis" // "leucodelphinidin biosynthesis" // "leucopelargonidin and leucocyanidin biosynthesis" // "flavonoid biosynthesis" // "rutin biosynthesis" // "4-aminobutanoate degradation I" // "4-aminobutanoate degradation IV" // "L-glutamate degradation IV" // "gibberellin biosynthesis I (non C-3, non C-13 hydroxylation)" // "ant…	C(C([O-])=O)CC([O-])=O	InChIKey=KDYFGRWQOYBRFD-UHFFFAOYSA-L
norfuraneol	-18.27	0.1	-18.27	an aldehyde or ketone		CC1(\\OCC(=O)C(\\O)=1)	InChIKey=DLVYTANECMRFGX-UHFFFAOYSA-N
L-2,4-diaminobutanoate	-0.2	6.62	16.05	an L-amino acid	&gamma;-glutamyl cycle	C(C[C@@H](C([O-])=O)[N+])[N+]	InChIKey=OGNSCSPNOLGXSM-VKHMYHEASA-O
tropinone	-0.05	0.25	-18.28	a small molecule	hyoscyamine and scopolamine biosynthesis // "superpathway of hyoscyamine and scopolamine biosynthesis" // "calystegine biosynthesis"	C[N+]1([C@H]2(CC[C@@H]1CC(=O)C2))	InChIKey=QQXLDOJGLXJCSE-KNVOCYPGSA-O
threose	-0.27	0.28	-17.9	an aldotetraose	ceramide degradation	[CH](=O)[C@@H](O)[C@H](O)CO	InChIKey=YTBSYETUWUMLBZ-QWWZWVQMSA-N
purine-ring	0.08	0.41	-18.27	a ring		C1(=NC=NC2(N=CNC1=2))
4-guanidinobutyraldehyde	-0.45	-0.21	16.33	a small molecule		C(CC[CH]=O)NC(N)=[N+]	InChIKey=VCOFTLCIPLEZKE-UHFFFAOYSA-O
nerol	-0.25	-0.19	2.62	a prenol // "a monoterpenol"	phosphate acquisition	CC(C)=CCCC(\\C)=C/CO	InChIKey=GLZPCOQZEFWAFX-YFHOEESVSA-N
hygrine	-0.45	-0.21	17.87	a small molecule	hyoscyamine and scopolamine biosynthesis // "superpathway of hyoscyamine and scopolamine biosynthesis" // "calystegine biosynthesis"	CC(CC1([N+](CCC1)C))=O	InChIKey=ADKXZIOQKHHDNQ-UHFFFAOYSA-O
5-hydroxy-&gamma;-coniceine	-0.41	-0.22	17.56	an alkaloid	&gamma;-coniciene and coniine biosynthesis	CCCC1(N=CC(O)CC1)	InChIKey=BVUWSAIHNBMOAG-UHFFFAOYSA-N
pseudo-conhydrine	-0.45	-0.21	18.64	an alkaloid	&gamma;-coniciene and coniine biosynthesis	CCCC1(CCC(O)C[N+]1)	InChIKey=BQSAUYXITCMAKS-UHFFFAOYSA-O
(<i>S</i>)-4-amino-4,5-dihydro-2-thiophenecarboxylate	3.04	2.98	6.35	a carboxylate		C1(SC(\\C(=O)[O-])=C/[C@@H]([N+])1)	InChIKey=UPSMRUXNZUWKMB-VKHMYHEASA-N
indole-3-carboxaldehyde	20.63	19.22	20.42	an indole-phytoalexin	indole glucosinolate activation (herbivore attack)	[CH](=O)C1(/C2(\\C=CC=CC(/NC=1)=2))	InChIKey=OLNJUISKUQQNIM-UHFFFAOYSA-N
3-(aminomethyl)indole	17.98	18.04	-0.36	an indole derivative	indole glucosinolate activation (intact plant cell) // "gramine biosynthesis"	C([N+])C1(/C2(/C(\\NC=1)=C/C=CC=2))	InChIKey=JXYGLMATGAAIBU-UHFFFAOYSA-O
(+)-camphor	-0.45	-0.21	18.52	camphor	(+)-camphor biosynthesis // "cuticular wax biosynthesis"	CC1(C)([C@H]2(CC[C@]1(C)C(=O)C2))	InChIKey=DSSYKIVIOFKYAU-XCBNKYQSSA-N
6-hydroxy-2-cyclohexen-one-carboxylate	0.04	1.86	-0.34	an aromatic compound	salicortin biosynthesis	C(=O)(C1(O)(C=CCCC(=O)1))[O-]	InChIKey=WEZWWZKUBQCMBL-UHFFFAOYSA-M
isophthalate	-0.43	-0.26	1.64	a dicarboxylate		C(=O)([O-])C1(/C=CC=C(C(=O)[O-])C=1)	InChIKey=QQVIHTHCMHWDBS-UHFFFAOYSA-L
azelate	-0.43	-0.56	-18.98	an &alpha;,&omega;-dicarboxylate	alkane oxidation	C([O-])(=O)CCCCCCCC(=O)[O-]	InChIKey=BDJRBEYXGGNYIS-UHFFFAOYSA-L
geraniol	-0.45	-0.21	21.53	a prenol // "a monoterpenol"	tea aroma glycosidic precursor bioactivation // "phosphate acquisition" // "secologanin and strictosidine biosynthesis" // "geranyl &beta;-primeveroside biosynthesis" // "geranyl acetate biosynthesis" // "geraniol and geranial biosynthesis"	CC(C)=CCCC(/C)=C/CO	InChIKey=GLZPCOQZEFWAFX-JXMROGBWSA-N
6-(methylsulfanyl)-2-oxohexanoate	-0.45	-0.21	16.76	an &omega;-(methylsulfanyl)-2-oxoalkanoate	Organic Nitrogen Assimilation // "dimethylsulfoniopropanoate biosynthesis I (Wollastonia)" // "L-asparagine degradation II" // "L-homomethionine biosynthesis" // "dimethylsulfoniopropanoate biosynthesis III (algae)" // "<i>S</i>-methyl-5-thio-&alpha;-D-ribose 1-phosphate degradation I" // "aliphatic glucosinolate biosynthesis, side chain elongation cycle"	CSCCCCC(=O)C([O-])=O	InChIKey=GRUGZHAOXOPASC-UHFFFAOYSA-M
(indol-3-yl)acetate	10.02	13.38	-7.3	an auxin // "an indole derivative"	indole-3-acetate activation I // "L-tryptophan degradation VI (via tryptamine)" // "indole-3-acetate biosynthesis I" // "indole-3-acetate biosynthesis II" // "indole-3-acetate activation II" // "IAA biosynthesis VII" // "indole glucosinolate activation (herbivore attack)" // "indole-3-acetate inactivation I" // "indole-3-acetate inactivation IX" // "indole-3-acetate inactivation VI" // "indole-3-…	C([O-])(=O)CC1(/C2(\\C=CC=CC(/NC=1)=2))	InChIKey=SEOVTRFCIGRIMH-UHFFFAOYSA-M
L-arginine	19.03	18.71	10.65	a positively-charged polar amino acid // "a proteinogenic amino acid" // "a basic amino acid" // "an L-amino acid"	L-arginine biosynthesis II (acetyl cycle) // "L-arginine biosynthesis I (via L-ornithine)" // "L-asparagine degradation II" // "dimethylsulfoniopropanoate biosynthesis III (algae)" // "<i>S</i>-methyl-5-thio-&alpha;-D-ribose 1-phosphate degradation I" // "dimethylsulfoniopropanoate biosynthesis I (Wollastonia)" // "&gamma;-glutamyl cycle" // "L-homomethionine biosynthesis" // "aliphatic glucosino…	C(NC(N)=[N+])CC[C@H]([N+])C(=O)[O-]	InChIKey=ODKSFYDXXFIFQN-BYPYZUCNSA-O
(+)-neomenthol	-0.45	-0.21	17.46	a monoterpenol	phosphate acquisition // "menthol biosynthesis"	CC([C@H]1(CC[C@H](C[C@@H]1O)C))C	InChIKey=NOOLISFMXDJSKH-UTLUCORTSA-N
phenanthrene-ring	-0.45	-0.21	20.67	a ring		C2(/C=C1(C=CC3(C=CC=CC(C1=CC=2)=3)))
decan-2-ol	-0.45	-0.21	17.35	a secondary alcohol // "a medium-chain alcohol"	phosphate acquisition // "cuticular wax biosynthesis"	CCCCCCCCC(O)C	InChIKey=ACUZDYFTRHEKOS-UHFFFAOYSA-N
alliin	-0.45	-0.21	19.73	an <i>S</i>-alkyl-L-cysteine S-oxide // "an organosulfur compound"	alliin metabolism // "superpathway of Allium flavor precursors"	C=CCS(=O)C[C@H]([N+])C([O-])=O	InChIKey=XUHLIQGRKRUKPH-ITZCMCNPSA-N
fosmidomycin	-0.65	-0.16	1.54	an antibiotic		C(N(O)C=O)CCP([O-])(O)=O	InChIKey=GJXWDTUCERCKIX-UHFFFAOYSA-M
10-hydroxydecanoate	5.29	-11.28	2.08	an &omega;-hydroxy medium-chain fatty acid	&omega;-hydroxylation of caprate and laurate // "ceramide degradation" // "fatty acid &alpha;-oxidation I" // "acyl-[acyl-carrier protein] thioesterase pathway" // "phospholipases" // "phosphatidylcholine acyl editing" // "triacylglycerol degradation" // "alkane oxidation" // "methyl ketone biosynthesis (engineered)"	C(O)CCCCCCCCC([O-])=O	InChIKey=YJCJVMMDTBEITC-UHFFFAOYSA-M
indolylmethylisothiocyanate	16.77	18.22	-0.15	an indole-phytoalexin	indole glucosinolate activation (herbivore attack) // "indole glucosinolate activation (intact plant cell)"	C(C1(/C2(\\C=CC=CC(/NC=1)=2)))N=C=S	InChIKey=IUGVJHWSHLFGAU-UHFFFAOYSA-N
2D-5-<i>O</i>-methyl-2,3,5/4,6-pentahydroxycyclohexanone	0.52	-0.68	-19.16	a small molecule	pinitol biosynthesis II	CO[C@H]1([C@@H](O)C(=O)[C@H](O)[C@H](O)[C@@H](O)1)	InChIKey=VKPFEZAOAAZDPP-QCNSFQOVSA-N
phlorisovalerophenone	-0.45	-0.21	16.9	a 2-acylphloroglucinol	hyperforin and adhyperforin biosynthesis // "lupulone and humulone biosynthesis" // "superpathway of bitter acids biosynthesis"	CC(CC(C1(\\C(\\O)=C/C(\\O)=C/C(/O)=1))=O)C	InChIKey=VSDWHZGJGWMIRN-UHFFFAOYSA-N
2-amino-4,6-dinitrotoluene	-0.42	-0.27	16.84	a C-nitro compound // "an aromatic compound"	2,4,6-trinitrotoluene degradation	CC1(\\C(\\[N+])=C/C(\\[N+](=O)[O-])=C/C(\\[N+]([O-])=O)=1)	InChIKey=IEEJAAUSLQCGJH-UHFFFAOYSA-O
N-prenylagmatine	-0.45	-0.21	23.63	a small molecule		CC(C)=CCNC(NCCCC[N+])=[N+]	InChIKey=VACJHYSOFQSYAC-UHFFFAOYSA-P
noraucuparin	-0.45	-0.21	16.32	an organic aromatic compound	aucuparin biosynthesis	COC2(\\C=C(C1(/C=CC=CC=1))C=C(O)C(/O)=2)	InChIKey=CDSGSEYGSWGVOJ-UHFFFAOYSA-N
5-isobutylthioribose	5.81	-0.05	10.53	a small molecule		CC(CSCC(C(C(C=O)O)O)O)C	InChIKey=YRYSTVYVSOLNOU-UHFFFAOYSA-N
4-coumaroyl-diketide	6.19	6.4	-0.09	a small molecule	phenylphenalenone biosynthesis	C1(C=C(O)C=CC(C=CC(=O)CC([O-])=O)=1)	InChIKey=VKCHGHDJFMXENE-ZZXKWVIFSA-M
4-methylene diaminopimelate	16.93	19.79	14.07	a small molecule		C=C(CC([N+])C(=O)[O-])CC([N+])C(=O)[O-]	InChIKey=XHOSYVGVHNEHGK-UHFFFAOYSA-N
dihydrolipoate	-0.03	0.52	-18.57	a small molecule		C(S)C[C@H](S)CCCCC(=O)[O-]	InChIKey=IZFHEQBZOYJLPK-SSDOTTSWSA-M
<i>cis</i>-tuberonic acid	-0.1	-0.22	16.75	tuberonic acid	jasmonoyl-L-isoleucine inactivation // "hydroxyjasmonate sulfate biosynthesis"	C(O)CC=CC[C@H]1(C(=O)CC[C@@H]1CC([O-])=O)	InChIKey=RZGFUGXQKMEMOO-SZXTZRQCSA-M
4-<i>O</i>-oxalyl-L-threonate	0.42	-0.91	-18.5	a small molecule	L-ascorbate degradation III	C(=O)([O-])C(O)C(O)COC(=O)C(=O)[O-]	InChIKey=ABFIJCKNMGMYAX-UHFFFAOYSA-L
<i>meso</i>-diaminopimelate	-0.45	-0.21	18.95	2,6-diaminopimelate // "an L-amino acid" // "an L-lysine or <i>meso</i>-2,6-diaminoheptanedioate"	&gamma;-glutamyl cycle // "L-lysine biosynthesis VI" // "superpathway of L-lysine, L-threonine and L-methionine biosynthesis II"	C([C@H](CCC[C@H](C([O-])=O)[N+])[N+])([O-])=O	InChIKey=GMKMEZVLHJARHF-SYDPRGILSA-N
myristate	-0.3	-0.15	21.57	a long-chain 2,3,4-saturated fatty acid // "a saturated fatty acid"	ceramide degradation // "acyl-[acyl-carrier protein] thioesterase pathway" // "phospholipases" // "triacylglycerol degradation" // "acyl-CoA hydrolysis" // "fatty acid &alpha;-oxidation I" // "fatty acid &beta;-oxidation II (peroxisome)" // "superpathway of glyoxylate cycle and fatty acid degradation" // "methyl ketone biosynthesis (engineered)" // "alkane oxidation" // "wax esters biosynthesis I…	CCCCCCCCCCCCCC([O-])=O	InChIKey=TUNFSRHWOTWDNC-UHFFFAOYSA-M
pyrimidin-2-one-ribonucleoside	-0.58	0.19	-3.07	a pyrimidine nucleoside		C2(=NC(=O)N([C@H]1(O[C@H](CO)[C@@H](O)[C@@H](O)1))C=C2)	InChIKey=RPQZTTQVRYEKCR-WCTZXXKLSA-N
(<i>R</i>)-5-phosphomevalonate	-0.12	-0.03	-22.4	a small molecule	isoprene biosynthesis II (engineered) // "mevalonate pathway I" // "superpathway of geranylgeranyldiphosphate biosynthesis I (via mevalonate)"	C[C@@](O)(CCOP(=O)([O-])[O-])CC(=O)[O-]	InChIKey=OKZYCXHTTZZYSK-ZCFIWIBFSA-K
2-hydroxyferulate	-5.42	0.15	-0.62	a small molecule	simplecoumarins biosynthesis	C(C=CC1(/C(\\O)=C/C(/O)=C(C=1)/OC))(=O)O
1,3,7-trimethylurate	1.8	1.86	-11.51	a small molecule	caffeine degradation II	CN1(C(=O)NC2(\\N(C)C(=O)N(C)C(=O)C\\1=2))	InChIKey=BYXCFUMGEBZDDI-UHFFFAOYSA-N
1-deoxy-D-xylulose 5-phosphate	-1.21	-0.11	-21.25	a pentose 5-phosphate	methylerythritol phosphate pathway I // "taxadiene biosynthesis (engineered)" // "superpathway of ergosterol biosynthesis II" // "superpathway of geranylgeranyl diphosphate biosynthesis II (via MEP)" // "isoprene biosynthesis I" // "methylerythritol phosphate pathway II"	CC(=O)[C@@H](O)[C@H](O)COP([O-])(=O)[O-]	InChIKey=AJPADPZSRRUGHI-RFZPGFLSSA-L
2-pentadecanone	-0.45	-0.21	17.28	a methyl ketone	2-methylketone biosynthesis // "cuticular wax biosynthesis" // "methyl ketone biosynthesis (engineered)"	CCCCCCCCCCCCCC(=O)C	InChIKey=CJPNOLIZCWDHJK-UHFFFAOYSA-N
L-aspartyl-4-phosphate	-1.14	-0.48	-19.94	a modified amino acid // "an L-amino acid"	L-homoserine biosynthesis // "superpathway of L-threonine biosynthesis" // "superpathway of L-isoleucine biosynthesis I" // "L-lysine biosynthesis VI" // "superpathway of L-lysine, L-threonine and L-methionine biosynthesis II" // "&gamma;-glutamyl cycle"	C([C@H]([N+])C(=O)[O-])C(=O)OP([O-])(=O)[O-]	InChIKey=IXZNKTPIYKDIGG-REOHCLBHSA-L
tetradecan-1-ol			19.72	a long-chain primary alcohol // "a long-chain alcohol"	phosphate acquisition // "alkane oxidation" // "wax esters biosynthesis II" // "wax esters biosynthesis I"	CCCCCCCCCCCCCCO	InChIKey=HLZKNKRTKFSKGZ-UHFFFAOYSA-N
2,4,6-trinitrobenzene	-0.8	0.31	-17.8	a C-nitro compound		C1(\\C(\\[N+](=O)[O-])=C/C(\\[N+]([O-])=O)=C/C(\\[N+]([O-])=O)=1)	InChIKey=UATJOMSPNYCXIX-UHFFFAOYSA-N
4-amino-2-methyl-5-(phosphooxymethyl)pyrimidine	-0.45	-0.21	17.24	a small molecule	4-amino-2-methyl-5-diphosphomethylpyrimidine biosynthesis // "superpathway of thiamine diphosphate biosynthesis III (eukaryotes)" // "hydroxymethylpyrimidine salvage"	CC1(N=CC(\\COP(=O)([O-])[O-])=C(N)/N=1)	InChIKey=PKYFHKIYHBRTPI-UHFFFAOYSA-L
15-hydroxysolavetivone	1.01	0.22	0.93	a sesquiterpenoid	sesquiterpenoid phytoalexins biosynthesis	C=C([C@@H]2(C[C@@]1([C@@H](CC(C=C1CO)=O)C)CC2))C	InChIKey=JPVDGXUSNAEUIC-JMSVASOKSA-N
2-dehydrolubimin	18.27	-0.28	18.19	a sesquiterpenoid	sesquiterpenoid phytoalexins biosynthesis	C=C([C@@H]2(C[C@@]1([C@@H](CC(C[C@H](C=O)1)=O)C)CC2))C	InChIKey=RXSSJEZNYYKUBE-BHPKHCPMSA-N
9-(methylsulfanyl)-2-oxononanoate	-0.36	-10.28	-1.57	an &omega;-(methylsulfanyl)-2-oxoalkanoate	Organic Nitrogen Assimilation // "dimethylsulfoniopropanoate biosynthesis I (Wollastonia)" // "L-asparagine degradation II" // "L-homomethionine biosynthesis" // "dimethylsulfoniopropanoate biosynthesis III (algae)" // "<i>S</i>-methyl-5-thio-&alpha;-D-ribose 1-phosphate degradation I" // "aliphatic glucosinolate biosynthesis, side chain elongation cycle"	CSCCCCCCCC(=O)C([O-])=O	InChIKey=MJGXIOUQXYXGLP-UHFFFAOYSA-M
(6<i>R</i>)-L-<i>erythro</i>-5,6,7,8-tetrahydrobiopterin	-0.45	-0.21	16.59	(6R)-tetrahydrobiopterin	(<i>S</i>)-reticuline biosynthesis I // "betalamic acid biosynthesis" // "superpathway of betalain biosynthesis" // "rosmarinic acid biosynthesis II" // "superpathway of rosmarinic acid biosynthesis" // "serotonin and melatonin biosynthesis"	C[C@H](O)[C@H](O)[C@@H]1(CNC2(\\N=C(N)NC(C(\\N1)=2)=O))	InChIKey=FNKQXYHWGSIFBK-RPDRRWSUSA-N
3-hydroxy-L-kynurenine	-0.25	0.04	-18	a hydroxy-L-amino acid	L-tryptophan degradation to 2-amino-3-carboxymuconate semialdehyde // "NAD <i>de novo</i> biosynthesis II (from tryptophan)"	C([O-])(=O)[C@@H]([N+])CC(=O)C1(\\C=CC=C(O)C(/N)=1)	InChIKey=VCKPUUFAIGNJHC-LURJTMIESA-N
3-propylphosphoenolpyruvate	-0.29	11.33	-0.42	a small molecule		CCCC=C(C([O-])=O)OP([O-])([O-])=O	InChIKey=LBHRVXNJFHUZKK-UHFFFAOYSA-K
intermedeol	-0.19	-17.7	-1.56	a sesquiterpenoid		C=C([C@@H]1(C[C@H]2([C@@](O)(CCC[C@@](CC1)2C)C)))C	InChIKey=DPQYOKVMVCQHMY-QPSCCSFWSA-N
(+)-valencene	18.03		10.73	a sesquiterpenoid	valencene and 7-epi-&alpha;-selinene biosynthesis	C=C([C@@H]1(C[C@@]2([C@@H](CCC=C(CC1)2)C)C))C	InChIKey=QEBNYNLSCGVZOH-NFAWXSAZSA-N
2,4,6-trinitrotoluene	-0.61	0.17	-2.23	a C-nitro compound // "an aromatic compound"	2,4,6-trinitrotoluene degradation	CC1(\\C(\\[N+](=O)[O-])=C/C(\\[N+](=O)[O-])=C/C(\\[N+]([O-])=O)=1)	InChIKey=SPSSULHKWOKEEL-UHFFFAOYSA-N
spermine	-0.45	-0.21	23.54	an aliphatic &alpha;,&omega;-diamine	superpathway of polyamine biosynthesis II // "spermine biosynthesis" // "superpathway of polyamine biosynthesis" // "spermine and spermidine degradation III" // "spermine and spermidine degradation II"	C(CCC[N+]CCC[N+])[N+]CCC[N+]	InChIKey=PFNFFQXMRSDOHW-UHFFFAOYSA-R
<i>N</i><sup>1</sup>-acetylspermine			18.89	|Aliphatic-N-Acetyl-Diamines|		CC(=O)NCCC[N+]CCCC[N+]CCC[N+]	InChIKey=GUNURVWAJRRUAV-UHFFFAOYSA-Q
5-fluoro-5-deoxy-D-ribulose 1-phosphate	-0.45	-0.21	17.61	an organofluorine compound // "a pentose 1-phosphate"		C(OP([O-])(=O)[O-])C(=O)[C@H](O)[C@H](O)CF	InChIKey=RGVDXIXIXWVTIL-NQXXGFSBSA-L
shikimate 3-phosphate	-0.49	0.2	-19.13	a small molecule	chorismate biosynthesis from 3-dehydroquinate // "chorismate biosynthesis I"	C(=O)([O-])C1(/C[C@@H](O)[C@H](O)[C@H](OP(=O)([O-])[O-])C=1)	InChIKey=QYOJSKGCWNAKGW-PBXRRBTRSA-K
hispidin	6.11	9.69	-3.43	a small molecule		C(\\C1(C=C(O)C(\\O)=C/C=1))=C/C2(/OC(=O)C=C([O-])C=2)	InChIKey=SGJNQVTUYXCBKH-HNQUOIGGSA-M
sterone-ring	-0.45	-0.21	16.87	a ring		C3(CCC2(C4(CCC1(CCCC1C(CCC2C3)4))))
&alpha;-D-ribose 5-phosphate	-0.55	0.22	-19.16	D-ribofuranose 5-phosphate	<i>trans</i>-zeatin biosynthesis // "nicotine biosynthesis" // "superpathway of nicotine biosynthesis" // "pyridine nucleotide cycling (plants)" // "pyridoxal 5'-phosphate biosynthesis II" // "PRPP biosynthesis" // "pentose phosphate pathway (non-oxidative branch)" // "pentose phosphate pathway" // "Calvin-Benson-Bassham cycle" // "Rubisco shunt"	C(OP([O-])(=O)[O-])[C@H]1([C@@H](O)[C@@H](O)[C@@H](O)O1)	InChIKey=KTVPXOYAKDPRHY-AIHAYLRMSA-L
(3E,7E)-4,8,12-trimethyltrideca-1,3,7,11-tetraene	-0.45	-0.21	19.76	a homoterpenoid	(<i>E,E</i>)-4,8,12-trimethyltrideca-1,3,7,11-tetraene biosynthesis	C=CC=C(CCC=C(CCC=C(C)C)C)C	InChIKey=CWLVBFJCJXHUCF-RNPYNJAESA-N
1,16-hexadecane-diol	-0.45	-0.21	20.97	a long-chain alcohol // "a diol"	sporopollenin precursors biosynthesis // "phosphate acquisition" // "alkane oxidation" // "wax esters biosynthesis II" // "wax esters biosynthesis I"	C(O)CCCCCCCCCCCCCCCO	InChIKey=GJBXIPOYHVMPQJ-UHFFFAOYSA-N
L-cystine	-0.43	-0.03	-2.48	cystine // "a non-proteinogenic &alpha;-amino acid"		C([C@@H](C(=O)[O-])[N+])SSC[C@@H](C([O-])=O)[N+]	InChIKey=LEVWYRKDKASIDU-IMJSIDKUSA-N
ellipticine	-0.45	-0.21	20.54	a small molecule		CC3(/C4(C(C(/C)=C1(C(\\C2(/C(\\N1)=C/C=CC=2))=3))=CC=NC=4))	InChIKey=CTSPAMFJBXKSOY-UHFFFAOYSA-N
<i>N</i>-(2-methoxy-4-pyridyl)-<i>N'</i>-phenylurea	0.48	0.06	-18.05	a small molecule		COC2(C=C(NC(=O)NC1(/C=CC=CC=1))C=CN=2)	InChIKey=HATOTLUJWFPHHP-UHFFFAOYSA-N
13-hydroxylupanine	2.9	3.36	-13.74	a small molecule	lupanine biosynthesis	C4(C[C@@H](O)CC3(C1(CC(C2(CCCC(N(C1)2)=O))C[N+]34)))	InChIKey=JVYKIBAJVKEZSQ-XHLRWWMNSA-O
pentadecan-1-ol	-0.45	-0.21	21.72	a long-chain primary alcohol // "a long-chain alcohol"	phosphate acquisition // "alkane oxidation" // "wax esters biosynthesis II" // "wax esters biosynthesis I"	CCCCCCCCCCCCCCCO	InChIKey=REIUXOLGHVXAEO-UHFFFAOYSA-N
(6R)-4a-hydroxy-tetrahydrobiopterin	1.62	0.48	0.22	a tetrahydropterin	betalamic acid biosynthesis // "superpathway of betalain biosynthesis" // "rosmarinic acid biosynthesis II" // "superpathway of rosmarinic acid biosynthesis" // "serotonin and melatonin biosynthesis" // "(<i>S</i>)-reticuline biosynthesis I"	C[C@H](O)[C@H](O)[C@@H]1(CNC2(=NC(N)=NC(=O)[C@](O)(N1)2))	InChIKey=KJKIEFUPAPPGBC-XXKOCQOQSA-N
(9Z,12E)-octadecadienoate	-0.45	-0.21	23.23	a long-chain 2,3,4-saturated fatty acid // "a polyunsaturated fatty acid"	ceramide degradation // "acyl-[acyl-carrier protein] thioesterase pathway" // "phospholipases" // "triacylglycerol degradation" // "acyl-CoA hydrolysis" // "fatty acid &alpha;-oxidation I" // "fatty acid &beta;-oxidation II (peroxisome)" // "superpathway of glyoxylate cycle and fatty acid degradation" // "methyl ketone biosynthesis (engineered)" // "alkane oxidation" // "wax esters biosynthesis I…	CCCCCC=CCC=CCCCCCCCC([O-])=O	InChIKey=OYHQOLUKZRVURQ-KQHSAVHASA-M
oleate	-0.45	-0.21	25.38	a long-chain 2,3,4-saturated fatty acid // "a monounsaturated fatty acid" // "an &omega;-9 fatty acid"	ceramide degradation // "acyl-[acyl-carrier protein] thioesterase pathway" // "phospholipases" // "triacylglycerol degradation" // "acyl-CoA hydrolysis" // "fatty acid &alpha;-oxidation I" // "fatty acid &beta;-oxidation II (peroxisome)" // "superpathway of glyoxylate cycle and fatty acid degradation" // "methyl ketone biosynthesis (engineered)" // "alkane oxidation" // "wax esters biosynthesis I…	CCCCCCCCC=CCCCCCCCC([O-])=O	InChIKey=ZQPPMHVWECSIRJ-KTKRTIGZSA-M
a linoleate group	-19.42	-18.98	9.31	Superatoms		CCCCCC=CCC=CCCCCCCCC=O
pentachlorophenol	-0.45	-0.21	16.31	a chloroaromatic compound		C1(C(/Cl)=C(C(/[O-])=C(C(/Cl)=1)/Cl)/Cl)Cl	InChIKey=IZUPBVBPLAPZRR-UHFFFAOYSA-M
&gamma;-L-glutamyl-(<i>S</i>)-methyl-L-cysteine	-0.59	12.91	-3.57	a [&gamma;-glutamyl-L-cysteine]-<i>S</i>-conjugate	glutathione-mediated detoxification II // "methiin metabolism"	CSC[C@@H](C([O-])=O)NC(=O)CC[C@H]([N+])C([O-])=O	InChIKey=UPCDLBPYWXOCOK-WDSKDSINSA-M
methyl (<i>2E,6E</i>)-farnesoate	-0.45	-0.21	20.39	a methyl farnesoate	juvenile hormone III biosynthesis I	CC(C)=CCCC(/C)=C/CCC(/C)=C/C(=O)OC	InChIKey=NWKXNIPBVLQYAB-VDQVFBMKSA-N
(indol-3-yl)acetyl-L-isoleucine			16.89	an indole derivative // "a modified amino acid"		CC[C@@H]([C@H](NC(CC1(/C2(/C(\\NC=1)=C/C=CC=2)))=O)C([O-])=O)C	InChIKey=WPTUQMUCTTVOFW-BONVTDFDSA-M
galanthamine	-0.45	-0.18	16.93	a small molecule	<i>Amaryllidacea</i> alkaloids biosynthesis	CN3(CC[C@]14(C=C[C@H](O)C[C@H](OC2(\\C/1=C(C=CC(/OC)=2)/C3))4))	InChIKey=ASUTZQLVASHGKV-JDFRZJQESA-N
10,16-dihydroxypalmitate	-0.22	0.04	4.59	a small molecule		C(O)CCCCCC(O)CCCCCCCCC(=O)[O-]	InChIKey=VJZBXAQGWLMYMS-UHFFFAOYSA-M
(9Z)-octadec-9-ene-1,18-diol	-0.49	-0.16	5.43	a long-chain alcohol // "a diol"	sporopollenin precursors biosynthesis // "phosphate acquisition" // "alkane oxidation" // "wax esters biosynthesis II" // "wax esters biosynthesis I"	C(O)CCCCCCCC=CCCCCCCCCO	InChIKey=XUSRQFSIUJWCKT-UPHRSURJSA-N
&alpha;-D-glucuronate 1-phosphate	-0.25	0.61	-17.98	a small molecule	UDP-&alpha;-D-glucuronate biosynthesis (from <i>myo</i>-inositol)	C([C@@H]1(O[C@@H]([C@@H]([C@H]([C@@H]1O)O)O)OP([O-])([O-])=O))(=O)[O-]	InChIKey=AIQDYKMWENWVQJ-QIUUJYRFSA-K
heliannuol C	-0.45	-0.21	17.29	a sesquiterpenoid	heliannuol and heliespirone biosynthesis	CC1(/C(\\O)=C/C2([C@@H](C[C@@H](O)[C@](OC(C=1)=2)(C)C)C=C))
16-epivellosimine	10.24	3.28	-3.48	a small molecule	ajmaline and sarpagine biosynthesis	CC=C5(CN1([C@@H]2(C[C@@H]([C@@H](C=O)[C@@H]1CC3(/C4(\\C=CC=CC(/NC\\2=3)=4)))5)))	InChIKey=MHASSCPGKAMILD-JNPAWNQGSA-N
linoleate	-0.59	-0.26	5.1	a long-chain 2,3,4-saturated fatty acid // "a &omega;-6 fatty acid"	ceramide degradation // "acyl-[acyl-carrier protein] thioesterase pathway" // "phospholipases" // "triacylglycerol degradation" // "acyl-CoA hydrolysis" // "fatty acid &alpha;-oxidation I" // "fatty acid &beta;-oxidation II (peroxisome)" // "superpathway of glyoxylate cycle and fatty acid degradation" // "methyl ketone biosynthesis (engineered)" // "alkane oxidation" // "wax esters biosynthesis I…	CCCCCC=CCC=CCCCCCCCC([O-])=O	InChIKey=OYHQOLUKZRVURQ-HZJYTTRNSA-M
apigenin-7,4'-dimethyl ether	-3.68	-7.34	-7.42	a methoxyflavone // "a monohydroxyflavone"	salvigenin biosynthesis	COC3(/C=CC(\\C1(/OC2(\\C=C(OC)C=C(O)C(/C(=O)C=1)=2)))=C/C=3)	InChIKey=LZERJKGWTQYMBB-UHFFFAOYSA-N
3-dehydrosphinganine (C18)	-19.46	-19.02	9.54	a 3-dehydrosphinganine	sphingolipid biosynthesis (plants) // "phosphate acquisition" // "ceramide degradation"	CCCCCCCCCCCCCCCC([C@H](CO)[N+])=O	InChIKey=KBUNOSOGGAARKZ-KRWDZBQOSA-O
(<i>R</i>)-<i>N</i>-methylcoclaurine	-0.73	-0.58	-1.16	a small molecule	bisbenzylisoquinoline alkaloid biosynthesis	C1([N+]([C@@H](C2(/C=C(C(\\OC)=C/C(/C1)=2)O))CC3(/C=CC(\\O)=C/C=3))C)	InChIKey=BOKVLBSSPUTWLV-MRXNPFEDSA-O
sphinganine (C18)	-0.49	-0.16	5.42	a D-<i>erythro</i> sphinganine	phosphate acquisition // "ceramide degradation" // "sphingolipid biosynthesis (plants)"	CCCCCCCCCCCCCCC[C@H]([C@H](CO)[N+])O	InChIKey=OTKJDMGTUTTYMP-ZWKOTPCHSA-O
morphine	0.29	-17.9	1.28	an alkaloid	morphine biosynthesis	C[N+]4(CC[C@]15([C@H]3([C@H](C=C[C@@H]([C@@H](CC2(/C=CC(/O)=C(C\\1=2)/O3))4)5)O)))	InChIKey=BQJCRHHNABKAKU-KBQPJGBKSA-O
stearate	-0.45	-0.21	21.85	an even numbered straight chain 2,3,4-saturated fatty acid // "a long-chain 2,3,4-saturated fatty acid" // "a saturated fatty acid"	ceramide degradation // "acyl-[acyl-carrier protein] thioesterase pathway" // "phospholipases" // "triacylglycerol degradation" // "acyl-CoA hydrolysis" // "fatty acid &alpha;-oxidation I" // "fatty acid &beta;-oxidation II (peroxisome)" // "superpathway of glyoxylate cycle and fatty acid degradation" // "methyl ketone biosynthesis (engineered)" // "alkane oxidation" // "wax esters biosynthesis I…	CCCCCCCCCCCCCCCCCC(=O)[O-]	InChIKey=QIQXTHQIDYTFRH-UHFFFAOYSA-M
2-chloro-2'-deoxyadenosine	0.32	0.43	-3.03	a nucleoside analog		C(O)[C@@H]1(O[C@H](C[C@H](O)1)N2(C=NC3(C(N)=NC(Cl)=NC2=3)))	InChIKey=PTOAARAWEBMLNO-KVQBGUIXSA-N
(+)-dihydrokaempferol	0.26	0.38	-18.68	a (2<i>R</i>,3<i>R</i>)-dihydroflavonol	flavonoid biosynthesis // "syringetin biosynthesis" // "leucodelphinidin biosynthesis" // "leucopelargonidin and leucocyanidin biosynthesis" // "flavonol biosynthesis" // "superpathway of flavones and derivatives biosynthesis" // "flavonoid biosynthesis (in equisetum)"	C3(\\C=C(C=CC(\\[C@@H]1(OC2(/C(/C([C@@H]1O)=O)=C(C=C(O)C=2)/O)))=3)O)	InChIKey=PADQINQHPQKXNL-LSDHHAIUSA-N
<i>ent</i>-kaurenal	-0.45	-0.21	25.73	a small molecule	GA<sub>12</sub> biosynthesis // "superpathway of gibberellin GA<sub>12</sub> biosynthesis" // "superpathway of gibberellin biosynthesis"	C=C1([C@@H]4(C[C@]3(C1)(CC[C@H]2([C@](C)(C=O)CCC[C@](C)2[C@@H]3CC4))))	InChIKey=JCAVDWHQNFTFBW-XRNRSJMDSA-N
1,18-octadecane-diol	-0.45	-0.21	19.58	a long-chain alcohol // "a diol"	sporopollenin precursors biosynthesis // "phosphate acquisition" // "alkane oxidation" // "wax esters biosynthesis II" // "wax esters biosynthesis I"	C(O)CCCCCCCCCCCCCCCCCO	InChIKey=LUUFSCNUZAYHAT-UHFFFAOYSA-N
oxindole-3-acetyl-L-valine	-16.44	-7.25	-16.44	an indole derivative // "a modified amino acid"		CC([C@H](NC(CC1(C2(/C(\\NC1=O)=C/C=CC=2)))=O)C([O-])=O)C	InChIKey=FSEDSDXBTJRCGH-HQVZTVAUSA-M
dehydroabietadienal	-0.45	-0.21	24.57	a diterpenoid // "an aldehyde"	ceramide degradation // "dehydroabietic acid biosynthesis" // "superpathway of diterpene resin acids biosynthesis"	CC(C3(C=C2(C([C@]1(C([C@@](CCC1)(C=O)C)CC2)C)=CC=3)))C	InChIKey=YCLCHPWRGSDZKL-NRRUETGQSA-N
(13<i>E</i>)-labda-7,13-dien-15-ol	-0.45	-0.21	22.17	a diterpenoid		CC(\\CC[C@@H]2(C(\\C)=C/C[C@@H]1([C@@](CCC[C@]1(C)2)(C)C)))=C/CO	InChIKey=KPOGKOXAZMFZNM-ATPOGHATSA-N
5&alpha;-androstane-3,17-dione	-0.43	-0.18	19.52	a 3-oxo-5-&alpha;-steroid		C[C@]12(CCC(C[C@@H]1CC[C@H]4([C@@H]2CC[C@@]3([C@H](CCC(=O)3)4)C))=O)	InChIKey=RAJWOBJTTGJROA-WZNAKSSCSA-N
labd-13-en-8&alpha;-,15 diol	-0.45	-0.21	23.63	a diterpenoid	labdane-type diterpenes biosynthesis	CC(CCO)CCC1([C@](C)(O)CCC2([C@@](C)1CCC[C@](C)(C)2))	InChIKey=MCHQEVJMCLOQAZ-YXAMPDCWSA-N
(1E,6E)-1-(4-hydroxyphenyl)-7-phenylhepta-1,6-diene-3,5-dione	17.98	8.63	17.9	a secondary metabolite	phenylphenalenone biosynthesis	C2(/C=CC(C=CC(CC(=O)C=CC1(C=CC(\\O)=C/C=1))=O)=CC=2)	InChIKey=WMRNQEQFTDTOLL-QHKWOANTSA-N
<i>trans</i>-coutarate	-0.2	0.08	-2.48	an aromatic carboxylate	2-<i>O</i>-acetyl-3-<i>O</i>-<i>trans</i>-coutarate biosynthesis	C([O-])(=O)[C@H](O)[C@@H](C(=O)[O-])OC(=O)C=CC1(C=CC(\\O)=C/C=1)	InChIKey=INYJZRKTYXTZHP-MFFLNWJUSA-L
dihydrosterculate	-0.45	-0.21	22.93	a fatty acid derivative	ceramide degradation // "fatty acid &alpha;-oxidation I" // "acyl-[acyl-carrier protein] thioesterase pathway" // "phospholipases" // "phosphatidylcholine acyl editing" // "triacylglycerol degradation" // "methyl ketone biosynthesis (engineered)" // "alkane oxidation"	CCCCCCCCC1(CC1CCCCCCCC(=O)[O-])	InChIKey=PDXZQLDUVAKMBQ-UHFFFAOYSA-M
vernoleate	-0.45	-0.2	3.28	a carboxylate		CCCCC[C@H]1(O[C@H](CC=CCCCCCCCC(=O)O)1)
7-hydroxy-4'5'-dimethoxyisoflavone	-3.68	-3.22	-7.42	an isoflavone	rot-2'-enonate biosynthesis	COC3(\\C=CC(\\C1(/C(=O)C2(\\C=CC(\\O)=C/C(/OC=1)=2)))=C/C(/OC)=3)	InChIKey=VFZIJLPRJAQGFO-UHFFFAOYSA-N
protoemetine	-0.49	-0.12	20.57	an alkaloid	emetine biosynthesis	CCC1(C[N+]2(CCC3(/C(\\[C@H](CC1C[CH]=O)2)=C/C(/OC)=C(C=3)/OC)))	InChIKey=BBVFHYCHEWCGBH-KVULBXGLSA-O
robustaquinone D	7.68	-0.21	-0.26	a hydroxyanthraquinone	cuticular wax biosynthesis // "robustaquinone biosynthesis"	CC1(\\C=CC2(/C(=O)C3(\\C=C(OC)C(\\O)=C/C(/C(=O)C(\\C(\\O)=1)=2)=3)))	InChIKey=BVNMMZKNCPOEFW-UHFFFAOYSA-N
(5Z,8Z,11Z,14Z,17Z)-icosapentaenoate	-0.79	-17.49	3.6	a long-chain 2,3,4-saturated fatty acid // "a &omega;-3 fatty acid"	ceramide degradation // "acyl-[acyl-carrier protein] thioesterase pathway" // "phospholipases" // "triacylglycerol degradation" // "acyl-CoA hydrolysis" // "fatty acid &alpha;-oxidation I" // "fatty acid &beta;-oxidation II (peroxisome)" // "superpathway of glyoxylate cycle and fatty acid degradation" // "methyl ketone biosynthesis (engineered)" // "alkane oxidation" // "wax esters biosynthesis I…	CCC=CCC=CCC=CCC=CCC=CCCCC(=O)[O-]	InChIKey=JAZBEHYOTPTENJ-JLNKQSITSA-M
11-hydroxyferruginol	-0.45	-0.21	23.5	a diterpenoid	carnosate bioynthesis	CC(C)C2(C=C1(CC[C@@H]3(C(C)(C)CCC[C@](C)(C1=C(O)C(O)=2)3)))	InChIKey=MUVSVZOWXAYLSD-YWZLYKJASA-N
pseudobaptigenin	17.27	-0.21	-0.41	a small molecule	(-)-maackiain biosynthesis // "superpathway of formononetin derivative biosynthesis" // "superpathway of pterocarpan biosynthesis (via formononetin)"	C1(OC4(/C(\\O1)=C/C(\\C2(/C(=O)C3(\\C=CC(\\O)=C/C(/OC=2)=3)))=C/C=4))	InChIKey=KNJNBKINYHZUGC-UHFFFAOYSA-N
p-coumaroyltriacetate	18.26	-0.22	-0.26	a small molecule	resveratrol biosynthesis	C(CC(CC(CC(C=CC1(C=CC(\\O)=C/C=1))=O)=O)=O)([O-])=O	InChIKey=YGTSJOBIWGILCS-ZZXKWVIFSA-M
(4<i>S</i>)-2,3-dehydro-leucocyanidin	0.21	0.41	-2.6	a flavanol		C3(/C(\\C1(\\OC2(/C=C(C=C(C(/[C@@H](C(\\O)=1)O)=2)O)O)))=C/C(/O)=C(C=3)/O)	InChIKey=YAAGNRWEJSZFLV-ZDUSSCGKSA-N
<i>O</i>-sinapoylcholine	-0.45	-0.21	18.29	a small molecule	sinapate ester biosynthesis	C(COC(=O)C=CC1(C=C(OC)C(/O)=C(C=1)/OC))[N+](C)(C)C	InChIKey=HUJXHFRXWWGYQH-UHFFFAOYSA-O
sarpagine	5.36	8.9	9.82	a small molecule	ajmaline and sarpagine biosynthesis	CC=C5(CN1([C@@H]2(C[C@@H]([C@@H](CO)[C@@H]1CC3(/C4(/C(\\NC\\2=3)=C/C=C(O)C=4)))5)))	InChIKey=VTVQHYQGTTVKDE-QDHOPYFXSA-N
5-pentadecatrienyl resorcinol-3-methyl ether	-0.45	-0.21	19.98	a small molecule	sorgoleone biosynthesis	C=CCC=CCC=CCCCCCCCC1(/C=C(O)C=C(OC)C=1)	InChIKey=GKGSHNPKQBMHTD-AFJQJTPPSA-N
phenylmercuric chloride	-0.81	0.22	-17.45	an organometallic compound		C1(/C=CC(\\[Hg]Cl)=C/C=1)	InChIKey=AWGTVRDHKJQFAX-UHFFFAOYSA-M
taxa-4(20),11-dien-5-&alpha;-yl acetate		-0.25	19.75	a small molecule	taxol biosynthesis	CC2(/CC[C@@H]1(C[C@@H]3([C@](C)(CCC(/[C@](C)(C)1)=2)CC[C@H](OC(=O)C)C3=C)))	InChIKey=APIZAZFFQBVSJA-ZJDLJICXSA-N
coronatine	-0.45	-0.21	20.36	a small molecule		CC[C@H]3(C[C@H]1(C(=O)CC[C@@H]1C(\\C(N[C@]2(C[C@H](CC)2)C(C)=C)=O)=C/3))	InChIKey=YKXGLBBFZOVSBK-UWHNRDKOSA-N
(9R,10S)-dihydroxystearate			18.82	an in-chain hydroxy fatty acid // "a long-chain 2,3,4-saturated fatty acid"	acyl-CoA hydrolysis // "ceramide degradation" // "acyl-[acyl-carrier protein] thioesterase pathway" // "phospholipases" // "triacylglycerol degradation" // "methyl ketone biosynthesis (engineered)" // "alkane oxidation" // "fatty acid &alpha;-oxidation I" // "fatty acid &beta;-oxidation II (peroxisome)" // "superpathway of glyoxylate cycle and fatty acid degradation" // "wax esters biosynthesis I…	CCCCCCCC[C@H](O)[C@H](O)CCCCCCCC([O-])=O	InChIKey=VACHUYIREGFMSP-DLBZAZTESA-M
(S)-norreticuline	-0.45	-0.21	18.15	an alkaloid // "norreticuline"	papaverine biosynthesis	COC3(/C(\\O)=C/C(\\C[C@@H]1(C2(/C=C(C(\\OC)=C/C(/CC[N+]1)=2)O)))=C/C=3)	InChIKey=FVEMXQCEJGGXJB-AWEZNQCLSA-O
(indol-3-yl)acetyl-L-tyrosine	-0.45	-0.21	19.84	an indole derivative // "a modified amino acid"		C2(/NC3(\\C=CC=CC(/C(\\CC(N[C@H](C([O-])=O)CC1(/C=CC(\\O)=C/C=1))=O)=2)=3))	InChIKey=HLBLLQMXYYYBLN-KRWDZBQOSA-M
<i>N</i>-heptylpantothenamide	-0.45	-0.21	19.82	a small molecule		CCCCCCCNC(=O)CCNC([C@H](O)C(C)(C)CO)=O	InChIKey=HHAVGBXLGVYXFF-AWEZNQCLSA-N
oryzalexin C	-0.45	-0.21	22.86	an oryzalexin	oryzalexin A, B, and C biosynthesis	C=C[C@]3(CC[C@@H]2([C@]1(CCC(C(C)(C)[C@H]1CC(=O)C/2=C/3)=O)C))C	InChIKey=IOCKHKBAJGJHFL-FCNFAXOHSA-N
(indol-3-yl)acetyl-L-phenylalanine	-3.62	-10.01	-16.39	an indole derivative // "a modified amino acid"	indole-3-acetate inactivation VIII // "superpathway of indole-3-acetate conjugate biosynthesis" // "indole-3-acetate inactivation V"	C(CC1(/C2(\\C=CC=CC(/NC=1)=2)))(N[C@H](C(=O)[O-])CC3(/C=CC=CC=3))=O	InChIKey=BUGQHORRADGONS-KRWDZBQOSA-M
6-decylubiquinone	17.91	-0.13	-0.42	a quinone	cuticular wax biosynthesis	CCCCCCCCCCC1(/C(C(/OC)=C(C(C(\\C)=1)=O)/OC)=O)	InChIKey=VMEGFMNVSYVVOM-UHFFFAOYSA-N
steviol	-0.48	-0.12	22.64	a diterpenoid	steviol biosynthesis // "steviol glucoside biosynthesis (rebaudioside A biosynthesis)"	C=C1(C[C@]24(C[C@@]1(O)CC[C@@H]([C@]3(C)(CCC[C@](C([O-])=O)(C)[C@@H](CC2)3))4))	InChIKey=QFVOYBUQQBFCRH-VQSWZGCSSA-M
5'-n-propylthioadenosine	-0.28	-0.1	1.1	a nucleic acid component		CCCSC[C@H]3([C@H]([C@H]([C@H](N1(C2(N=CN=C(C(N=C1)=2)N)))O3)O)O)	InChIKey=IVGJMPBYPXLAAV-QYVSTXNMSA-N
<i>N</i><sup>2</sup>-formyl-<i>N</i><sup>1</sup>-(5-phospho-&beta;-D-ribosyl)glycinamide	-0.45	-0.21	18.31	a small molecule	5-aminoimidazole ribonucleotide biosynthesis I // "superpathway of purine nucleotides <i>de novo</i> biosynthesis I"	C(NC=O)C(=O)N[C@@H]1([C@H](O)[C@H](O)[C@@H](COP([O-])(=O)[O-])O1)	InChIKey=VDXLUNDMVKSKHO-XVFCMESISA-L
2-<i>R</i>-hydroperoxy-linolenate	-0.45	-0.21	18.7	a 2(R)-hydroperoxy fatty acid // "a long-chain fatty acid"	ceramide degradation // "acyl-[acyl-carrier protein] thioesterase pathway" // "phospholipases" // "triacylglycerol degradation" // "fatty acid &alpha;-oxidation I" // "methyl ketone biosynthesis (engineered)" // "alkane oxidation" // "wax esters biosynthesis II" // "long-chain fatty acid activation" // "alkane biosynthesis II" // "phosphatidylcholine acyl editing" // "terminal olefins biosynthesi…	CCC=CCC=CCC=CCCCCCCC(OO)C(=O)O
4-methylumbelliferyl glucoside	-0.45	-0.21	20.69	a small molecule	phenolic malonylglucosides biosynthesis	CC2(/C3(\\C=CC(\\O[C@H]1(O[C@H](CO)[C@@H](O)[C@H](O)[C@@H](O)1))=C/C(/OC(=O)C=2)=3))	InChIKey=YUDPTGPSBJVHCN-YMILTQATSA-N
(+)-7-<i>epi</i>-12-hydroxyjasmonoyl-L-isoleucine	-0.11	-0.06	2.56	a 12-hydroxyjasmonoyl-L-amino acid	jasmonoyl-L-isoleucine inactivation	CC[C@H](C)[C@H](NC(=O)C[C@@H]1(CCC(=O)[C@@H](CC=CCCO)1))C([O-])=O	InChIKey=TXHIPUZLOILIIU-RAJZRIHCSA-M
sophoraflavanone B	-0.45	-0.21	19.03	a small molecule	sophoraflavanone G biosynthesis	CC(C)=CCC1(\\C2(/O[C@@H](CC(=O)C(\\C(\\O)=C/C(\\O)=1)=2)C3(/C=CC(\\O)=C/C=3)))	InChIKey=LPEPZZAVFJPLNZ-SFHVURJKSA-N
lupiwighteone	-0.49		19.45	a small molecule	wighteone and luteone biosynthesis // "superpathway of isoflavonoids (via naringenin)"	CC(C)=CCC1(\\C2(/OC=C(C(C(\\C(\\O)=C/C(\\[O-])=1)=2)=O)C3(/C=CC(\\O)=C/C=3)))	InChIKey=YGCCASGFIOIXIN-UHFFFAOYSA-M
(6&alpha;<i>S</i>,11&alpha;<i>S</i>)-2-dimethylallyl-3,6&alpha;,9-trihydroxypterocarpan	-0.45	-0.21	19.05	a small molecule	glyceollin biosynthesis // "superpathway of pterocarpan biosynthesis (via daidzein)"	CC(C)=CCC3(/C(\\O)=C/C4(/OC[C@]1(O)([C@@H](OC2(/C1=CC=C(O)C=2))C(\\C=3)=4)))	InChIKey=TUXXPRXOVFCNPC-VQTJNVASSA-N
7,8-dihydroberberine	-0.45	-0.21	19.88	an alkaloid	(<i>R</i>)-canadine biosynthesis	C2(CC5(\\C=C1(OCOC/1=C/C(\\C3(/N2CC4(\\C(\\C=3)=C/C=C(OC)C(/OC)=4)))=5)))	InChIKey=FZAGOOYMTPGPGF-UHFFFAOYSA-N
1,3-dioctanoyl-1,2,3-butanetriol	-0.45	-0.21	16.75	a small molecule		CCCCCCCCC(=O)OC(C(O)OC(=O)CCCCCCC)C	InChIKey=SRFVRYYBZCVQMB-UHFFFAOYSA-N
4-<i>O</i>-(indol-3-ylacetyl)-&beta;-D-glucose	-0.45	-0.21	18.32	a small molecule	indole-3-acetate activation II	C([C@H]3([C@@H](OC(=O)CC1(/C2(\\C=CC=CC(/NC=1)=2)))[C@H](O)[C@@H](O)[C@H](O)O3))O	InChIKey=XSNPKRVRWPBMKE-JPIRQXTESA-N
(S)-magnoflorine	-0.48	0.34	-17.54	an alkaloid	magnoflorine biosynthesis	C[N+]3(C)(CCC2(\\C=C(OC)C(O)=C1(C4(C(\\C[C@@H](C/1=2)3)=C/C=C(OC)C(O)=4))))	InChIKey=YLRXAIKMLINXQY-ZDUSSCGKSA-O
decylglucoside	-0.44	-0.17	21.16	a small molecule		CCCCCCCCCCO[C@H]1(O[C@@H](C([C@@H](C1O)O)O)CO)	InChIKey=JDRSMPFHFNXQRB-CMTNHCDUSA-N
1,2-dioctanoyl-1-amino-2,3-propanediol	-0.42	-0.18	18.66	a small molecule		CCCCCCCC(=O)NCC(CO)OC(=O)CCCCCCC	InChIKey=KGDBSAYTYOBZHB-UHFFFAOYSA-N
2-O-caffeoylglucarate	-13.21	-13.23	4.75	a small molecule	caffeoylglucarate biosynthesis	C1(/C(C=CC(=O)O[C@H]([C@H]([C@@H]([C@@H](C(=O)[O-])O)O)O)C(=O)[O-])=CC(/O)=C(C=1)/O)	InChIKey=OMIXKOJEIRRAJW-CDEBNWADSA-L
(<i>S</i>)-<i>N</i>-methylcanadine		-0.12	-1.5	an alkaloid	chelerythrine biosynthesis // "noscapine biosynthesis"	C[N+]14([C@H](C2(/C(\\CC1)=C/C3(/OCOC(\\C=2)=3)))CC5(/C=CC(/OC)=C(C(\\C4)=5)/OC))	InChIKey=IPABSWBNWMXCHM-LBOXEOMUSA-N
(<i>E</i>)-1-(L-cysteinylglycin-<i>S</i>-yl)-<i>N</i>-hydroxy-&omega;-(methylsulfanyl)hexan-1-imine	-0.42	-0.17	18.89	an (<i>E</i>)-1-(L-cysteinylglycin-<i>S</i>-yl)-<i>N</i>-hydroxy-&omega;-(methylsulfanyl)alkan-1-imine	glutathione-mediated detoxification II // "glucosinolate biosynthesis from trihomomethionine"	CSCCCCCC(SC[C@H]([N+])C(=O)NCC([O-])=O)=NO	InChIKey=NNTFOZKQHHVOHU-JLBUCRLOSA-N
demethoxycurcumin	-0.45	-0.21	20.78	a secondary metabolite	curcuminoid biosynthesis	COC1(\\C=C(C=CC(/O)=1)C=CC(/O)=C/C(=O)C=CC2(C=CC(\\O)=C/C=2))	InChIKey=UEPVWRDHSPMIAZ-IZTHOABVSA-N
D-galactosylononitol	17.78	-0.21	15.25	a methylated inositol // "a galactosyl inositol"	galactosylcyclitol biosynthesis // "phosphate acquisition" // "B series fagopyritols biosynthesis" // "A series fagopyritols biosynthesis"	CO[C@H]1([C@H]([C@@H]([C@@H]([C@@H]([C@H]1O)O)O)O)O[C@H]2([C@@H]([C@H]([C@H]([C@H](O2)CO)O)O)O))	InChIKey=RSYNCMYDVZFZBP-NRORZAABSA-N
humulone	-0.45	-0.21	17.67	an &alpha; bitter acid	lupulone and humulone biosynthesis // "superpathway of bitter acids biosynthesis"	CC(C)=CCC1(\\C(O)=C(C([C@@](C(\\[O-])=1)(O)CC=C(C)C)=O)C(CC(C)C)=O)	InChIKey=VMSLCPKYRPDHLN-OAQYLSRUSA-M
26,27-dehydrozymosterol	-0.45	-0.21	18.34	a steroid	26,27-dehydrozymosterol metabolism	C[C@H](CCC=C1(CC1))[C@@H]3(CC[C@@H]4(C5(/CC[C@@H]2(C[C@@H](O)CC[C@@](C)2C(/CC[C@](C)34)=5))))	InChIKey=PARCYOHVCUKSCA-BJDKXSRUSA-N
16&alpha;,17-epoxy gibberellin A<sub>4</sub>	0.87	-17.9	-3.32	a gibberellin	gibberellin inactivation III (epoxidation)	C[C@]14(C(=O)O[C@]5(CC[C@H](O)1)([C@@H]6(CC[C@H]3(C[C@](CC2(OC2)3)([C@H]([C@H]45)C([O-])=O)6))))	InChIKey=OQDMPMCCAJSZHB-KJIHWFIGSA-M
4-hydroxylamino-2,6-dinitrotoluene-O-glucoside	-1.35	-0.69	-18.21	a C-nitro compound // "an aromatic compound"	2,4,6-trinitrotoluene degradation	CC2(\\C(\\[N+](=O)[O-])=C/C(\\NOC1([C@H](O)[C@@H](O)[C@H](O)[C@@H](CO)O1))=C/C(\\[N+]([O-])=O)=2)	InChIKey=YBIKXELGQAEZAC-HENWMNBSSA-N
digitoxigenin	-0.24	0.09	-19.41	a steroid	cardenolide glucosides biosynthesis	CC45(CCC(O)CC(CCC3([C@H](CCC2(C)(C(C1(/COC(=O)C=1))CCC(O)23))4))5)	InChIKey=XZTUSOXSLKTKJQ-YCRQSZGSSA-N
2-(3-benzoylphenyl)-3,5,7-trihydroxychromen-4-one	-0.16	0.07	1.5	a flavonol derivative	flavonol glucosylation I	C4(/C=CC(\\C(=O)C3(/C=C(C1(\\OC2(\\C=C([O-])C=C(O)C(/C(C(\\[O-])=1)=O)=2)))C=CC=3))=C/C=4)	InChIKey=ZSVFHCCTKLLREN-UHFFFAOYSA-L
malonyl-furaneol glucopyranoside	-1.28	-0.62	-18.13	an aldehyde or ketone	furaneol and mesifurane biosynthesis	CC1(OC(/C)=C(C(=O)1)/O[C@@H]2([C@H](O)[C@@H](O)[C@H](O)[C@@H](COC(=O)CC([O-])=O)O2))	InChIKey=QJYOBEMAMLWZTF-ALQFCZPRSA-M
benzyladenine-7-<i>N</i>-glucoside	-0.45	-0.21	19.06	an adenine-type cytokinin glucoside	cytokinins 7-<i>N</i>-glucoside biosynthesis	C([C@@H]1(O[C@@H]([C@@H]([C@H]([C@@H]1O)O)O)N2(C3(C(=NC=NC(N=C2)=3)NCC4(/C=CC=CC=4)))))O	InChIKey=MFMRRPHRZQYKIJ-YYZLIPTLSA-N
sinapaldehyde glucoside	17.35	16.51	-0.4	a small molecule	monolignol glucosides biosynthesis	COC2(/C(/O[C@@H]1([C@@H]([C@H]([C@@H]([C@H](O1)CO)O)O)O))=C(C=C(C=2)C=CC=O)/OC)	InChIKey=OYTCTPHTVUEGCL-GCPOEHJPSA-N
1-palmitoleylglycerol 3-phosphate	-0.49	-0.27	18.89	a 1-acyl-<i>sn</i>-glycerol 3-phosphate	phosphatidate metabolism, as a signaling molecule (Chlamydomonas) // "phospholipases (Chlamydomonas)" // "triacylglycerol biosynthesis (Chlamydomonas)" // "diacylglycerol and triacylglycerol biosynthesis" // "CDP-diacylglycerol biosynthesis I" // "phosphatidylglycerol biosynthesis II (non-plastidic)" // "CDP-diacylglycerol biosynthesis II" // "phosphatidylglycerol biosynthesis I (plastidic)" // "…	C(OC(CCCCCCCC=CCCCCCC)=O)[C@@H](COP(=O)(O)O)O
dIDP	-0.57	0.2	-19.97	a purine 2'-deoxyribonucleoside 5'-diphosphate // "a nucleic acid component"	phytol salvage pathway // "pyrimidine deoxyribonucleosides salvage" // "superpathway of pyrimidine deoxyribonucleoside salvage"	C(OP(=O)([O-])OP(=O)([O-])[O-])[C@@H]1(O[C@H](C[C@H](O)1)N2(C=NC3(C(=O)NC=NC2=3)))	InChIKey=BKUSIKGSPSFQAC-RRKCRQDMSA-K
9-<i>cis</i>-10'-apo-&beta;-carotenal	-0.8	-0.93	-1.34	an apocarotenoid	5-deoxystrigol biosynthesis	CC(\\C=CC=C(C)C=CC1(/C(C)(C)CCCC(\\C)=1))=C/C=CC=C(C=CC=O)C	InChIKey=PJEHRCCPERVGEC-OLTPUEGQSA-N
tetrahydrothiamine diphosphate	-0.57	0.26	-20	an organosulfur compound		CC2(C(CCOP(=O)([O-])OP(=O)([O-])[O-])SCN(CC1(/C(N)=NC(C)=NC=1))2)	InChIKey=QMLRZDVHAMEWFV-UHFFFAOYSA-K
glucotropaeolin	-1.07	0.04	-18.51	an aromatic glucosinolate	glucosinolate biosynthesis from phenylalanine // "glucosinolate activation" // "aromatic glucosinolate activation"	C(O)[C@H]2([C@@H](O)[C@H](O)[C@@H](O)[C@H](SC(CC1(/C=CC=CC=1))=NOS(=O)(=O)[O-])O2)	InChIKey=QQGLQYQXUKHWPX-RFEZBLSLSA-M
dADP	-0.9	0.16	-19.55	a purine 2'-deoxyribonucleoside 5'-diphosphate // "a nucleic acid component"	phytol salvage pathway // "pyrimidine deoxyribonucleosides salvage" // "superpathway of pyrimidine deoxyribonucleoside salvage" // "adenosine deoxyribonucleotides <i>de novo</i> biosynthesis" // "superpathway of adenosine nucleotides <i>de novo</i> biosynthesis I" // "superpathway of purine nucleotides <i>de novo</i> biosynthesis I" // "purine deoxyribonucleosides salvage"	C([C@H]3([C@H](C[C@H](N1(C2(N=CN=C(C(N=C1)=2)N)))O3)O))OP(OP([O-])([O-])=O)([O-])=O	InChIKey=DAEAPNUQQAICNR-RRKCRQDMSA-K
&beta;-peltatin-A methyl ether	-0.45	-0.21	17.35	a lignan	6-methoxypodophyllotoxin biosynthesis	COC1(/C(/OC)=C(C=C(C=1)[C@@H]3([C@@H]5(C(=O)OC[C@H](CC4(C(/OC)=C2(C(\\OCO2)=C/C3=4)))5)))/OC)	InChIKey=BFKORKXLSJUYSS-RQUSPXKASA-N
4'-hydroxy-rot-2'-enonate	-0.45	-0.21	17.9	a rotenoid	rotenoid biosynthesis I	CC(\\CO)=C/CC4(\\C(\\[O-])=C/C=C2(C(\\O[C@H]1(COC3(\\C=C(C(\\OC)=C/C(/[C@@H]1C2=O)=3)OC)))=4))	InChIKey=STQIAJVGXVCTSD-OIZWPPBTSA-M
5&alpha;-cholesta-7,24-dien-3&beta;-ol	-0.45	-0.21	16.93	a &Delta;7-sterol // "a 3&beta;-hydroxysteroid"	sphingolipid biosynthesis (plants) // "cholesterol biosynthesis I" // "plant sterol biosynthesis II"	CC(C)=CCC[C@@H](C)[C@@H]1(CC[C@H]3([C@@](C)1CC[C@@H]2([C@]4(C)([C@H](CC=C23)C[C@@H](O)CC4))))	InChIKey=PKEPPDGGTSZLBL-SKCNUYALSA-N
&beta;-peltatin	-0.45	-0.21	17.4	a lignan	6-methoxypodophyllotoxin biosynthesis	COC1(\\C=C(C=C(OC)C(/OC)=1)[C@@H]3([C@@H]5(C(=O)OC[C@H](CC4(C(/O)=C2(C(\\OCO2)=C/C3=4)))5)))	InChIKey=HLBPOYVRLSXWJJ-PDSMFRHLSA-N
podophyllotoxin	8.94	0.03	8.85	a toxin // "a lignan"	podophyllotoxin glucosides metabolism	COC1(\\C=C(C=C(OC)C(/OC)=1)[C@@H]3([C@@H]5([C@@H]([C@@H](O)C4(C=C2(OCOC/2=C/C3=4)))COC(=O)5)))	InChIKey=YJGVMLPVUAXIQN-XVVDYKMHSA-N
narcotine hemiacetal	-0.45	-0.21	17.72	an alkaloid	noscapine biosynthesis	COC5(/C(/OC)=C1(C(\\[C@H](OC(O)1)[C@@H]2(C3(\\C(\\CCN(C)2)=C/C4(/OCOC(\\C(/OC)=3)=4))))=C/C=5))	InChIKey=TZNFGVJRQISOHK-HVHHGIHYSA-N
(20<i>R</i>,22<i>R</i>)-dihydroxycholesterol	-0.41	3.39	2.89	a small molecule		CC(C)CC[C@@H](O)[C@@](O)(C)[C@@H]3(CC[C@@H]4([C@H]2(CC=C1(C[C@@H](O)CC[C@@](C)1[C@H]2CC[C@](C)34))))	InChIKey=ISBSSBGEYIBVTO-TYKWNDPBSA-N
P1-uridyl-P2-methyl diphosphate	-0.86	0.17	-18.35	a small molecule		COP(=O)([O-])OP(=O)([O-])OC[C@H]1([C@@H](O)[C@@H](O)[C@@H](O1)N2(C=CC(=O)NC(=O)2))	InChIKey=QEXWQSCECHIMQL-ZOQUXTDFSA-L
dTDP group	-0.66	-0.24	-19.93	a nucleoside phosphate group		CC1(/C(=O)NC(=O)N(C=1)[C@@H]2(C[C@H](O)[C@@H](COP(=O)([O-])OP(=O)([O-])O)O2))
glucoiberin	-0.86	-0.08	-20.06	an &omega;-(methylsulfinyl)alkyl-glucosinolate	glucosinolate activation // "glucosinolate biosynthesis from homomethionine"	CS(=O)CCCC(=NOS(=O)(=O)[O-])S[C@H]1(O[C@H](CO)[C@@H](O)[C@H](O)[C@@H](O)1)	InChIKey=PHYYADMVYQURSX-WWFIZPDBSA-M
marneral		-0.04	14.56	a triterpenoid	marneral biosynthesis	CC(C)=CCCC(/C)=C/CCC(/C)=C/CC[C@]1(C)([C@H](C)CCC([C@@H](CC[CH]=O)1)=C(C)C)	InChIKey=VNBRFEUEYRHQBM-OPEBEUCHSA-N
&beta;-citraurin	-0.22	0.46	-17.46	an apocarotenoid	crocetin biosynthesis // "carotenoid cleavage"	CC(\\C=CC=C(C=CC1(/C(C)(C)C[C@@H](CC(\\C)=1)O))C)=C/C=CC=C(C=CC=C([CH]=O)C)C	InChIKey=AVPAEFHIEZLSLZ-QCPGYTKSSA-N
2,4-diamino-6-ethyl-5,3'-(2-trifluoromethyl-4-sulphonamidophenoxy)prop-1'-yloxypyrimidine	0.05	0.44	-18.06	a small molecule		CCC2(C(\\OCCCOC1(/C(\\C(F)(F)F)=C/C(\\S(=O)(=O)N)=C/C=1))=C(N)/N=C(N)N=2)	InChIKey=YPZHSOSGSVUVIV-UHFFFAOYSA-N
4&alpha;-formyl,4&beta;,14&alpha;-dimethyl-9&beta;,19-cyclo-5&alpha;-ergost-24(24<sup>1</sup>)-en-3&beta;-ol	-3.94	-0.29	-7.02	a 3&beta;-hydroxysteroid	sphingolipid biosynthesis (plants) // "phytosterol biosynthesis (plants)"	CC(C)C(CC[C@@H](C)[C@@H]3(CC[C@@]4(C)([C@H]1(CC[C@@H]5([C@@]([CH]=O)(C)[C@@H](O)CC[C@@]2(C[C@@]12CC[C@](C)34)5)))))=C	InChIKey=FAQRUJCAUFLERP-NIGXAPAPSA-N
2'-chloro-2'-deoxyuridine-5'-diphosphate	-1.17		-18.52	a pyrimidine		C(OP(=O)([O-])OP(=O)([O-])[O-])[C@@H]1(O[C@H](C(Cl)[C@H](O)1)N2(C=CC(=O)NC(=O)2))	InChIKey=WGHTVAKXVHPEEP-RNMRRNDGSA-K
luteolin 7-<i>O</i>-&beta;-D-glucoside	-0.37	-0.05	-17.63	a hydroxyflavone	luteolin glycosides biosynthesis	C4(\\C=C(O)C(\\O)=C/C(\\C1(/OC2(\\C=C(C=C(O)C(/C(=O)C=1)=2)O[C@H]3(O[C@H](CO)[C@@H](O)[C@H](O)[C@@H](O)3))))=4)	InChIKey=PEFNSGRTCBGNAN-QNDFHXLGSA-N
6-<i>C</i>-glucosyl-2-hydroxynaringenin	0.47	0.56	-18.22	a flavanone glycoside	flavonoid di-C-glucosylation // "naringenin <i>C</i>-glucosylation"	C(O)[C@H]4([C@@H](O)[C@H](O)[C@@H](O)[C@H](C3(\\C(/O)=C2(C(\\OC(O)(C1(/C=CC(\\O)=C/C=1))CC(=O)2)=C/C(\\[O-])=3)))O4)	InChIKey=XANYTXLTBWWGAJ-QMPIUYLCSA-M
calycosin 7-<i>O</i>-glucoside	0.9	0.11	-18.8	an isoflavone	calycosin 7-<i>O</i>-glucoside biosynthesis	COC4(\\C=CC(\\C1(/C(=O)C3(/C(\\OC=1)=C/C(\\O[C@@H]2([C@@H]([C@H]([C@H](O)[C@H](O2)CO)O)O))=C/C=3)))=C/C(/O)=4)	InChIKey=WACBUPFEGWUGPB-MIUGBVLSSA-N
hesperitin-7-O-&beta;-D-glucoside	0.41	0.11	-18.8	a flavanone-7-O-&beta;-D-glucoside	hesperitin glycoside biosynthesis	COC4(\\C=CC(\\C1(OC2(\\C=C(C=C(C(/C(C1)=O)=2)O)O[C@H]3(O[C@@H]([C@H]([C@@H]([C@H]3O)O)O)CO))))=C/C(/O)=4)	InChIKey=ADSYMQORONDIDD-KTTVMXGCSA-N
sakuranin	0.31	0.43	-18.67	a flavonol derivative	flavonol glucosylation I	COC3(/C=C(OC1(O[C@H](CO)[C@@H](O)[C@H](O)[C@@H](O)1))C4(/C(=O)C[C@@H](C2(/C=CC(\\O)=C/C=2))OC(\\C=3)=4))	InChIKey=NEPMMBQHELYZIW-GKLMPROBSA-N
phytyl diphosphate	0.36	-0.01	3.18	a diterpenoid	phytol salvage pathway // "phylloquinol biosynthesis" // "phytyl diphosphate biosynthesis" // "superpathway of phylloquinol biosynthesis" // "vitamin E biosynthesis (tocopherols)" // "chlorophyll cycle" // "chlorophyll <i>a</i> biosynthesis III" // "chlorophyll <i>a</i> biosynthesis I"	CC(CCC[C@H](CCC[C@H](CCCC(/C)=C/COP([O-])(=O)OP([O-])(=O)[O-])C)C)C	InChIKey=ITPLBNCCPZSWEU-PYDDKJGSSA-K
triacontanoate	-0.45	-0.21	17.47	a saturated fatty acid // "a very-long-chain 2,3,4-saturated fatty acid"	ceramide degradation // "acyl-[acyl-carrier protein] thioesterase pathway" // "phospholipases" // "phosphatidylcholine acyl editing" // "triacylglycerol degradation" // "acyl-CoA hydrolysis" // "fatty acid &alpha;-oxidation I" // "fatty acid &beta;-oxidation II (peroxisome)" // "superpathway of glyoxylate cycle and fatty acid degradation" // "methyl ketone biosynthesis (engineered)" // "alkane ox…	CCCCCCCCCCCCCCCCCCCCCCCCCCCCCC([O-])=O	InChIKey=VHOCUJPBKOZGJD-UHFFFAOYSA-M
betulinate	-1.15	-0.33	-22.53	a triterpenoid	betulinate biosynthesis	C=C(C)[C@H]5(CC[C@]4(C(=O)[O-])(CC[C@]3(C)([C@H](CC[C@H]2([C@@]1([C@H](C(C)(C)[C@H](CC1)O)CC[C@](C)23)(C)))[C@@H]45)))	InChIKey=QGJZLNKBHJESQX-FZFNOLFKSA-M
glycyrrhetaldehyde	-0.37	-0.39	-20.76	a triterpenoid	glycyrrhetinate biosynthesis	C[C@@]4(C)(C3(CC[C@@]2(C)([C@]1(C)(CC[C@]5([C@H](C/1=C/C(C2[C@](C)3CC[C@H](O)4)=O)C[C@]([CH]=O)(C)CC5)C))))	InChIKey=OTKNPGBTQXVJNH-DFRAZXLMSA-N
3,20-dimethyl-1,2,21,22-tetradehydro-2,3,20,21-tetrahydrobotryococcene	-0.45	-0.21	19.88	a triterpenoid	botryococcenes and methylated squalene biosynthesis	C=CC(C)(C=CC(C)CCC=C(C)CCC(C(C)=C)C)CCC=C(C)CCC(C)C(C)=C	InChIKey=YIERDWVPDSIPLW-PTFXNVDKSA-N
11-deoxoglycyrrhetinate	-0.45	-0.21	19.31	a triterpenoid	glycyrrhetinate biosynthesis	C[C@@]4(C)(C3(CC[C@@]2(C)([C@]1(C)(CC[C@]5([C@H](C/1=C/CC2[C@](C)3CC[C@H](O)4)C[C@](C(O)=O)(C)CC5)C))))	InChIKey=JZFSMVXQUWRSIW-YHSIJDKQSA-N
lupan-3&beta;,20-diol	-0.45	-0.21	16.96	a triterpenoid		CC1(C)([C@H](CC[C@]5([C@H]1CC[C@]4(C)([C@@H](CC[C@H]3([C@@H]2([C@](C)(CC[C@@H](C(C)(C)O)2)CC[C@](C)34)))5))(C))O)	InChIKey=YDNYDUBBAZTLTQ-LIVJDELJSA-N
2',3,4,4',6'-pentahydroxychalcone 4'-<i>O</i>-&beta;-D-glucoside	-0.45	-0.21	17.5	a chalcone	cuticular wax biosynthesis // "aurone biosynthesis"	[C@H]3(OC2(/C=C(O)C(/C(=O)C=CC1(C=CC(/O)=C(C=1)/O))=C(C=2)/O))(O[C@H](CO)[C@@H](O)[C@H](O)[C@@H](O)3)	InChIKey=GZTXEEPKLNRIEL-LYXDKPSQSA-N
FMN	0.67	0.43	-18.69	a flavin electron carrier // "an oxidized flavin"	flavin biosynthesis I (bacteria and plants)	CC1(/C(\\C)=C/C2(/N(C[C@H](O)[C@H](O)[C@H](O)COP([O-])(=O)[O-])C3(C(=NC(\\C=1)=2)C(=O)[N-]C(=O)N=3)))	InChIKey=ANKZYBDXHMZBDK-SCRDCRAPSA-K
6-hydroxyteasterone		20.04	18.81	a brassinosteroid	brassinosteroid biosynthesis I // "superpathway of C28 brassinosteroid biosynthesis"	CC(C)[C@H](C)[C@@H](O)[C@H](O)[C@@H](C)[C@@H]3(CC[C@@H]4([C@H]2(C[C@H](O)[C@@H]1(C[C@@H](O)CC[C@@](C)1[C@H]2CC[C@](C)34))))	InChIKey=QQPPQQNYVDYNAA-QJZSHHPBSA-N
linalyl 6-<i>O</i>-&alpha;-<i>L</i>-arabinopyranosyl- &beta;-<i>D</i>-glucopyranoside	-0.01	-0.14	3.07	a monoterpenol // "a carbohydrate derivative"	phosphate acquisition // "tea aroma glycosidic precursor bioactivation"	C=CC(O[C@@H]1([C@@H]([C@H]([C@H](O)[C@H](O1)CO[C@@H]2([C@@H]([C@@H](O)[C@H](CO2)O)O))O)O))(C)CCC=C(C)C	InChIKey=OKNPZRJNRSGKME-AVIYVUCBSA-N
(<i>22R,23R</i>)-28-homocastasterone	-0.3	-0.28	-20.76	a brassinosteroid		CC[C@H]([C@H]([C@@H]([C@H](C2([C@]3(CCC4([C@@]1(C[C@H]([C@H](C[C@@H]1C(=O)CC(C(CC2)3)4)O)O)C))(C)))C)O)O)C(C)C	InChIKey=WADMTJKRYLAHQV-BSBOPDPFSA-N
(20<i>S</i>)-protopanaxadiol	1.5	1.64	-20	a protopanaxadiol-type ginsenoside with no glycosidic modification at position 3	ginsenosides biosynthesis	CC(C)=CCC[C@]([C@H]1([C@H]2([C@@](C)(CC1)[C@]3(C)(CC[C@@H]4(C([C@@H](O)CC[C@](C)([C@@H](C[C@@H](O)2)3)4)(C)C)))))(C)O	InChIKey=PYXFVCFISTUSOO-HKUCOEKDSA-N
24-epibrassinolide	-0.33	-0.14	-18.89	a brassinosteroid		CC([C@H]([C@H]([C@@H]([C@@H](C)C2([C@]3(CCC4([C@@]1(C[C@H]([C@H](C[C@@H]1C(=O)OCC([C@H](CC2)3)4)O)O)C))(C)))O)O)C)C	InChIKey=IXVMHGVQKLDRKH-FUFWTINHSA-N
D-<i>myo</i>-inositol (1,2,3,4) tetrakisphosphate	-0.32	-0.28	-18.6	a <i>myo</i>-inositol tetrakisphosphate	phosphate acquisition // "phytate degradation II"	[C@@H]1(O)([C@@H](O)[C@H](OP([O-])([O-])=O)[C@H](OP([O-])([O-])=O)[C@H](OP(=O)([O-])[O-])[C@@H](OP(=O)([O-])[O-])1)	InChIKey=MRVYFOANPDTYBY-JIGFOQOZSA-F
protopanaxatriol	-0.12	-0.27	-20.15	a protopanaxatriol-type ginsenoside with no glycosidic modification at position 6	ginsenosides biosynthesis	CC(C)=CCC[C@]([C@H]1([C@H]2([C@@](C)(CC1)[C@]3(C)(C[C@H](O)[C@@H]4(C([C@@H](O)CC[C@](C)([C@@H](C[C@@H](O)2)3)4)(C)C)))))(C)O	InChIKey=SHCBCKBYTHZQGZ-CJPZEJHVSA-N
BPH-674	-0.35	-0.31	-21.25	a small molecule		C(P(O[K])(=O)O[K])(P(O[K])(O[K])=O)CCCC2(/C=CC(\\C1(/C=CC=CC=1))=C/C=2)	InChIKey=BCYAVSRUQADSRS-UHFFFAOYSA-J
(<i>E</i>)-1-(glutathion-<i>S</i>-yl)-<i>N</i>-hydroxy-&omega;-(methylsulfanyl)nonan-1-imine	7.01	2.9	-4.12	an (<i>E</i>)-1-(glutathion-<i>S</i>-yl)-<i>N</i>-hydroxy-&omega;-(methylsulfanyl)alkan-1-imine	glutathione-mediated detoxification II // "glucosinolate biosynthesis from hexahomomethionine"	CSCCCCCCCCC(SC[C@H](NC(CC[C@@H](C(=O)[O-])[N+])=O)C(=O)NCC([O-])=O)=NO	InChIKey=GPZLPQNMTKAECU-KWBVRPRRSA-M
MoO<sub>2</sub>-molybdopterin cofactor	-0.26	-0.08	-3.96	a W/Mo-pterin cofactor	molybdenum cofactor biosynthesis // "thio-molybdenum cofactor biosynthesis"	C(OP([O-])(=O)[O-])[C@H]1(C4(/S[Mo](=O)(=O)SC(\\[C@@H]2([C@@H](O1)NC3(\\N=C(N)NC(=O)C(\\N2)=3)))=4))	InChIKey=HDAJUGGARUFROU-JSUDGWJLSA-J
2-thiouridine 5'-triphosphate	-0.27	-0.18	-18.62	a small molecule		C(OP(OP(OP([O-])([O-])=O)([O-])=O)([O-])=O)[C@@H]1(O[C@H]([C@H](O)[C@H](O)1)N2(C=CC(=O)NC(=S)2))	InChIKey=KHYOUGAATNYCAZ-XVFCMESISA-J
uridine-5'-diphosphate bromoacetol	-0.28	-0.17	-18.63	a bromoaromatic compound // "a pyrimidine"		C(Br)C(=O)COP(=O)([O-])OP(=O)([O-])OC[C@@H]1(O[C@H]([C@H](O)[C@H](O)1)N2(C=CC(=O)NC(=O)2))	InChIKey=KUNNVLZBOWEQIC-QCNRFFRDSA-L
3'-phosphoadenylyl-sulfate	-19.32	-0.36	-19.44	a small molecule	sulfate activation for sulfonation // "jasmonoyl-L-isoleucine inactivation" // "hydroxyjasmonate sulfate biosynthesis" // "brassinosteroids inactivation" // "quercetin sulfate biosynthesis" // "superpathway of flavones and derivatives biosynthesis" // "glucosinolate biosynthesis from trihomomethionine" // "glucosinolate biosynthesis from tetrahomomethionine" // "glucosinolate biosynthesis from pe…	C([C@H]3([C@H]([C@H]([C@H](N1(C2(N=CN=C(C(N=C1)=2)N)))O3)O)OP(=O)([O-])[O-]))OP(OS([O-])(=O)=O)([O-])=O	InChIKey=GACDQMDRPRGCTN-KQYNXXCUSA-J
UDP-&beta;-L-arabinopyranose	-0.32	-0.36	-18.57	UDP-L-arabinopyranose	UDP-&beta;-L-arabinose biosynthesis II (from &beta;-L-arabinose) // "isovitexin glycosides biosynthesis" // "UDP-&beta;-L-arabinose biosynthesis I (from UDP-&alpha;-D-xylose)" // "indole-3-acetate inactivation IX" // "superpathway of indole-3-acetate conjugate biosynthesis" // "xylan biosynthesis"	C3(O[C@H](OP(=O)([O-])OP(=O)([O-])OC[C@@H]1(O[C@H]([C@H](O)[C@H](O)1)N2(C=CC(=O)NC(=O)2)))[C@H](O)[C@@H](O)[C@@H](O)3)	InChIKey=DQQDLYVHOTZLOR-IAZOVDBXSA-L
&epsilon;-carotene	-0.45	-0.21	20.11	a carotene	lactucaxanthin biosynthesis	CC(\\C=CC=C(C)C=C[C@@H]1(C(\\C)=C/CCC(C)(C)1))=C/C=CC=C(C)C=CC=C(C)C=C[C@H]2(C(C)(C)CCC=C(C)2)	InChIKey=QABFXOMOOYWZLZ-GDBZIMIPSA-N
&beta;-zeacarotene	-0.45	-0.21	19.08	a carotene		CC(C)=CCCC(/C)=C/CCC(/C)=C/C=CC(/C)=C/C=CC=C(C)C=CC=C(C)C=CC1(/C(C)(C)CCCC(\\C)=1)	InChIKey=MICBIPJWKDDGNL-FILYMEKXSA-N
quercetin 3,3',7-trissulfate	0.45	-0.44	-18.81	a small molecule	quercetin sulfate biosynthesis // "superpathway of flavones and derivatives biosynthesis"	C3(\\C=C(O)C(\\OS(=O)(=O)[O-])=C/C(\\C1(\\OC2(\\C=C(C=C(O)C(/C(=O)C(\\OS(=O)(=O)[O-])=1)=2)OS(=O)(=O)[O-])))=3)	InChIKey=WWSKELVNYRIPTL-UHFFFAOYSA-K
5-bromo-dCTP	-1.01	-0.4	-17.97	an organobromine compound // "a pyrimidine"		C([C@H]2([C@H](C[C@H](N1(C(N=C(C(\\Br)=C/1)N)=O))O2)O))OP(=O)([O-])OP(OP([O-])([O-])=O)([O-])=O	InChIKey=UYPHYZSNRPGPAN-RRKCRQDMSA-J
15-<i>cis</i>-phytoene	-0.45	-0.21	17.4	a carotenoid	neurosporene biosynthesis // "<i>trans</i>-lycopene biosynthesis I" // "&beta;-carotene biosynthesis (engineered)" // "<i>trans</i>-lycopene biosynthesis II (oxygenic phototrophs and green sulfur bacteria)" // "superpathway of carotenoid biosynthesis in plants"	CC(C)=CCCC(/C)=C/CCC(/C)=C/CCC(/C)=C/C=CC=C(CCC=C(CCC=C(CCC=C(C)C)C)C)C	InChIKey=YVLPJIGOMTXXLP-BHLJUDRVSA-N
lycopaoctaene	-0.45	-0.21	21.92	a hydrocarbon // "a tetraterpenoid"	lycopadiene biosynthesis	CC(C)=CCCC(/C)=C/CCC(/C)=C/CCC(/C)=C/CCC=C(C)CCC=C(C)CCC=C(C)CCC=C(C)C	InChIKey=BGVXBZXEFXMRGJ-DPOFWPLISA-N
<i>all-trans</i> phytofluene	-0.45	-0.21	23.22	a carotenoid	neurosporene biosynthesis // "<i>trans</i>-lycopene biosynthesis I" // "&beta;-carotene biosynthesis (engineered)"	CC(C)=CCCC(/C)=C/CCC(/C)=C/C=CC(/C)=C/C=CC=C(C)CCC=C(C)CCC=C(C)CCC=C(C)C	InChIKey=OVSVTCFNLSGAMM-OUOOUFEBSA-N
(2<i>E</i>6<i>E</i>,10<i>E</i>,14<i>E</i>,18<i>E</i>,22<i>E</i>)-lycopahexaene	-0.45	-0.21	22.05	a hydrocarbon // "a tetraterpenoid"	lycopadiene biosynthesis	CC(C)=CCCC(/C)=C/CCC(/C)=C/CCC(/C)=C/CCC=C(C)CCC=C(C)CCC[C@H](C)CCCC(C)C	InChIKey=KMHKIEPZTSCFEX-UBAVNZOLSA-N
(2<i>E</i>,6<i>E</i>,10<i>E</i>,14<i>E</i>,18<i>E</i>)-lycopapentaene	-0.45	-0.21	20.7	a hydrocarbon // "a tetraterpenoid"	lycopadiene biosynthesis	CC(C)=CCCC(/C)=C/CCC(/C)=C/CCC(/C)=C/CCC=C(C)CCC[C@H](C)CCC[C@H](C)CCCC(C)C	InChIKey=UKCLJWRKPGPSLL-NGXRMTJOSA-N
9,9'-di-<i>cis</i>-&zeta;-carotene	16.68	-0.23	24	a carotene	<i>trans</i>-lycopene biosynthesis II (oxygenic phototrophs and green sulfur bacteria) // "superpathway of carotenoid biosynthesis in plants"	CC(C)=CCCC(/C)=C/CCC(\\C)=C/C=CC(/C)=C/C=CC=C(C=CC=C(C)CCC=C(CCC=C(C)C)C)C	InChIKey=BIWLELKAFXRPDE-ZURBLSRNSA-N
9,15,9'-tri-<i>cis</i>-&zeta;-carotene	-0.45	-0.21	24	a carotene	<i>trans</i>-lycopene biosynthesis II (oxygenic phototrophs and green sulfur bacteria) // "superpathway of carotenoid biosynthesis in plants"	CC(C)=CCCC(/C)=C/CCC(\\C)=C/C=CC(/C)=C/C=CC=C(C=CC=C(CCC=C(CCC=C(C)C)C)C)C	InChIKey=BIWLELKAFXRPDE-LMARSQGMSA-N
dTDP-&alpha;-D-glucose	-0.13	-0.24	-18.12	an NDP-&alpha;-D-glucose // "a dTDP-sugar"	dTDP-L-rhamnose biosynthesis // "dTDP-L-rhamnose biosynthesis II"	CC1(/C(=O)NC(=O)N(C=1)[C@@H]3(C[C@H](O)[C@@H](COP(=O)([O-])OP(=O)([O-])O[C@@H]2(O[C@H](CO)[C@@H](O)[C@H](O)[C@@H](O)2))O3))	InChIKey=YSYKRGRSMLTJNL-URARBOGNSA-L
CDP-&alpha;-D-glucose	-0.25	-0.41	-18.16	an NDP-&alpha;-D-glucose // "a CDP-sugar"		C([C@@H]3(O[C@H](OP(OP(OC[C@H]2([C@H]([C@H]([C@H](N1(C(N=C(C=C1)N)=O))O2)O)O))([O-])=O)([O-])=O)[C@@H]([C@H]([C@@H]3O)O)O))O	InChIKey=CGPHZDRCVSLMCF-JZMIEXBBSA-L
<i>trans</i>-zeatin riboside triphosphate	-0.45	-0.21	17.54	a small molecule	<i>trans</i>-zeatin biosynthesis	CC(\\CO)=C/CNC2(=NC=NC3(N([C@@H]1([C@@H]([C@@H]([C@H](O1)COP(OP(=O)([O-])OP(=O)([O-])O)([O-])=O)O)O))C=NC2=3))	InChIKey=AOFQQLZNDSBFLN-HNNGNKQASA-K
7-<i>O</i>-methylvitexin 2''-<i>O</i>-&beta;-L-rhamnoside	16.79	17.08	6.58	a small molecule	vitexin and derivatives biosynthesis	C[C@H]1(O[C@@H]([C@@H]([C@@H]([C@@H](O)1)O)O)O[C@H]2([C@H]([C@H](O)[C@@H](CO)O[C@H]2C5(\\C(\\OC)=C/C(/O)=C4(C(\\OC(\\C3(/C=CC(\\O)=C/C=3))=C/C(=O)4)=5)))O))	InChIKey=HFUYHHROXLKXRR-FKTIEMRLSA-N
ADP-5-ethyl-4-methylthiazole-2-carboxylate	-0.45	-0.26	20.1	a small molecule	thiazole biosynthesis III (eukaryotes) // "superpathway of thiamine diphosphate biosynthesis III (eukaryotes)"	CC4(/N=C(C(=O)[O-])SC(\\CCOP([O-])(=O)OP([O-])(=O)OC[C@@H]3(O[C@@H](N2(C1(=NC=NC(/N)=C1/N=C2)))[C@H](O)[C@H](O)3))=4)	InChIKey=VGXBGQACJQRWLV-LKGUXBDMSA-K
(2<i>E</i>,10<i>E</i>,14<i>E</i>,18<i>E</i>)-lycopatetraene	-0.45	-0.21	17.94	a hydrocarbon // "a tetraterpenoid"	lycopadiene biosynthesis	CC(C)=CCC[C@@H](C)CCCC(/C)=C/CCC(/C)=C/CCC=C(C)CCC[C@H](C)CCC[C@H](C)CCCC(C)C	InChIKey=IBYIKDCSISCFLZ-JCLQIIOJSA-N
(2<i>E</i>,14<i>E</i>,18<i>E</i>)-lycopatriene	-0.45	-0.21	19.74	a hydrocarbon // "a tetraterpenoid"	lycopadiene biosynthesis	CC(C)=CCC[C@@H](C)CCC[C@@H](C)CCCC(/C)=C/CCC=C(C)CCC[C@H](C)CCC[C@H](C)CCCC(C)C	InChIKey=YFTFJUGGUKHGMJ-PQPPKSKMSA-N
all-<i>trans</i>-hexaprenyl diphosphate	0.71	-0.01	-3.75	an all-<i>trans</i>-polyisoprenyl diphosphate	polyisoprenoid biosynthesis	CC(C)=CCCC(/C)=C/CCC(/C)=C/CCC(/C)=C/CCC(/C)=C/CCC(/C)=C/COP(=O)([O-])OP(=O)([O-])[O-]	InChIKey=NGFSMHKFTZROKJ-MMSZMYIBSA-K
pelargonidin 3-<i>O</i>-&beta;-D-p-coumaroylglucoside	0.33	0.49	-3.25	a small molecule	anthocyanidin acylglucoside and acylsambubioside biosynthesis // "pelargonidin conjugates biosynthesis" // "superpathway of anthocyanin biosynthesis (from pelargonidin 3-O-glucoside)"	C([C@@H]1(O[C@H]([C@@H]([C@H]([C@@H]1O)O)O)OC2(/C(=[O+]C3(/C=C(C=C(C(/C=2)=3)[O-])[O-]))C4(/C=CC(\\O)=C/C=4))))OC(C=CC5(C=CC(\\O)=C/C=5))=O	InChIKey=VZPBBOAZFCREMQ-SHPGVJHPSA-M
isovitexin 2''-O-&beta;-D-glucoside	0.29	0.47	-2.87	a small molecule	isovitexin glycosides biosynthesis	C5(\\C=C(O)C=CC(\\C1(/OC4(/C(/C(=O)C=1)=C(C(/[C@H]3(O[C@H](CO)[C@@H](O)[C@H](O)[C@@H](O[C@H]2(O[C@H](CO)[C@@H](O)[C@H](O)[C@@H](O)2))3))=C(C=4)/[O-])/O)))=5)	InChIKey=RQTTXGQDIROLTQ-FASGCTRLSA-M
ppGpp	-1.37	-0.94	-21.18	a modified nucleotide	ppGpp biosynthesis	C(OP(=O)([O-])OP(=O)(O)[O-])[C@@H]1(O[C@H]([C@H](O)[C@H](OP([O-])(=O)OP([O-])([O-])=O)1)N2(C=NC3(C(=O)NC(N)=NC2=3)))	InChIKey=BUFLLCUFNHESEH-UUOKFMHZSA-I
9'-<i>cis</i>-neoxanthin	-0.45	-0.21	16.98	a 9-<i>cis</i>-epoxycarotenoid	neoxanthin biosynthesis // "superpathway of carotenoid biosynthesis in plants" // "abscisic acid biosynthesis"	CC(\\C=CC=C(C)[CH]\\=C/=C1([C@@](O)(C)C[C@@H](O)CC(C)(C)1))=C/C=CC=C(C)C=CC=C(C)C=C[C@@]23(C(C)(C)C[C@H](O)C[C@@](C)(O2)3)	InChIKey=PGYAYSRVSAJXTE-OQASCVKESA-N
neohesperidin	-0.41	-0.17	17.16	a small molecule	hesperitin glycoside biosynthesis	C[C@H]5(O[C@H](OC1([C@H]([C@@H]([C@H](O[C@H]1OC3(/C=C2(OC(CC(C\\2=C(C=3)/O)=O)C4(/C=C(C(\\OC)=C/C=4)O))))CO)O)O))[C@@H]([C@@H]([C@H]5O)O)O)	InChIKey=ARGKVCXINMKCAZ-BKCQJFQGSA-N
kaempferol 3-<i>O</i>-(4\-<i>O</i>-<i>p</i>-coumaroyl)-glucoside"	0.31	0.28	-3.14	a flavonol derivative	flavonol acylglucoside biosynthesis I - kaempferol derivatives // "flavonol glucosylation I"	C(O[C@@H]4([C@H](O)[C@@H](O)[C@H](OC2(/C(=O)C3(\\C(\\OC(/C1(/C=CC(\\O)=C/C=1))=2)=C/C(\\O)=C/C(/O)=3)))O[C@@H]4CO))(=O)C=CC5(C=CC(\\O)=C/C=5)	InChIKey=MUKDIIVMECIYQR-BQCCONABSA-N
chlorophyllide <i>a</i>	0.44	0.23	-18.57	a chlorophyllide // "an organometallic compound"	chlorophyll <i>a</i> degradation I // "chlorophyll <i>a</i> degradation III" // "chlorophyll <i>a</i> biosynthesis II" // "chlorophyll cycle" // "chlorophyll <i>a</i> biosynthesis III" // "chlorophyll <i>a</i> biosynthesis I"	C=CC4(/C(\\C)=C3(C=C9([C@@H](C)[C@H](CCC(=O)[O-])C8(=N(.[Mg]25(.N1(=C(C(\\CC)=C(C)/C/1=C/C(/N23)=4)C=C6(C(/C)=C7(C(/N56)=C([C@@H-](C(OC)=O)C(=O)7)/8)))))9))))
4-sinapoyloxybutylglucosinolate	0.4	0.56	-18.11	a small molecule	glucosinolate biosynthesis from dihomomethionine	COC2(\\C=C(C=CC(OCCCCC(=NOS(=O)(=O)[O-])S[C@H]1(O[C@H](CO)[C@@H](O)[C@H](O)[C@@H](O)1))=O)C=C(OC)C(/O)=2)	InChIKey=QLYVNSUTQJZDJB-YRFKUPOZSA-M
p-(bromoacetamido)phenyl uridyl pyrophosphate	-0.46	-0.29	-22.81	a bromoaromatic compound		C(Br)C(=O)NC3(/C=CC(\\OP(=O)([O-])OP(=O)([O-])OC[C@@H]1(O[C@H]([C@H](O)[C@H](O)1)N2(C=CC(=O)NC(=O)2)))=C/C=3)	InChIKey=RQKFRKXXIQLRRR-RAEVTNRLSA-L
verdoheme	0.26	0.43	-3.17	a heme	heme degradation I	C=CC1(/C7(=[N+]2([Fe--]35(N8(C(\\[O+]=C(C(\\C)=1)2)=C(C=C)/C(\\C)=C(C=C4(C(\\C)=C(CCC(=O)[O-])/C(=[N+]34)C=C6(N5C(\\C(\\C)=C(CCC(=O)[O-])/6)=C/7)))/8)))))	InChIKey=JFGVATQDLBFQRV-HPQJSUICSA-K
4',4'-dihydroxyadonixanthin	-1.72	-1.27	-1.78	a ketocarotenoid	astaxanthin biosynthesis (bacteria, fungi, algae)	CC(\\C=CC=C(C=CC1(/C(C[C@@H](C(C(\\C)=1)=O)O)(C)C))C)=C/C=CC=C(C)C=CC=C(C)C=CC2(/C(C[C@@H](C(O)(O)C(\\C)=2)O)(C)C)	InChIKey=FXGRLMRSIUVXCI-UWFIBFSHSA-N
dalpatein 7-O-&beta;-D-apiofuranosyl-(1->6)-&beta;-D-glucopyranoside	0.28	0.44	-18.8	an isoflavone	dalpatein and dalnigrein biosynthesis	COC6(\\C=C1(C(\\OCO1)=C/C(/C4(/C(C5(\\C=C(OC)C(\\O[C@H]2(O[C@H]([C@@H](O)[C@H](O)[C@@H](O)2)CO[C@@H]3([C@H](O)[C@](CO)(O)CO3)))=C/C(/OC=4)=5))=O))=6))	InChIKey=KAZTVTFKDLJVBH-RXHUWYBMSA-N
2-sinapoyloxy-3-butenylglucosinolate	-0.17	-0.54	-17.93	a small molecule	glucosinolate biosynthesis from dihomomethionine	C=CC(OC(=O)C=CC1(C=C(OC)C(/O)=C(C=1)/OC))CC(=NOS(=O)(=O)[O-])S[C@H]2(O[C@H](CO)[C@@H](O)[C@H](O)[C@@H](O)2)	InChIKey=WJTPNROZULSXGJ-NILQQRRASA-M
berbamunine	14.84	13.93	-4.21	a small molecule	bisbenzylisoquinoline alkaloid biosynthesis	C[N+]1(CCC6(/C(\\[C@@H]1CC5(/C=CC(\\OC2(\\C=C(C=CC(/O)=2)C[C@@H]3([N+](C)CCC4(/C\\3=C/C(/O)=C(C=4)/OC))))=C/C=5))=C/C(/O)=C(C=6)/OC))	InChIKey=FDABVSXGAMFQQH-XZWHSSHBSA-P
dioleoyl phosphatidate	-0.4	-0.22	-19.77	phosphatidate-36:2	phospholipases // "choline biosynthesis III" // "superpathway of choline biosynthesis" // "phospholipases (Chlamydomonas)" // "phosphatidate metabolism, as a signaling molecule (Chlamydomonas)" // "phosphatidate metabolism, as a signaling molecule" // "CDP-diacylglycerol biosynthesis II" // "phosphatidylglycerol biosynthesis I (plastidic)" // "CDP-diacylglycerol biosynthesis I" // "phosphatidylgl…	CCCCCCCCC=CCCCCCCCC(OC[C@@H](OC(=O)CCCCCCCC=CCCCCCCCC)COP([O-])(=O)[O-])=O	InChIKey=MHUWZNTUIIFHAS-DSSVUWSHSA-L
trihydroxyferuloyl spermidine	-0.45	-0.21	19.16	a small molecule	spermidine hydroxycinnamic acid conjugates biosynthesis	COC1(/C(/O)=C(C=C(C=1)C=CC(=O)NCCCCN(CCCNC(C=CC2(C=C(O)C(/O)=C(C=2)/OC))=O)C(=O)C=CC3(C=C(O)C(/O)=C(C=3)/OC))/O)	InChIKey=YVLXSHWZFBDIEL-SRDSWEMOSA-N
lipid X	-0.59	-0.29	2.66	a small molecule	lipid IV<sub>A</sub> biosynthesis	CCCCCCCCCCC[C@H](CC(N[C@H]1([C@H]([C@@H]([C@H](O[C@@H]1OP([O-])(=O)[O-])CO)O)OC(C[C@@H](CCCCCCCCCCC)O)=O))=O)O	InChIKey=HEHQDWUWJVPREQ-XQJZMFRCSA-L
curcumin diglucoside	-0.41	-0.22	18.68	a polyketide // "a phenol" // "a phenylpropanoid"	curcumin glucoside biosynthesis	COC4(/C(\\O[C@@H]1(O[C@H]([C@@H]([C@H]([C@@H]1O)O)O)CO))=C/C=C(C=CC(/O)=C/C(C=CC3(C=CC(/O[C@@H]2([C@@H]([C@H]([C@@H]([C@H](O2)CO)O)O)O))=C(C=3)/OC))=O)C=4)	InChIKey=HQRWPYNQQYEQRQ-QFGNJOFQSA-N
kaempferol 3-<i>O</i>-(4\,6\"-<i>O</i>-di-<i>p</i>-coumaroyl)-glucoside"	-0.45	-0.21	22.06	a flavonol derivative	flavonol acylglucoside biosynthesis I - kaempferol derivatives // "flavonol glucosylation I"	C(OC[C@@H]5(O[C@@H](OC2(/C(=O)C3(\\C(\\OC(/C1(/C=CC(\\O)=C/C=1))=2)=C/C(\\O)=C/C(/O)=3)))[C@H](O)[C@@H](O)[C@H](OC(=O)C=CC4(C=CC(\\O)=C/C=4))5))(=O)C=CC6(C=CC(\\O)=C/C=6)	InChIKey=JYRGUBRIXDOXKK-GFKRHWKYSA-N
molybdopterin adenine dinucleotide	-0.35	-0.33	-21.28	a pterin	molybdenum cofactor biosynthesis	C([C@H]3([C@H]([C@H]([C@H](N1(C2(N=CN=C(C(N=C1)=2)N)))O3)O)O))OP(OP([O-])(=O)OC[C@@H]5(O[C@@H]4(NC6(\\N=C(NC(=O)C(\\N[C@H]4C(/S)=C5/[S-])=6)N))))(=O)[O-]	InChIKey=XJXFAXLUOKQPAQ-YPRLVJTJSA-K
ubiquinone-<i>8</i>	-0.79	-0.29	-20.88	a ubiquinone	cuticular wax biosynthesis // "methylglyoxal degradation I" // "NAD/NADH phosphorylation and dephosphorylation" // "aerobic respiration III (alternative oxidase pathway)" // "aerobic respiration I (cytochrome c)" // "TCA cycle variation V (plant)" // "L-lysine degradation I" // "<i>trans</i>-lycopene biosynthesis II (oxygenic phototrophs and green sulfur bacteria)" // "superpathway of carotenoid …	CC(C)=CCCC(/C)=C/CCC(/C)=C/CCC(/C)=C/CCC(/C)=C/CCC(/C)=C/CCC(/C)=C/CCC(/C)=C/CC1(/C(C(/OC)=C(C(=O)C(\\C)=1)/OC)=O)	InChIKey=ICFIZJQGJAJRSU-SGHXUWJISA-N
ubiquinol-<i>8</i>	-0.26	-0.28	-22.48	an ubiquinol	<i>trans</i>-lycopene biosynthesis II (oxygenic phototrophs and green sulfur bacteria) // "superpathway of carotenoid biosynthesis in plants" // "L-<i>N<sup>&delta;</sup></i>-acetylornithine biosynthesis" // "L-citrulline biosynthesis" // "superpathway of L-citrulline metabolism" // "L-proline degradation" // "superpathway of glyoxylate cycle and fatty acid degradation" // "TCA cycle II (plants a…	CC(C)=CCCC(/C)=C/CCC(/C)=C/CCC(/C)=C/CCC(/C)=C/CCC(/C)=C/CCC(/C)=C/CCC(/C)=C/CC1(/C(/O)=C(C(/OC)=C(C(\\C)=1)/O)/OC)	InChIKey=LOJUQFSPYHMHEO-SGHXUWJISA-N
kaempferol-3-<i>O</i>-&beta;-gentiobioside-7-<i>O</i>-&alpha;-L-rhamnoside	-0.45	-0.21	17.06	a flavonol-3-O-[D-glucopyranosyl(1->6)D-glucopyranoside]-7-O-L-rhamnopyranoside	kaempferol glycoside biosynthesis (Arabidopsis) // "superpathway of flavones and derivatives biosynthesis" // "superpathway of flavones and derivatives biosynthesis" // "flavonol glucosylation I"	C[C@H]6(O[C@@H](OC5(/C=C4(C(/C(=O)C(\\O[C@H]1(O[C@@H]([C@H]([C@@H]([C@H]1O)O)O)CO[C@@H]2([C@@H]([C@H]([C@@H]([C@H](O2)CO)O)O)O)))=C(C3(/C=CC(\\O)=C/C=3))/O4)=C(C=5)/O)))[C@@H]([C@@H]([C@H]6O)O)O)	InChIKey=QFSDWLPMRWDFID-CSNYLUTCSA-N
isovitexin-7-O-glucosyl-2''O-rhamnoside	-4.53	-4.29	-4.4	a flavone	isovitexin glycosides biosynthesis	C[C@@H]1([C@H](O)[C@@H](O)[C@@H](O)[C@H](O1)O[C@H]6([C@@H](O)[C@H](O)[C@@H](CO)O[C@@H](C5(\\C(/O)=C3(C(\\OC(\\C2(/C=CC(\\O)=C/C=2))=C/C(=O)3)=C/C(\\O[C@H]4(O[C@H](CO)[C@@H](O)[C@H](O)[C@@H](O)4))=5)))6))	InChIKey=VSBVKAXEWZFVPV-DNACGYFNSA-N
&alpha;-3',4'-anhydrovinblastine	-0.04	-0.52	-20.25	a small molecule	vindoline, vindorosine and vinblastine biosynthesis	CCC7(/C[N+]6(CCC8(/C9(/C(\\NC(\\[C@@](C(=O)OC)(C3(/C(\\OC)=C/C4(/N(C)[C@@H]5([C@](C(OC)=O)(O)[C@H](OC(=O)C)[C@]2(CC)(C=CC[N+]1(CC[C@]([C@@H]12)(C(\\C=3)=4)5))))))C[C@H](C6)C=7)=8)=C/C=CC=9))))	InChIKey=FFRFGVHNKJYNOV-DOVUUNBWSA-P
ubiquinol-<i>9</i>	8.36	8.22	5.02	an ubiquinol	ubiquinol-9 biosynthesis (eukaryotic) // "<i>trans</i>-lycopene biosynthesis II (oxygenic phototrophs and green sulfur bacteria)" // "superpathway of carotenoid biosynthesis in plants" // "L-<i>N<sup>&delta;</sup></i>-acetylornithine biosynthesis" // "L-citrulline biosynthesis" // "superpathway of L-citrulline metabolism" // "L-proline degradation" // "superpathway of glyoxylate cycle and fatty a…	CC(C)=CCCC(/C)=C/CCC(/C)=C/CCC(/C)=C/CCC(/C)=C/CCC(/C)=C/CCC(/C)=C/CCC(/C)=C/CCC(/C)=C/CC1(/C(/O)=C(C(/OC)=C(C(\\C)=1)/O)/OC)	InChIKey=NPCOQXAVBJJZBQ-WJNLUYJISA-N
vincristine	-0.48	-0.26	18.04	an organic heterotetracyclic compound	vindoline, vindorosine and vinblastine biosynthesis	CC[C@]7(O)(C[C@H]6(C[C@](C(=O)OC)(C3(/C(\\OC)=C/C4(/N(C=O)[C@@H]5([C@](C(OC)=O)(O)[C@H](OC(=O)C)[C@]2(CC)(C=CCN1(CC[C@]([C@@H]12)(C(\\C=3)=4)5))))))C8(/NC9(/C(\\C(\\CCN(C6)C7)=8)=C/C=CC=9))))	InChIKey=OGWKCGZFUXNPDA-XQKSVPLYSA-N
